# Supplementary material for: Stereoselective synthesis of 2,5-disubstituted pyrrolidines via gold-catalysed anti-Markovnikov hydroamination-initiated tandem reactions
Source: Royal Society of Chemistry journal article supplement (doi:10.1039/c9cc05295j), 2019-01-01

Supporting Information

**Stereoselective synthesis of 2,5-disubstituted pyrrolidines through gold-catalyzed anti-Markovnikov hydroamination-initiated tandem reactions**

Tong-De Tan, Yang-Bo Chen, Ming-Yang Yang, Jia-Le Wang, Hao-Ze Su, Feng-Lin Hong, Jin-Mei Zhou, and Long-Wu Ye\*

State Key Laboratory of Physical Chemistry of Solid Surfaces and Key Laboratory for Chemical Biology of Fujian Province, College of Chemistry and Chemical Engineering, Xiamen University, Xiamen 361005, China

E-mail: [longwuye@xmu.edu.cn](mailto:longwuye@xmu.edu.cn)

| Content                                              | Page Number |
|------------------------------------------------------|-------------|
| General                                              | 2           |
| More Reaction Condition, Scope and Mechanism Studies | 3           |
| Preparation of Starting Materials                    | 6           |
| General Procedure: Gold Catalysis                    | 6           |
| Crystal Data                                         | 25          |
| HPLC Chromatograms                                   | 26          |
| <sup>1</sup> H and <sup>13</sup> C NMR Spectra       | 28          |

**General Information.** Ethyl acetate (ACS grade), hexanes (ACS grade) and anhydrous 1,2-dichloroethane (ACS grade) were obtained commercially and used without further purification. Methylene chloride, tetrahydrofuran and diethyl ether were purified according to standard methods unless otherwise noted. Commercially available reagents were used without further purification. Reactions were monitored by thin layer chromatography (TLC) using silicycle pre-coated silica gel plates. Flash column chromatography was performed over silica gel (300-400 mesh). Infrared spectra were recorded on a Nicolet AVATER FTIR330 spectrometer as thin film and are reported in reciprocal centimeter ( $\text{cm}^{-1}$ ). Mass spectra were recorded with Micromass QTOF2 Quadrupole/Time-of-Flight Tandem mass spectrometer using electron spray ionization.

$^1\text{H}$  NMR spectra were recorded on a Bruker AV-400 spectrometer and a Bruker AV-500 spectrometer in chloroform- $\text{d}_3$ . Chemical shifts are reported in ppm with the internal TMS signal at 0.0 ppm as a standard. The data is being reported as (s = singlet, d = doublet, t = triplet, m = multiplet or unresolved, brs = broad singlet, coupling constant(s) in Hz, integration).

$^{13}\text{C}$  NMR spectra were recorded on a Bruker AV-400 spectrometer and a Bruker AV-500 spectrometer in chloroform- $\text{d}_3$ . Chemical shifts are reported in ppm with the internal chloroform signal at 77.0 ppm as a standard.

## More Reaction Condition, Scope and Mechanism Studies

**Table S1** Optimization of reaction conditions of hydroamination/azidation <sup>a</sup>

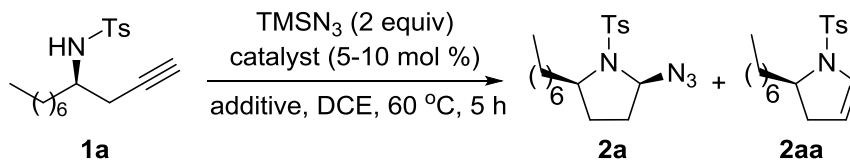

| Entry            | Catalyst                                         | Additive                         | Yield <sup>b</sup> (%) |              |              |
|------------------|--------------------------------------------------|----------------------------------|------------------------|--------------|--------------|
|                  |                                                  |                                  | 2a                     | 2aa          | 1a           |
| 1                | IPrAuNTf <sub>2</sub> (5 mol %)                  | -                                | 47                     | <1           | 7            |
| 2                | IPrAuNTf <sub>2</sub> (5 mol %)                  | Et <sub>3</sub> N (1 mol %)      | 69                     | <1           | 7            |
| 3                | IPrAuNTf <sub>2</sub> (5 mol %)                  | Et <sub>3</sub> N (1.5 mol %)    | 52                     | 2            | 14           |
| 4                | IPrAuNTf <sub>2</sub> (5 mol %)                  | Et <sub>3</sub> N (2 mol %)      | 36                     | 3            | 24           |
| <b>5</b>         | <b>IPrAuNTf<sub>2</sub> (6 mol %)</b>            | <b>Et<sub>3</sub>N (1 mol %)</b> | <b>88</b>              | <b>&lt;1</b> | <b>&lt;1</b> |
| 6                | Ph <sub>3</sub> PAuNTf <sub>2</sub> (6 mol %)    | Et <sub>3</sub> N (1 mol %)      | 70                     | 4            | <1           |
| 7 <sup>c</sup>   | CyJohnPhosAuNTf <sub>2</sub> (6 mol %)           | Et <sub>3</sub> N (1 mol %)      | 49                     | 5            | 46           |
| 8 <sup>c</sup>   | BrettPhosAuNTf <sub>2</sub> (6 mol %)            | Et <sub>3</sub> N (1 mol %)      | 25                     | 5            | 44           |
| 9 <sup>c,d</sup> | (ArO) <sub>3</sub> PAuNTf <sub>2</sub> (6 mol %) | Et <sub>3</sub> N (1 mol %)      | 12                     | 2            | 75           |
| 10 <sup>e</sup>  | Au (III) (6 mol %)                               | Et <sub>3</sub> N (1 mol %)      | 55                     | <1           | 14           |
| 11 <sup>c</sup>  | AgNTf <sub>2</sub> (10 mol %)                    | -                                | 44                     | <5           | 33           |

<sup>a</sup> Reaction conditions: **1a** (0.05 mmol), TMSN<sub>3</sub> (0.1 mmol), catalyst (5-10 mol %), DCE (0.5 mL), 60 °C, in vials. <sup>b</sup> Measured by <sup>1</sup>H NMR using diethyl phthalate as the internal standard. <sup>c</sup> Reaction time: 24 h. <sup>d</sup> Ar = 2,4-di-*tert*-butylphenyl. <sup>e</sup> Dichloro(2-picolinato)gold(III).

**Table S2** Optimization of reaction conditions of hydroamination/allylation<sup>a</sup>
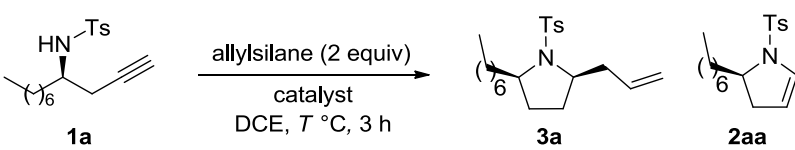

| Entry           | Catalyst                                         | T (°C)    | Yield <sup>b</sup> (%) |              |
|-----------------|--------------------------------------------------|-----------|------------------------|--------------|
|                 |                                                  |           | 3a                     | 2aa          |
| 1               | PPh <sub>3</sub> AuNTf <sub>2</sub> (5 mol %)    | 60        | 56                     | <1           |
| 2               | CyJohnPhosAuNTf <sub>2</sub> (5 mol %)           | 60        | 24                     | 4            |
| 3               | XPhosAuNTf <sub>2</sub> (5 mol %)                | 60        | 43                     | <1           |
| 4               | BrettPhosAuNTf <sub>2</sub> (5 mol %)            | 60        | 43                     | <1           |
| 5               | (ArO) <sub>3</sub> PAuNTf <sub>2</sub> (5 mol %) | 60        | 30                     | <1           |
| 6 <sup>c</sup>  | Au (III) (5 mol %)                               | 60        | 43                     | <1           |
| 7               | <b>IPrAuNTf<sub>2</sub> (5 mol %)</b>            | <b>60</b> | <b>95</b>              | <b>&lt;1</b> |
| 8               | IPrAuNTf <sub>2</sub> (5 mol %)                  | 40        | 74                     | 7            |
| 9               | IPrAuNTf <sub>2</sub> (5 mol %)                  | 80        | 60                     | 9            |
| 10              | AgNTf <sub>2</sub> (10 mol %)                    | 60        | 61                     | <5           |
| 11 <sup>d</sup> | CuOTf (10 mol %)                                 | 60        | <1                     | <1           |

<sup>a</sup> Reaction conditions: [1a] = 0.1 M, allylsilane (2 equiv), catalyst (5-10 mol %) in DCE at 60 °C, in vials. <sup>b</sup> Measured by <sup>1</sup>H NMR using diethyl phthalate as internal standard. <sup>c</sup> Dichloro(2-picolinato)gold(III). <sup>d</sup> Reaction time: 24 h, >95% of 1a remained unreacted.

**Table S3** Optimization of reaction conditions of hydroamination/indolation<sup>a</sup>
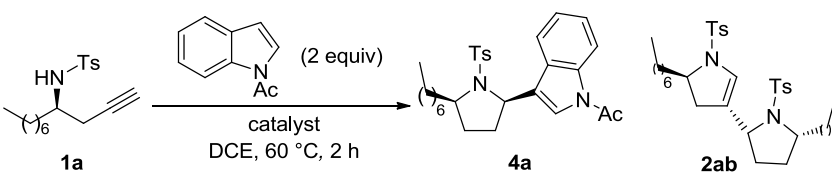

| Entry          | Catalyst                                          | Yield <sup>b</sup> (%) |              |
|----------------|---------------------------------------------------|------------------------|--------------|
|                |                                                   | 4a                     | 2ab          |
| 1              | IPrAuNTf <sub>2</sub> (5 mol %)                   | 17                     | 10           |
| 2              | BrettPhosAuNTf <sub>2</sub> (5 mol %)             | <1                     | <5           |
| 3              | CyJohnPhosAuNTf <sub>2</sub> (5 mol %)            | 27                     | 6            |
| 4              | PPh <sub>3</sub> AuNTf <sub>2</sub> (5 mol %)     | 60                     | 10           |
| 5              | (ArO) <sub>3</sub> PAuNTf <sub>2</sub> (5 mol %)  | 49                     | <1           |
| 6 <sup>c</sup> | <b>PPh<sub>3</sub>AuNTf<sub>2</sub> (5 mol %)</b> | <b>75</b>              | <b>&lt;1</b> |
| 7 <sup>d</sup> | CuOTf (10 mol %)                                  | 16                     | 4            |

<sup>a</sup> Reaction conditions: [1a] = 0.1 M, indole (2 equiv), catalyst (5-10 mol %) in DCE at 60 °C, in vials. <sup>b</sup> Measured by <sup>1</sup>H NMR using diethyl phthalate as internal standard. <sup>c</sup> 5 equiv of indole was used. <sup>d</sup> Reaction time: 24 h, 50% of 1a remained unreacted.

1. The effect of copper catalysts on the reaction of chiral homopropargyl sulfonamide **1a** with  $\text{TMSN}_3$ .

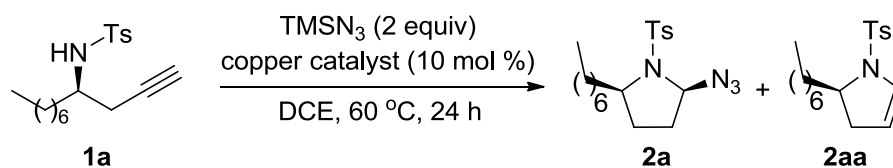

$\text{CuOTf}$ : only **1a** (90% ) was recovered.

$\text{Cu}(\text{CH}_3\text{CN})_4\text{PF}_6$ : only **1a** (>95% ) was recovered.

2. The effect of *N*-protecting group of the indole ring.

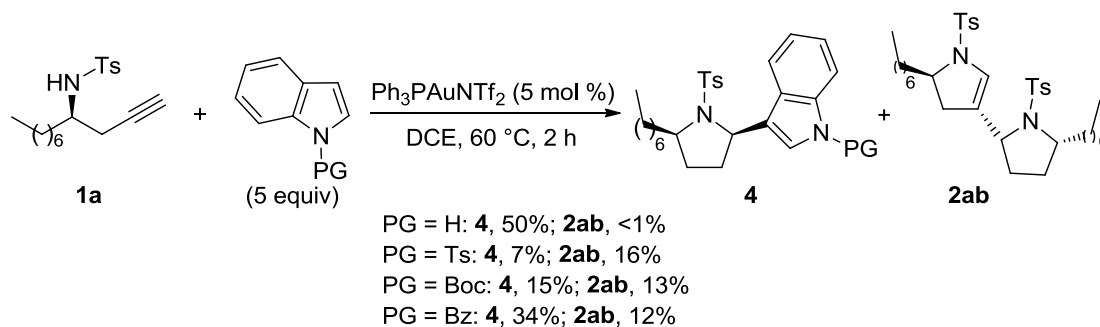

3. Plausible mechanism of hydroamination/indolation.

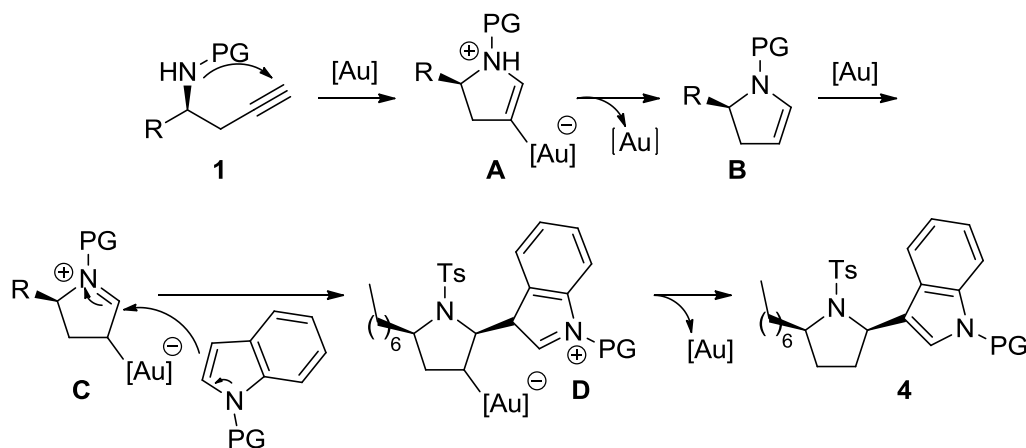

Compounds **1a-1l** were prepared according to the following known procedures<sup>1</sup> and their data were reported in our previous work.<sup>1</sup>

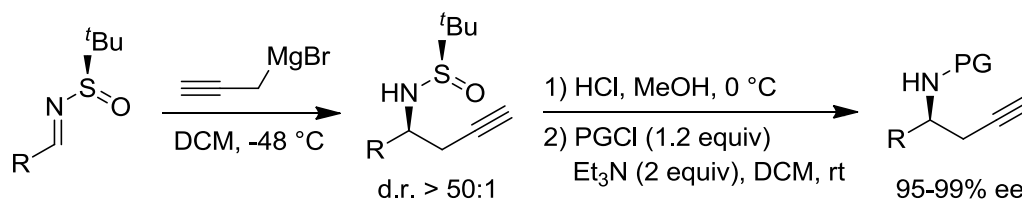

**(*R*)-4-methoxy-*N*-(undec-1-yn-4-yl)benzenesulfonamide (**1b**)**

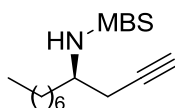

**1b**

Pale yellow oil.  $[\alpha]_D^{20} = +33.9^\circ$  ( $c = 1.0$ ,  $\text{CHCl}_3$ ).  $^1\text{H}$  NMR (400 MHz,  $\text{CDCl}_3$ )  $\delta$  7.83 (d,  $J = 8.8$  Hz, 2H), 6.97 (d,  $J = 8.8$  Hz, 2H), 4.88 (d,  $J = 9.2$  Hz, 1H), 3.87 (s, 3H), 3.35 – 3.26 (m, 1H), 2.29 (d,  $J = 2.4$  Hz, 2H), 1.98 (s, 1H), 1.59 – 1.39 (m, 2H), 1.28 – 1.10 (m, 10H), 0.86 (t,  $J = 6.8$  Hz, 3H);  $^{13}\text{C}$  NMR (100 MHz,  $\text{CDCl}_3$ )  $\delta$  162.8, 132.5, 129.1, 114.1, 79.5, 71.3, 55.5, 51.7, 33.9, 31.6, 29.0, 28.9(8), 25.4, 24.9, 22.5, 14.0; IR (neat): 3281(br), 2928, 2120, 1598, 1428, 1326, 1157, 1081, 913, 814, 668; HRESIMS Calcd for  $[\text{C}_{18}\text{H}_{27}\text{NNaO}_3\text{S}]^+$  ( $\text{M} + \text{Na}^+$ ) 360.1604, found 360.1606.

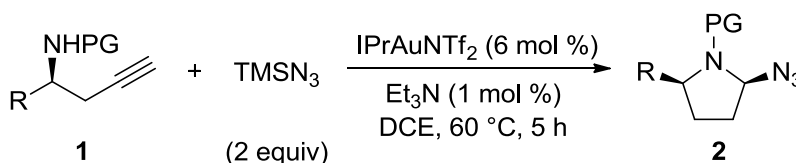

**General procedure for the synthesis of azido-substituted pyrrolidines **2**:**

$\text{TMSN}_3$  (53.0  $\mu\text{L}$ , 0.40 mmol),  $\text{Et}_3\text{N}$  (10.0  $\mu\text{L}$ , 0.2 mmol/mL in DCE) and  $\text{IPrAuNTf}_2$  (10.4 mg, 0.012 mmol) were added in this order to a solution of homopropargyl amide **1** (0.20 mmol) in DCE (2.0 mL) at room temperature (RT). The reaction mixture was then stirred at 60 °C, and the reaction progress was monitored by TLC. The reaction typically took 5 h. Upon completion, the mixture was concentrated under reduced

pressure and the residue was purified by column chromatography on silica gel (hexanes/ethyl acetate) to afford the desired product **2**.

**(2*R*,5*R*)-2-azido-5-heptyl-1-tosylpyrrolidine (2a)**

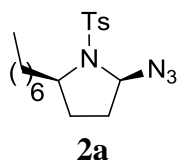

Compound **2a** was prepared in 85% yield (62.0 mg) according to the general procedure (Table 2, entry 1). Pale yellow oil.  $[\alpha]_D^{20} = -20.3^\circ$  ( $c = 1.0$ ,  $\text{CHCl}_3$ ). 99% ee (determined by HPLC: Chiralpak ASH Column, 1/99 *i*-PrOH/hexane, 0.6 mL/min, 254 nm; TR = 13.65 min (major), 18.97 min (minor)).  $^1\text{H}$  NMR (400 MHz,  $\text{CDCl}_3$ )  $\delta$  7.73 (d,  $J = 8.0$  Hz, 2H), 7.33 (d,  $J = 8.0$  Hz, 2H), 5.41 (d,  $J = 6.4$  Hz, 1H), 3.57 – 3.49 (m, 1H), 2.43 (s, 3H), 2.07 – 1.93 (m, 1H), 1.90 – 1.82 (m, 1H), 1.76 – 1.65 (m, 2H), 1.59 – 1.46 (m, 1H), 1.45 – 1.37 (m, 1H), 1.36 – 1.25 (m, 10H), 0.89 (t,  $J = 7.2$  Hz, 3H);  $^{13}\text{C}$  NMR (100 MHz,  $\text{CDCl}_3$ )  $\delta$  143.9, 135.4, 129.8, 127.3, 77.3, 61.8, 36.3, 31.7, 29.6, 29.4, 29.1, 25.6, 22.6, 21.5, 14.0; IR (neat): 2923, 2852, 2358, 2110, 1349, 1260, 1160, 1094, 801, 669; HRESIMS Calcd for  $[\text{C}_{18}\text{H}_{28}\text{N}_4\text{NaO}_2\text{S}]^+$  ( $\text{M} + \text{Na}^+$ ) 387.1825, found 387.1818.

**(2*R*,5*R*)-2-azido-5-heptyl-1-((4-methoxyphenyl)sulfonyl)pyrrolidine (2b)**

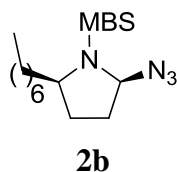

Compound **2b** was prepared in 60% yield (45.6 mg) according to the general procedure (Table 2, entry 2). Pale yellow oil.  $[\alpha]_D^{20} = -36.5^\circ$  ( $c = 1.0$ ,  $\text{CHCl}_3$ ).  $^1\text{H}$  NMR (400 MHz,  $\text{CDCl}_3$ )  $\delta$  7.79 (d,  $J = 9.2$  Hz, 2H), 7.00 (d,  $J = 8.8$  Hz, 2H), 5.40 (d,  $J = 6.4$  Hz, 1H), 3.88 (s, 3H), 3.57 – 3.49 (m, 1H), 2.02 – 1.92 (m, 1H), 1.91 – 1.83 (m, 1H), 1.76 – 1.66 (m, 2H), 1.58 – 1.49 (m, 1H), 1.47 – 1.37 (m, 1H), 1.36 – 1.19 (m, 10H), 0.89 (t,  $J = 6.4$  Hz, 3H);  $^{13}\text{C}$  NMR (100 MHz,  $\text{CDCl}_3$ )  $\delta$  163.2, 130.1, 129.4, 114.4, 77.2, 61.8, 55.6, 36.3, 31.8, 31.7, 29.6, 29.4, 29.2, 25.6, 22.6, 14.0; IR (neat):

2924, 2853, 2359, 2340, 2110, 1596, 1497, 1158, 1094, 803; HRESIMS Calcd for  $[\text{C}_{18}\text{H}_{28}\text{N}_4\text{NaO}_3\text{S}]^+$  ( $\text{M} + \text{Na}^+$ ) 403.1774, found 403.1769.

**(2*R*,5*R*)-2-azido-5-phenethyl-1-tosylpyrrolidine (2c)**

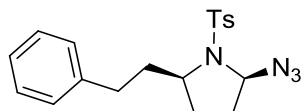

**2c**

Compound **2c** was prepared in 75% yield (45.6 mg) according to the general procedure (Table 2, entry 3). Pale yellow oil.  $[\alpha]_{\text{D}}^{20} = -56.4^\circ$  ( $c = 1.0$ ,  $\text{CHCl}_3$ ).  $^1\text{H}$  NMR (400 MHz,  $\text{CDCl}_3$ )  $\delta$  7.61 (d,  $J = 8.0$  Hz, 2H), 7.32 – 7.25 (m, 4H), 7.23 – 7.19 (m, 3H), 5.41 (d,  $J = 5.2$  Hz, 1H), 3.54 – 3.46 (m, 1H), 2.80 – 2.72 (m, 1H), 2.63 – 2.54 (m, 1H), 2.45 – 2.35 (m, 4H), 1.94 – 1.84 (m, 2H), 1.78 – 1.67 (m, 2H), 1.43 – 1.33 (m, 1H);  $^{13}\text{C}$  NMR (100 MHz,  $\text{CDCl}_3$ )  $\delta$  144.0, 141.1, 135.2, 129.9, 128.4, 127.4, 126.0, 77.4, 61.0, 37.6, 31.9, 31.8, 29.7, 21.5; IR (neat): 2921, 2850, 2358, 2108, 1598, 1455, 1351, 1259, 1161, 814; HRESIMS Calcd for  $[\text{C}_{19}\text{H}_{22}\text{N}_4\text{NaO}_2\text{S}]^+$  ( $\text{M} + \text{Na}^+$ ) 393.1356, found 393.1349.

**(2*R*,5*S*)-2-azido-5-cyclohexyl-1-tosylpyrrolidine (2d)**

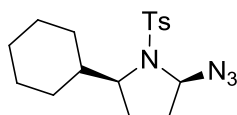

**2d**

Compound **2d** was prepared in 65% yield (45.3 mg) according to the general procedure (Table 2, entry 4). Yellow oil.  $[\alpha]_{\text{D}}^{20} = -34.2^\circ$  ( $c = 1.0$ ,  $\text{CHCl}_3$ ).  $^1\text{H}$  NMR (400 MHz,  $\text{CDCl}_3$ )  $\delta$  7.73 (d,  $J = 8.0$  Hz, 2H), 7.33 (d,  $J = 8.0$  Hz, 2H), 5.44 (d,  $J = 6.0$  Hz, 1H), 3.50 – 3.44 (m, 1H), 2.44 (s, 3H), 1.92 – 1.53 (m, 10H), 1.41 – 1.31 (m, 1H), 1.29 – 1.08 (m, 2H), 1.04 – 0.89 (m, 2H);  $^{13}\text{C}$  NMR (100 MHz,  $\text{CDCl}_3$ )  $\delta$  143.9, 135.5, 129.8, 127.5, 77.5, 66.6, 40.8, 31.4, 30.6, 26.5, 26.4, 26.3, 26.0, 25.2, 21.5; IR (neat): 2921, 2850, 2358, 2107, 1453, 1351, 1260, 1160, 1093, 814; HRESIMS Calcd for  $[\text{C}_{17}\text{H}_{24}\text{N}_4\text{NaO}_2\text{S}]^+$  ( $\text{M} + \text{Na}^+$ ) 371.1512, found 371.1517.

**(2*R*,5*S*)-2-azido-5-phenyl-1-tosylpyrrolidine (2e)**

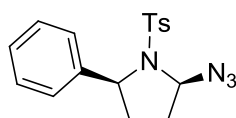

**2e**

Compound **2e** was prepared in 82% yield (56.1 mg) according to the general procedure (Table 2, entry 5). Pale yellow oil.  $[\alpha]_D^{20} = -118.4^\circ$  ( $c = 1.0$ ,  $\text{CHCl}_3$ ).  $^1\text{H}$  NMR (400 MHz,  $\text{CDCl}_3$ )  $\delta$  7.52 (d,  $J = 8.4$  Hz, 2H), 7.27 – 7.19 (m, 5H), 7.17 (d,  $J = 8.0$  Hz, 2H), 5.76 (d,  $J = 5.6$  Hz, 1H), 4.64 – 4.58 (m, 1H), 2.36 (s, 3H), 2.28 – 2.20 (m, 1H), 2.08 – 1.96 (m, 1H), 1.88 – 1.82 (m, 1H), 1.77 – 1.67 (m, 1H);  $^{13}\text{C}$  NMR (100 MHz,  $\text{CDCl}_3$ )  $\delta$  143.7, 140.8, 135.6, 129.5, 128.3, 127.5, 127.4, 126.8, 77.6, 65.3, 34.9, 32.2, 21.4; IR (neat): 2918, 2854, 2110, 1606, 1511, 1354, 1260, 1158, 1093, 815, 671; HRESIMS Calcd for  $[\text{C}_{17}\text{H}_{18}\text{N}_4\text{NaO}_2\text{S}]^+$  ( $\text{M} + \text{Na}^+$ ) 365.1043, found 365.1047.

**(2*R*,5*S*)-2-azido-5-(*p*-tolyl)-1-tosylpyrrolidine (2f)**

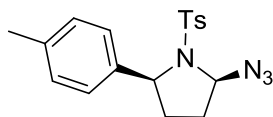

**2f**

Compound **2f** was prepared in 76% yield (54.2 mg) according to the general procedure (Table 2, entry 6). Pale yellow oil.  $[\alpha]_D^{20} = -157.6^\circ$  ( $c = 1.0$ ,  $\text{CHCl}_3$ ).  $^1\text{H}$  NMR (400 MHz,  $\text{CDCl}_3$ )  $\delta$  7.52 (d,  $J = 7.6$  Hz, 2H), 7.18 – 7.13 (m, 4H), 7.04 (d,  $J = 7.6$  Hz, 2H), 5.75 (d,  $J = 6.0$  Hz, 1H), 4.60 – 4.55 (m, 1H), 2.38 (s, 3H), 2.30 (s, 3H), 2.27 – 2.19 (m, 1H), 2.08 – 1.97 (m, 1H), 1.89 – 1.83 (m, 1H), 1.78 – 1.68 (m, 1H);  $^{13}\text{C}$  NMR (100 MHz,  $\text{CDCl}_3$ )  $\delta$  143.7, 137.8, 137.2, 135.8, 129.4, 129.0, 127.6, 126.8, 77.6, 65.1, 34.9, 32.3, 21.4, 21.0; IR (neat): 2922, 2851, 2109, 1597, 1514, 1354, 1260, 1160, 1093, 813; HRESIMS Calcd for  $[\text{C}_{18}\text{H}_{20}\text{N}_4\text{NaO}_2\text{S}]^+$  ( $\text{M} + \text{Na}^+$ ) 379.1199, found 379.1192.

**(2*R*,5*S*)-2-azido-5-(4-methoxyphenyl)-1-tosylpyrrolidine (2g)**

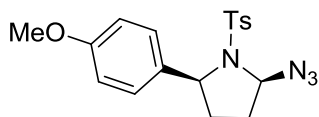

**2g**

Compound **2g** was prepared in 84% yield (62.6 mg) according to the general procedure (Table 2, entry 7). Pale yellow oil.  $[\alpha]_D^{20} = -122.2^\circ$  ( $c = 1.0$ ,  $\text{CHCl}_3$ ).  $^1\text{H}$  NMR (400 MHz,  $\text{CDCl}_3$ )  $\delta$  7.51 (d,  $J = 8.4$  Hz, 2H), 7.18 – 7.15 (m, 4H), 6.76 (d,  $J = 8.8$  Hz, 2H), 5.76 (d,  $J = 5.2$  Hz, 1H), 4.62 – 4.56 (m, 1H), 3.77 (s, 3H), 2.37 (s, 3H), 2.27 – 2.18 (m, 1H), 2.08 – 2.04 (m, 1H), 1.98 – 1.86 (m, 1H), 1.85 – 1.70 (m, 1H);  $^{13}\text{C}$  NMR (100 MHz,  $\text{CDCl}_3$ )  $\delta$  159.0, 143.6, 136.0, 132.7, 129.4, 128.1, 127.5, 113.8, 77.5, 64.9, 55.2, 34.8, 32.3, 21.4; IR (neat): 2920, 2850, 2359, 2109, 1514, 1353, 1247, 1160, 814, 669; HRESIMS Calcd for  $[\text{C}_{18}\text{H}_{20}\text{N}_4\text{NaO}_3\text{S}]^+$  ( $\text{M} + \text{Na}^+$ ) 395.1148, found 395.1141.

**(2R,5S)-2-azido-5-(4-fluorophenyl)-1-tosylpyrrolidine (2h)**

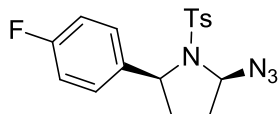

**2h**

Compound **2h** was prepared in 73% yield (52.6 mg) according to the general procedure (Table 2, entry 8). Pale yellow oil.  $[\alpha]_D^{20} = -115.9^\circ$  ( $c = 1.0$ ,  $\text{CHCl}_3$ ).  $^1\text{H}$  NMR (400 MHz,  $\text{CDCl}_3$ )  $\delta$  7.52 (d,  $J = 8.0$  Hz, 2H), 7.22 – 7.17 (m, 4H), 6.93 – 6.88 (m, 2H), 5.77 (d,  $J = 6.0$  Hz, 1H), 4.64 – 4.59 (m, 1H), 2.38 (s, 3H), 2.29 – 2.22 (m, 1H), 2.05 – 1.94 (m, 1H), 1.91 – 1.85 (m, 1H), 1.81 – 1.70 (m, 1H);  $^{13}\text{C}$  NMR (100 MHz,  $\text{CDCl}_3$ )  $\delta$  162.1 (d,  $J = 244.0$  Hz), 143.9, 136.6 (d,  $J = 3.0$  Hz), 135.7, 129.5, 128.6 (d,  $J = 8.0$  Hz), 127.5, 115.2 (d,  $J = 22.0$  Hz), 77.6, 64.6, 34.9, 32.3, 21.4; IR (neat): 2918, 2849, 2110, 1511, 1354, 1260, 1160, 1093, 815, 671; HRESIMS Calcd for  $[\text{C}_{17}\text{H}_{17}\text{FN}_4\text{NaO}_2\text{S}]^+$  ( $\text{M} + \text{Na}^+$ ) 383.0948, found 383.0942.

**(2R,5S)-2-azido-5-(4-chlorophenyl)-1-tosylpyrrolidine (2i)**

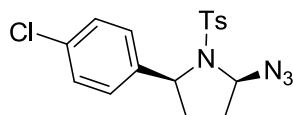

**2i**

Compound **2i** was prepared in 74% yield (55.8 mg) according to the general procedure (Table 2, entry 9). Pale yellow oil.  $[\alpha]_D^{20} = -123.9^\circ$  ( $c = 1.0$ ,  $\text{CHCl}_3$ ).  $^1\text{H}$  NMR (400 MHz,  $\text{CDCl}_3$ )  $\delta$  7.52 (d,  $J = 8.4$  Hz, 2H), 7.20 – 7.13 (m, 6H), 5.78 (d,  $J = 5.2$  Hz, 1H), 4.62 – 4.57 (m, 1H), 2.40 (s, 3H), 2.30 – 2.22 (m, 1H), 2.05 – 1.93 (m, 1H), 1.91 – 1.85 (m, 1H), 1.82 – 1.71 (m, 1H);  $^{13}\text{C}$  NMR (100 MHz,  $\text{CDCl}_3$ )  $\delta$  144.0, 139.4, 135.6, 133.3, 129.5, 128.5, 128.3, 127.6, 77.6, 64.6, 34.9, 32.3, 21.5; IR (neat): 2920, 2850, 2110, 1597, 1493, 1354, 1259, 1093, 816, 671; HRESIMS Calcd for  $[\text{C}_{17}\text{H}_{17}\text{ClN}_4\text{NaO}_2]^+$  ( $\text{M} + \text{Na}^+$ ) 399.0653, found 399.0658.

**(2R,5S)-2-azido-5-(4-bromophenyl)-1-tosylpyrrolidine (2j)**

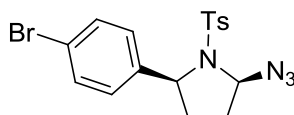

**2j**

Compound **2j** was prepared in 70% yield (59.0 mg) according to the general procedure (Table 2, entry 10). White solid (mp 154-155  $^\circ\text{C}$ ).  $[\alpha]_D^{20} = -162.0^\circ$  ( $c = 1.0$ ,  $\text{CHCl}_3$ ).  $^1\text{H}$  NMR (400 MHz,  $\text{CDCl}_3$ )  $\delta$  7.52 (d,  $J = 8.4$  Hz, 2H), 7.33 (d,  $J = 8.4$  Hz, 2H), 7.19 (d,  $J = 8.0$  Hz, 2H), 7.11 (d,  $J = 8.4$  Hz, 2H), 5.77 (d,  $J = 5.6$  Hz, 1H), 4.59 – 4.54 (m, 1H), 2.40 (s, 3H), 2.29 – 2.21 (m, 1H), 2.03 – 1.92 (m, 1H), 1.90 – 1.84 (m, 1H), 1.80 – 1.69 (m, 1H);  $^{13}\text{C}$  NMR (100 MHz,  $\text{CDCl}_3$ )  $\delta$  144.1, 139.9, 135.5, 131.4, 129.6, 128.6, 127.5, 121.4, 77.5, 64.6, 34.8, 32.3, 21.5; IR (neat): 2920, 2359, 2341, 2110, 1488, 1455, 1354, 1160, 815, 668; HRESIMS Calcd for  $[\text{C}_{17}\text{H}_{17}\text{BrN}_4\text{NaO}_2\text{S}]^+$  ( $\text{M} + \text{Na}^+$ ) 443.0148, found 443.0141.

**(2R,5S)-2-azido-5-(2-bromophenyl)-1-tosylpyrrolidine (2k)**

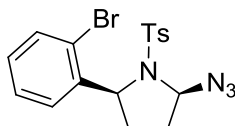

## 2k

Compound **2k** was prepared in 66% yield (55.6 mg) according to the general procedure (Table 2, entry 11). Pale yellow oil.  $[\alpha]_{\text{D}}^{20} = -66.5^{\circ}$  ( $c = 1.0$ ,  $\text{CHCl}_3$ ).  $^1\text{H}$  NMR (400 MHz,  $\text{CDCl}_3$ )  $\delta$  7.70 (d,  $J = 8.4$  Hz, 2H), 7.53 (dd,  $J = 6.8, 1.2$  Hz, 1H), 7.47 (d,  $J = 7.6$  Hz, 1H), 7.29 – 7.24 (m, 3H), 7.11 – 7.06 (m, 1H), 5.72 (d,  $J = 5.6$  Hz, 1H), 5.04 – 4.99 (m, 1H), 2.41 (s, 3H), 2.39 – 2.32 (m, 1H), 1.88 – 1.77 (m, 2H), 1.68 – 1.57 (m, 1H);  $^{13}\text{C}$  NMR (100 MHz,  $\text{CDCl}_3$ )  $\delta$  144.2, 140.5, 134.7, 132.4, 129.8, 128.8, 128.2, 127.9, 127.8, 122.0, 78.0, 64.4, 33.2, 32.0, 21.5; IR (neat): 2359, 2341, 2111, 1356, 1260, 1161, 1093, 814, 669; HRESIMS Calcd for  $[\text{C}_{17}\text{H}_{17}\text{BrN}_4\text{NaO}_2\text{S}]^+$  ( $\text{M} + \text{Na}^+$ ) 443.0148, found 443.0153.

## (2*R*,5*S*)-2-azido-5-(naphthalen-1-yl)-1-tosylpyrrolidine (2l)

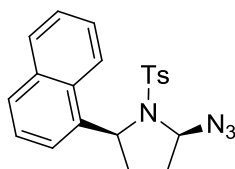

## 2l

Compound **2l** was prepared in 65% yield (51.0 mg) according to the general procedure (Table 2, entry 12). Pale yellow oil.  $[\alpha]_{\text{D}}^{20} = -174.0^{\circ}$  ( $c = 1.0$ ,  $\text{CHCl}_3$ ).  $^1\text{H}$  NMR (400 MHz,  $\text{CDCl}_3$ )  $\delta$  7.94 (d,  $J = 7.6$  Hz, 1H), 7.85 – 7.82 (m, 1H), 7.70 (d,  $J = 8.4$  Hz, 1H), 7.61 (d,  $J = 7.2$  Hz, 1H), 7.55 (d,  $J = 8.0$  Hz, 2H), 7.51 – 7.44 (m, 2H), 7.35 (t,  $J = 8.0$  Hz, 1H), 7.11 (d,  $J = 8.0$  Hz, 2H), 5.89 – 5.86 (m, 1H), 5.52 – 5.47 (m, 1H), 2.45 – 2.36 (m, 1H), 2.34 (s, 3H), 2.10 – 1.99 (m, 1H), 1.96 – 1.84 (m, 2H);  $^{13}\text{C}$  NMR (100 MHz,  $\text{CDCl}_3$ )  $\delta$  143.9, 136.3, 135.3, 133.6, 130.2, 129.4, 128.9, 127.8, 127.6, 126.1, 125.5, 125.4, 124.4, 122.3, 77.9, 62.0, 33.9, 32.1, 21.4; IR (neat): 2919, 2359, 2340, 2110, 1355, 1259, 1160, 1093, 800, 669; HRESIMS Calcd for  $[\text{C}_{21}\text{H}_{20}\text{N}_4\text{NaO}_2\text{S}]^+$  ( $\text{M} + \text{Na}^+$ ) 415.1199, found 415.1192.

## (2*S*,5*S*)-2-azido-5-heptyl-1-tosylpyrrolidine (2a')

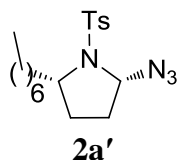

Compound **2a'** was prepared in 84% yield (61.2 mg) according to the general procedure (Table 2, entry 13). Pale yellow oil.  $[\alpha]_D^{20} = +23.6^\circ$  (c = 1.0, CHCl<sub>3</sub>).

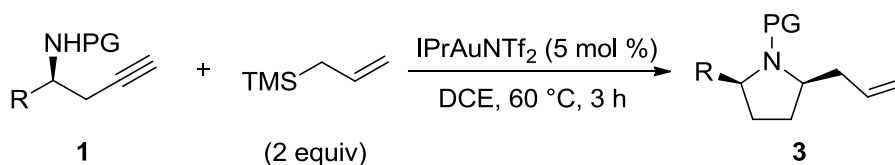

### General procedure for the synthesis of allyl- substituted pyrrolidines **3**:

Allylsilane (64.0  $\mu$ l, 0.40 mmol) and IPrAuNTf<sub>2</sub> (9.0 mg, 0.01 mmol) were added in this order to a solution of homopropargyl amide **1** (0.20 mmol) in DCE (2.0 mL) at RT. The reaction mixture was stirred at 60  $^\circ$ C, and the reaction progress was monitored by TLC. The reaction typically took 3 h. Upon completion, the mixture was concentrated under reduced pressure and the residue was purified by column chromatography on silica gel (hexanes/ethyl acetate) to afford the desired product **3**.

### (2*R*,5*R*)-2-allyl-5-heptyl-1-tosylpyrrolidine (**3a**)

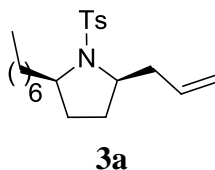

Compound **3a** was prepared in 92% yield (66.9 mg) according to the general procedure (Table 3, entry 1). Pale yellow oil.  $[\alpha]_D^{20} = -3.1^\circ$  (c = 1.0, CHCl<sub>3</sub>). 99% ee (determined by HPLC: Chiralpak ASH Column, 1/99 *i*-PrOH/hexane, 0.6 mL/min, 254 nm; TR = 13.33 min (minor), 15.03 min (major)). <sup>1</sup>H NMR (500 MHz, CDCl<sub>3</sub>)  $\delta$  7.72 (d, *J* = 8.0 Hz, 2H), 7.30 (d, *J* = 8.0 Hz, 2H), 5.84 – 5.74 (m, 1H), 5.11 – 5.05 (m, 2H), 3.65 – 3.53 (m, 2H), 2.64 – 2.58 (m, 1H), 2.43 (s, 3H), 2.31 – 2.24 (m, 1H), 1.86 – 1.81 (m, 1H), 1.57 – 1.48 (m, 1H), 1.44 – 1.33 (m, 4H), 1.30 – 1.25 (m, 10H), 0.89 (t, *J* = 6.5 Hz, 3H); <sup>13</sup>C NMR (125 MHz, CDCl<sub>3</sub>)  $\delta$  143.1, 135.1, 134.8, 129.6, 127.6,

117.4, 61.9, 60.9, 41.4, 36.9, 31.8, 29.5, 29.4, 29.3, 28.9, 26.3, 22.7, 21.5, 14.1; IR (neat): 2921, 2111, 1348, 1260, 1161, 1093, 802, 667, 591, 564; HRESIMS Calcd for  $[\text{C}_{21}\text{H}_{33}\text{NNaO}_2\text{S}]^+$  ( $\text{M} + \text{Na}^+$ ) 386.2124, found 386.2127.

**(2*R*,5*R*)-2-allyl-5-heptyl-1-((4-methoxyphenyl)sulfonyl)pyrrolidine (3b)**

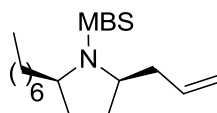

**3b**

Compound **3b** was prepared in 80% yield (60.7 mg) according to the general procedure (Table 3, entry 2). Pale yellow oil.  $[\alpha]_{\text{D}}^{20} = -33.5^\circ$  ( $c = 1.0$ ,  $\text{CHCl}_3$ ).  $^1\text{H}$  NMR (500 MHz,  $\text{CDCl}_3$ )  $\delta$  7.78 (d,  $J = 8.5$  Hz, 2H), 6.98 (d,  $J = 8.5$  Hz, 2H), 5.84 – 5.74 (m, 1H), 5.10 – 5.05 (m, 2H), 3.87 (s, 3H), 3.64 – 3.52 (m, 2H), 2.63 – 2.57 (m, 1H), 2.31 – 2.26 (m, 1H), 1.82 – 1.80 (m, 1H), 1.62 – 1.51 (m, 1H), 1.48 – 1.37 (m, 4H), 1.34 – 1.28 (m, 10H), 0.89 (t,  $J = 7.0$  Hz, 3H);  $^{13}\text{C}$  NMR (125 MHz,  $\text{CDCl}_3$ )  $\delta$  162.7, 134.8, 130.0, 129.5, 117.4, 114.1, 61.9, 60.9, 55.5, 41.4, 36.9, 31.8, 29.5(1), 29.4(5), 29.3, 28.9, 26.3, 22.7, 14.1; IR (neat): 2924, 2853, 2359, 2340, 2110, 1596, 1497, 1353, 1261, 1158, 1094, 835; HRESIMS Calcd for  $[\text{C}_{21}\text{H}_{33}\text{NNaO}_3\text{S}]^+$  ( $\text{M} + \text{Na}^+$ ) 402.2073, found 402.2078.

**(2*R*,5*R*)-2-allyl-5-phenethyl-1-tosylpyrrolidine (3c)**

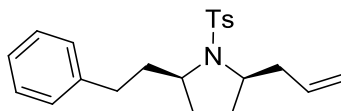

**3c**

Compound **3c** was prepared in 80% yield (59.1 mg) according to the general procedure (Table 3, entry 3). Pale yellow oil.  $[\alpha]_{\text{D}}^{20} = -22.6^\circ$  ( $c = 1.0$ ,  $\text{CHCl}_3$ ).  $^1\text{H}$  NMR (500 MHz,  $\text{CDCl}_3$ )  $\delta$  7.63 (d,  $J = 8.0$  Hz, 2H), 7.32 – 7.25 (m, 4H), 7.23 – 7.18 (m, 3H), 5.85 – 5.76 (m, 1H), 5.15 – 5.06 (m, 2H), 3.72 – 3.54 (m, 2H), 2.76 – 2.69 (m, 2H), 2.67 – 2.60 (m, 1H), 2.41 (s, 3H), 2.35 – 2.31 (m, 1H), 2.29 – 2.22 (m, 1H), 1.79 – 1.71 (m, 1H), 1.65 – 1.44 (m, 4H);  $^{13}\text{C}$  NMR (125 MHz,  $\text{CDCl}_3$ )  $\delta$  143.2, 141.6, 134.8, 134.6, 129.6, 128.4(2), 128.3(6), 127.6, 125.8, 117.6, 61.2, 61.1, 41.4, 38.2,

32.5, 29.6, 28.8, 21.5; IR (neat): 3365, 2922, 2852, 2109, 1598, 1494, 1453, 1344, 1260, 802; HRESIMS Calcd for  $[C_{22}H_{27}NNaO_2S]^+$  ( $M + Na^+$ ) 392.1651, found 392.1658.

**(2*R*,5*S*)-2-allyl-5-cyclohexyl-1-tosylpyrrolidine (3d)**

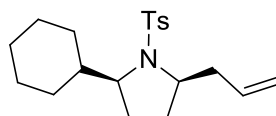

**3d**

Compound **3d** was prepared in 89% yield (61.9 mg) according to the general procedure (Table 3, entry 4). Pale yellow oil.  $[\alpha]_D^{20} = -43.7^\circ$  ( $c = 1.0$ ,  $CHCl_3$ ).  $^1H$  NMR (500 MHz,  $CDCl_3$ )  $\delta$  7.74 (d,  $J = 8.0$  Hz, 2H), 7.27 (d,  $J = 8.5$  Hz, 2H), 5.74 – 5.64 (m, 1H), 5.07 – 5.02 (m, 2H), 3.96 – 3.92 (m, 1H), 3.79 – 3.76 (m, 1H), 2.85 – 2.78 (m, 1H), 2.41 (s, 3H), 2.21 – 2.16 (m, 1H), 2.00 – 1.94 (m, 2H), 1.74 – 1.67 (m, 4H), 1.61 – 1.57 (m, 1H), 1.50 – 1.47 (m, 2H), 1.24 – 1.17 (m, 1H), 1.09 – 0.92 (m, 2H), 0.89 – 0.79 (m, 1H), 0.73 – 0.65 (m, 2H);  $^{13}C$  NMR (125 MHz,  $CDCl_3$ )  $\delta$  142.5, 139.7, 135.1, 129.3, 126.8, 117.4, 64.8, 61.1, 40.0, 39.0, 30.6, 28.9, 26.5, 26.4(8), 26.3, 25.8, 24.3, 21.4; IR (neat): 2923, 2851, 2110, 1598, 1446, 1339, 1261, 1157, 1095, 813; HRESIMS Calcd for  $[C_{20}H_{29}NNaO_2S]^+$  ( $M + Na^+$ ) 370.1811, found 370.1816.

**(2*R*,5*S*)-2-allyl-5-phenyl-1-tosylpyrrolidine (3e)**

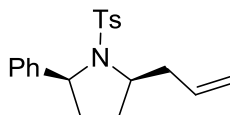

**3e**

Compound **3e** was prepared in 85% yield (58.0 mg) according to the general procedure (Table 3, entry 5). Pale yellow oil.  $[\alpha]_D^{20} = -54.2^\circ$  ( $c = 1.0$ ,  $CHCl_3$ ).  $^1H$  NMR (500 MHz,  $CDCl_3$ )  $\delta$  7.34 (d,  $J = 8.0$  Hz, 2H), 7.15 – 7.08 (m, 3H), 7.04 (d,  $J = 8.0$  Hz, 2H), 7.00 – 6.97 (m, 2H), 5.80 – 5.71 (m, 1H), 5.12 – 5.06 (m, 2H), 4.98 (d,  $J = 8.0$  Hz, 1H), 4.19 – 4.14 (m, 1H), 2.90 – 2.86 (m, 1H), 2.41 – 2.32 (m, 1H), 2.31 – 2.29 (m, 4H), 2.28 – 2.16 (m, 1H), 1.85 – 1.80 (m, 1H), 1.71 – 1.66 (m, 1H);  $^{13}C$  NMR

(125 MHz, CDCl<sub>3</sub>)  $\delta$  142.3, 142.2, 138.6, 134.8, 128.9, 128.0, 126.8, 126.7(5), 126.5, 117.7, 64.0, 60.7, 39.1, 33.0, 27.5, 21.3; IR (neat): 2922, 2851, 1641, 1494, 1453, 1341, 1261, 1156, 1095, 812; HRESIMS Calcd for [C<sub>20</sub>H<sub>23</sub>NNaO<sub>2</sub>S]<sup>+</sup> (M + Na<sup>+</sup>) 364.1342, found 364.1347.

**(2*R*,5*S*)-2-allyl-5-(*p*-tolyl)-1-tosylpyrrolidine (3f)**

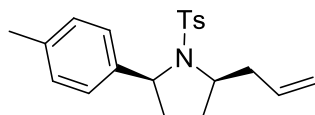

**3f**

Compound **3f** was prepared in 85% yield (60.4 mg) according to the general procedure (Table 3, entry 6). Pale yellow oil.  $[\alpha]_D^{20} = -46.6^\circ$  (c = 1.0, CHCl<sub>3</sub>). <sup>1</sup>H NMR (500 MHz, CDCl<sub>3</sub>)  $\delta$  7.34 (d, *J* = 8.0 Hz, 2H), 7.04 (d, *J* = 8.0 Hz, 2H), 6.92 – 6.87 (m, 4H), 5.80 – 5.70 (m, 1H), 5.11 – 5.06 (m, 2H), 4.93 (d, *J* = 8.5 Hz, 1H), 4.18 – 4.14 (m, 1H), 2.89 – 2.84 (m, 1H), 2.40 – 2.34 (m, 4H), 2.33 – 2.30 (m, 4H), 2.28 – 2.25 (m, 1H), 1.85 – 1.80 (m, 1H), 1.70 – 1.65 (m, 1H); <sup>13</sup>C NMR (125 MHz, CDCl<sub>3</sub>)  $\delta$  142.2, 139.3, 138.8, 136.4, 134.8, 128.8, 128.6, 126.9, 126.5, 117.6, 63.8, 60.7, 39.2, 33.1, 27.6, 21.3, 20.9; IR (neat): 2960, 2922, 2109, 1598, 1529, 1452, 1346, 1181, 1157, 811; HRESIMS Calcd for [C<sub>21</sub>H<sub>25</sub>NNaO<sub>2</sub>S]<sup>+</sup> (M + Na<sup>+</sup>) 378.1498, found 378.1494.

**(2*R*,5*S*)-2-allyl-5-(4-methoxyphenyl)-1-tosylpyrrolidine (3g)**

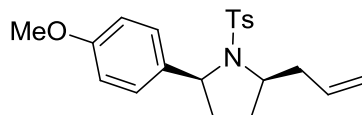

**3g**

Compound **3g** was prepared in 93% yield (69.1 mg) according to the general procedure (Table 3, entry 7). Pale yellow oil.  $[\alpha]_D^{20} = +26.9^\circ$  (c = 1.0, CHCl<sub>3</sub>). <sup>1</sup>H NMR (500 MHz, CDCl<sub>3</sub>)  $\delta$  7.68 (d, *J* = 8.0 Hz, 2H), 7.30 – 7.25 (m, 4H), 6.85 (d, *J* = 8.5 Hz, 2H), 5.85 – 5.76 (m, 1H), 5.13 – 5.06 (m, 2H), 4.65 – 4.61 (m, 1H), 3.88 – 3.83 (m, 1H), 3.80 (s, 3H), 2.85 – 2.79 (m, 1H), 2.42 (s, 3H), 2.37 – 2.30 (m, 1H), 1.90 – 1.82 (m, 2H), 1.63 – 1.58 (m, 2H); <sup>13</sup>C NMR (125 MHz, CDCl<sub>3</sub>)  $\delta$  158.6, 143.3,

135.1, 134.8, 134.6, 129.5, 127.7, 127.4, 117.6, 113.7, 64.4, 61.5, 55.3, 41.3, 34.2, 29.1, 21.5; IR (neat): 2922, 2852, 1529, 1513, 1453, 1347, 1260, 1159, 1094, 812; HRESIMS Calcd for  $[C_{21}H_{25}NNaO_3S]^+$  ( $M + Na^+$ ) 394.1447, found 394.1442.

**(2*R*,5*S*)-2-allyl-5-(4-fluorophenyl)-1-tosylpyrrolidine (3h)**

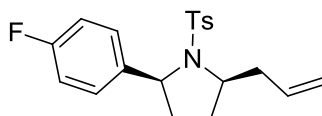

**3h**

Compound **3h** was prepared in 82% yield (59.0 mg) according to the general procedure (Table 3, entry 8). Pale yellow oil.  $[\alpha]_D^{20} = -29.7^\circ$  ( $c = 1.0$ ,  $CHCl_3$ ).  $^1H$  NMR (500 MHz,  $CDCl_3$ )  $\delta$  7.35 (d,  $J = 8.0$  Hz, 2H), 7.07 (d,  $J = 7.5$  Hz, 2H), 6.98 – 6.94 (m, 2H), 6.81 – 6.76 (m, 2H), 5.80 – 5.71 (m, 1H), 5.12 – 5.07 (m, 2H), 4.95 (d,  $J = 8.5$  Hz, 1H), 4.20 – 4.16 (m, 1H), 2.95 – 2.86 (m, 1H), 2.45 – 2.26 (m, 5H), 2.17 – 2.11 (m, 1H), 1.87 – 1.82 (m, 1H), 1.69 – 1.64 (m, 1H);  $^{13}C$  NMR (125 MHz,  $CDCl_3$ )  $\delta$  161.7 (d,  $J = 243.8$  Hz), 142.6, 138.7, 138.1 (d,  $J = 3.8$  Hz), 134.7, 129.0, 128.1 (d,  $J = 7.5$  Hz), 126.8, 117.8, 114.7 (d,  $J = 21.3$  Hz), 63.2, 60.9, 39.1, 33.0, 27.5, 21.3; IR (neat): 2920, 2850, 1510, 1454, 1343, 1261, 1156, 846, 1095, 812; HRESIMS Calcd for  $[C_{20}H_{22}FNNaO_2S]^+$  ( $M + Na^+$ ) 382.1247, found 382.1241.

**(2*R*,5*S*)-2-allyl-5-(4-chlorophenyl)-1-tosylpyrrolidine (3i)**

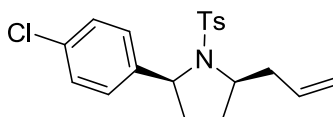

**3i**

Compound **3i** was prepared in 84% yield (63.2 mg) according to the general procedure (Table 3, entry 9). Yellow oil.  $[\alpha]_D^{20} = -31.1^\circ$  ( $c = 1.0$ ,  $CHCl_3$ ).  $^1H$  NMR (500 MHz,  $CDCl_3$ )  $\delta$  7.36 (d,  $J = 8.0$  Hz, 2H), 7.09 – 7.05 (m, 4H), 6.92 (d,  $J = 8.5$  Hz, 2H), 5.79 – 5.69 (m, 1H), 5.12 – 5.07 (m, 2H), 4.92 (d,  $J = 8.5$  Hz, 1H), 4.21 – 4.17 (m, 1H), 2.88 – 2.80 (m, 1H), 2.49 – 2.36 (m, 4H), 2.32 – 2.25 (m, 1H), 2.16 – 2.06 (m, 1H), 1.87 – 1.82 (m, 1H), 1.69 – 1.64 (m, 1H);  $^{13}C$  NMR (125 MHz,  $CDCl_3$ )  $\delta$  142.7, 140.9, 138.6, 134.6, 132.6, 129.0, 128.1, 127.9, 126.8, 117.8, 63.2, 61.0, 39.1,

33.0, 27.4, 21.4; IR (neat): 2921, 2851, 1529, 1493, 1453, 1344, 1261, 1181, 1156, 1095, 812; HRESIMS Calcd for  $[\text{C}_{20}\text{H}_{22}\text{ClNNaO}_2\text{S}]^+$  ( $\text{M} + \text{Na}^+$ ) 398.0952, found 398.0956.

**(2*R*,5*S*)-2-allyl-5-(4-bromophenyl)-1-tosylpyrrolidine (3j)**

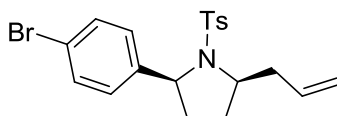

**3j**

Compound **3j** was prepared in 94% yield (79.0 mg) according to the general procedure (Table 3, entry 10). Pale yellow oil.  $[\alpha]_{\text{D}}^{20} = -27.8^\circ$  ( $c = 1.0$ ,  $\text{CHCl}_3$ ).  $^1\text{H}$  NMR (500 MHz,  $\text{CDCl}_3$ )  $\delta$  7.35 (d,  $J = 8.0$  Hz, 2H), 7.20 (d,  $J = 8.0$  Hz, 2H), 7.07 (d,  $J = 8.0$  Hz, 2H), 6.86 (d,  $J = 8.0$  Hz, 2H), 5.78 – 5.69 (m, 1H), 5.12 – 5.07 (m, 2H), 4.90 (d,  $J = 9.0$  Hz, 1H), 4.21 – 4.16 (m, 1H), 2.87 – 2.84 (m, 1H), 2.45 – 2.36 (m, 4H), 2.32 – 2.25 (m, 1H), 2.15 – 2.06 (m, 1H), 1.87 – 1.84 (m, 1H), 1.68 – 1.63 (m, 1H);  $^{13}\text{C}$  NMR (125 MHz,  $\text{CDCl}_3$ )  $\delta$  142.7, 141.3, 138.6, 134.6, 131.0, 129.0, 128.3, 126.8, 120.7, 117.8, 63.2, 61.0, 39.0, 32.9, 27.4, 21.4; IR (neat): 2922, 2851, 2359, 2341, 1529, 1453, 1345, 1261, 1156, 1095, 812; HRESIMS Calcd for  $[\text{C}_{20}\text{H}_{22}\text{BrNNaO}_2\text{S}]^+$  ( $\text{M} + \text{Na}^+$ ) 442.0447, found 442.0441.

**(2*R*,5*S*)-2-allyl-5-(2-bromophenyl)-1-tosylpyrrolidine (3k)**

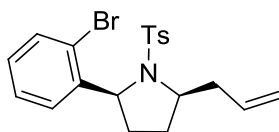

**3k**

Compound **3k** was prepared in 73% yield (61.4 mg) according to the general procedure (Table 3, entry 11). Pale yellow oil.  $[\alpha]_{\text{D}}^{20} = -83.2^\circ$  ( $c = 1.0$ ,  $\text{CHCl}_3$ ).  $^1\text{H}$  NMR (500 MHz,  $\text{CDCl}_3$ )  $\delta$  7.64 (d,  $J = 8.5$  Hz, 2H), 7.48 (d,  $J = 8.0$  Hz, 1H), 7.20 (d,  $J = 8.0$  Hz, 2H), 7.18 – 7.11 (m, 2H), 7.06 – 7.02 (m, 1H), 5.69 – 5.59 (m, 1H), 5.31 (d,  $J = 8.5$  Hz, 1H), 5.07 – 5.02 (m, 2H), 4.36 – 4.30 (m, 1H), 2.85 – 2.81 (m, 1H), 2.43 – 2.31 (m, 4H), 2.16 – 2.09 (m, 1H), 2.05 – 1.95 (m, 1H), 1.79 – 1.74 (m, 1H),

1.72 – 1.67 (m, 1H);  $^{13}\text{C}$  NMR (125 MHz,  $\text{CDCl}_3$ )  $\delta$  143.0, 141.6, 138.6, 134.5, 132.6, 129.4, 128.2, 128.0, 127.1, 126.9, 121.5, 117.9, 63.2, 61.4, 37.9, 31.8, 26.1, 21.4; IR (neat): 2920, 2359, 2341, 1343, 1155, 1095, 1023, 813, 668; HRESIMS Calcd for  $[\text{C}_{20}\text{H}_{22}\text{BrNNaO}_2\text{S}]^+$  ( $\text{M} + \text{Na}^+$ ) 442.0447, found 442.0439.

**(2*R*,5*S*)-2-allyl-5-(naphthalen-1-yl)-1-tosylpyrrolidine (3l)**

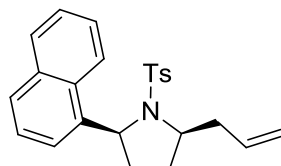

**3l**

Compound **3l** was prepared in 85% yield (66.6 mg) according to the general procedure (Table 3, entry 12). Yellow oil.  $[\alpha]_{\text{D}}^{20} = -37.7^\circ$  ( $c = 1.0$ ,  $\text{CHCl}_3$ ).  $^1\text{H}$  NMR (500 MHz,  $\text{CDCl}_3$ )  $\delta$  7.97 (d,  $J = 8.0$  Hz, 1H), 7.83 (d,  $J = 8.0$  Hz, 1H), 7.66 (d,  $J = 8.0$  Hz, 1H), 7.53 (d,  $J = 8.0$  Hz, 2H), 7.51 – 7.44 (m, 2H), 7.25 – 7.16 (m, 2H), 7.09 (d,  $J = 8.0$  Hz, 2H), 5.82 (d,  $J = 8.0$  Hz, 1H), 5.77 – 5.68 (m, 1H), 5.11 – 5.06 (m, 2H), 4.36 – 4.32 (m, 1H), 3.00 – 2.93 (m, 1H), 2.53 – 2.42 (m, 1H), 2.34 (s, 3H), 2.30 – 2.23 (m, 1H), 2.11 – 2.02 (m, 1H), 1.84 – 1.75 (m, 2H);  $^{13}\text{C}$  NMR (125 MHz,  $\text{CDCl}_3$ )  $\delta$  142.7, 138.8, 137.3, 134.8, 133.7, 129.8, 129.1, 128.9, 127.3, 127.1, 126.0, 125.3, 124.8, 124.0, 122.6, 117.8, 61.0, 60.9, 38.4, 32.0, 27.1, 21.4; IR (neat): 2920, 2359, 2341, 1340, 1260, 1154, 1096, 800, 669; HRESIMS Calcd for  $[\text{C}_{24}\text{H}_{25}\text{NNaO}_2\text{S}]^+$  ( $\text{M} + \text{Na}^+$ ) 414.1498, found 414.1496.

**(2*S*,5*S*)-2-allyl-5-heptyl-1-tosylpyrrolidine (3a')**

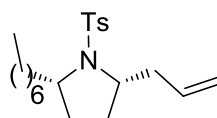

**3a'**

Compound **3a'** was prepared in 90% yield (65.4 mg) according to the general procedure (Table 3, entry 13). Pale yellow oil.  $[\alpha]_{\text{D}}^{20} = +6.5^\circ$  ( $c = 1.0$ ,  $\text{CHCl}_3$ ).

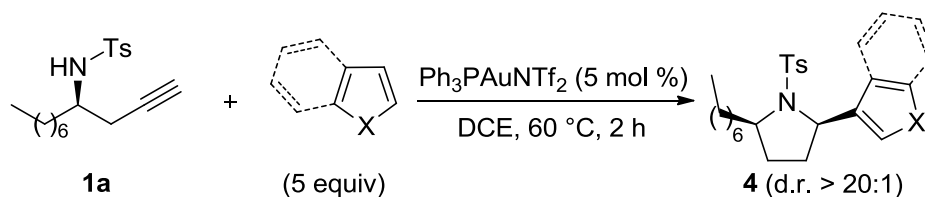

### General procedure for the synthesis of heterocycle-substituted pyrrolidines **4**:

Heterocycle (1.00 mmol) and  $\text{Ph}_3\text{PAuNTf}_2$  (7.4 mg, 0.01 mmol) were added in this order to a solution of homopropargyl amide **1a** (0.20 mmol) in DCE (2.0 mL) at RT. The reaction mixture was stirred at 60 °C, and the reaction progress was monitored by TLC. The reaction typically took 2 h. Upon completion, the mixture was concentrated under reduced pressure and the residue was purified by column chromatography on silica gel (hexanes/ethyl acetate) to afford the desired product **4**.

### 1-(3-((2*R*,5*R*)-5-heptyl-1-tosylpyrrolidin-2-yl)-1*H*-indol-1-yl)ethan-1-one (**4a**)

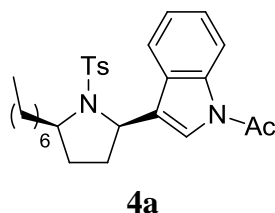

Compound **4a** was prepared in 71% yield (68.3 mg) according to the general procedure (Table 4, entry 1). Pale yellow solid (mp 94-95 °C).  $[\alpha]_{\text{D}}^{20} = +55.6$  (c = 1.0,  $\text{CHCl}_3$ ).  $^1\text{H}$  NMR (500 MHz,  $\text{CDCl}_3$ )  $\delta$  8.44 (d,  $J = 8.0$  Hz, 1H), 7.73 (d,  $J = 8.0$  Hz, 2H), 7.46 (d,  $J = 7.5$  Hz, 1H), 7.41 (s, 1H), 7.35 – 7.28 (m, 3H), 7.24 (t,  $J = 7.5$  Hz, 1H), 5.01 – 4.97 (m, 1H), 3.76 – 3.73 (m, 1H), 2.61 (s, 3H), 2.42 (s, 3H), 2.17 – 2.09 (m, 1H), 2.02 – 1.95 (m, 1H), 1.93 – 1.85 (m, 1H), 1.76 – 1.68 (m, 1H), 1.60 – 1.52 (m, 2H), 1.43 – 1.25 (m, 10H), 0.89 (t,  $J = 7.0$  Hz, 3H);  $^{13}\text{C}$  NMR (125 MHz,  $\text{CDCl}_3$ )  $\delta$  168.5, 143.5, 136.5, 134.8, 129.6, 128.2, 127.6, 125.2, 124.9, 123.3, 123.0, 118.9, 116.9, 62.1, 58.0, 37.1, 31.7, 31.5, 30.0, 29.5, 29.3, 26.6, 23.9, 22.6, 21.5, 14.0; IR (neat): 2955, 2926, 2855, 2360, 2337, 1707, 1598, 1451, 1383, 1347, 1330, 1220, 1160, 1091, 749, 665, 587, 550; HRESIMS Calcd for  $[\text{C}_{28}\text{H}_{36}\text{N}_2\text{NaO}_3\text{S}]^+$  ( $\text{M} + \text{Na}^+$ ) 503.2339, found 503.2349.

**1-(3-((2*R*,5*R*)-5-heptyl-1-tosylpyrrolidin-2-yl)-5-methyl-1*H*-indol-1-yl)ethan-1-one (4b)**

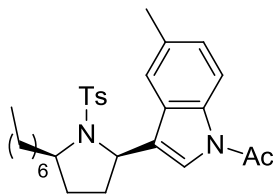

**4b**

Compound **4b** was prepared in 71% yield (70.2 mg) according to the general procedure (Table 4, entry 2). Pale yellow oil.  $[\alpha]_D^{20} = +59.5^\circ$  ( $c = 1.0$ ,  $\text{CHCl}_3$ ).  $^1\text{H}$  NMR (400 MHz,  $\text{CDCl}_3$ )  $\delta$  8.30 (d,  $J = 8.4$  Hz, 1H), 7.74 (d,  $J = 8.0$  Hz, 2H), 7.36 (s, 1H), 7.31 (d,  $J = 8.0$  Hz, 2H), 7.21 (s, 1H), 7.17 – 7.14 (m, 1H), 4.98 – 4.94 (m, 1H), 3.78 – 3.70 (m, 1H), 2.59 (s, 3H), 2.43 (s, 6H), 2.20 – 2.10 (m, 1H), 2.02 – 1.94 (m, 1H), 1.93 – 1.84 (m, 1H), 1.77 – 1.68 (m, 1H), 1.60 – 1.51 (m, 2H), 1.38 – 1.25 (m, 10H), 0.89 (t,  $J = 7.2$  Hz, 3H);  $^{13}\text{C}$  NMR (125 MHz,  $\text{CDCl}_3$ )  $\delta$  168.4, 143.5, 134.9, 134.7, 132.9, 129.6, 128.4, 127.6, 126.5, 124.7, 123.1, 118.8, 116.6, 62.1, 58.1, 37.1, 31.8, 31.5, 30.1, 29.5, 29.3, 26.7, 23.8, 22.6, 21.5, 21.4, 14.0; IR (neat): 2955, 2924, 2855, 1701, 1636, 1598, 1459, 1383, 1346, 1326, 1218, 1158, 1090, 938, 812, 666, 638, 587, 550; HRESIMS Calcd for  $[\text{C}_{29}\text{H}_{38}\text{N}_2\text{NaO}_3\text{S}]^+$  ( $\text{M} + \text{Na}^+$ ) 517.2495, found 517.2502.

**5-fluoro-3-((2*R*,5*R*)-5-heptyl-1-tosylpyrrolidin-2-yl)-1*H*-indole (4c)**

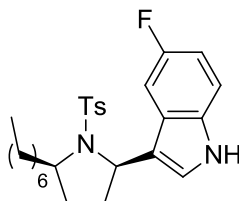

**4c**

Compound **4c** was prepared in 61% yield (55.7 mg) according to the general procedure (Table 4, entry 3). Pale yellow oil.  $[\alpha]_D^{20} = +50.4^\circ$  ( $c = 1.0$ ,  $\text{CHCl}_3$ ).  $^1\text{H}$  NMR (500 MHz,  $\text{CDCl}_3$ )  $\delta$  8.31 (s, 1H), 7.72 (d,  $J = 8.0$  Hz, 2H), 7.28 (d,  $J = 8.0$  Hz, 2H), 7.22 – 7.15 (m, 3H), 6.89 – 6.84 (m, 1H), 4.99 – 4.96 (m, 1H), 3.76 – 3.69 (m, 1H), 2.42 (s, 3H), 2.16 – 2.12 (m, 1H), 2.02 – 1.96 (m, 1H), 1.75 – 1.60 (m, 2H), 1.58

– 1.53 (m, 2H), 1.38 – 1.25 (m, 10H), 0.89 (t,  $J = 7.0$  Hz, 3H);  $^{13}\text{C}$  NMR (125 MHz,  $\text{CDCl}_3$ )  $\delta$  158.4 (d,  $J = 232.5$  Hz), 143.3, 135.0, 133.3, 129.5, 127.6, 125.4 (d,  $J = 10.0$  Hz), 124.6, 118.1 (d,  $J = 5.0$  Hz), 112.1 (d,  $J = 15.0$  Hz), 110.2 (d,  $J = 26.3$  Hz), 103.9 (d,  $J = 23.8$  Hz), 62.1, 58.7, 37.3, 32.0, 31.8, 30.0, 29.5, 29.3, 26.8, 22.6, 21.5, 14.1; IR (neat): 3385, 2955, 2926, 2856, 1627, 1579, 1486, 1457, 1339, 1158, 1091, 1036, 815, 798, 666, 587, 550; HRESIMS Calcd for  $[\text{C}_{26}\text{H}_{33}\text{FN}_2\text{NaO}_2\text{S}]^+$  ( $\text{M} + \text{Na}^+$ ) 479.2139, found 479.2134.

### 3-((2*R*,5*R*)-5-heptyl-1-tosylpyrrolidin-2-yl)-1*H*-indole-5-carbonitrile (**4d**)

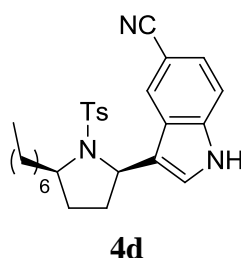

Compound **4d** was prepared in 68% yield (63.1 mg) according to the general procedure (Table 4, entry 4). Pale yellow oil.  $[\alpha]_{\text{D}}^{20} = +64.8^\circ$  ( $c = 1.0$ ,  $\text{CHCl}_3$ ).  $^1\text{H}$  NMR (500 MHz,  $\text{CDCl}_3$ )  $\delta$  8.82 (s, 1H), 7.85 (s, 1H), 7.75 (d,  $J = 8.0$  Hz, 2H), 7.34 (d,  $J = 8.0$  Hz, 2H), 7.32 – 7.27 (m, 3H), 5.02 – 4.98 (m, 1H), 3.75 – 3.69 (m, 1H), 2.45 (s, 3H), 2.19 – 2.13 (m, 1H), 1.99 – 1.92 (m, 1H), 1.89 – 1.81 (m, 1H), 1.74 – 1.67 (m, 1H), 1.62 – 1.55 (m, 2H), 1.41 – 1.24 (m, 10H), 0.89 (t,  $J = 7.0$  Hz, 3H);  $^{13}\text{C}$  NMR (125 MHz,  $\text{CDCl}_3$ )  $\delta$  143.7, 138.4, 134.5, 129.8, 127.6, 124.9, 124.6, 124.3, 120.7, 119.2, 112.3, 103.3, 102.2, 62.2, 58.4, 37.2, 32.4, 31.8, 30.0, 29.5, 29.3, 26.7, 22.6, 21.5, 14.1; IR (neat): 3373, 2953, 2925, 2855, 2219, 1619, 1598, 1470, 1436, 1337, 1157, 1090, 1034, 808, 666, 588, 551; HRESIMS Calcd for  $[\text{C}_{27}\text{H}_{33}\text{N}_3\text{NaO}_2\text{S}]^+$  ( $\text{M} + \text{Na}^+$ ) 486.2186, found 486.2182.

### methyl 3-((2*R*,5*R*)-5-heptyl-1-tosylpyrrolidin-2-yl)-1*H*-indole-6-carboxylate (**4e**)

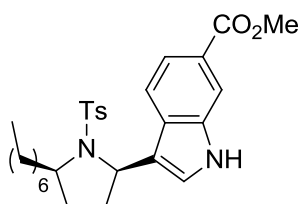

#### 4e

Compound **4e** was prepared in 60% yield (59.6 mg) according to the general procedure (Table 4, entry 5). Pale yellow oil.  $[\alpha]_{\text{D}}^{20} = +86.5^{\circ}$  ( $c = 1.0$ ,  $\text{CHCl}_3$ ).  $^1\text{H}$  NMR (500 MHz,  $\text{CDCl}_3$ )  $\delta$  8.67 (s, 1H), 8.02 (s, 1H), 7.76 (d,  $J = 8.0$  Hz, 2H), 7.72 – 7.69 (m, 1H), 7.50 (d,  $J = 8.5$  Hz, 1H), 7.38 (s, 1H), 7.30 (d,  $J = 7.5$  Hz, 2H), 5.08 – 5.04 (m, 1H), 3.93 (s, 3H), 3.76 – 3.69 (m, 1H), 2.43 (s, 3H), 2.20 – 2.12 (m, 1H), 2.04 – 1.96 (m, 1H), 1.87 – 1.79 (m, 1H), 1.74 – 1.67 (m, 1H), 1.60 – 1.52 (m, 2H), 1.34 – 1.25 (m, 10H), 0.89 (t,  $J = 7.0$  Hz, 3H);  $^{13}\text{C}$  NMR (125 MHz,  $\text{CDCl}_3$ )  $\delta$  168.1, 143.3, 136.1, 134.9, 129.6, 128.6, 127.6, 126.2, 123.3, 120.2, 118.6, 118.2, 113.8, 62.1, 58.6, 51.9, 37.3, 32.3, 31.8, 30.1, 29.5, 29.3, 26.7, 22.6, 21.5, 14.1; IR (neat): 3412, 2950, 2923, 2851, 1708, 1690, 1649, 1624, 1457, 1437, 1317, 1212, 1157, 773, 662, 588, 549; HRESIMS Calcd for  $[\text{C}_{28}\text{H}_{36}\text{N}_2\text{NaO}_4\text{S}]^+$  ( $\text{M} + \text{Na}^+$ ) 519.2288, found 519.2293.

#### (2*R*,5*R*)-2-(furan-2-yl)-5-heptyl-1-tosylpyrrolidine (4f)

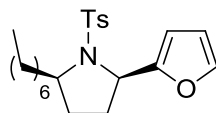

#### 4f

Compound **4f** was prepared in 58% yield (45.2 mg) according to the general procedure (Table 4, entry 6). Yellow oil.  $[\alpha]_{\text{D}}^{20} = +23.0^{\circ}$  ( $c = 1.0$ ,  $\text{CHCl}_3$ ).  $^1\text{H}$  NMR (400 MHz,  $\text{CDCl}_3$ )  $\delta$  7.68 (d,  $J = 8.0$  Hz, 2H), 7.31 – 7.25 (m, 3H), 6.30 – 6.26 (m, 2H), 4.85 – 4.81 (m, 1H), 3.75 – 3.67 (m, 1H), 2.42 (s, 3H), 2.07 – 1.94 (m, 2H), 1.77 – 1.52 (m, 3H), 1.50 – 1.33 (m, 1H), 1.29 – 1.25 (m, 10H), 0.88 (t,  $J = 6.8$  Hz, 3H);  $^{13}\text{C}$  NMR (100 MHz,  $\text{CDCl}_3$ )  $\delta$  155.0, 143.2, 141.7, 135.7, 129.5, 127.5, 110.2, 107.1, 62.0, 58.1, 36.5, 31.8, 30.4, 30.3, 29.4, 29.2, 26.3, 22.6, 21.5, 14.1; IR (neat): 2955, 2926, 2855, 1636, 1599, 1460, 1350, 1162, 1093, 1006, 815, 730, 665, 588, 550; HRESIMS Calcd for  $[\text{C}_{22}\text{H}_{31}\text{NNaO}_3\text{S}]^+$  ( $\text{M} + \text{Na}^+$ ) 412.1917, found 412.1924.

## Reference:

1. a) T.-D. Tan, X.-Q. Zhu, H.-Z. Bu, G.-C. Deng, Y.-B. Chen, R.-S. Liu, L.-W. Ye, *Angew. Chem., Int. Ed.* **2019**, 58, 9632; b) Y.-F. Yu, C. Shu, T.-D. Tan, L. Li, S. Rafique, L.-W. Ye, *Org. Lett.* **2016**, 18, 5178; c) C. Shu, L. Li, C.-H. Shen, P.-P. Ruan, C.-Y. Liu, L.-W. Ye, *Chem. Eur. J.* **2016**, 22, 2282; d) Y.-F. Yu, C. Shu, B. Zhou, J.-Q. Li, J.-M. Zhou, L.-W. Ye, *Chem. Commun.* **2015**, 51, 2126; e) C. Shu, M.-Q. Liu, Y.-Z. Sun, L.-W. Ye, *Org. Lett.* **2012**, 14, 4958.

**Compound 2j. CCDC Number = 1937618**

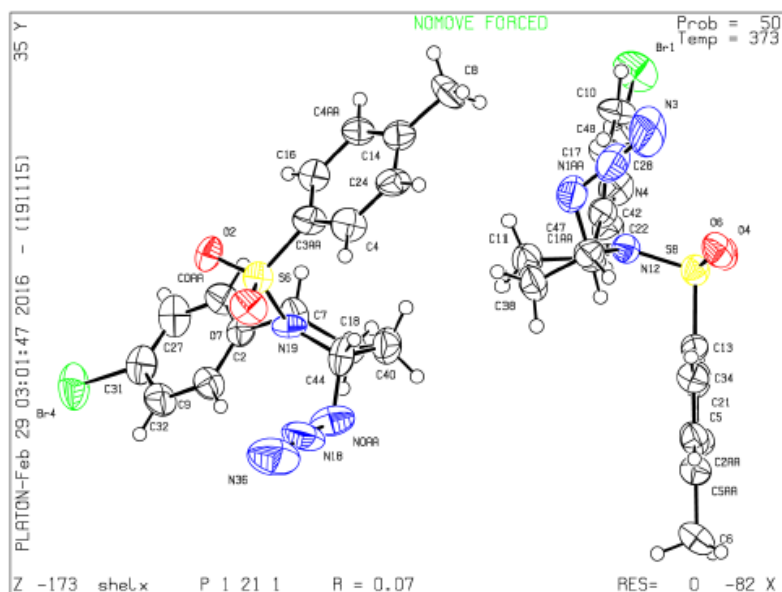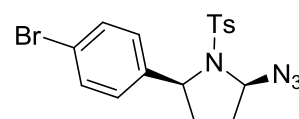

Bond precision: C-C = 0.0195 Å

Wavelength=0.71073

Cell: a=12.51500

b=13.74000

c=12.60700

alpha=90

beta=120.1900

gamma=90

Temperature: 373 K

|                        | Calculated         | Reported              |
|------------------------|--------------------|-----------------------|
| Volume                 | 1873.809           | 1874                  |
| Space group            | P 21               | P 1 21 1              |
| Hall group             | P 2yb              | P 2yb                 |
| Moiety formula         | C17 H17 Br N4 O2 S | 4(C17 H17 Br N4 O2 S) |
| Sum formula            | C17 H17 Br N4 O2 S | C68 H68 Br4 N16 O8 S4 |
| Mr                     | 421.31             | 1685.26               |
| Dx, g cm <sup>-3</sup> | 1.493              | 1.493                 |
| Z                      | 4                  | 1                     |
| Mu (mm <sup>-1</sup> ) | 2.323              | 2.323                 |
| F000                   | 856.0              | 856.0                 |
| F000'                  | 855.63             |                       |
| h,k,lmax               | 16,17,16           | 16,17,16              |
| Nref                   | 8560 [ 4462]       | 8504                  |
| Tmin,Tmax              | 0.665,0.739        | 0.279,1.000           |
| Tmin'                  | 0.622              |                       |

Correction method= # Reported T Limits: Tmin=0.279 Tmax=1.000

AbsCorr = MULTI-SCAN

Data completeness= 1.91/0.99

Theta(max)= 27.448

R(reflections)= 0.0729 ( 3855)

wR2(reflections)= 0.2339 ( 8504)

S = 0.971

Npar= 453

# Compound 2a

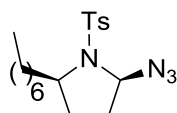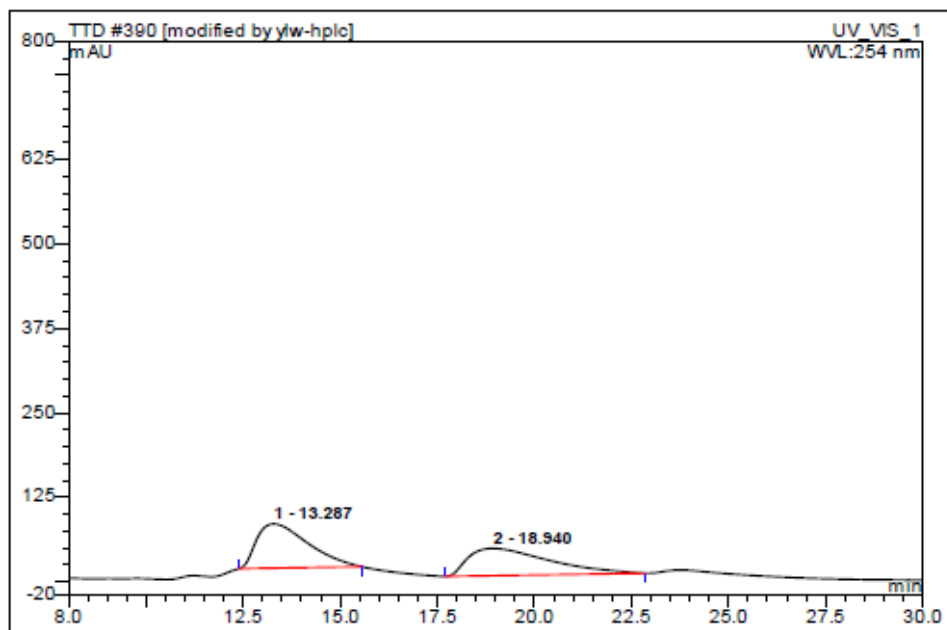

| No.    | Ret.Time<br>min | Peak Name | Height<br>mAU | Area<br>mAU*min | Rel.Area<br>% | Amount<br>n.a. | Type |
|--------|-----------------|-----------|---------------|-----------------|---------------|----------------|------|
| 1      | 13.29           | n.a.      | 65.418        | 100.404         | 50.83         | n.a.           | BMB* |
| 2      | 18.94           | n.a.      | 40.383        | 97.129          | 49.17         | n.a.           | BMB* |
| Total: |                 |           | 105.801       | 197.533         | 100.00        | 0.000          |      |

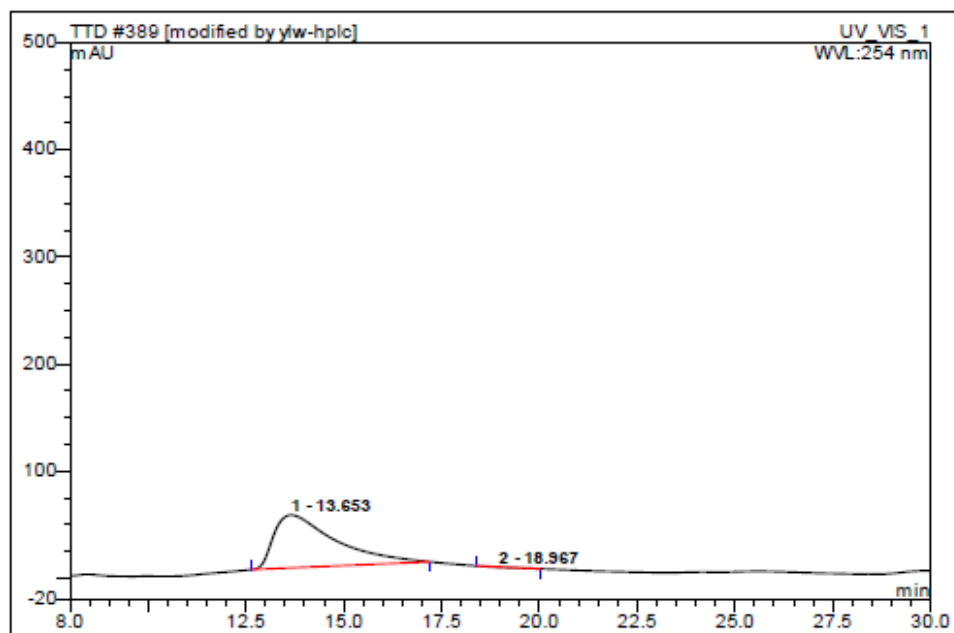

| No.    | Ret.Time<br>min | Peak Name | Height<br>mAU | Area<br>mAU*min | Rel.Area<br>% | Amount<br>n.a. | Type |
|--------|-----------------|-----------|---------------|-----------------|---------------|----------------|------|
| 1      | 13.65           | n.a.      | 49.304        | 89.578          | 99.62         | n.a.           | BMB* |
| 2      | 18.97           | n.a.      | 0.386         | 0.345           | 0.38          | n.a.           | BMB* |
| Total: |                 |           | 49.690        | 89.923          | 100.00        | 0.000          |      |

Compound **3a**

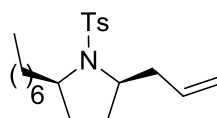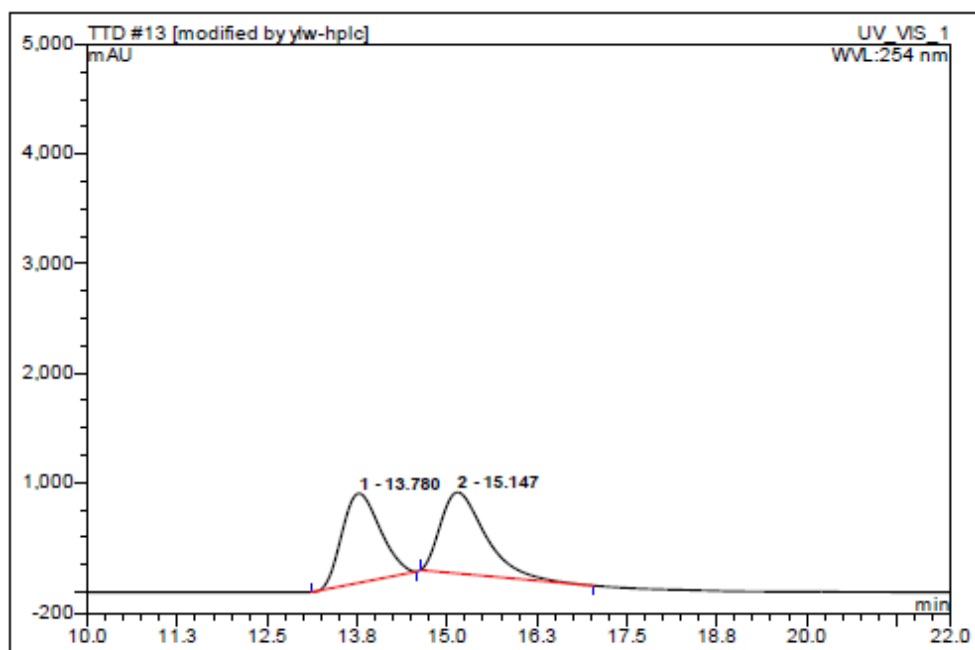

| No.    | Ret.Time<br>min | Peak Name | Height<br>mAU | Area<br>mAU*min | Rel.Area<br>% | Amount<br>n.a. | Type |
|--------|-----------------|-----------|---------------|-----------------|---------------|----------------|------|
| 1      | 13.78           | n.a.      | 814.159       | 499.572         | 48.31         | n.a.           | BMB* |
| 2      | 15.15           | n.a.      | 739.763       | 534.607         | 51.69         | n.a.           | BMB* |
| Total: |                 |           | 1553.922      | 1034.179        | 100.00        | 0.000          |      |

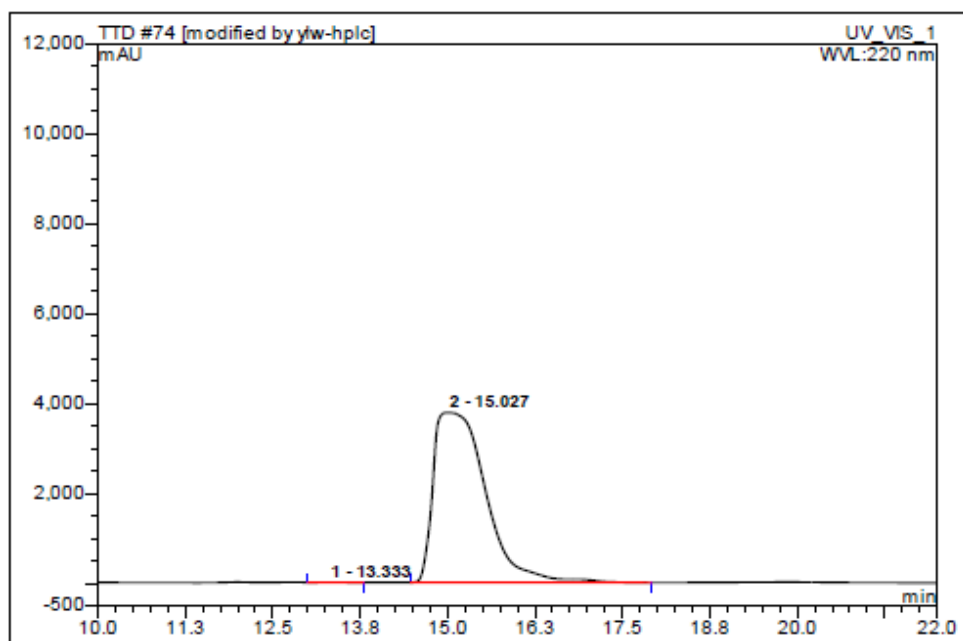

| No.    | Ret.Time<br>min | Peak Name | Height<br>mAU | Area<br>mAU*min | Rel.Area<br>% | Amount<br>n.a. | Type |
|--------|-----------------|-----------|---------------|-----------------|---------------|----------------|------|
| 1      | 13.33           | n.a.      | 2.810         | 1.176           | 0.04          | n.a.           | BMB* |
| 2      | 15.03           | n.a.      | 3781.454      | 3282.142        | 99.96         | n.a.           | BMB* |
| Total: |                 |           | 3784.264      | 3283.318        | 100.00        | 0.000          |      |

|   | Parameter              | Value               |
|---|------------------------|---------------------|
| 1 | Title                  | ttd-2-117           |
| 2 | Origin                 | Bruker BioSpin GmbH |
| 3 | Solvent                | CDC13               |
| 4 | Temperature            | 292.7               |
| 5 | Number of Scans        | 19                  |
| 6 | Acquisition Time       | 3.9846              |
| 7 | Acquisition Date       | 2016-03-11T14:34:28 |
| 8 | Spectrometer Frequency | 400.13              |
| 9 | Spectral Width         | 8223.7              |

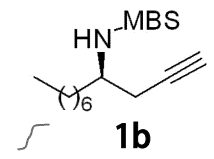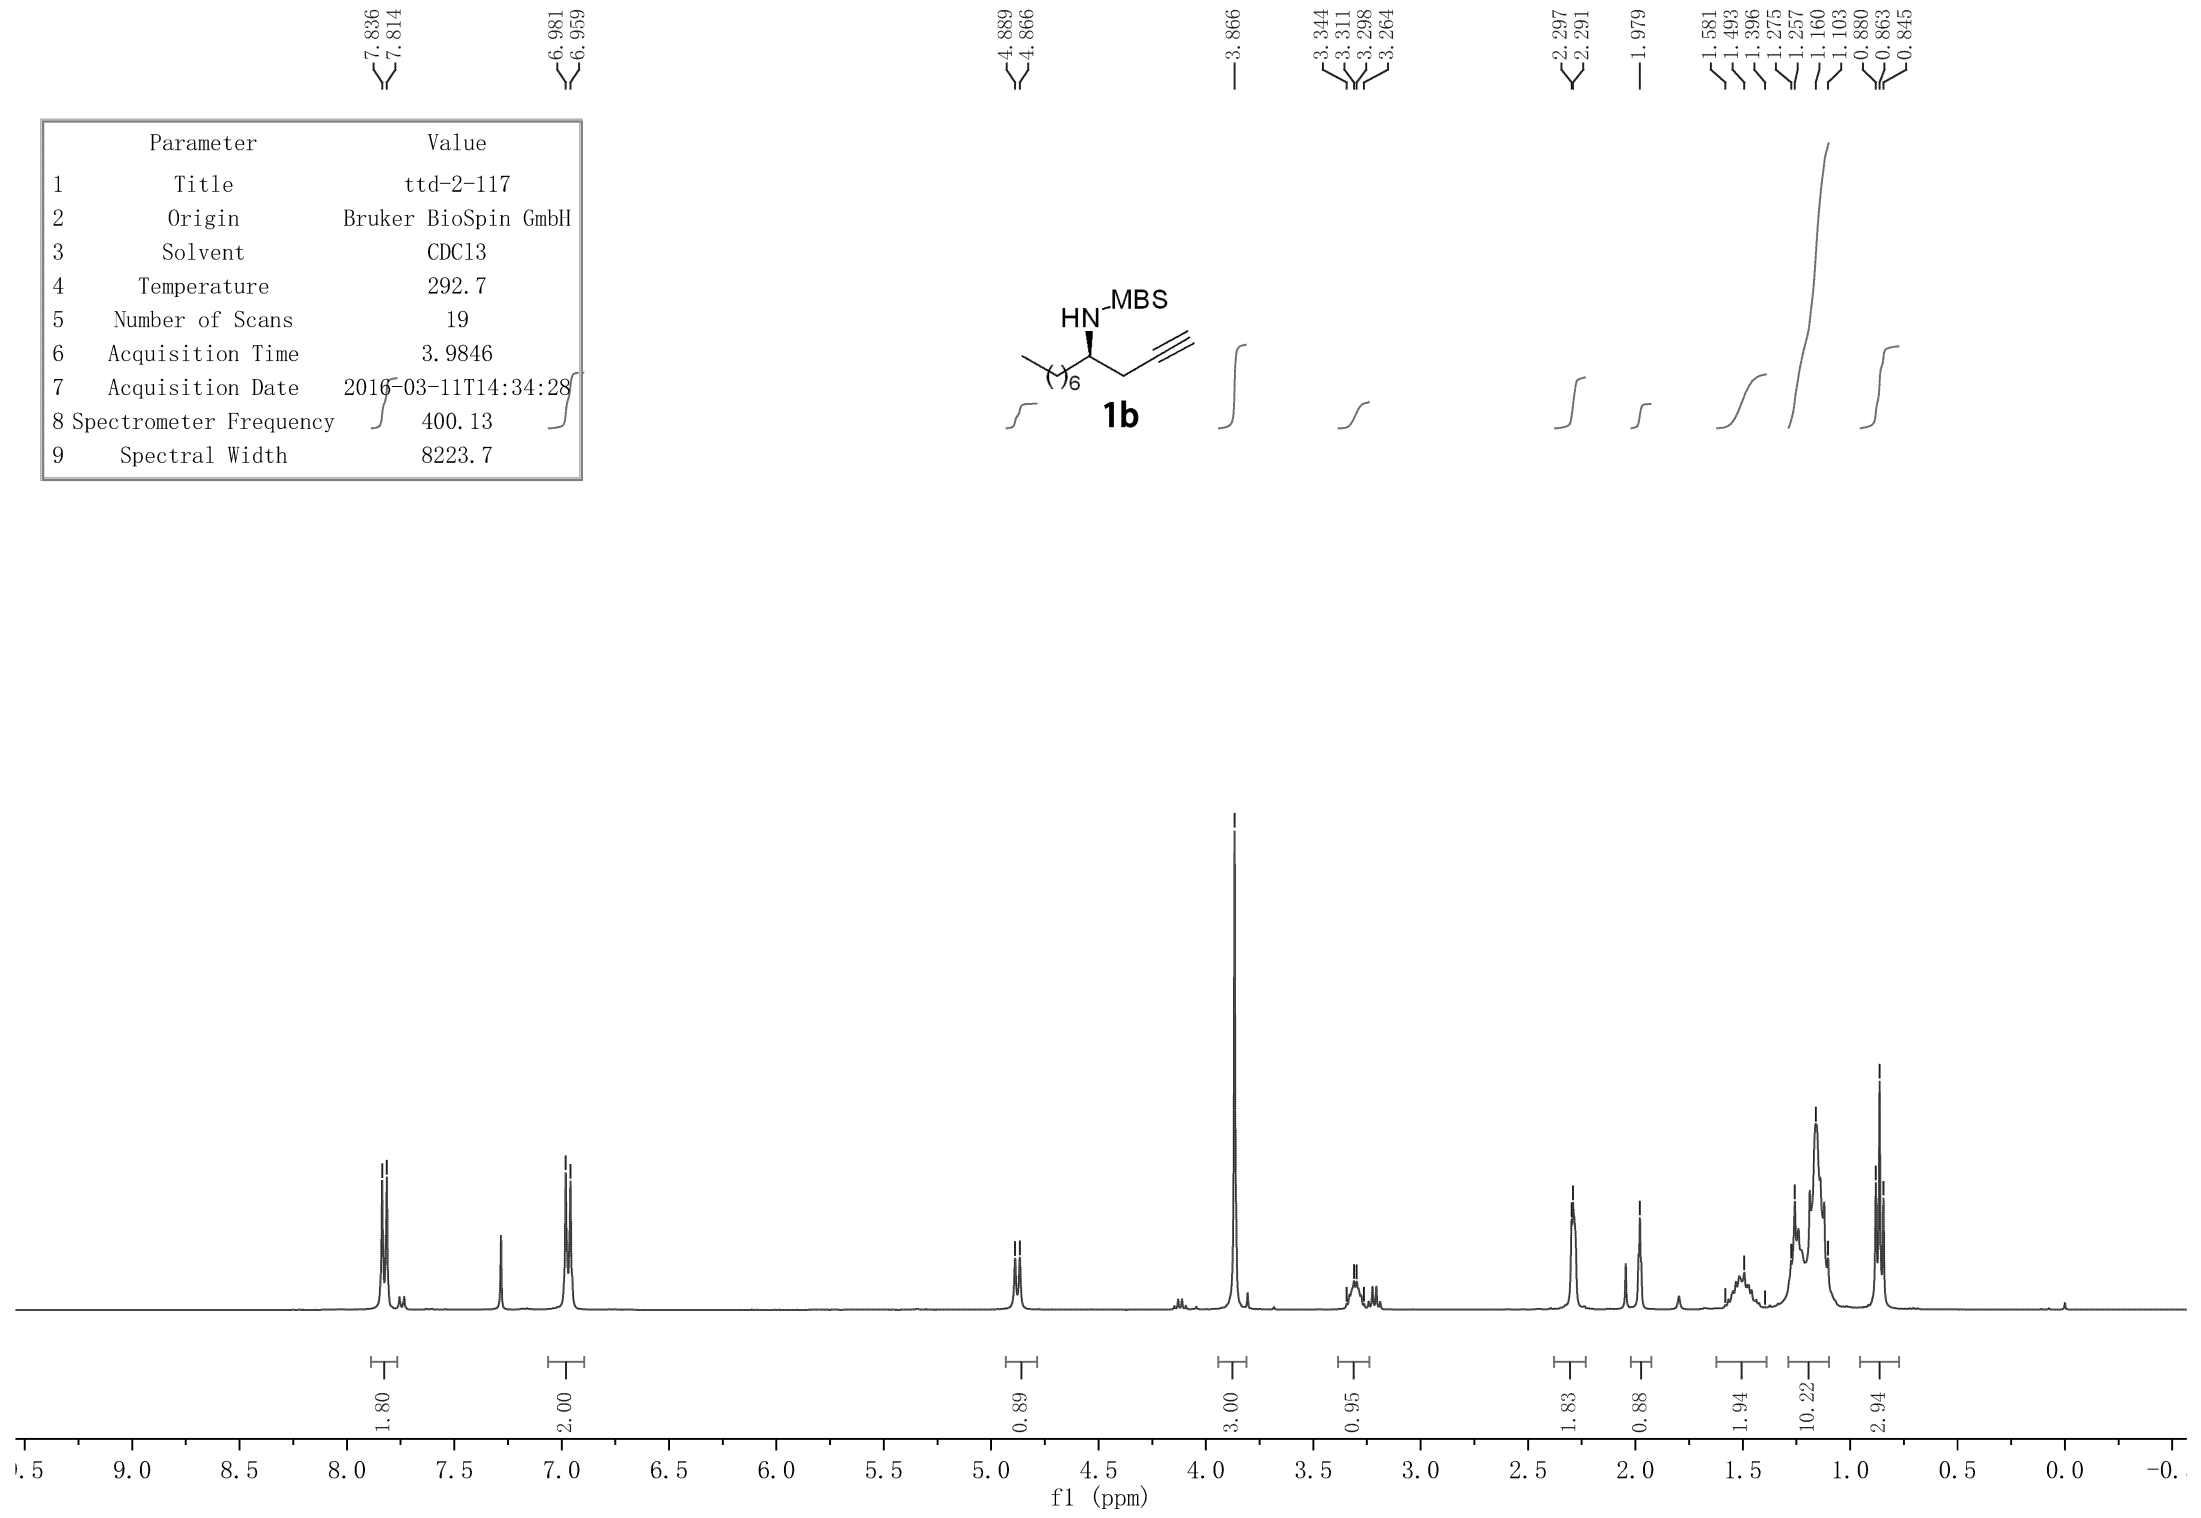

|   | Parameter              | Value               |
|---|------------------------|---------------------|
| 1 | Title                  | ttd-2-117-c         |
| 2 | Origin                 | Bruker BioSpin GmbH |
| 3 | Solvent                | CDC13               |
| 4 | Temperature            | 292.9               |
| 5 | Number of Scans        | 63                  |
| 6 | Acquisition Time       | 1.3631              |
| 7 | Acquisition Date       | 2016-03-11T14:38:11 |
| 8 | Spectrometer Frequency | 100.61              |
| 9 | Spectral Width         | 24038.5             |

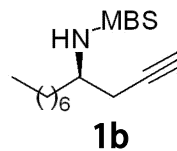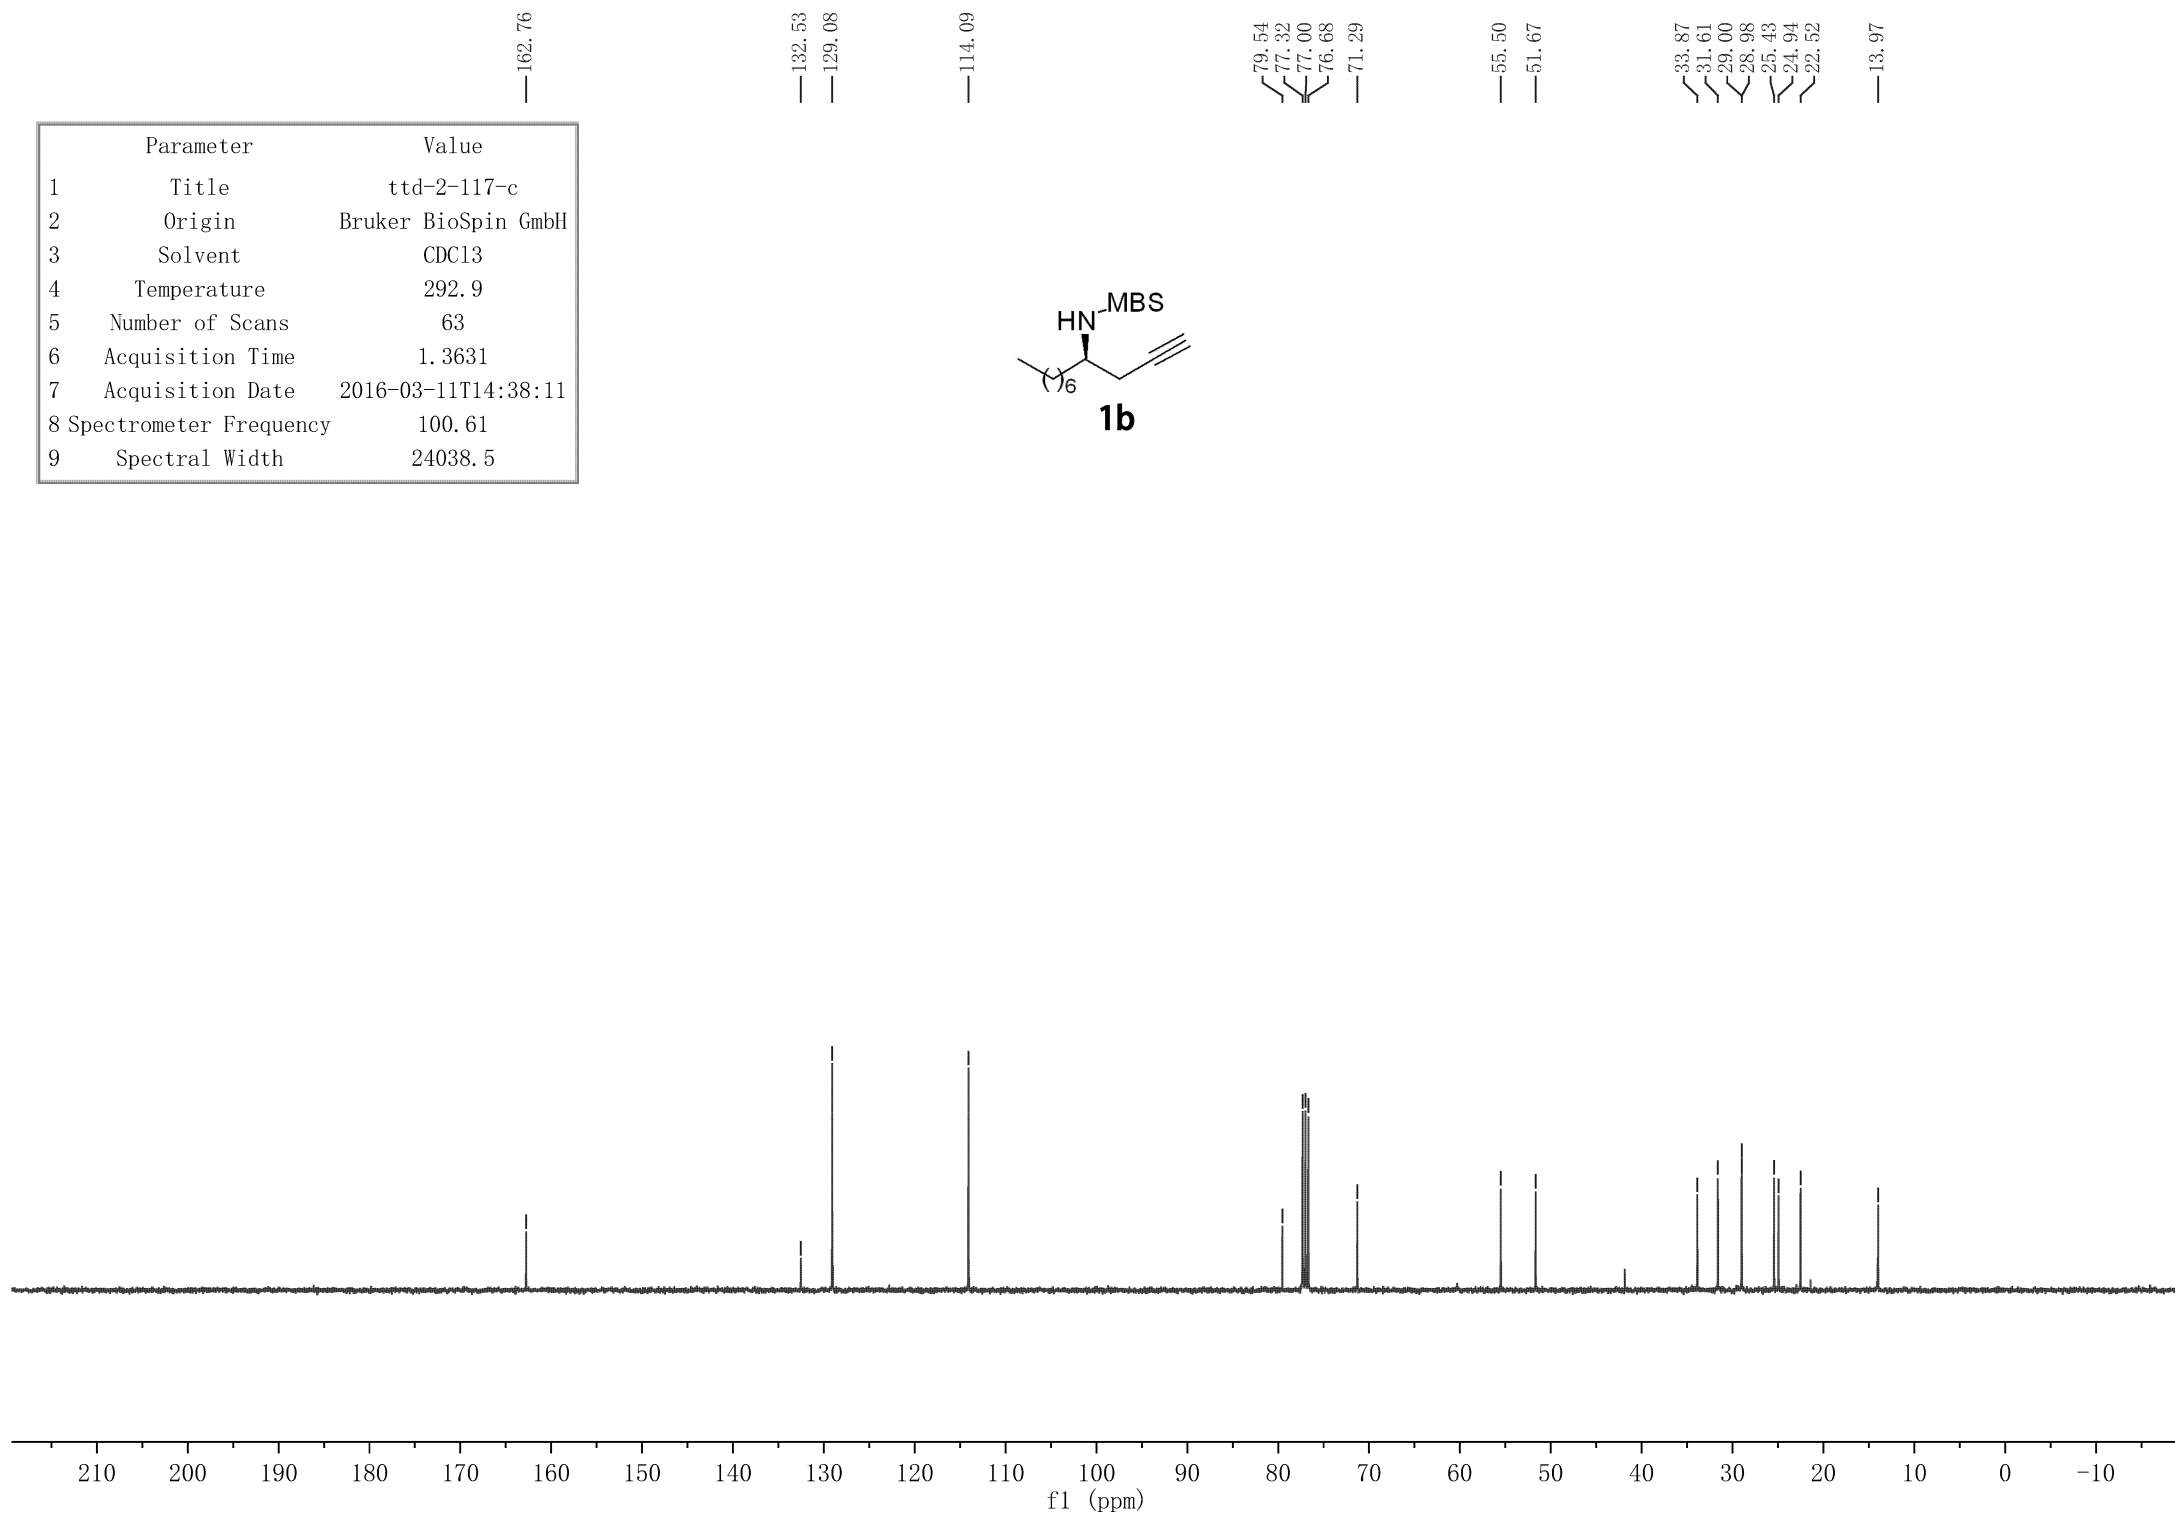

| Parameter                | Value               |
|--------------------------|---------------------|
| 1 Title                  | ttd-1-91-chun       |
| 2 Origin                 | Bruker BioSpin GmbH |
| 3 Solvent                | CDC13               |
| 4 Temperature            | 297.0               |
| 5 Number of Scans        | 12                  |
| 6 Acquisition Time       | 3.9846              |
| 7 Acquisition Date       | 2015-09-11T11:17:12 |
| 8 Spectrometer Frequency | 400.03              |
| 9 Spectral Width         | 8223.7              |

7.742  
7.722

7.341  
7.321

5.417  
5.401

3.560  
3.537  
3.509  
3.491

2.435

2.018  
1.845  
1.823  
1.751  
1.709  
1.657  
1.550  
1.440  
1.409  
1.370  
1.356  
1.289  
1.258  
1.205  
0.889  
0.871

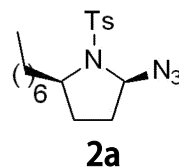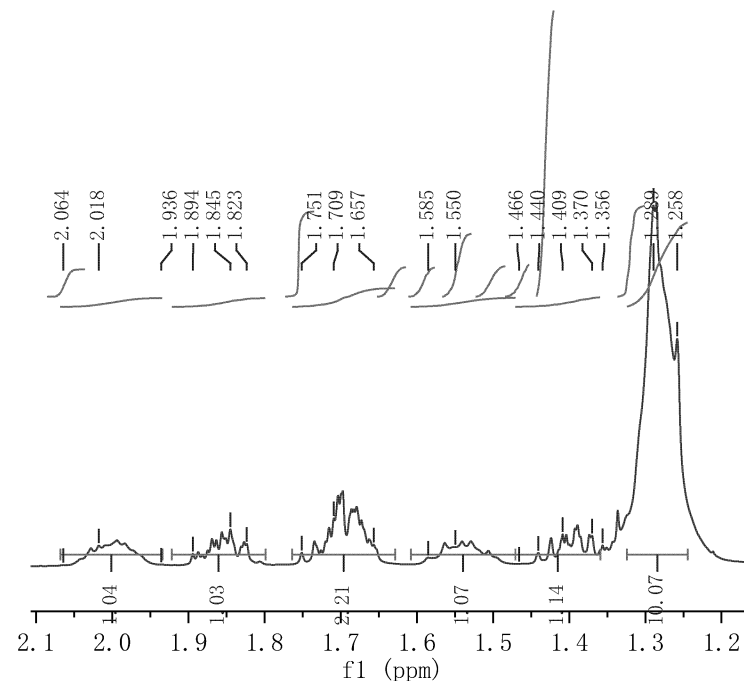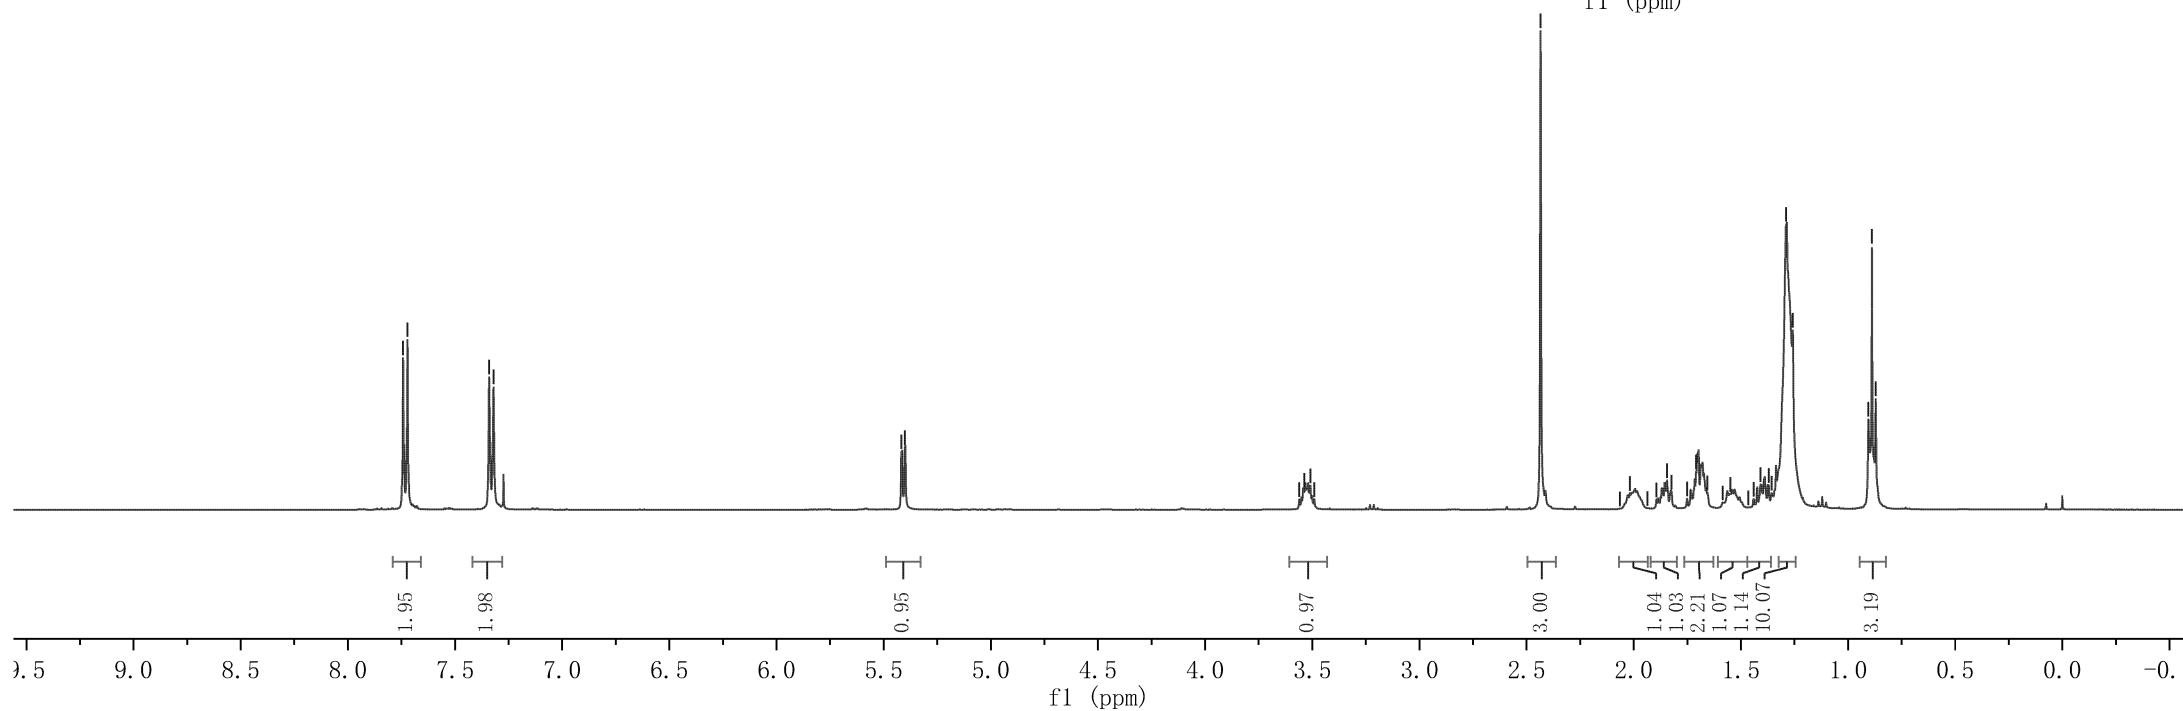

|   | Parameter              | Value               |
|---|------------------------|---------------------|
| 1 | Title                  | ttd-1-91-chun-c13   |
| 2 | Origin                 | Bruker BioSpin GmbH |
| 3 | Solvent                | CDCl3               |
| 4 | Temperature            | 297.3               |
| 5 | Number of Scans        | 36                  |
| 6 | Acquisition Time       | 1.3631              |
| 7 | Acquisition Date       | 2015-09-11T11:21:56 |
| 8 | Spectrometer Frequency | 100.59              |
| 9 | Spectral Width         | 24038.5             |

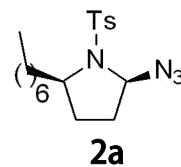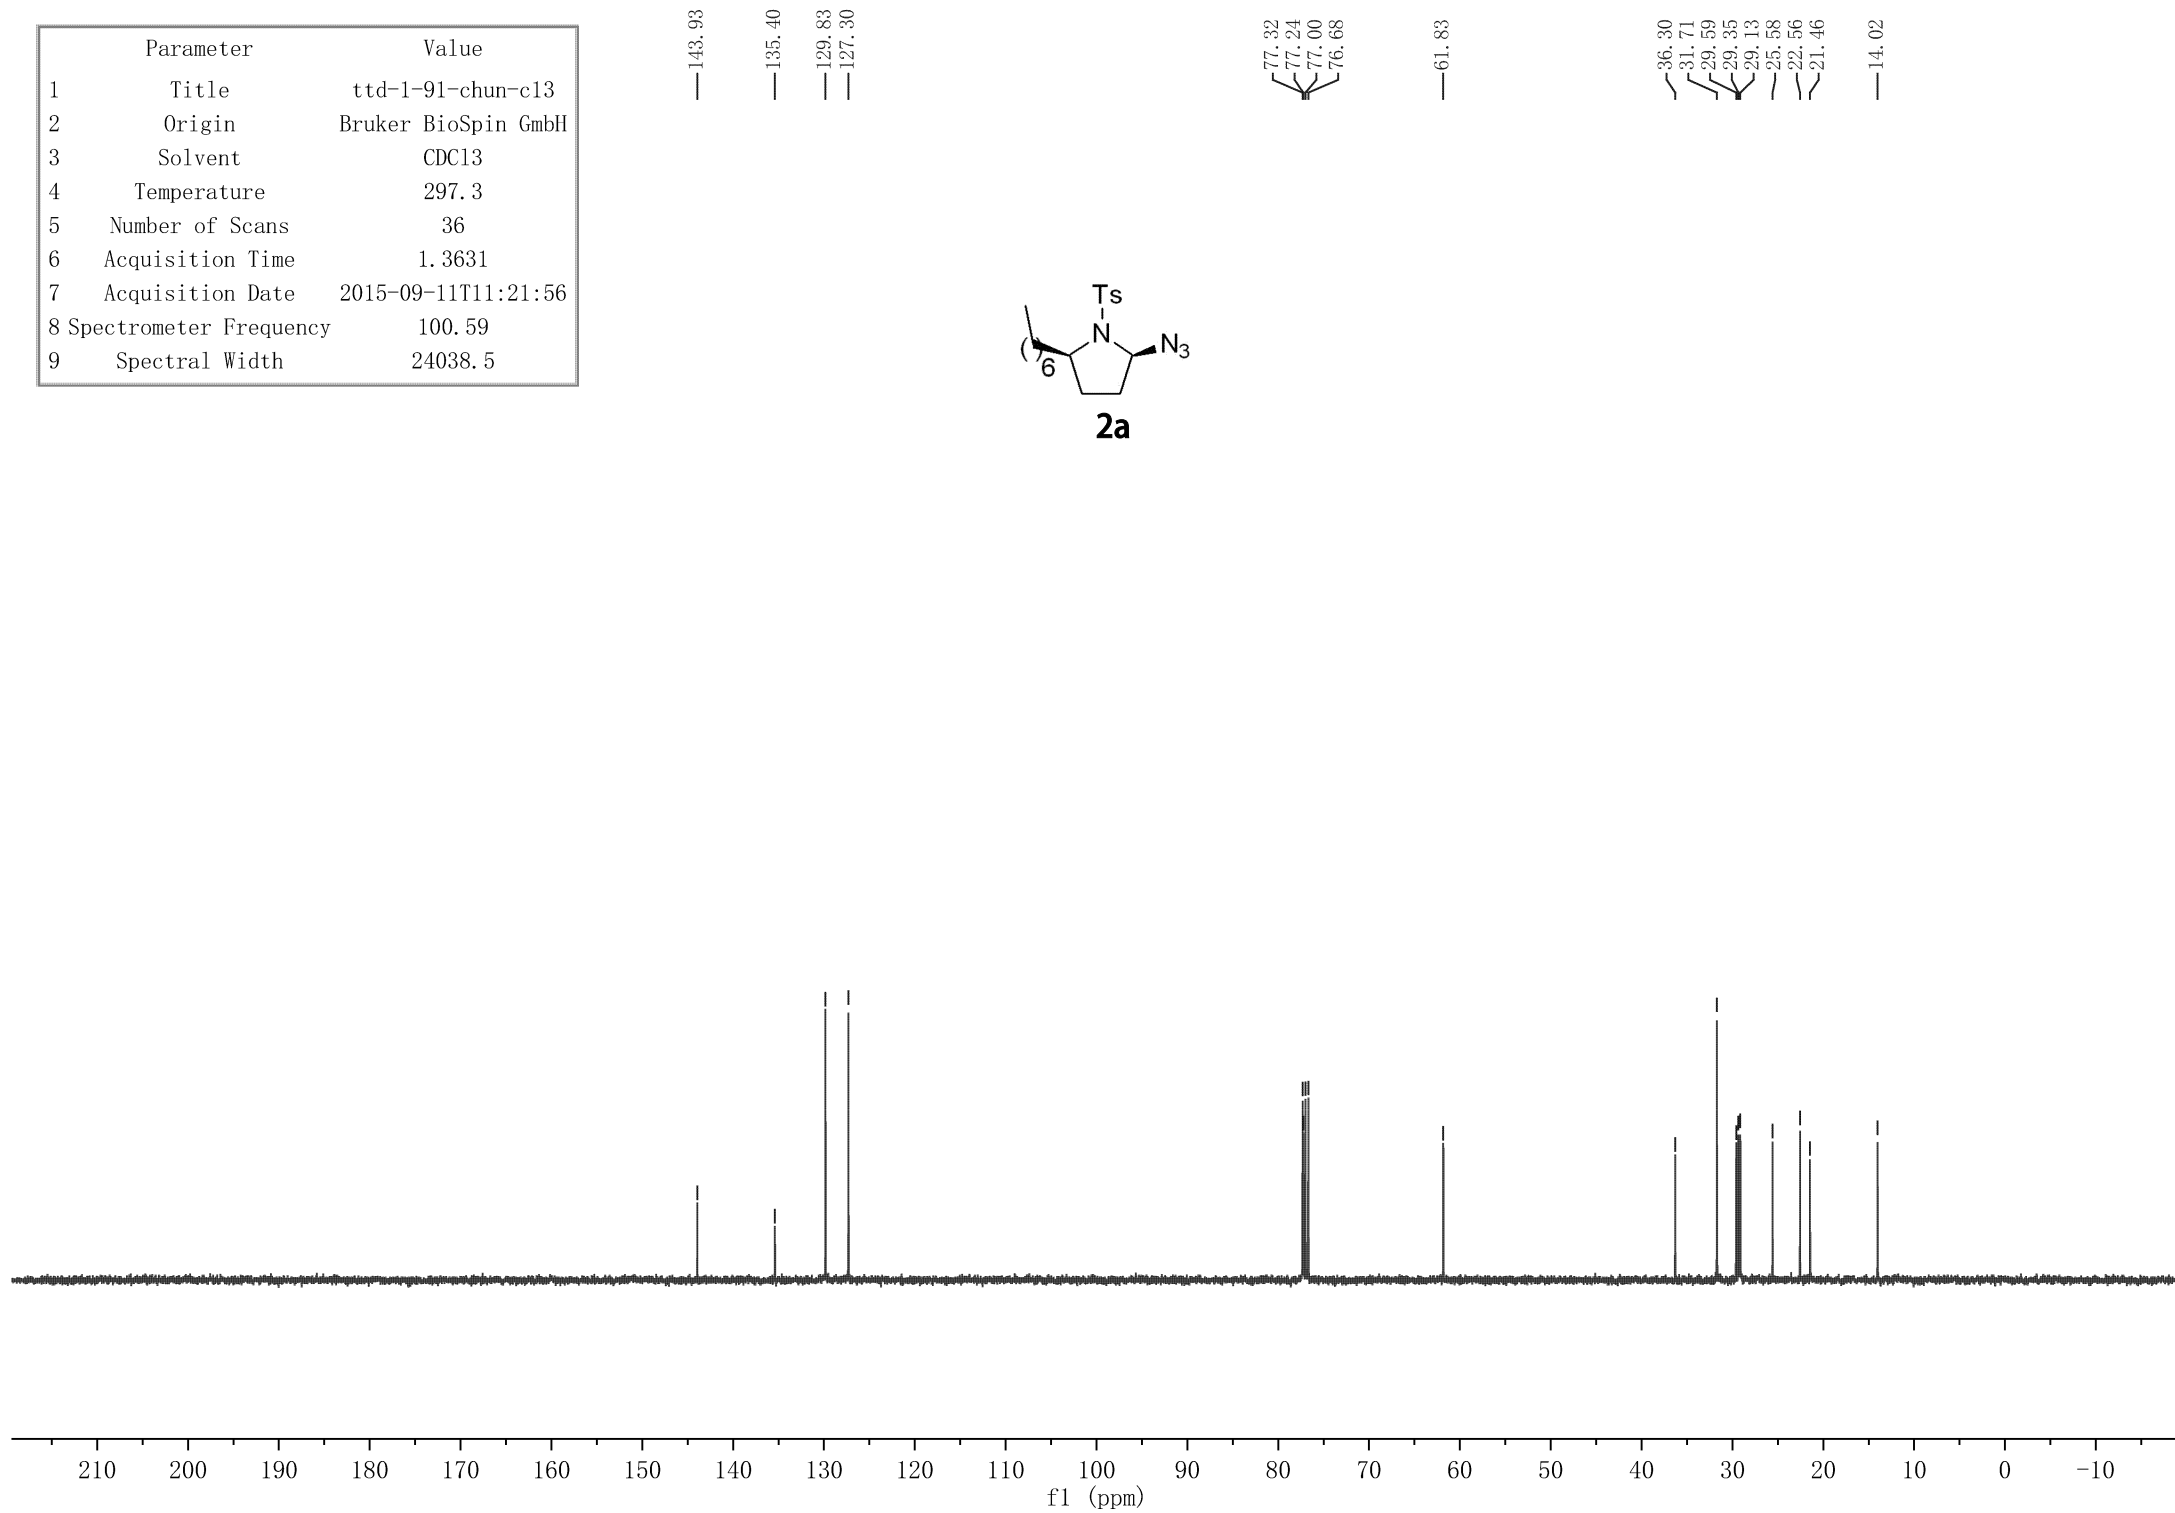

| Parameter                | Value               |
|--------------------------|---------------------|
| 1 Title                  | ttd-2-121-1         |
| 2 Origin                 | Bruker BioSpin GmbH |
| 3 Solvent                | CDC13               |
| 4 Temperature            | 293.5               |
| 5 Number of Scans        | 16                  |
| 6 Acquisition Time       | 3.9846              |
| 7 Acquisition Date       | 2016-03-14T21:00:34 |
| 8 Spectrometer Frequency | 400.13              |
| 9 Spectral Width         | 8223.7              |

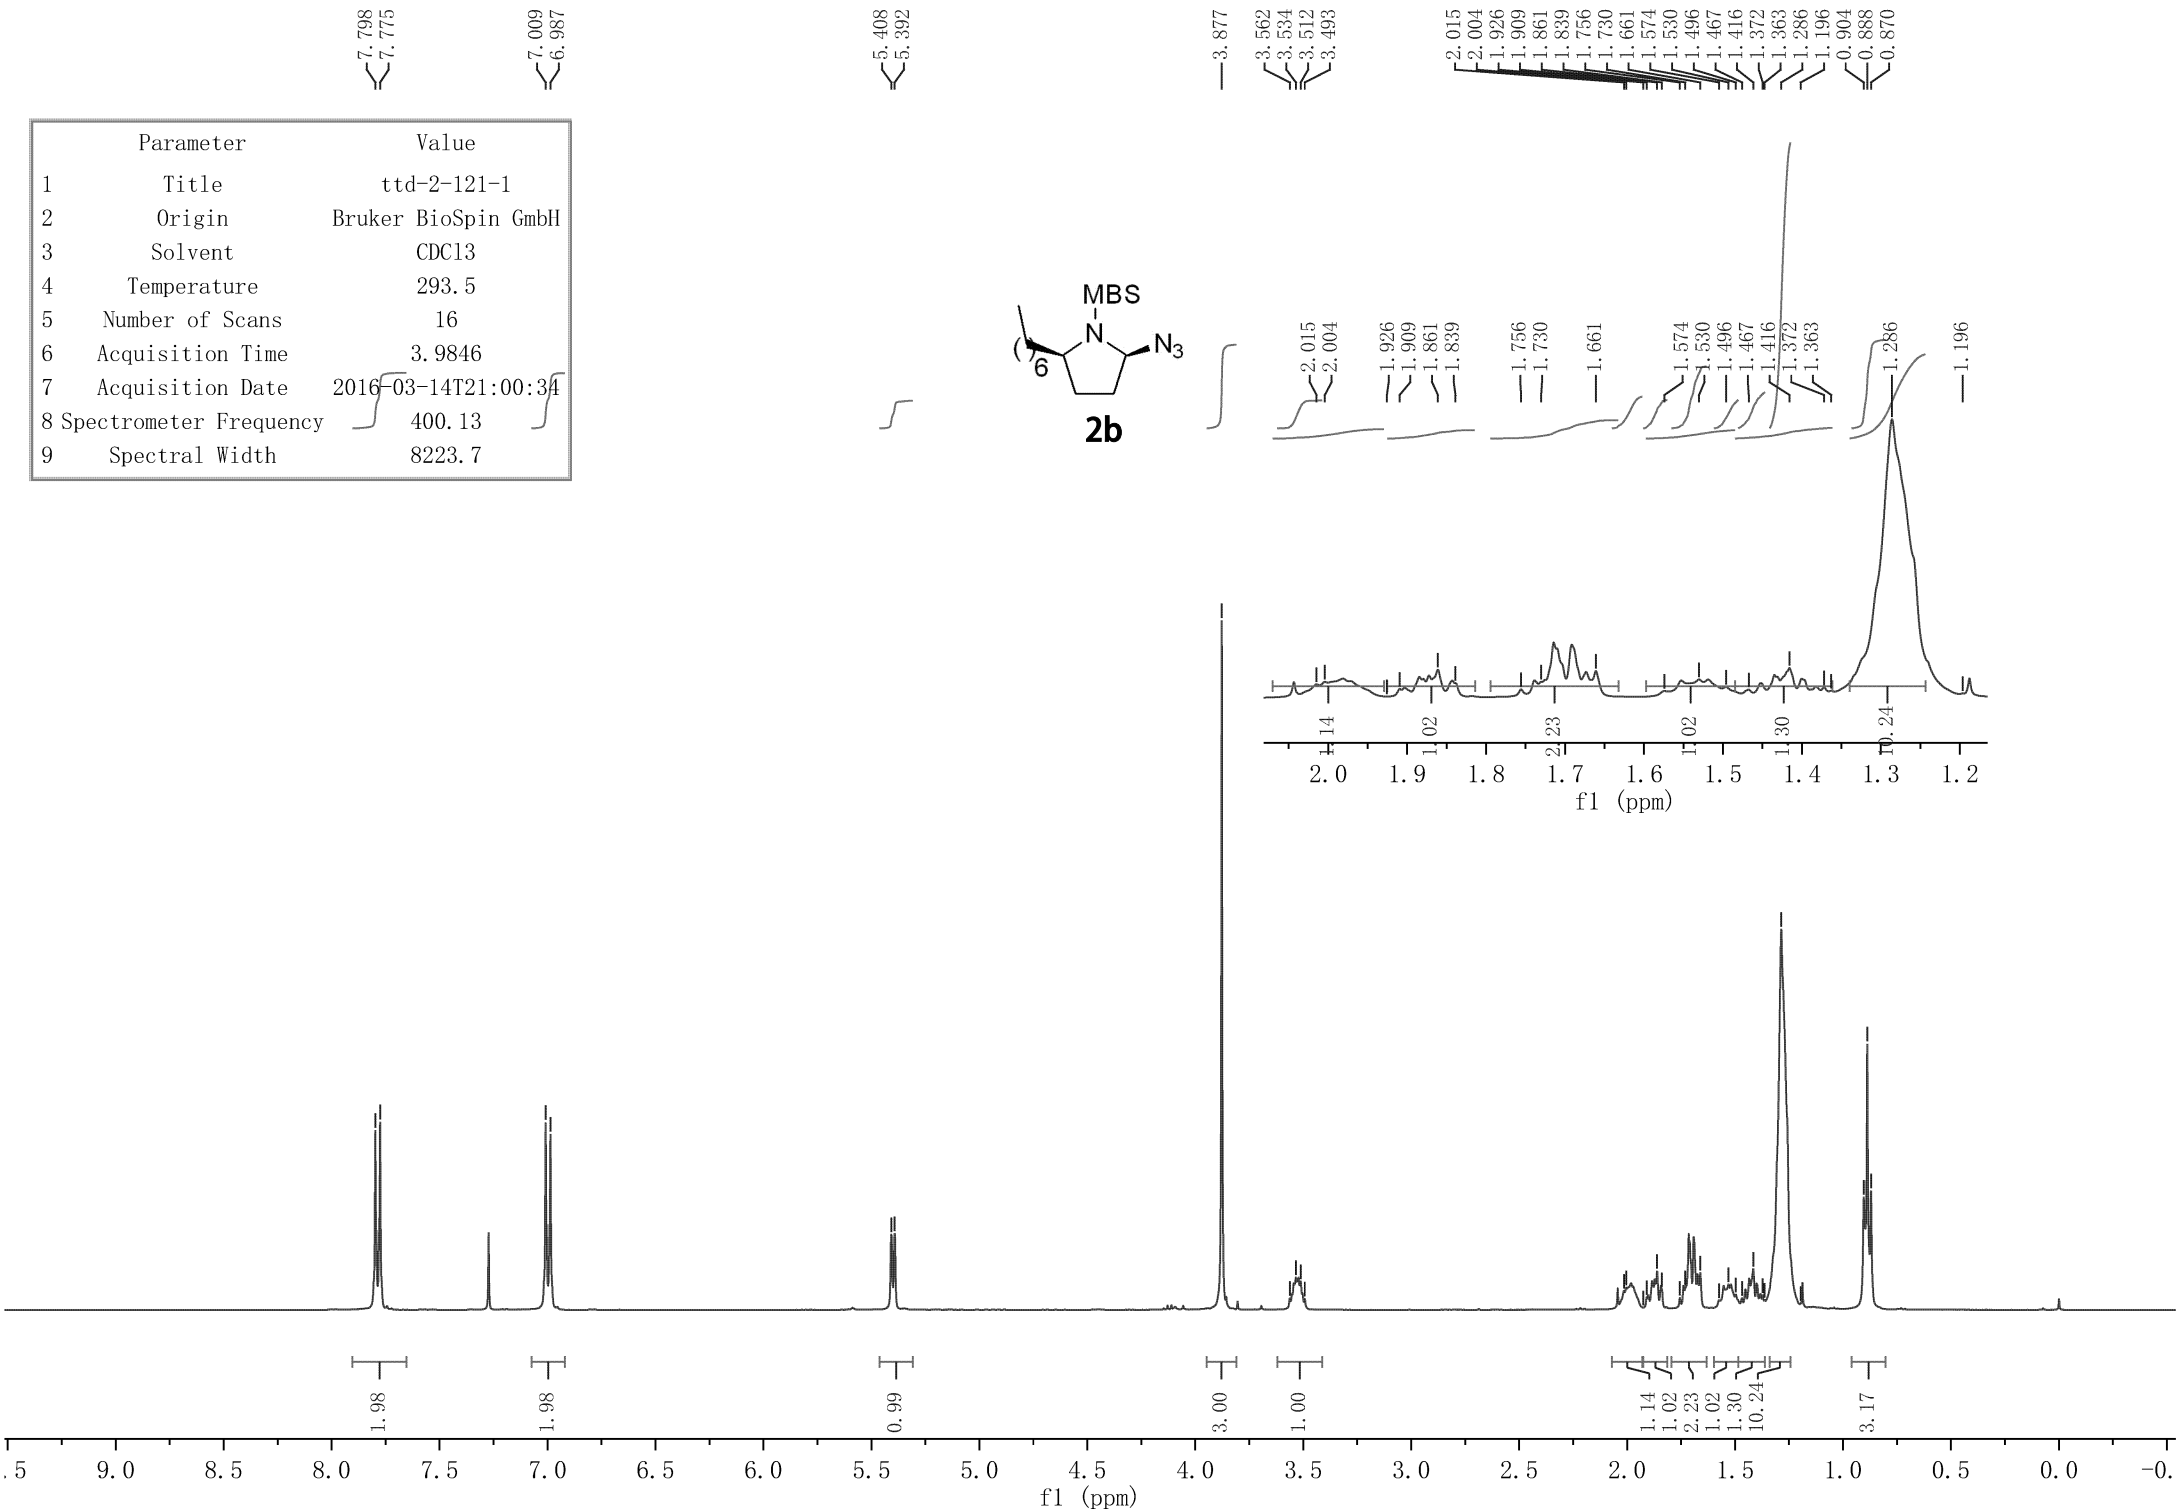

|   | Parameter              | Value               |
|---|------------------------|---------------------|
| 1 | Title                  | ttd-2-121-1-c       |
| 2 | Origin                 | Bruker BioSpin GmbH |
| 3 | Solvent                | CDC13               |
| 4 | Temperature            | 293.6               |
| 5 | Number of Scans        | 38                  |
| 6 | Acquisition Time       | 1.3631              |
| 7 | Acquisition Date       | 2016-03-14T21:03:40 |
| 8 | Spectrometer Frequency | 100.61              |
| 9 | Spectral Width         | 24038.5             |

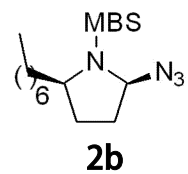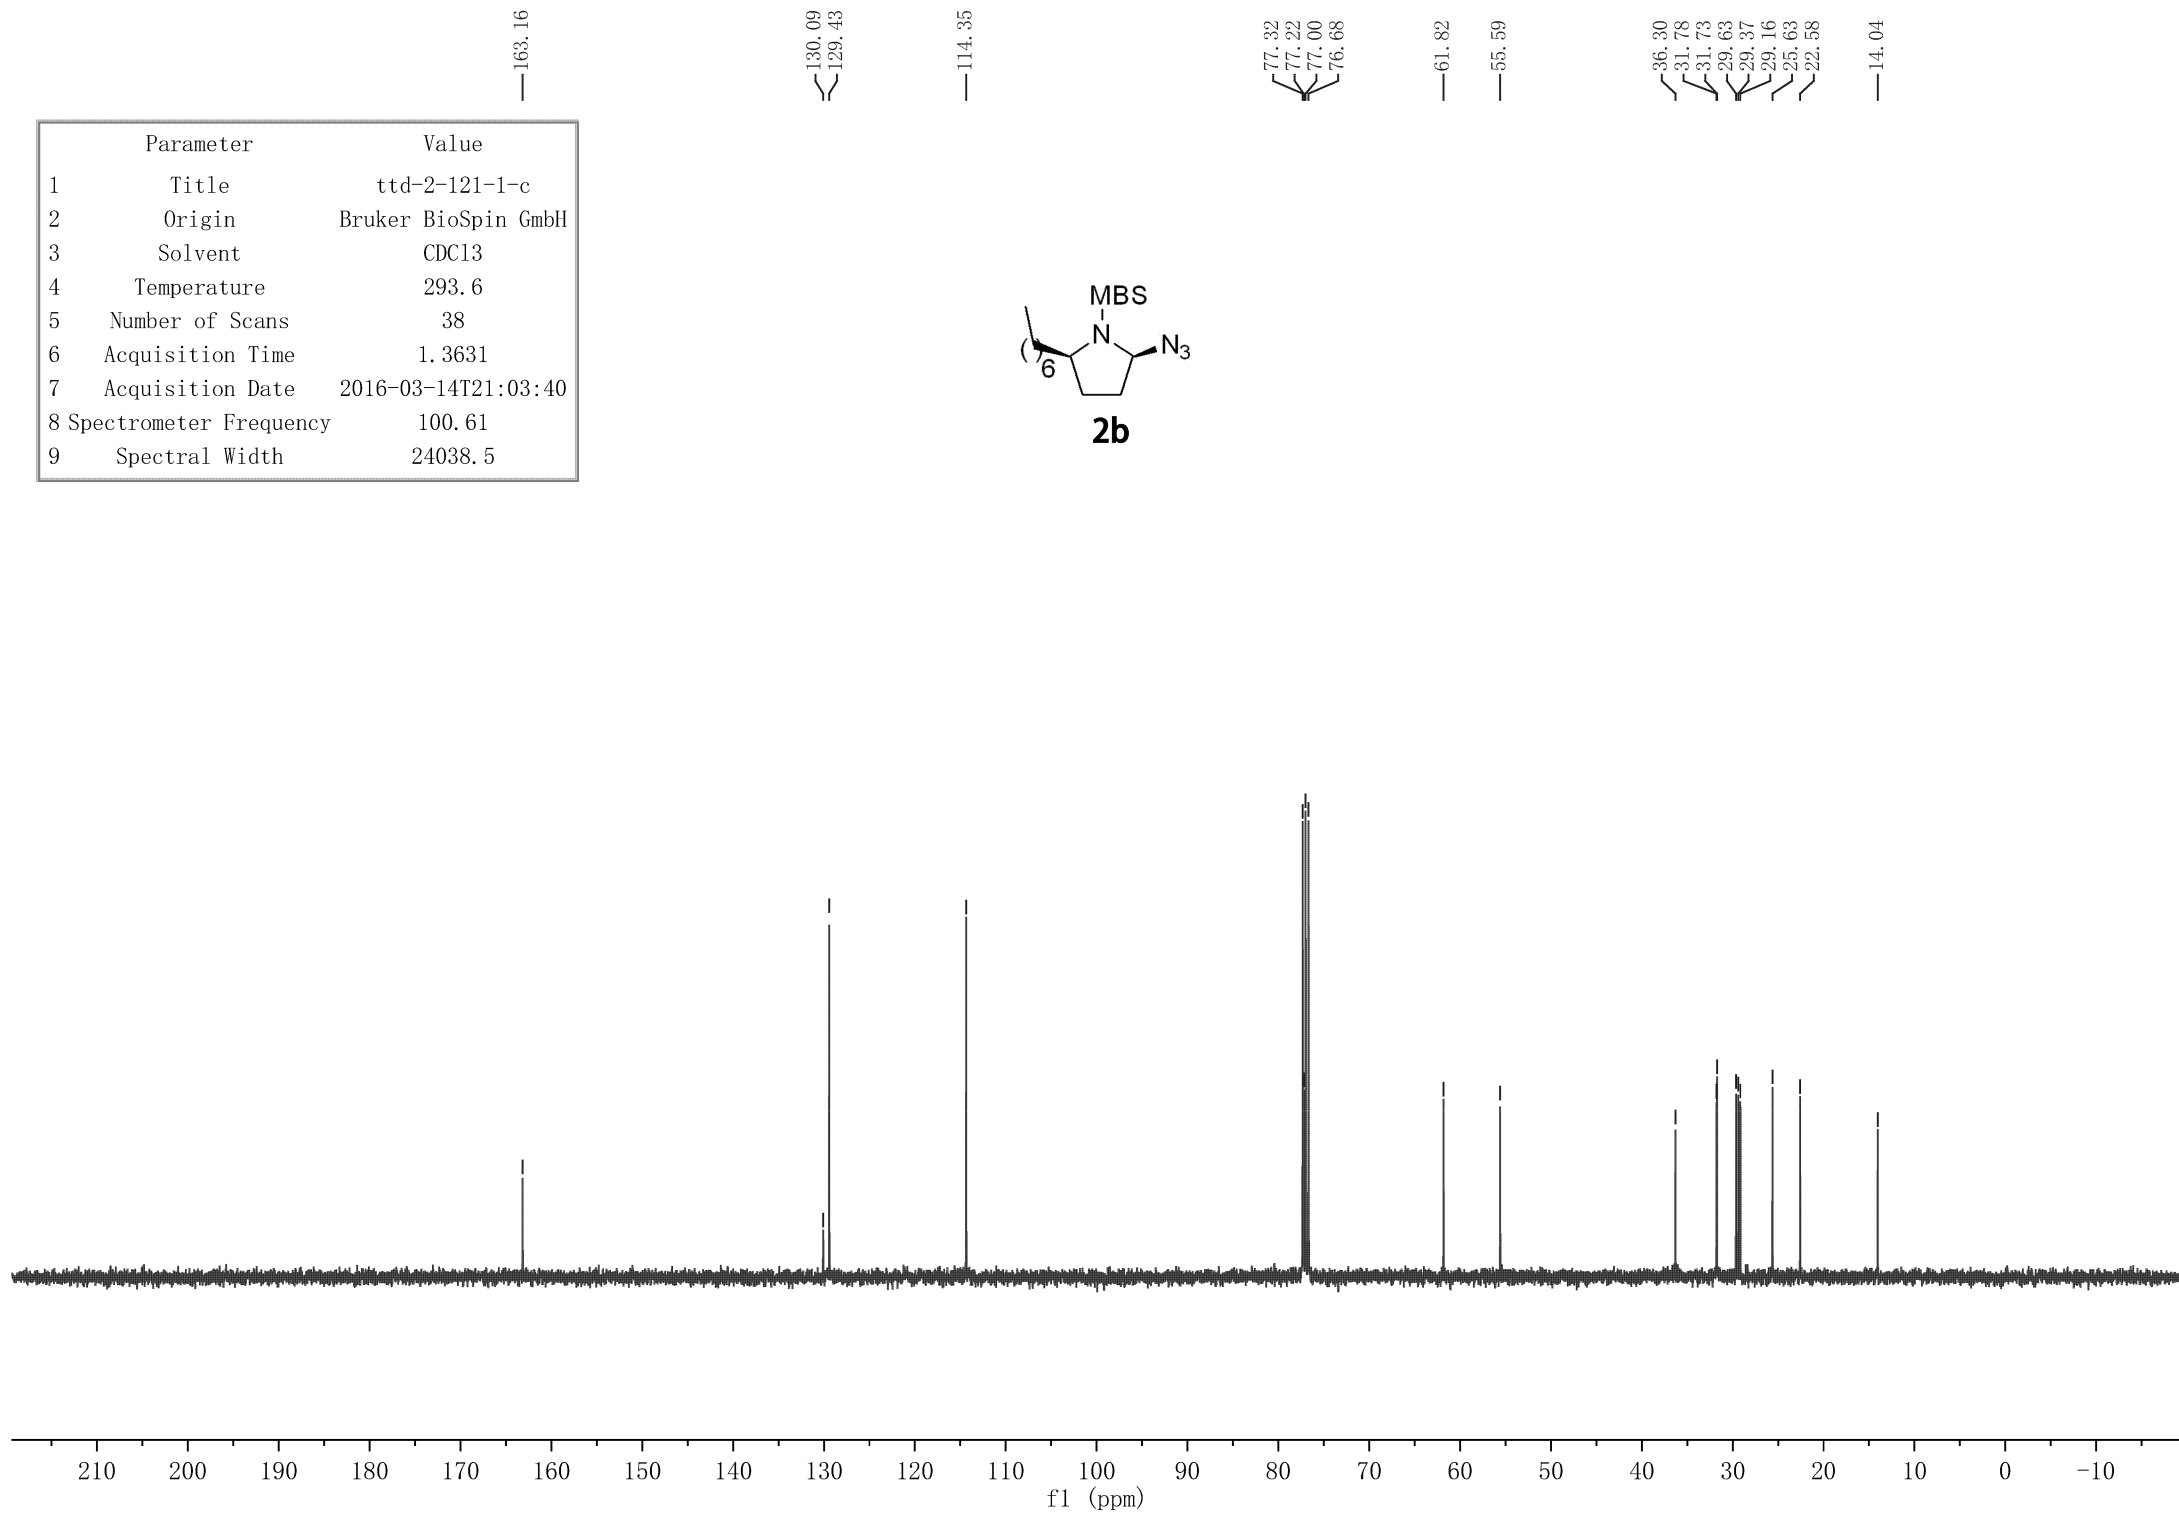

|   | Parameter              | Value               |
|---|------------------------|---------------------|
| 1 | Title                  | ttd-1-117           |
| 2 | Origin                 | Bruker BioSpin GmbH |
| 3 | Solvent                | CDC13               |
| 4 | Temperature            | 299.9               |
| 5 | Number of Scans        | 13                  |
| 6 | Acquisition Time       | 3.9846              |
| 7 | Acquisition Date       | 2015-09-26T08:23:36 |
| 8 | Spectrometer Frequency | 400.13              |
| 9 | Spectral Width         | 8223.7              |

7.619  
7.599  
7.317  
7.297  
7.278  
7.253  
7.225  
7.211  
7.192

5.420  
5.407

3.534  
3.506  
3.485  
3.465  
2.794  
2.747  
2.722  
2.626  
2.584  
2.568  
2.549  
2.444  
2.410  
2.376  
2.357  
1.937  
1.869  
1.846  
1.778  
1.702  
1.673  
1.620  
1.371  
1.339

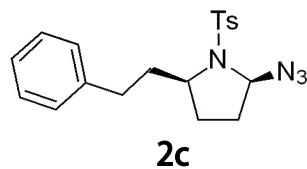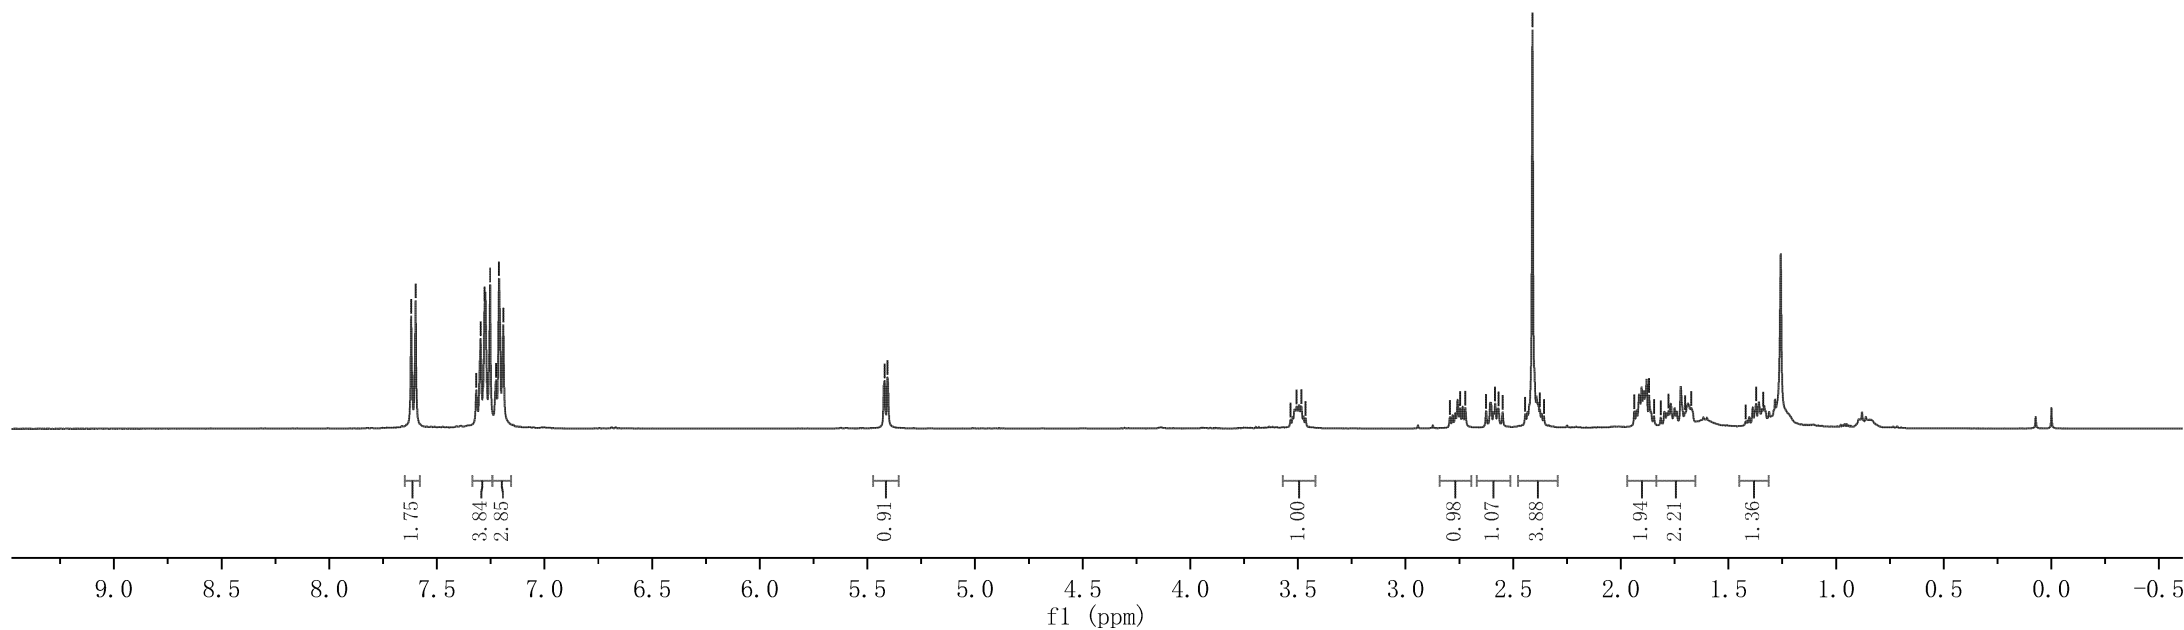

|   | Parameter              | Value               |
|---|------------------------|---------------------|
| 1 | Title                  | ttd-1-117-c13       |
| 2 | Origin                 | Bruker BioSpin GmbH |
| 3 | Solvent                | CDC13               |
| 4 | Temperature            | 299.8               |
| 5 | Number of Scans        | 107                 |
| 6 | Acquisition Time       | 1.3631              |
| 7 | Acquisition Date       | 2015-09-26T08:26:16 |
| 8 | Spectrometer Frequency | 100.61              |
| 9 | Spectral Width         | 24038.5             |

143.97  
141.14  
135.19  
129.85  
128.41  
127.39  
125.95

77.40  
77.32  
77.00  
76.68

61.01

37.61  
31.88  
31.77  
29.69

21.48

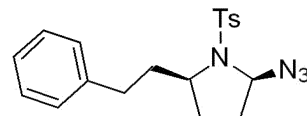

**2c**

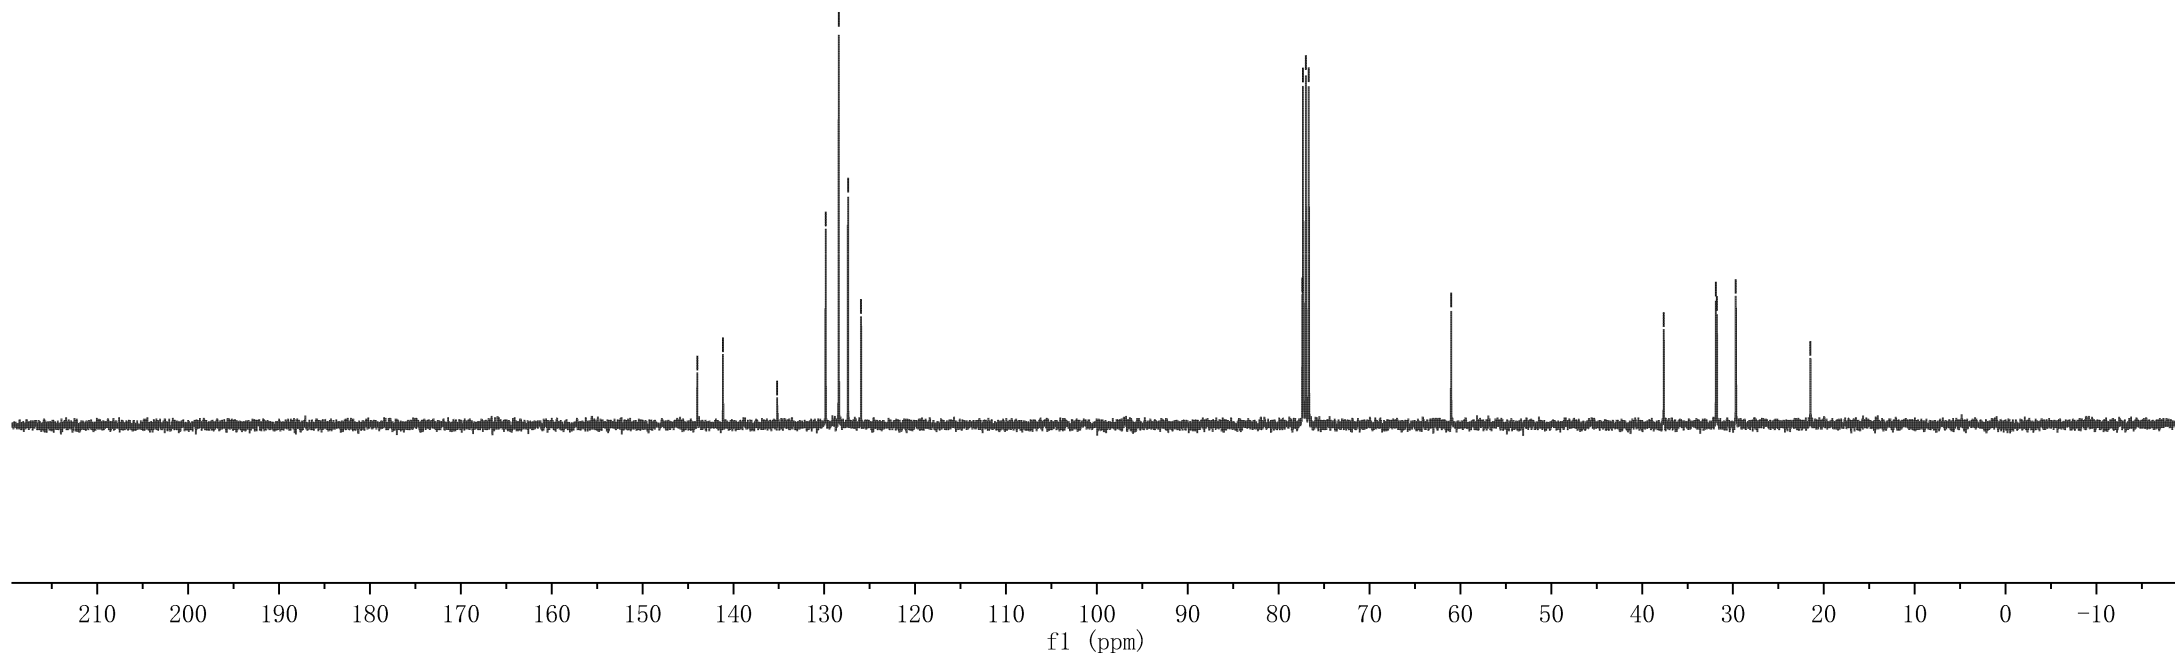

| Parameter                | Value               |
|--------------------------|---------------------|
| 1 Title                  | ttd-1-130           |
| 2 Origin                 | Bruker BioSpin GmbH |
| 3 Solvent                | CDC13               |
| 4 Temperature            | 299.2               |
| 5 Number of Scans        | 8                   |
| 6 Acquisition Time       | 3.9846              |
| 7 Acquisition Date       | 2015-10-07T10:22:46 |
| 8 Spectrometer Frequency | 400.13              |
| 9 Spectral Width         | 8223.7              |

7.742  
7.722

7.339  
7.319

5.449  
5.434

3.493  
3.475  
3.459  
3.441

2.436

1.919  
1.750  
1.684  
1.536  
1.406  
1.373  
1.315  
1.283  
1.198  
1.089  
1.034  
0.975  
0.894

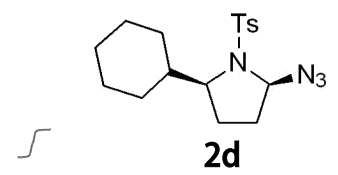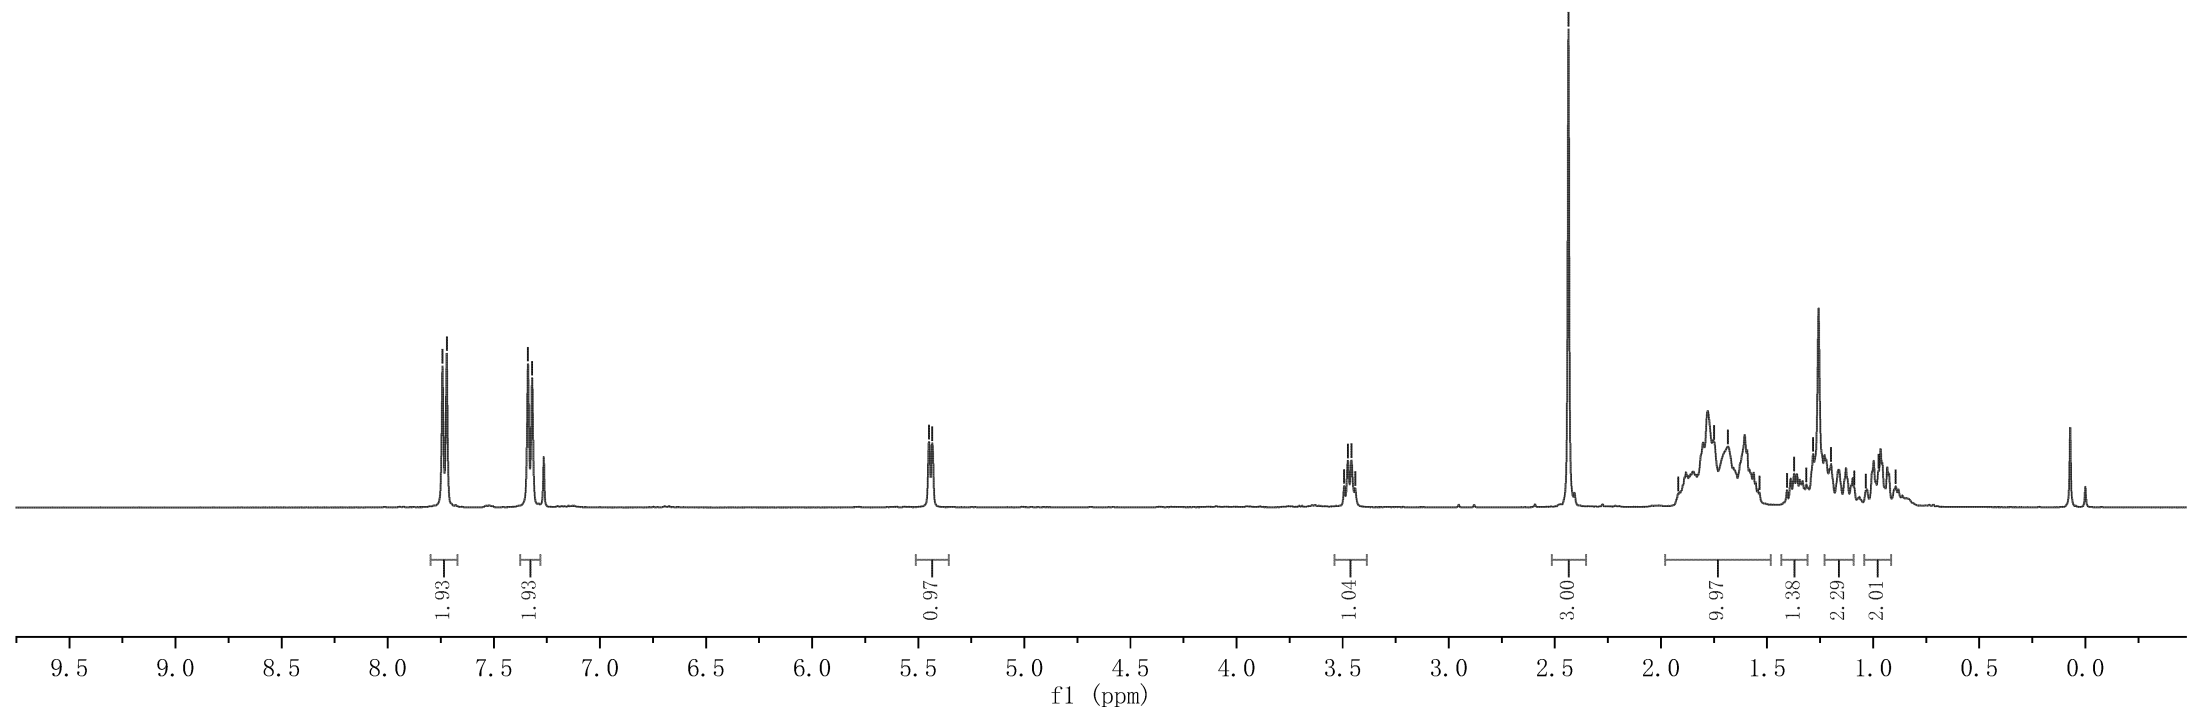

|   | Parameter              | Value               |
|---|------------------------|---------------------|
| 1 | Title                  | ttd-1-130-c13       |
| 2 | Origin                 | Bruker BioSpin GmbH |
| 3 | Solvent                | CDC13               |
| 4 | Temperature            | 299.3               |
| 5 | Number of Scans        | 74                  |
| 6 | Acquisition Time       | 1.3631              |
| 7 | Acquisition Date       | 2015-10-07T10:25:21 |
| 8 | Spectrometer Frequency | 100.61              |
| 9 | Spectral Width         | 24038.5             |

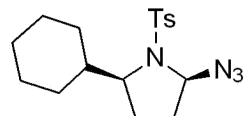

**2d**

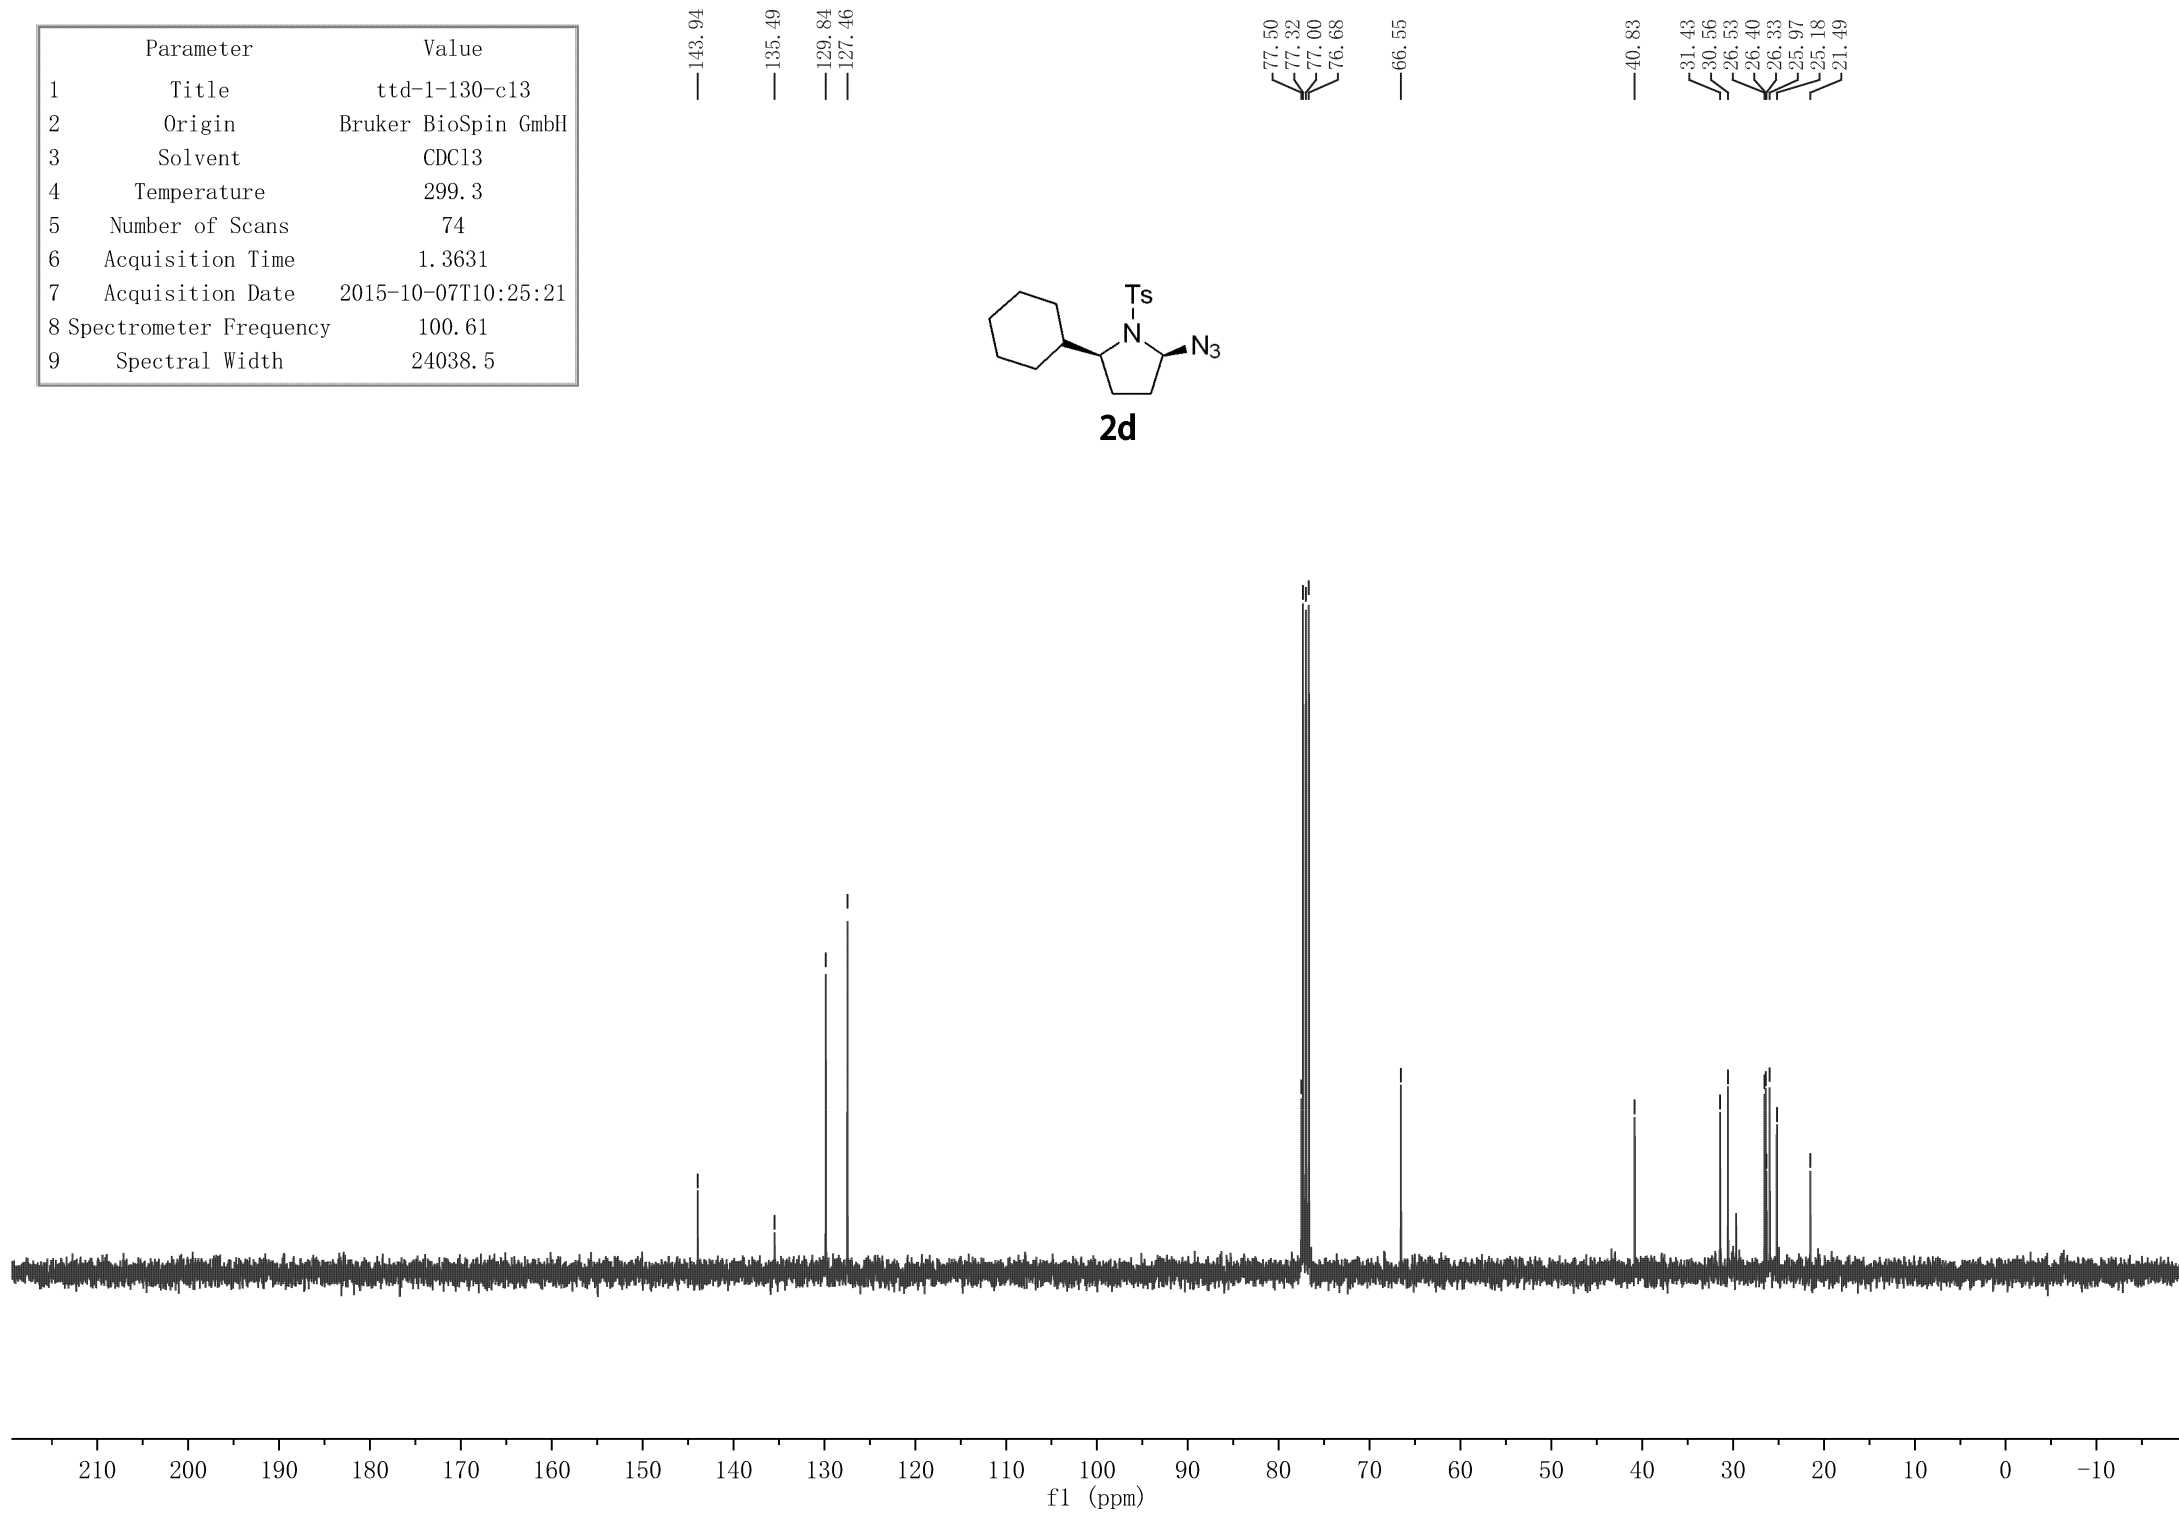

7.534  
7.513  
7.269  
7.249  
7.217  
7.196  
7.175  
7.155

5.770  
5.756

4.630  
4.613  
4.608  
4.590

2.365  
2.278  
2.255  
2.223  
2.205  
2.071  
2.017  
2.002  
1.970  
1.876  
1.860  
1.828  
1.769  
1.753  
1.722  
1.674

|   | Parameter              | Value               |
|---|------------------------|---------------------|
| 1 | Title                  | ttd-1-100           |
| 2 | Origin                 | Bruker BioSpin GmbH |
| 3 | Solvent                | CDC13               |
| 4 | Temperature            | 296.1               |
| 5 | Number of Scans        | 18                  |
| 6 | Acquisition Time       | 3.9846              |
| 7 | Acquisition Date       | 2015-09-12T09:29:26 |
| 8 | Spectrometer Frequency | 400.13              |
| 9 | Spectral Width         | 8223.7              |

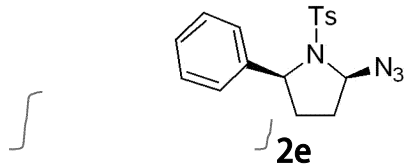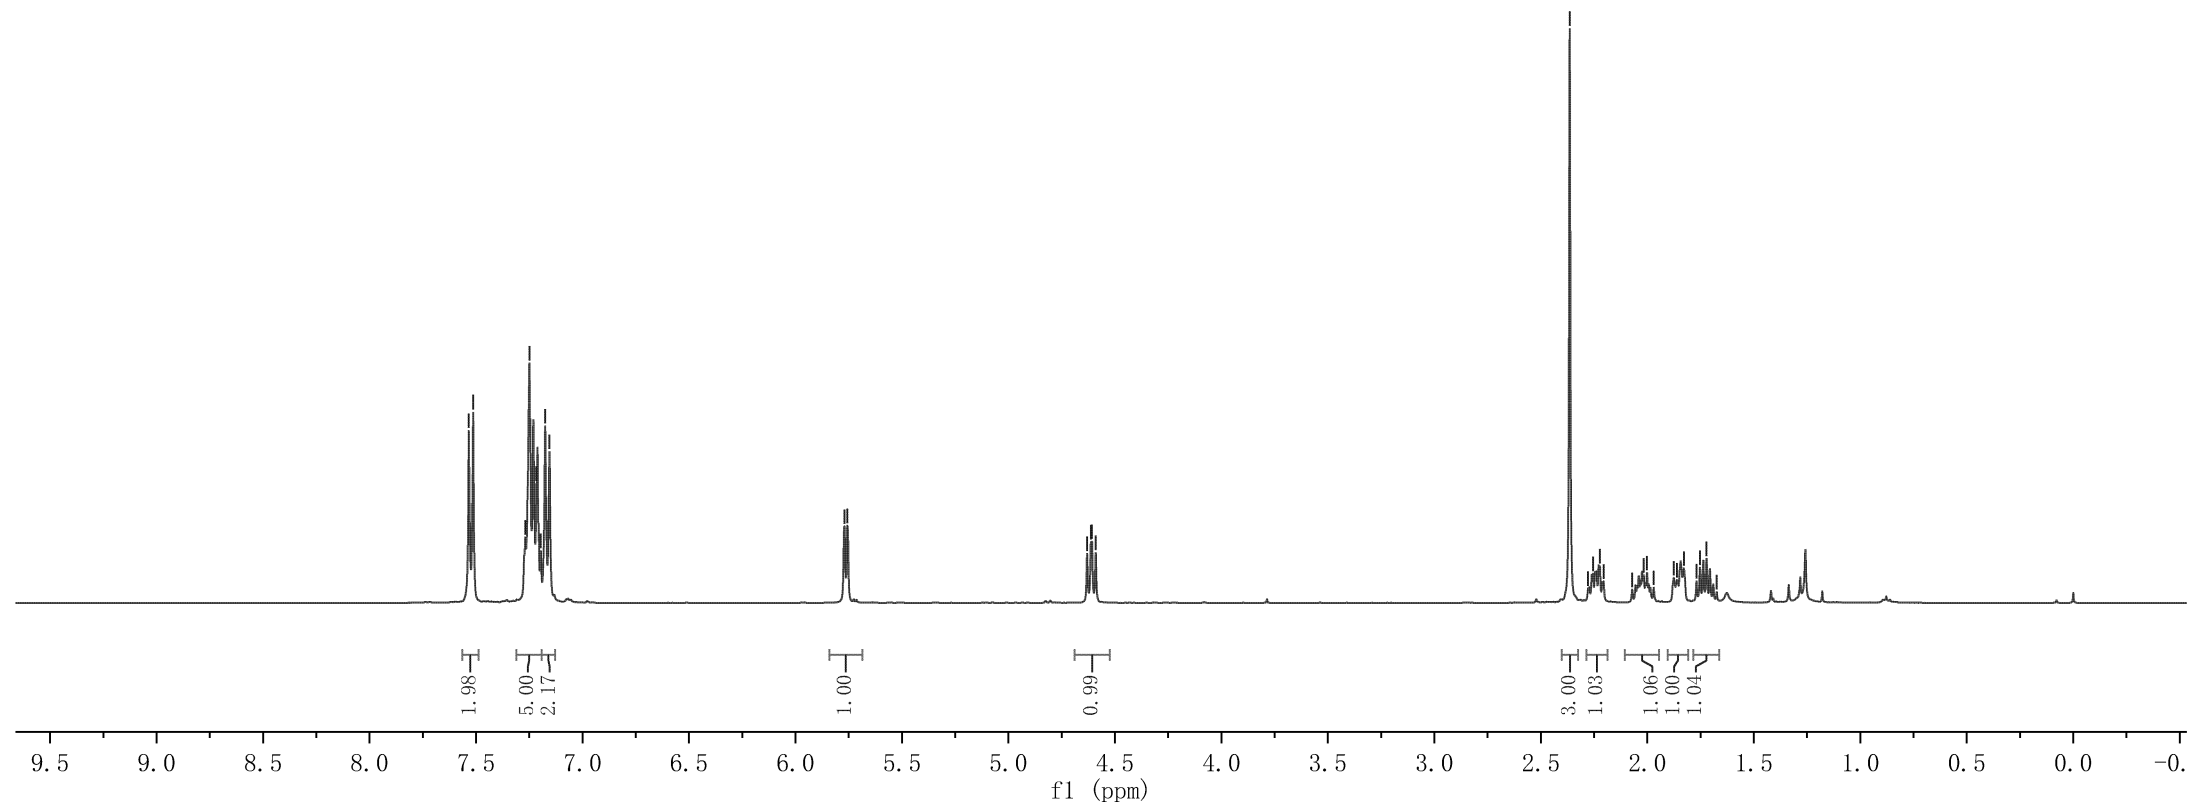

|   | Parameter              | Value               |
|---|------------------------|---------------------|
| 1 | Title                  | ttd-1-100-c13       |
| 2 | Origin                 | Bruker BioSpin GmbH |
| 3 | Solvent                | CDC13               |
| 4 | Temperature            | 296.0               |
| 5 | Number of Scans        | 21                  |
| 6 | Acquisition Time       | 1.3631              |
| 7 | Acquisition Date       | 2015-09-12T09:32:59 |
| 8 | Spectrometer Frequency | 100.61              |
| 9 | Spectral Width         | 24038.5             |

143.74  
140.80  
135.57  
129.46  
128.30  
127.47  
127.37  
126.76

77.60  
77.32  
77.00  
76.68  
65.25

34.89  
32.21

21.39

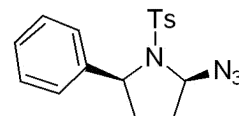

**2e**

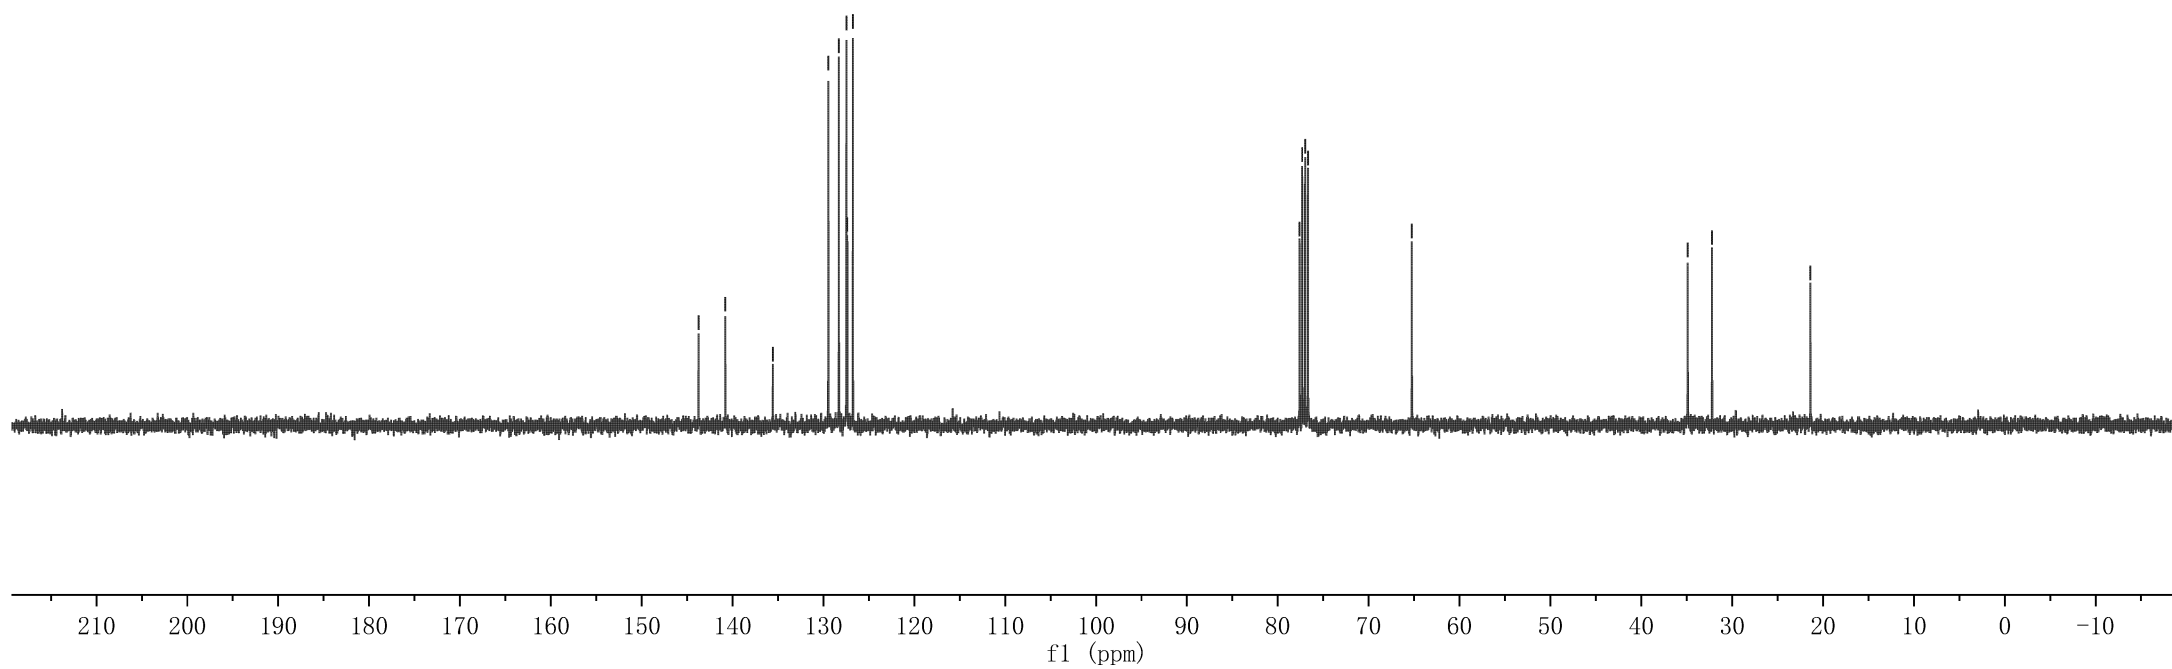

|   | Parameter              | Value               |
|---|------------------------|---------------------|
| 1 | Title                  | ttd-1-129           |
| 2 | Origin                 | Bruker BioSpin GmbH |
| 3 | Solvent                | CDC13               |
| 4 | Temperature            | 300.1               |
| 5 | Number of Scans        | 8                   |
| 6 | Acquisition Time       | 3.9846              |
| 7 | Acquisition Date       | 2015-10-06T16:30:43 |
| 8 | Spectrometer Frequency | 400.13              |
| 9 | Spectral Width         | 8223.7              |

7.533  
7.514  
7.177  
7.155  
7.133  
7.047  
7.028

5.762  
5.747

4.599  
4.580  
4.559

2.380  
2.305  
2.261  
2.228  
2.196  
2.078  
2.032  
1.978  
1.884  
1.869  
1.838  
1.777  
1.745  
1.682

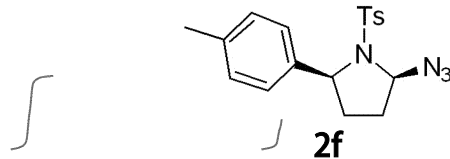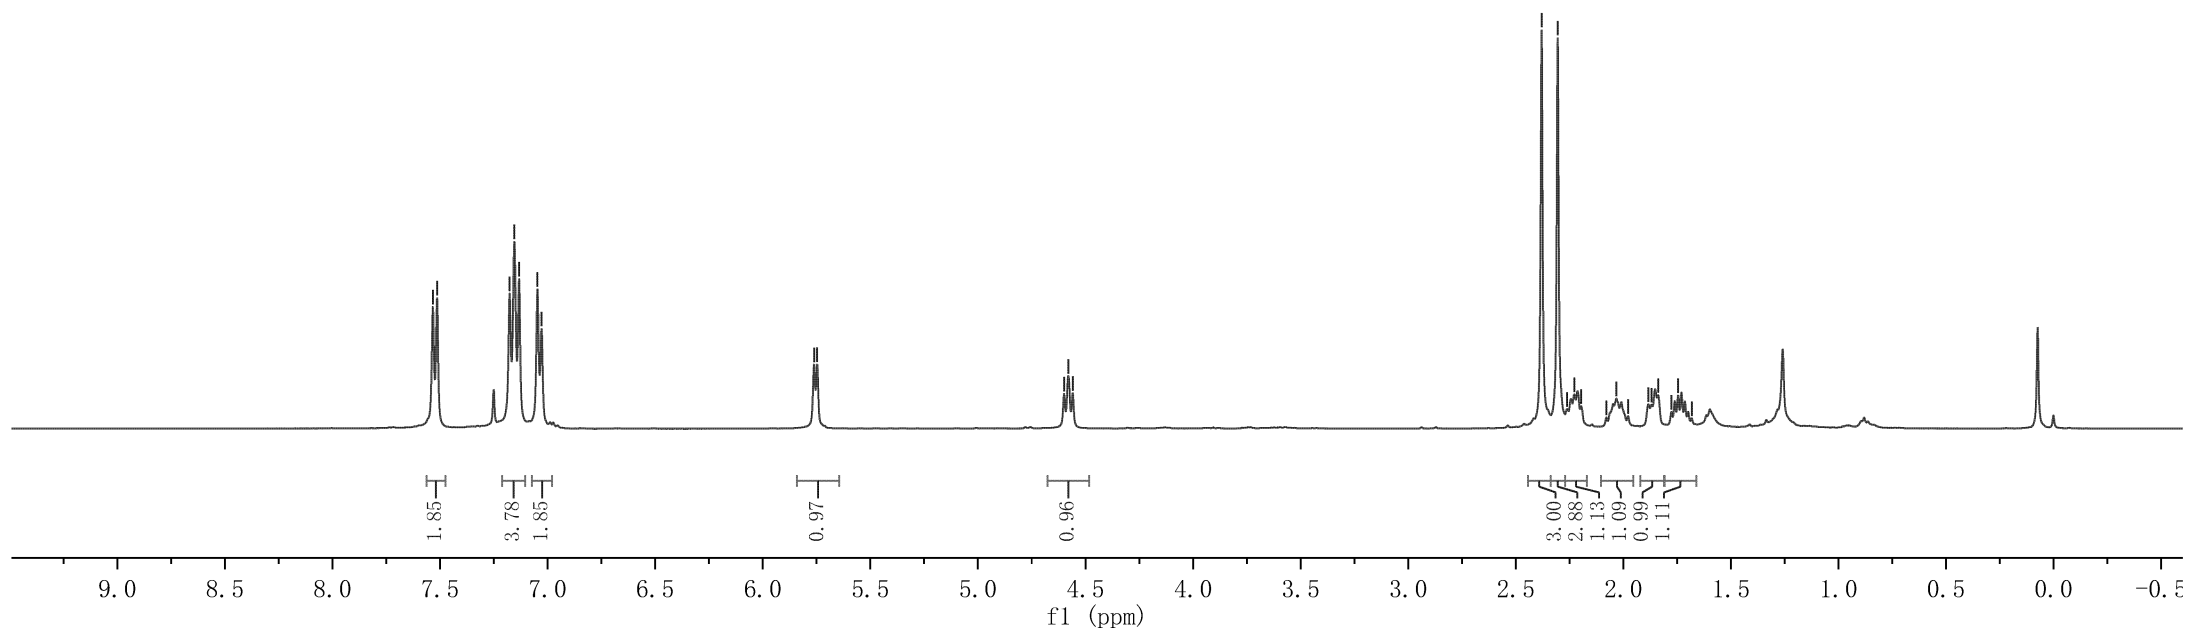

|   | Parameter              | Value               |
|---|------------------------|---------------------|
| 1 | Title                  | ttd-1-129-c13       |
| 2 | Origin                 | Bruker BioSpin GmbH |
| 3 | Solvent                | CDC13               |
| 4 | Temperature            | 300.1               |
| 5 | Number of Scans        | 28                  |
| 6 | Acquisition Time       | 1.3631              |
| 7 | Acquisition Date       | 2015-10-06T16:33:34 |
| 8 | Spectrometer Frequency | 100.61              |
| 9 | Spectral Width         | 24038.5             |

143.65  
137.76  
137.16  
135.82  
129.41  
129.02  
127.58  
126.81

77.56  
77.32  
77.00  
76.68  
65.14

34.87  
32.29  
21.43  
21.01

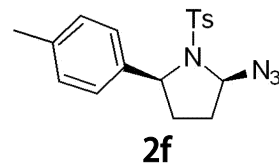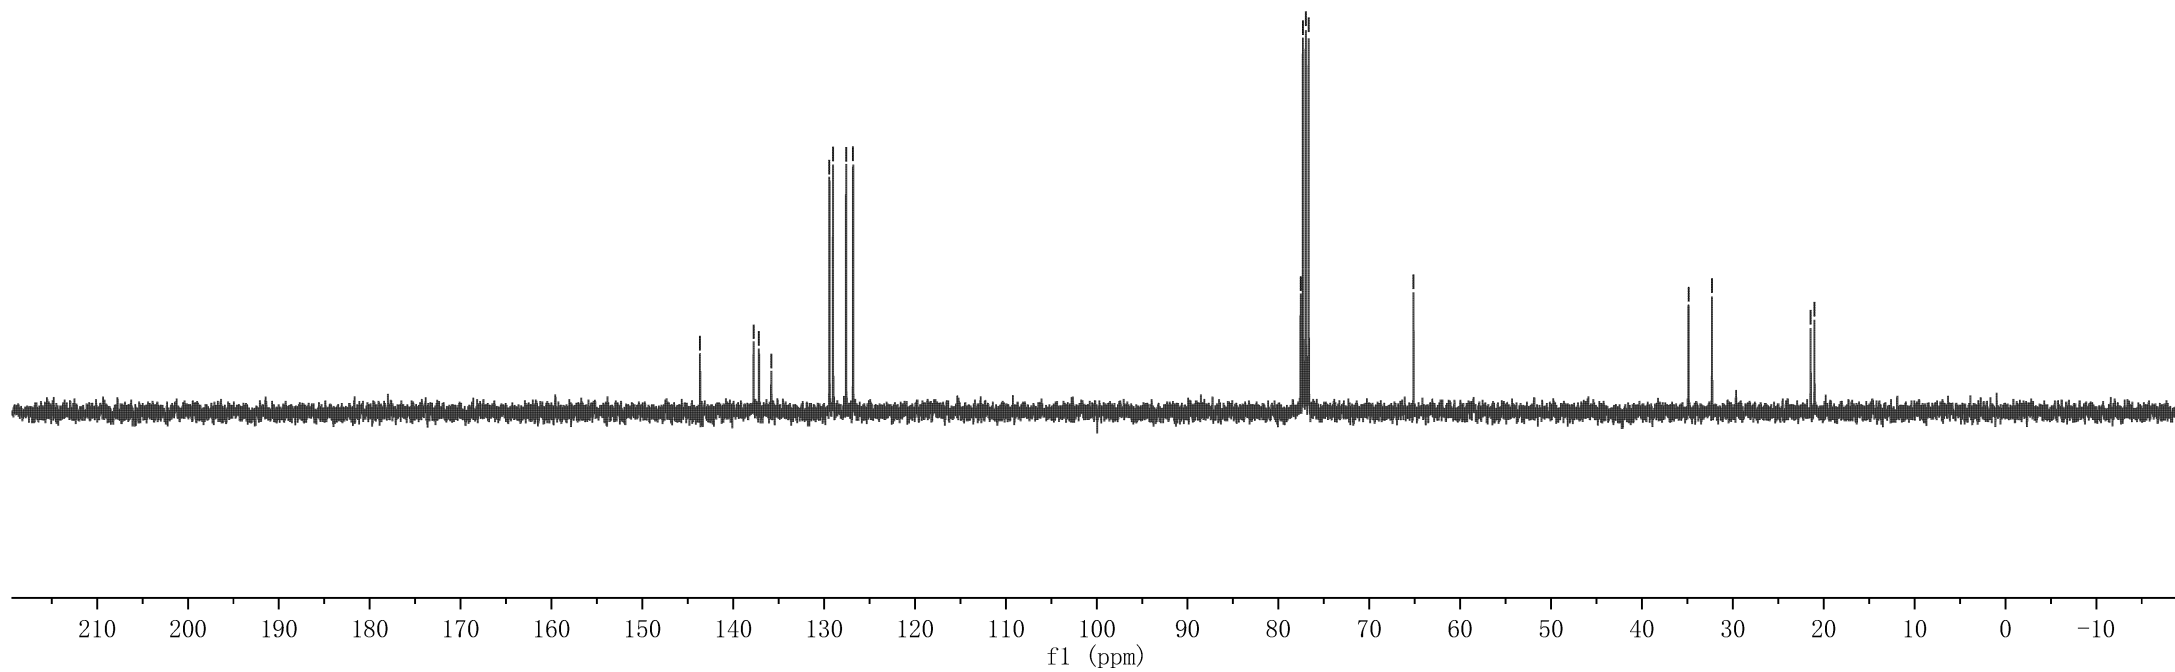

|   | Parameter              | Value               |
|---|------------------------|---------------------|
| 1 | Title                  | ttd-1-114           |
| 2 | Origin                 | Bruker BioSpin GmbH |
| 3 | Solvent                | CDC13               |
| 4 | Temperature            | 299.9               |
| 5 | Number of Scans        | 9                   |
| 6 | Acquisition Time       | 3.9846              |
| 7 | Acquisition Date       | 2015-09-24T21:06:14 |
| 8 | Spectrometer Frequency | 400.13              |
| 9 | Spectral Width         | 8223.7              |

7.517  
7.496  
7.174  
7.164  
7.152  
6.767  
6.745

5.768  
5.755

4.610  
4.593  
4.587  
4.569

3.770

2.373  
2.261  
2.206  
2.189  
2.074  
2.043  
1.973  
1.897  
1.864  
1.849  
1.801  
1.769  
1.706

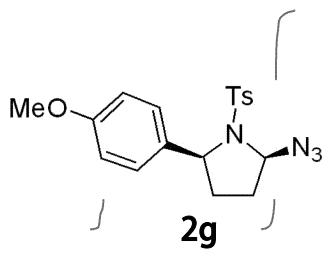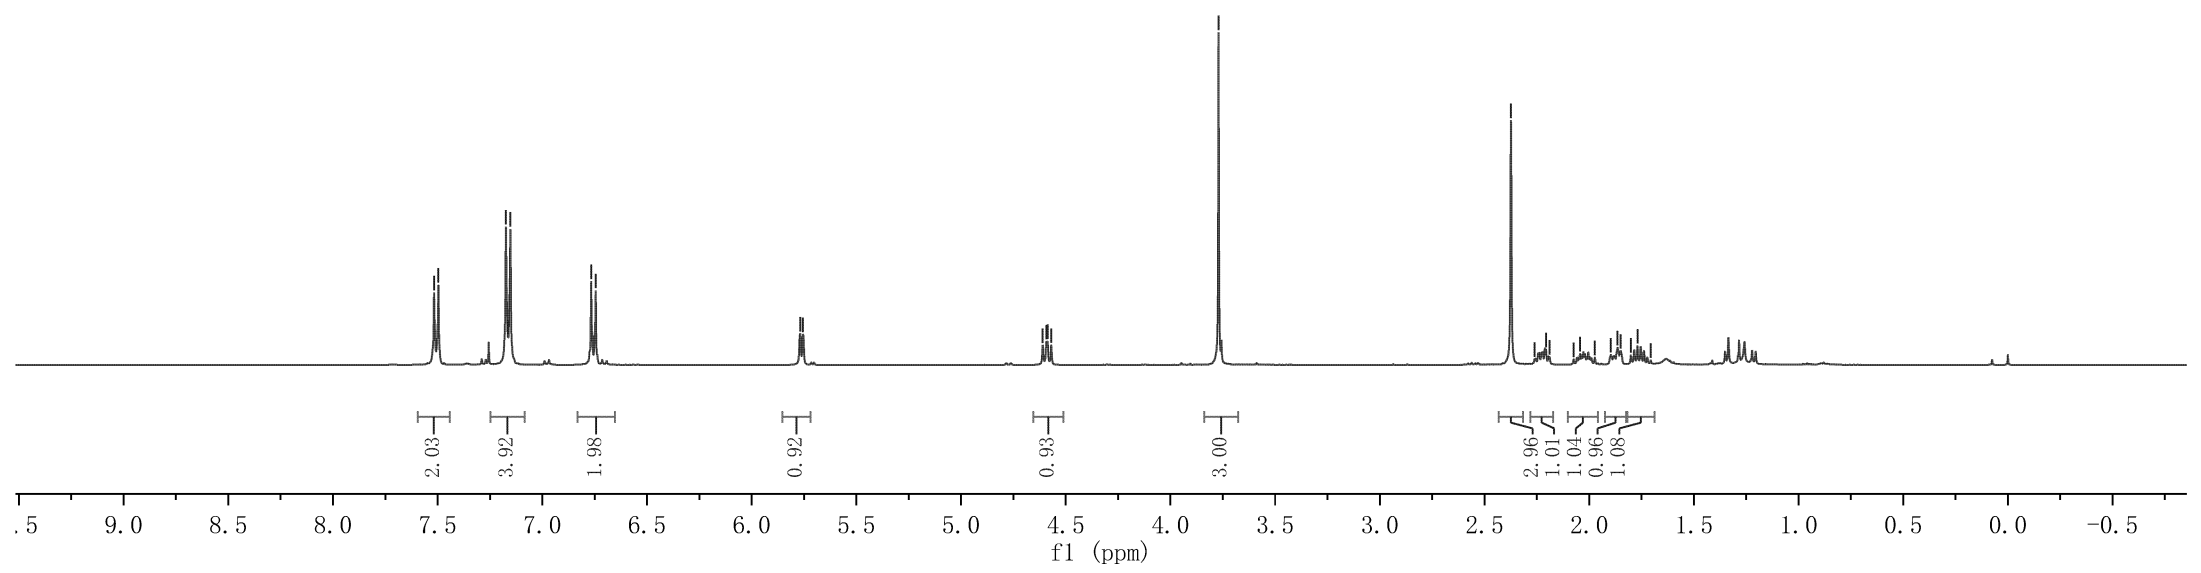

|   | Parameter              | Value               |
|---|------------------------|---------------------|
| 1 | Title                  | ttd-1-114-c13       |
| 2 | Origin                 | Bruker BioSpin GmbH |
| 3 | Solvent                | CDC13               |
| 4 | Temperature            | 300.1               |
| 5 | Number of Scans        | 21                  |
| 6 | Acquisition Time       | 1.3631              |
| 7 | Acquisition Date       | 2015-09-24T21:09:12 |
| 8 | Spectrometer Frequency | 100.61              |
| 9 | Spectral Width         | 24038.5             |

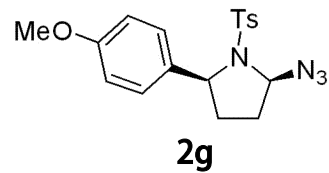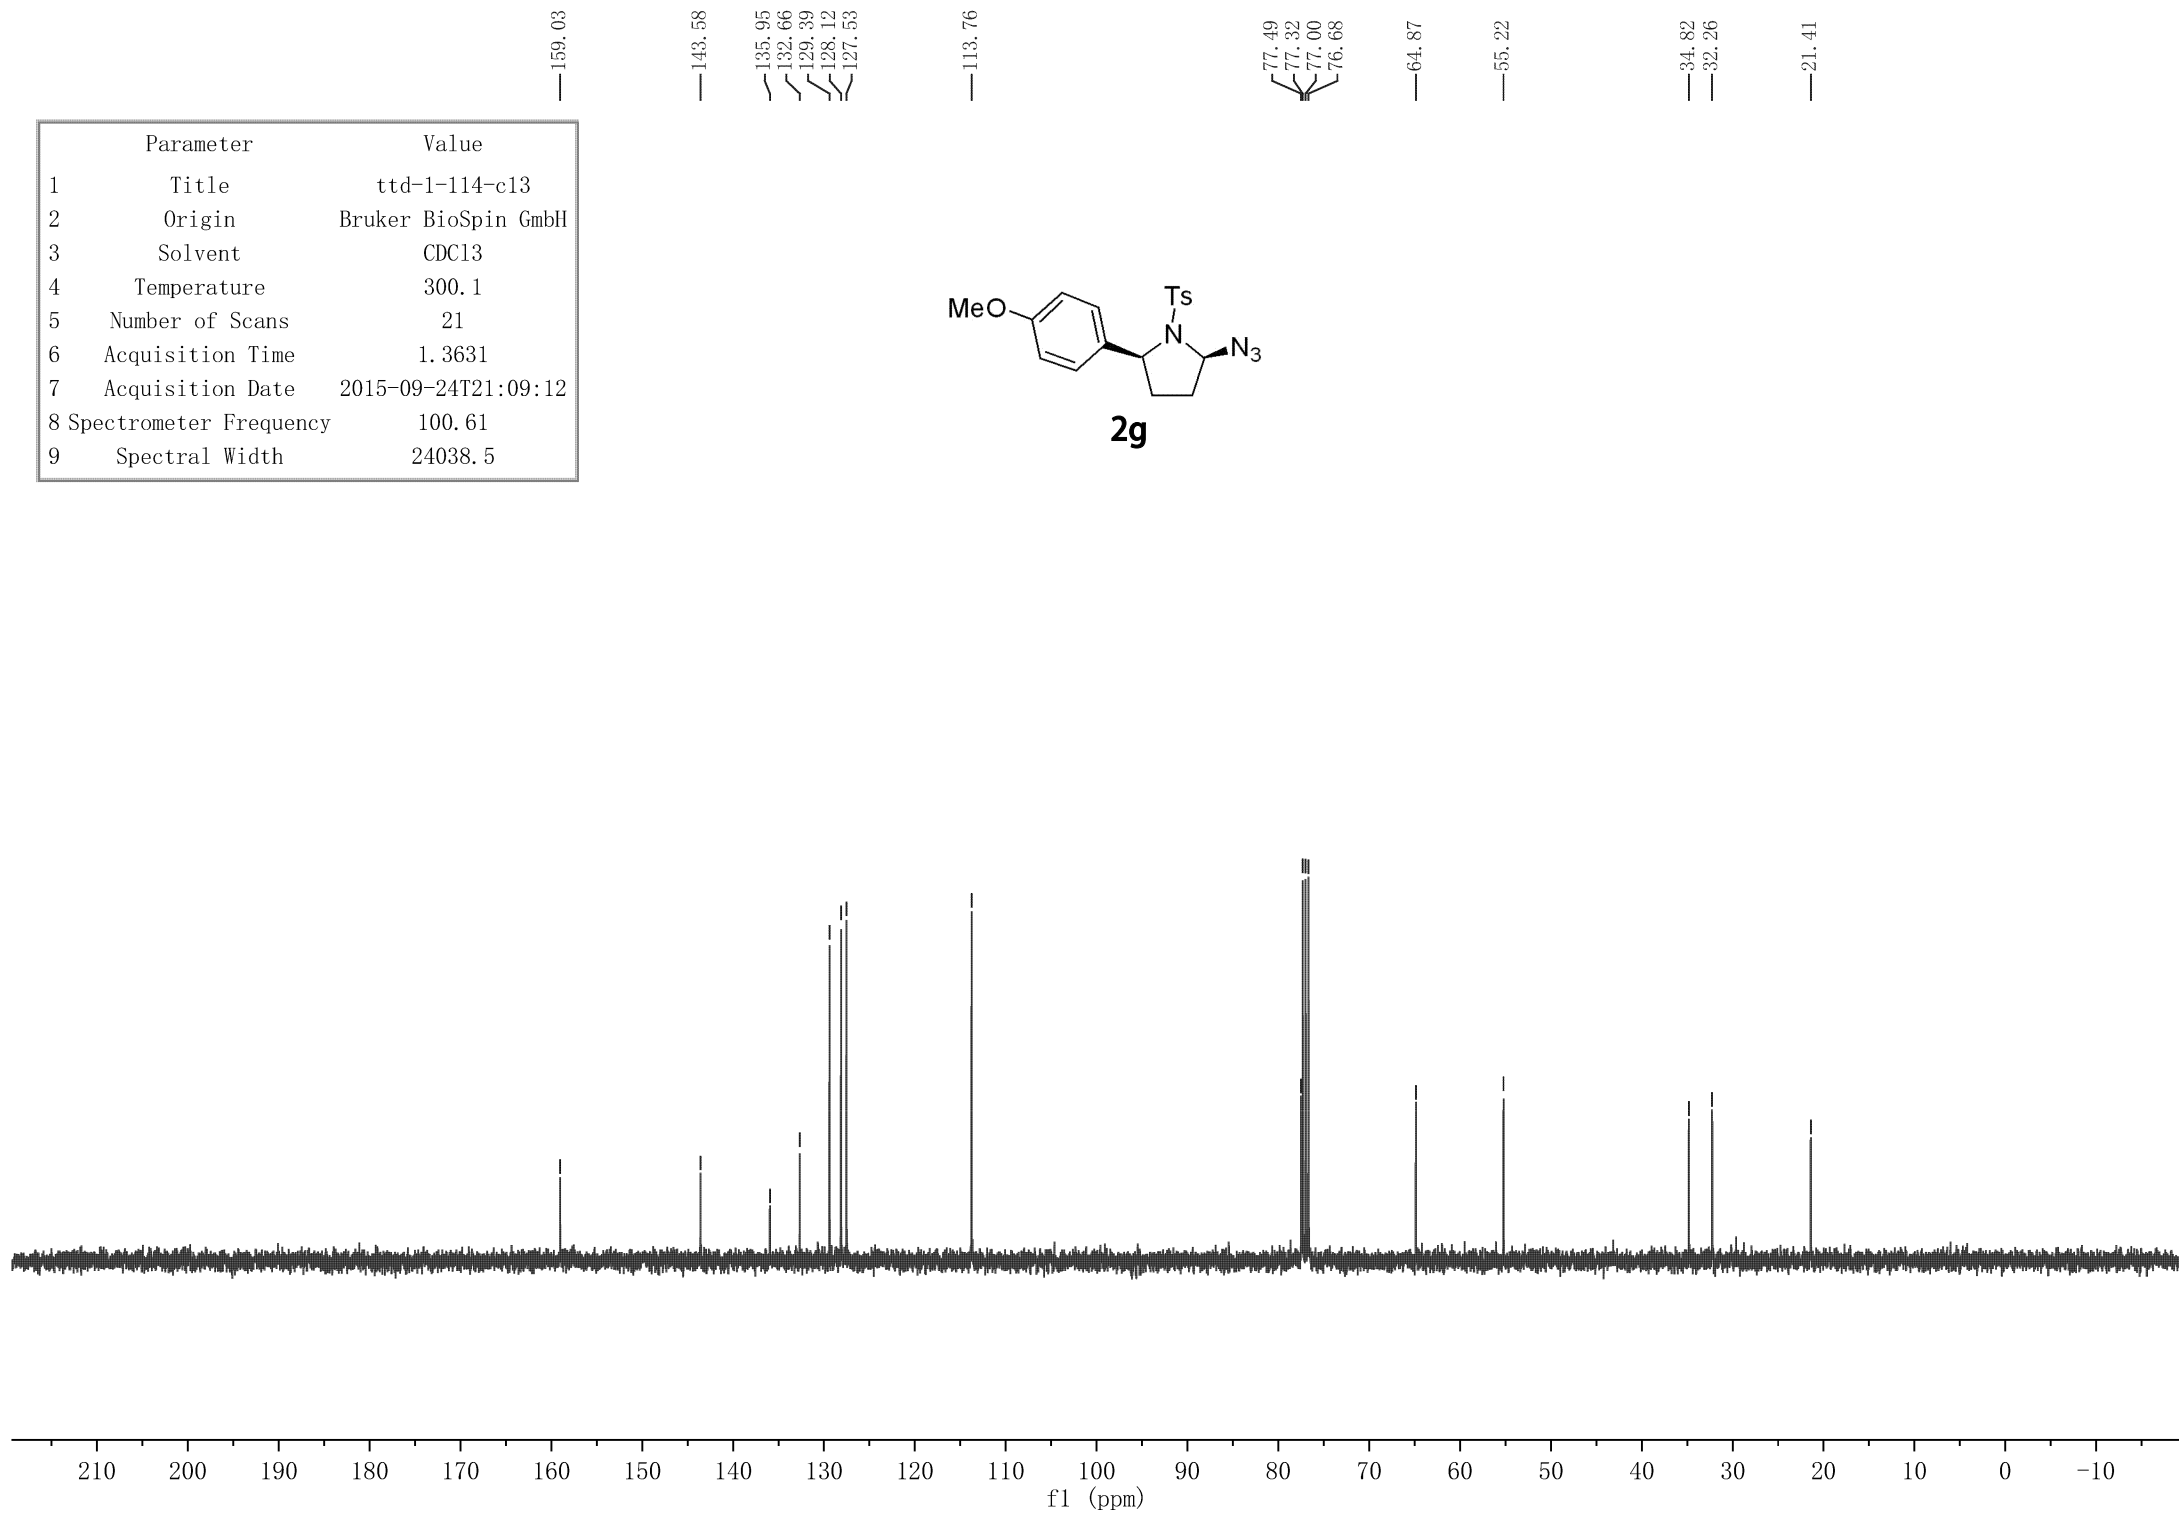

|   | Parameter              | Value               |
|---|------------------------|---------------------|
| 1 | Title                  | ttd-1-128           |
| 2 | Origin                 | Bruker BioSpin GmbH |
| 3 | Solvent                | CDC13               |
| 4 | Temperature            | 300.0               |
| 5 | Number of Scans        | 7                   |
| 6 | Acquisition Time       | 3.9846              |
| 7 | Acquisition Date       | 2015-10-07T17:23:01 |
| 8 | Spectrometer Frequency | 400.13              |
| 9 | Spectral Width         | 8223.7              |

7.527  
7.507  
7.218  
7.197  
6.928  
6.907  
6.885

5.781  
5.766

4.632  
4.612  
4.592

2.384  
2.285  
2.239  
2.223  
2.048  
2.001  
1.947  
1.901  
1.885  
1.854  
1.805  
1.773  
1.710

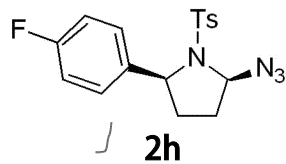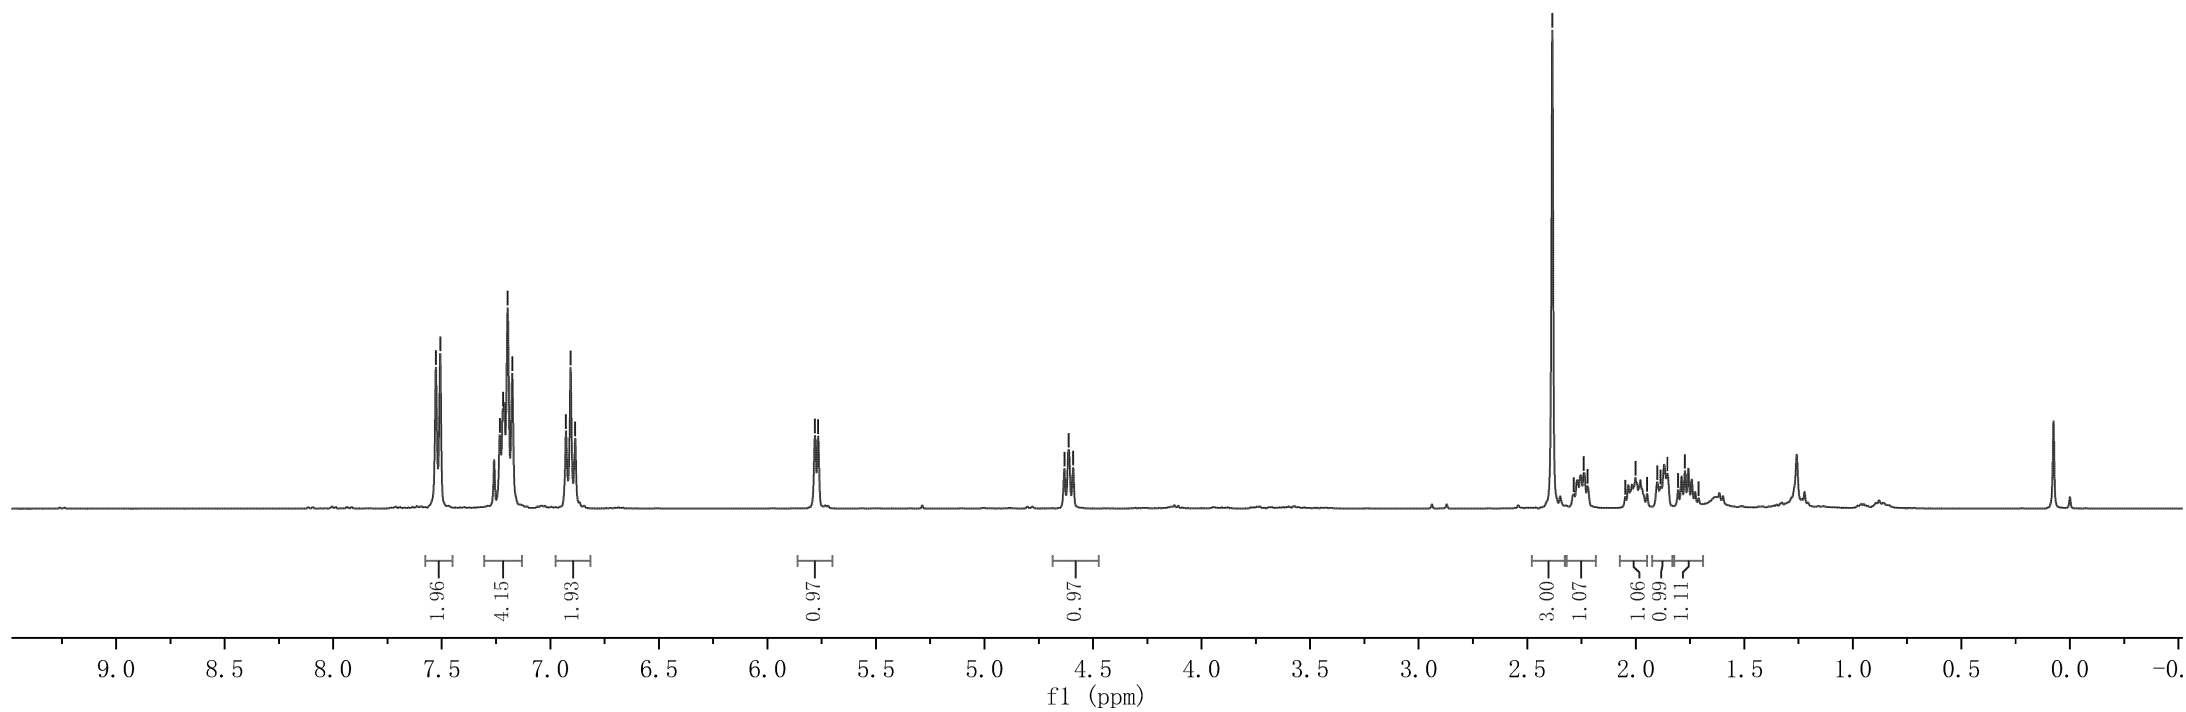

|   | Parameter              | Value               |
|---|------------------------|---------------------|
| 1 | Title                  | ttd-1-128-c13       |
| 2 | Origin                 | Bruker BioSpin GmbH |
| 3 | Solvent                | CDCl3               |
| 4 | Temperature            | 299.9               |
| 5 | Number of Scans        | 25                  |
| 6 | Acquisition Time       | 1.3631              |
| 7 | Acquisition Date       | 2015-10-07T17:26:50 |
| 8 | Spectrometer Frequency | 100.61              |
| 9 | Spectral Width         | 24038.5             |

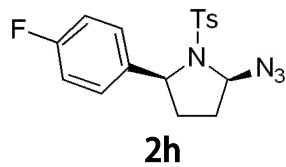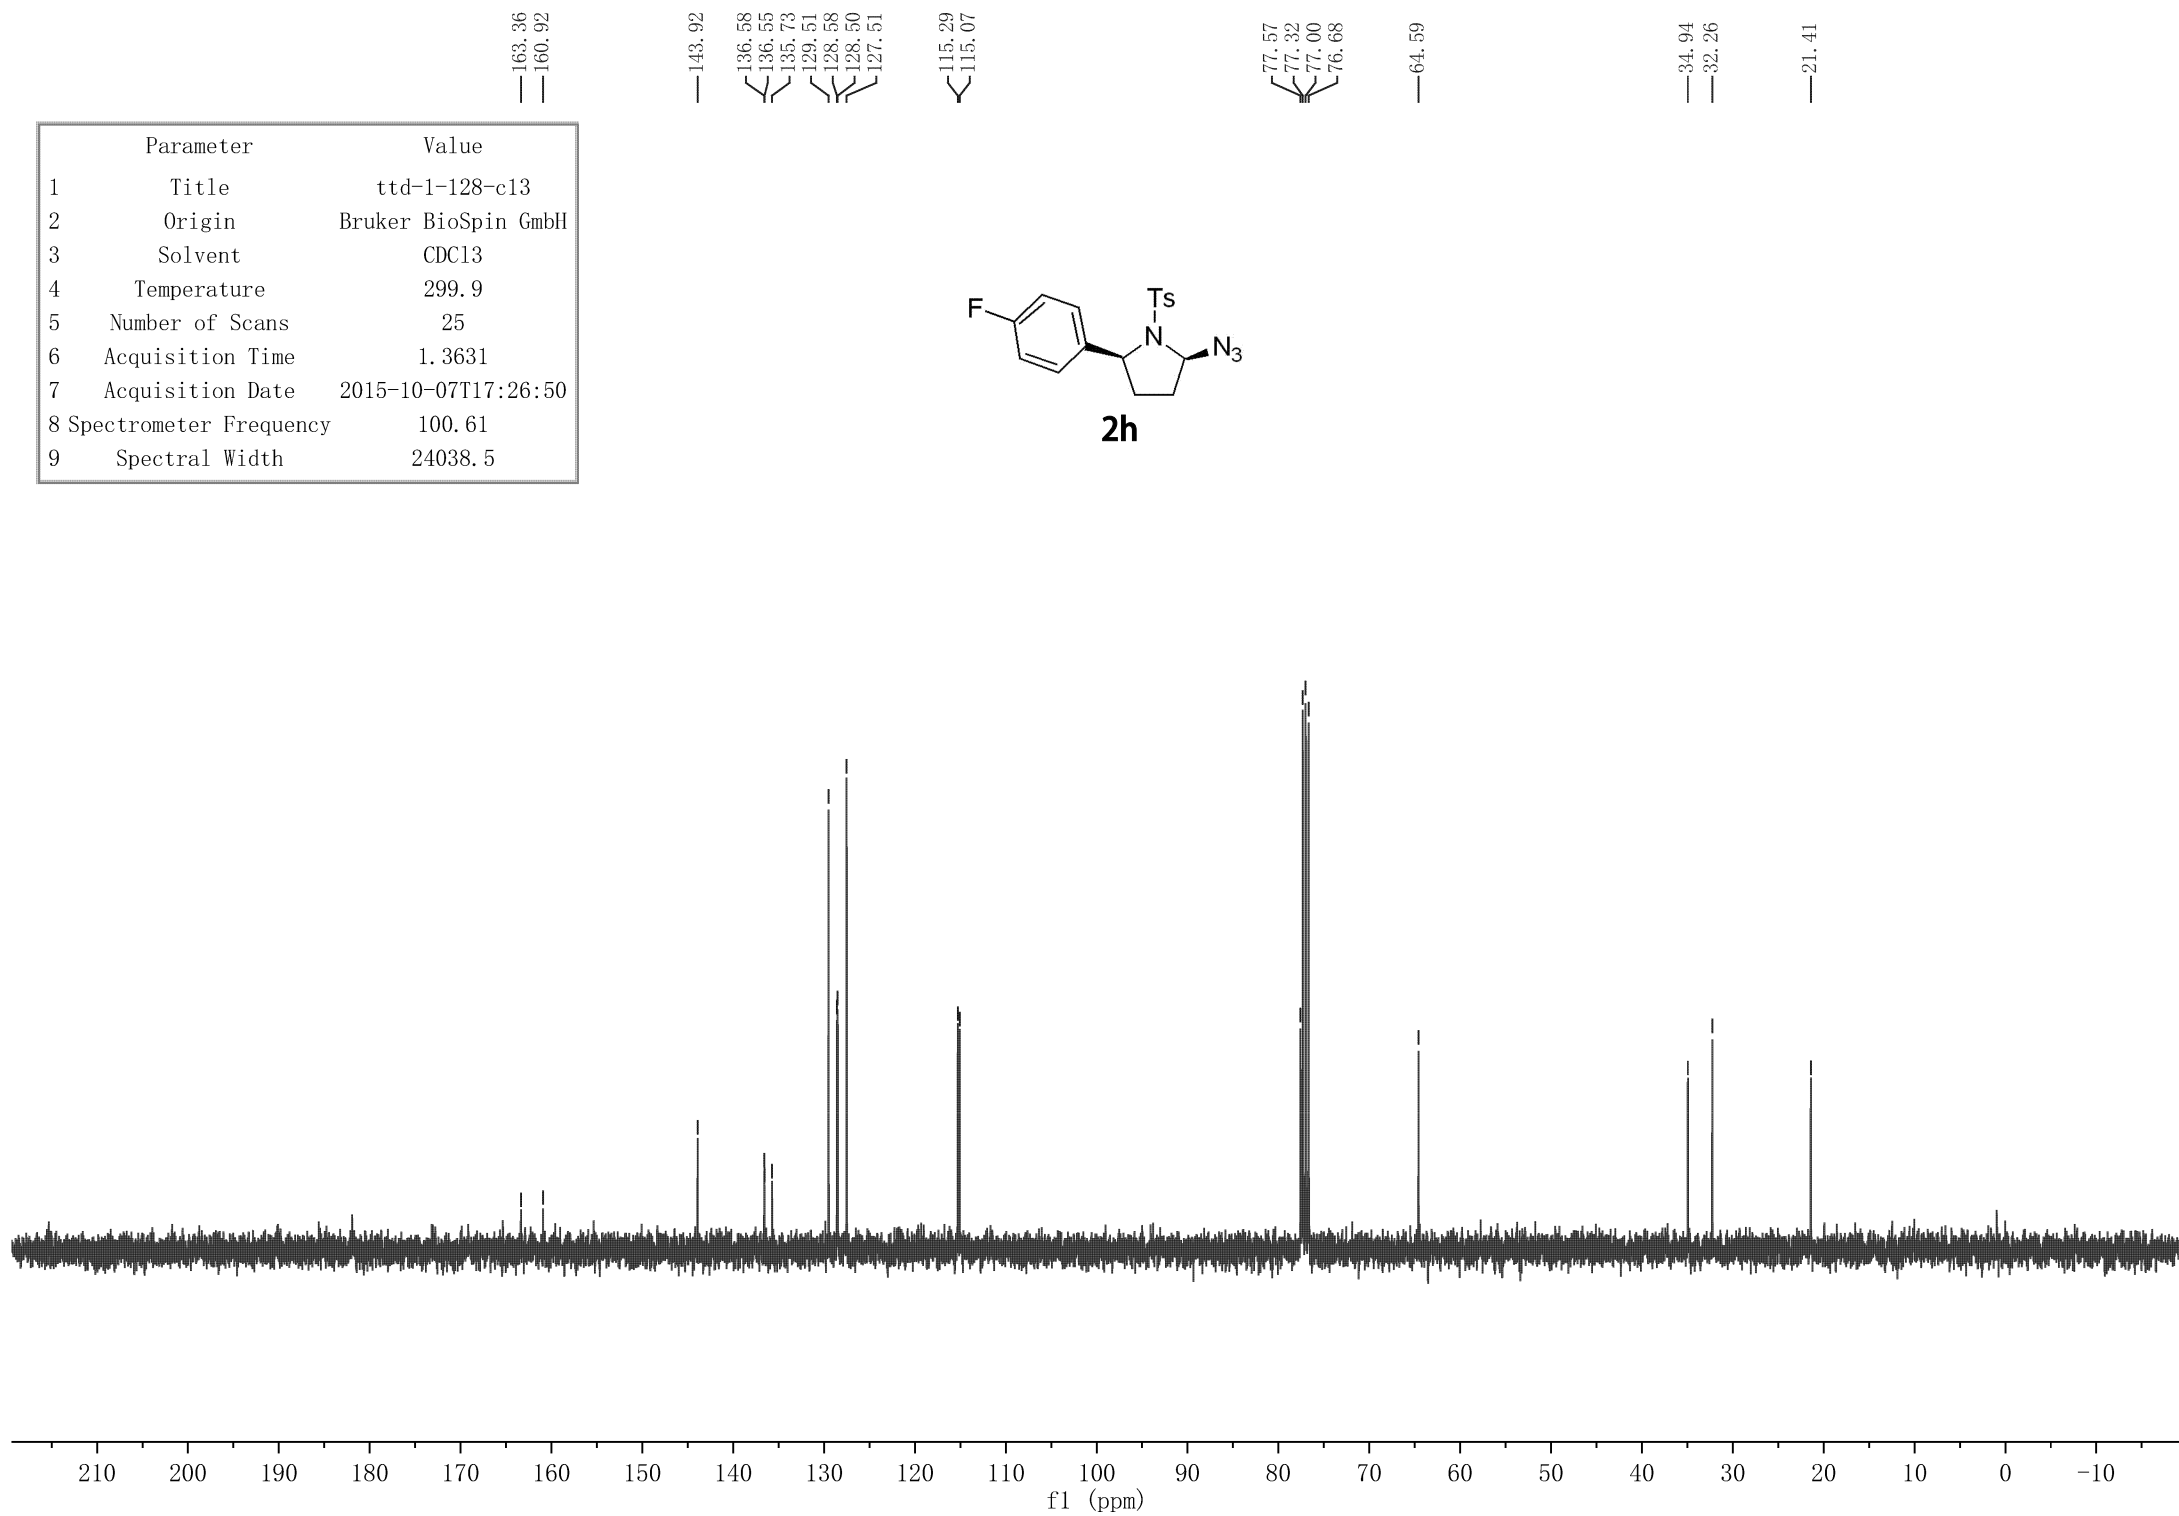

|   | Parameter              | Value               |
|---|------------------------|---------------------|
| 1 | Title                  | ttd-1-116           |
| 2 | Origin                 | Bruker BioSpin GmbH |
| 3 | Solvent                | CDC13               |
| 4 | Temperature            | 300.3               |
| 5 | Number of Scans        | 9                   |
| 6 | Acquisition Time       | 3.9846              |
| 7 | Acquisition Date       | 2015-09-26T08:37:17 |
| 8 | Spectrometer Frequency | 400.13              |
| 9 | Spectral Width         | 8223.7              |

7.526  
7.505  
7.195  
7.177  
7.154  
7.138

5.785  
5.772

4.615  
4.597  
4.592  
4.574

2.395  
2.297  
2.259  
2.226  
2.040  
1.970  
1.939  
1.902  
1.870  
1.855  
1.811  
1.779  
1.716

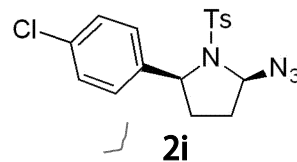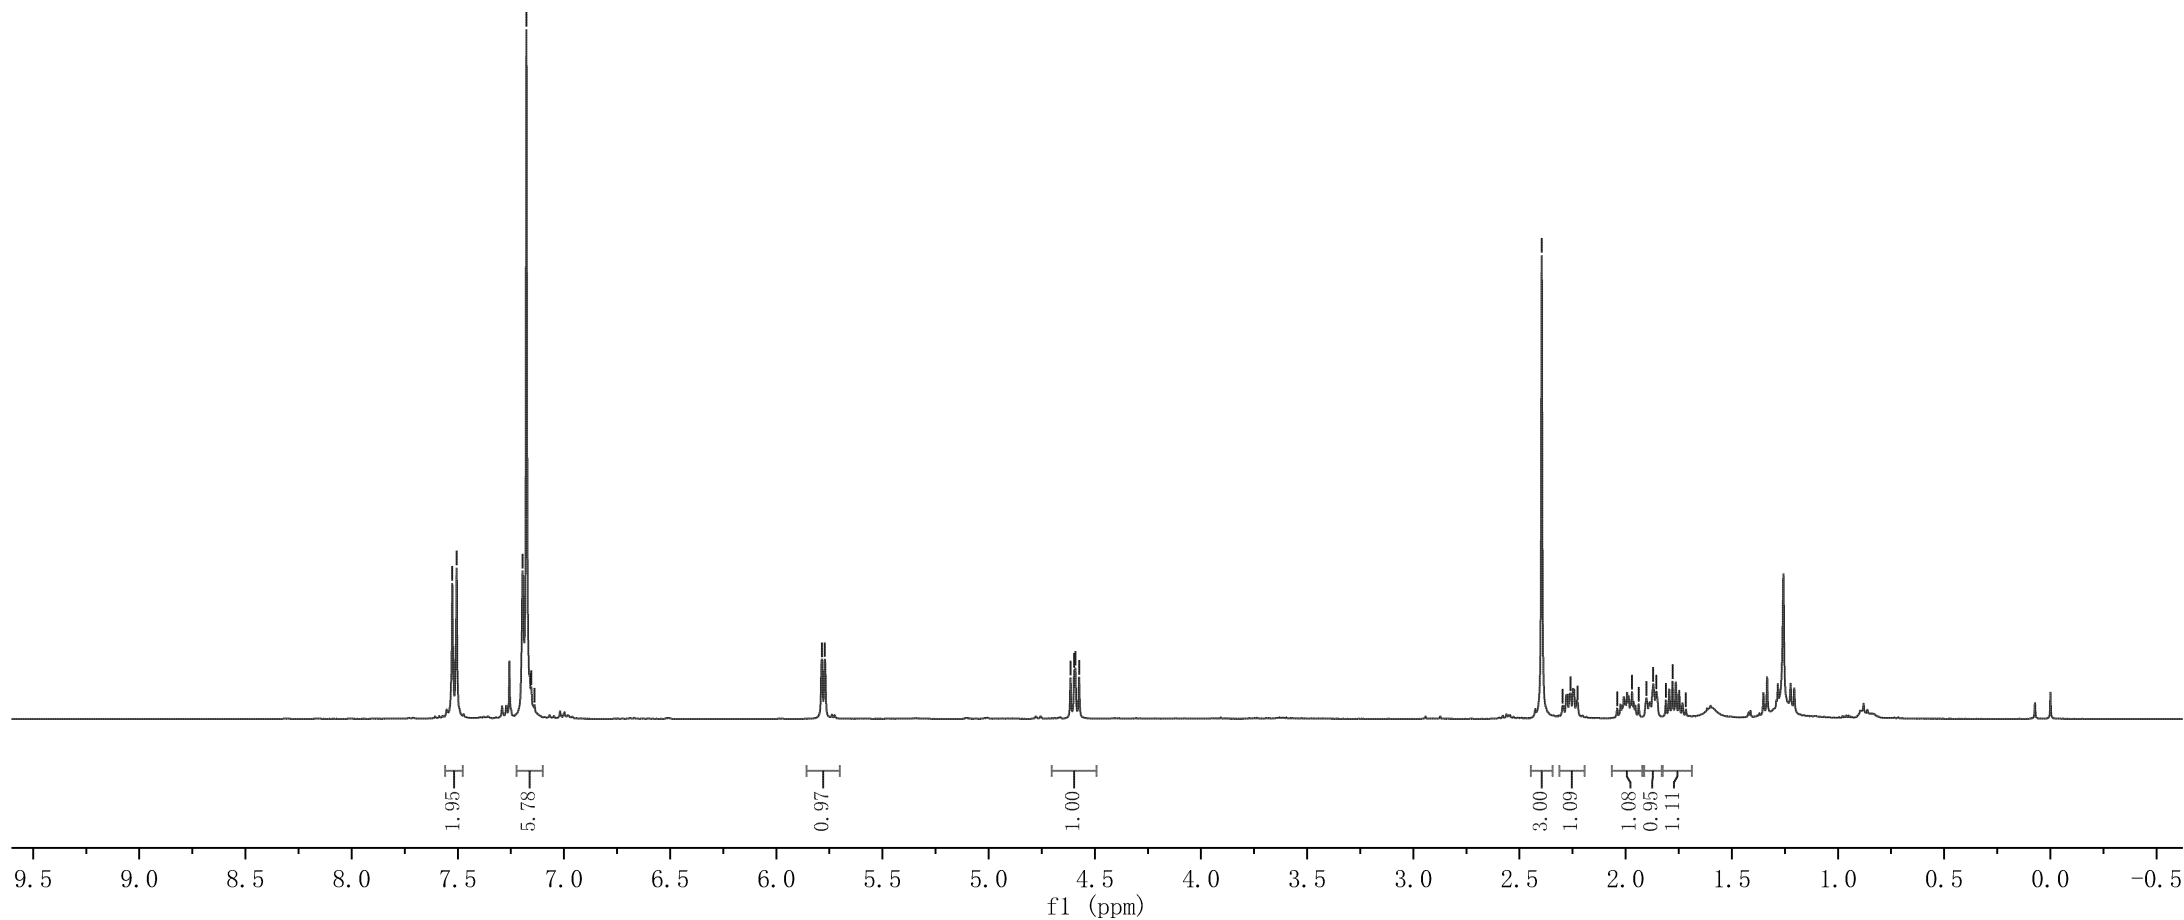

|   | Parameter              | Value               |
|---|------------------------|---------------------|
| 1 | Title                  | ttd-1-116-c13       |
| 2 | Origin                 | Bruker BioSpin GmbH |
| 3 | Solvent                | CDC13               |
| 4 | Temperature            | 300.0               |
| 5 | Number of Scans        | 21                  |
| 6 | Acquisition Time       | 1.3631              |
| 7 | Acquisition Date       | 2015-09-24T21:17:29 |
| 8 | Spectrometer Frequency | 100.61              |
| 9 | Spectral Width         | 24038.5             |

144.03  
139.38  
135.62  
133.29  
129.54  
128.49  
128.26  
127.55

77.55  
77.32  
77.00  
76.68

64.58

34.85  
32.29

21.45

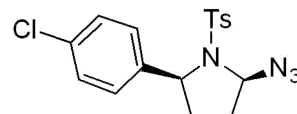

**2i**

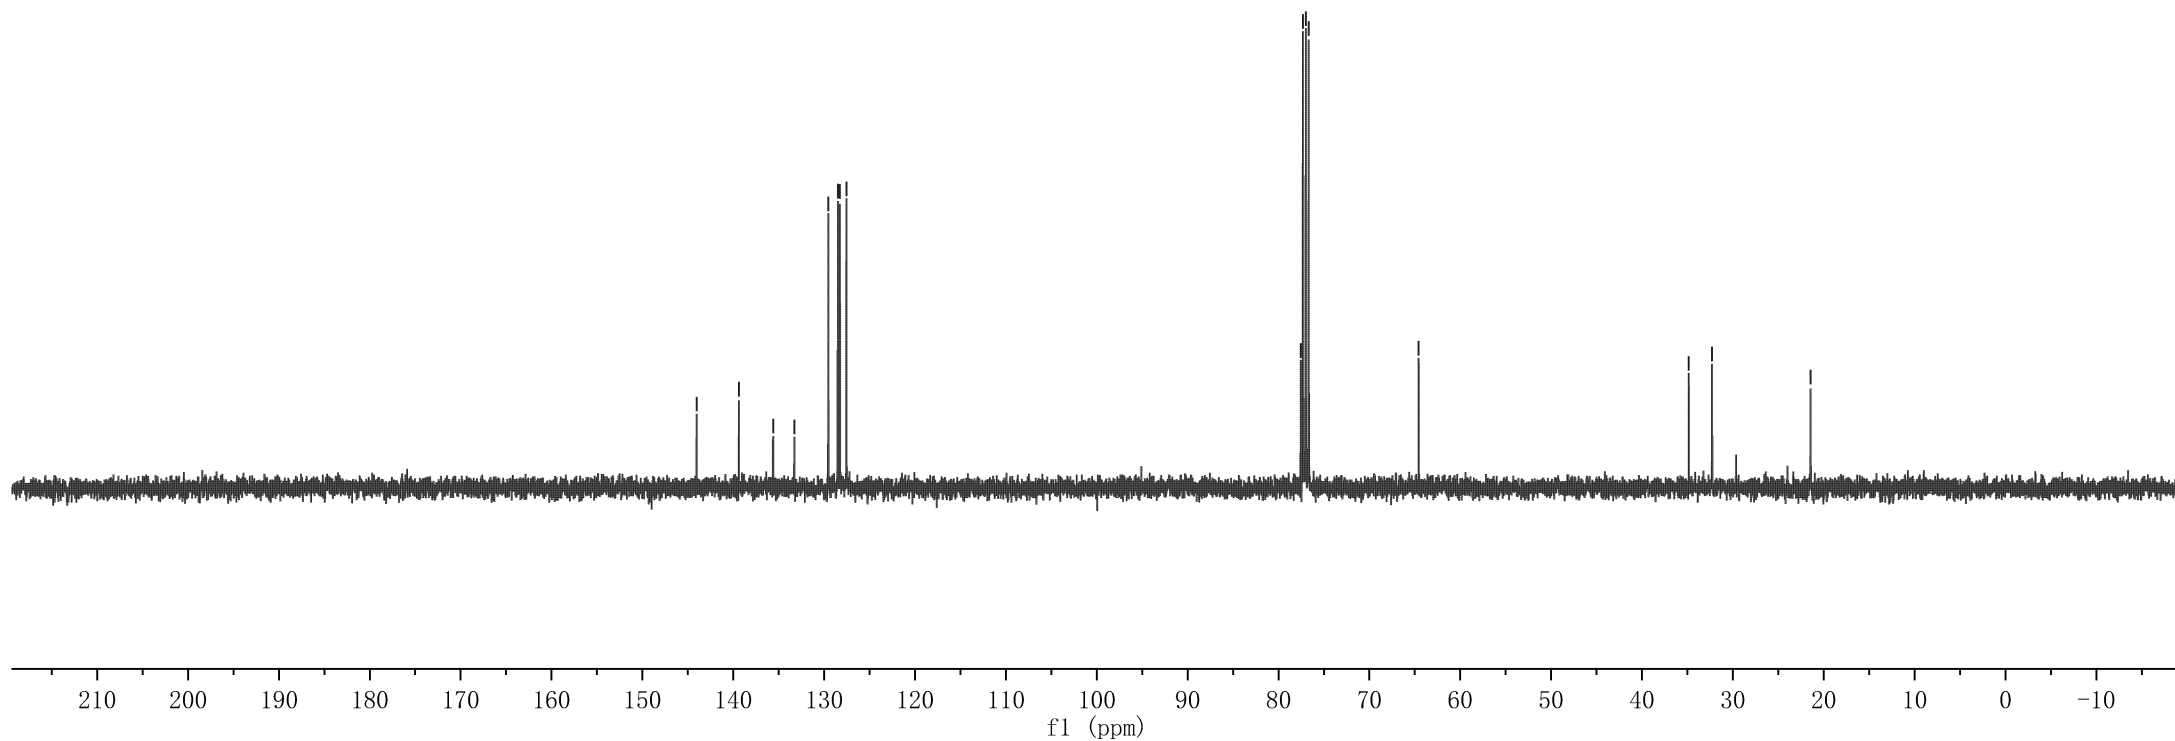

|   | Parameter              | Value               |
|---|------------------------|---------------------|
| 1 | Title                  | ttd-1-104           |
| 2 | Origin                 | Bruker BioSpin GmbH |
| 3 | Solvent                | CDCl3               |
| 4 | Temperature            | 300.3               |
| 5 | Number of Scans        | 12                  |
| 6 | Acquisition Time       | 3.9846              |
| 7 | Acquisition Date       | 2015-09-29T08:51:20 |
| 8 | Spectrometer Frequency | 400.13              |
| 9 | Spectral Width         | 8223.7              |

7.526  
7.505  
7.342  
7.321  
7.195  
7.175  
7.124  
7.103

5.775  
5.761

4.586  
4.568  
4.564  
4.546

2.396  
2.289  
2.252  
2.218  
2.028  
1.965  
1.927  
1.890  
1.858  
1.842  
1.794  
1.747  
1.699

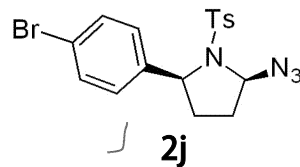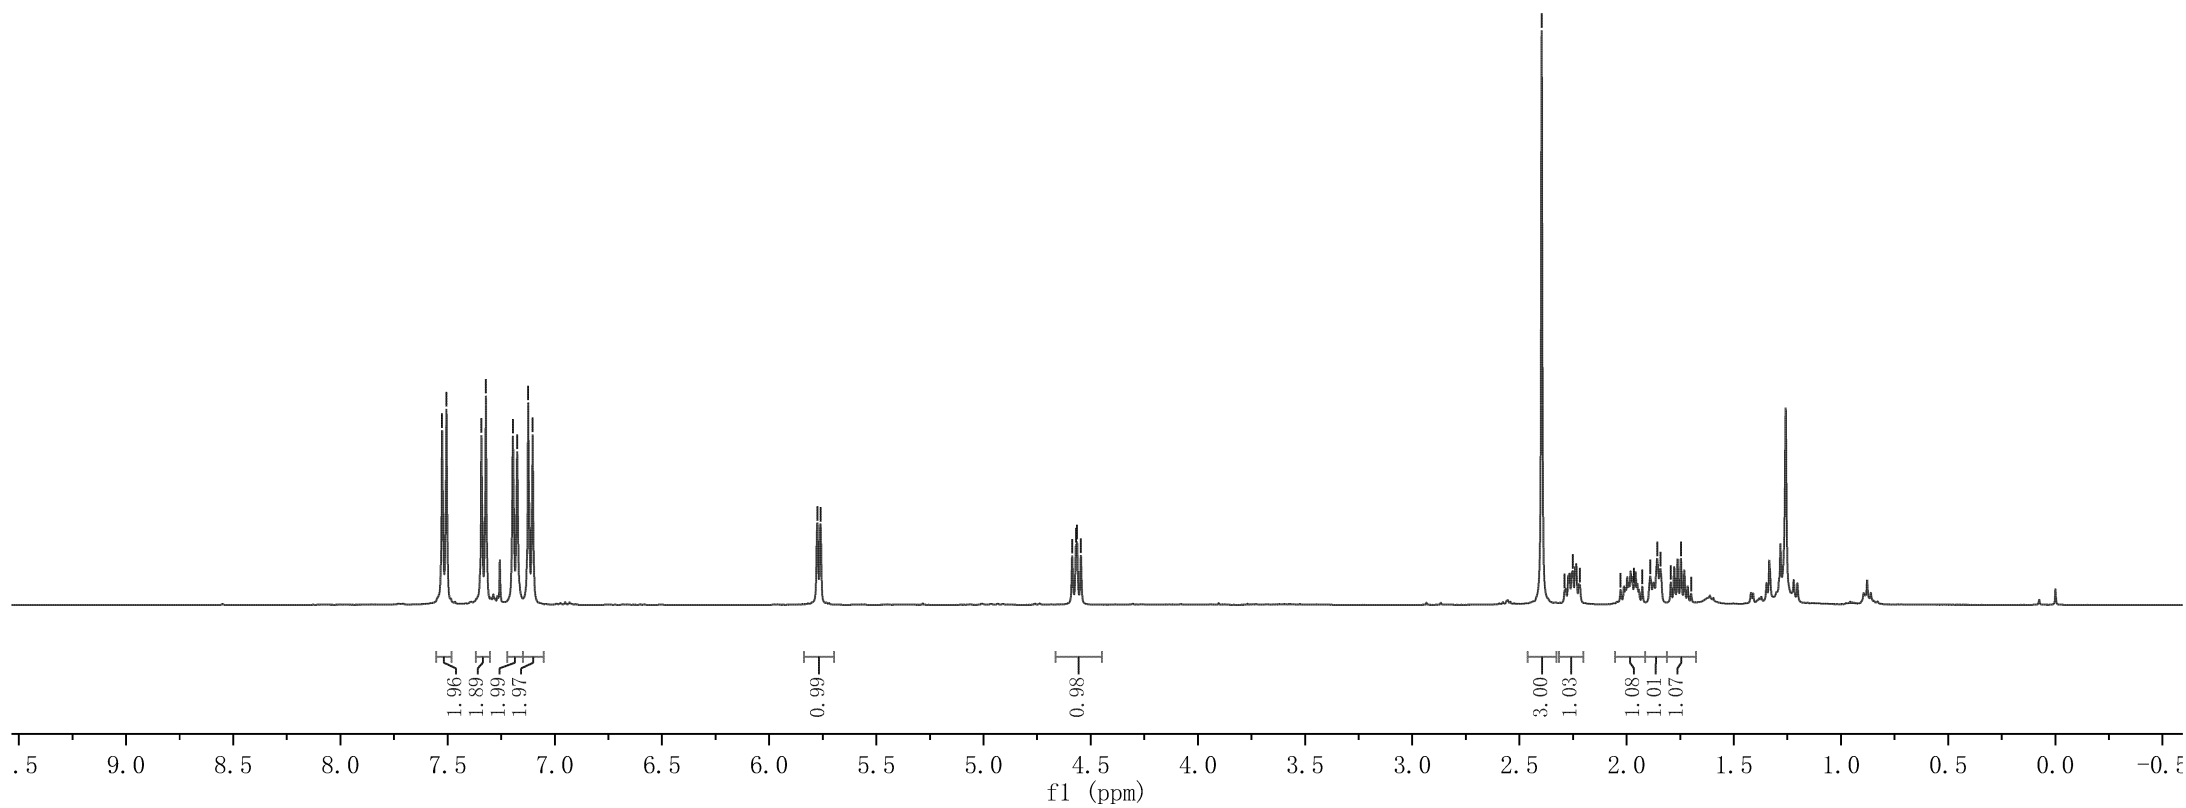

|   | Parameter              | Value               |
|---|------------------------|---------------------|
| 1 | Title                  | ttd-1-104-c13       |
| 2 | Origin                 | Bruker BioSpin GmbH |
| 3 | Solvent                | CDC13               |
| 4 | Temperature            | 297.4               |
| 5 | Number of Scans        | 60                  |
| 6 | Acquisition Time       | 1.3631              |
| 7 | Acquisition Date       | 2015-09-16T17:03:05 |
| 8 | Spectrometer Frequency | 100.60              |
| 9 | Spectral Width         | 24038.5             |

144.05  
139.86  
135.49  
131.43  
129.55  
128.59  
127.51

121.35

77.51  
77.32  
77.00  
76.68

64.60

34.81  
32.27

21.48

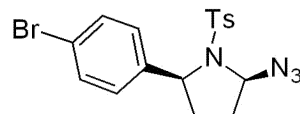

**2j**

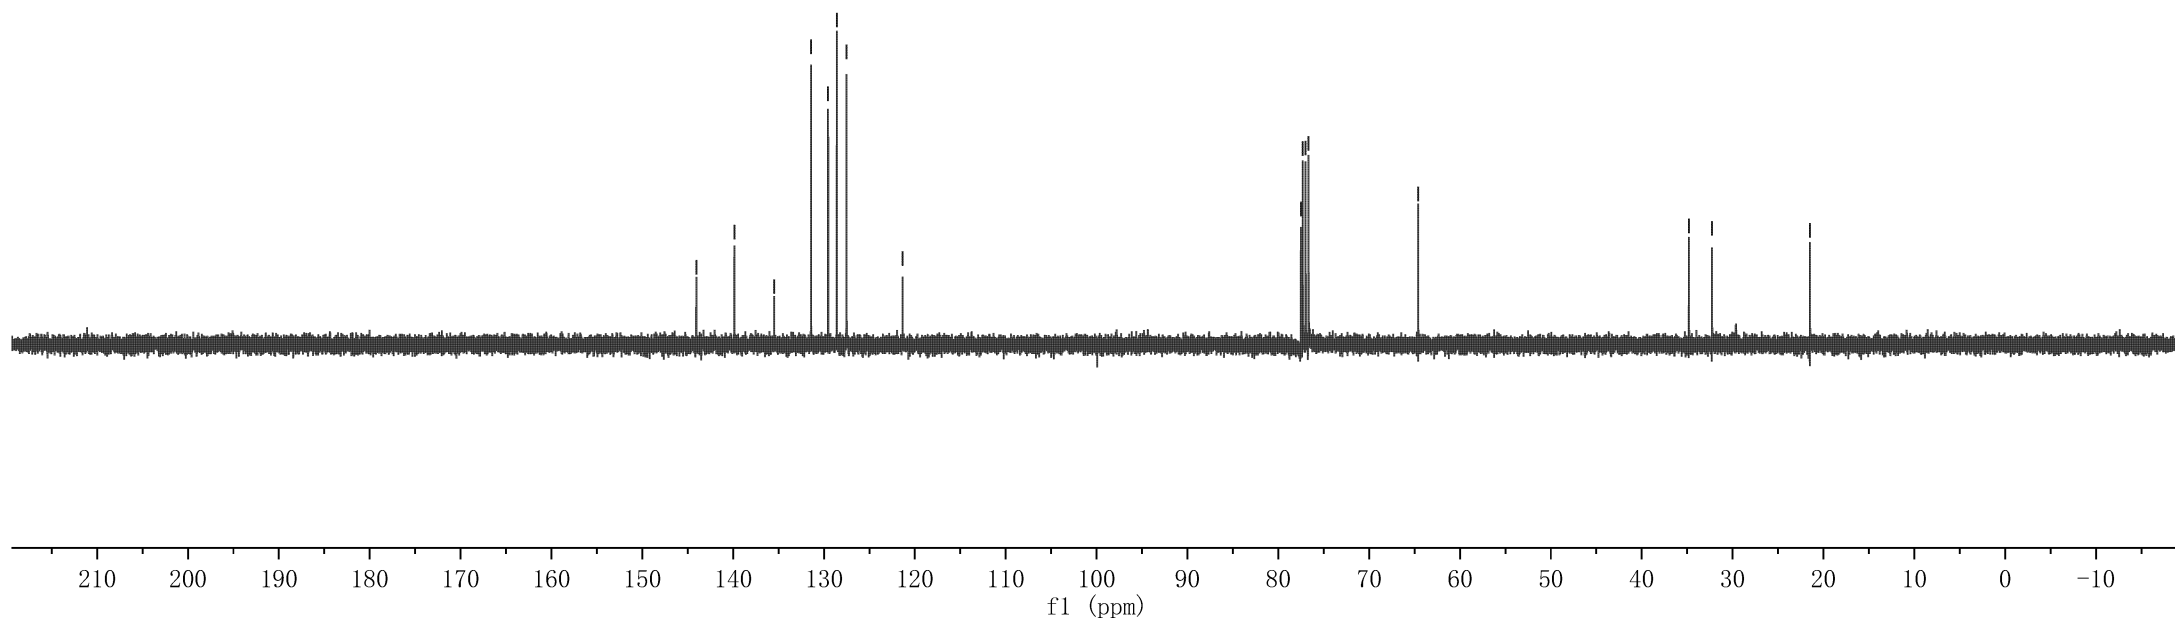

| Parameter                | Value               |
|--------------------------|---------------------|
| 1 Title                  | ttd-1-120           |
| 2 Origin                 | Bruker BioSpin GmbH |
| 3 Solvent                | CDC13               |
| 4 Temperature            | 300.1               |
| 5 Number of Scans        | 16                  |
| 6 Acquisition Time       | 3.9846              |
| 7 Acquisition Date       | 2015-09-29T08:37:52 |
| 8 Spectrometer Frequency | 400.13              |
| 9 Spectral Width         | 8223.7              |

7.710  
7.689  
7.543  
7.540  
7.523  
7.520  
7.479  
7.460  
7.281  
7.261  
7.242  
7.104  
7.085  
7.083  
7.063

5.727  
5.713

5.037  
5.018  
4.999

2.409  
2.380  
2.339  
2.325  
1.874  
1.828  
1.788  
1.774  
1.675  
1.638  
1.580

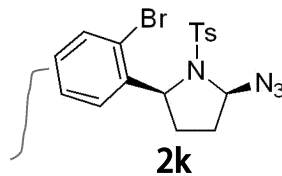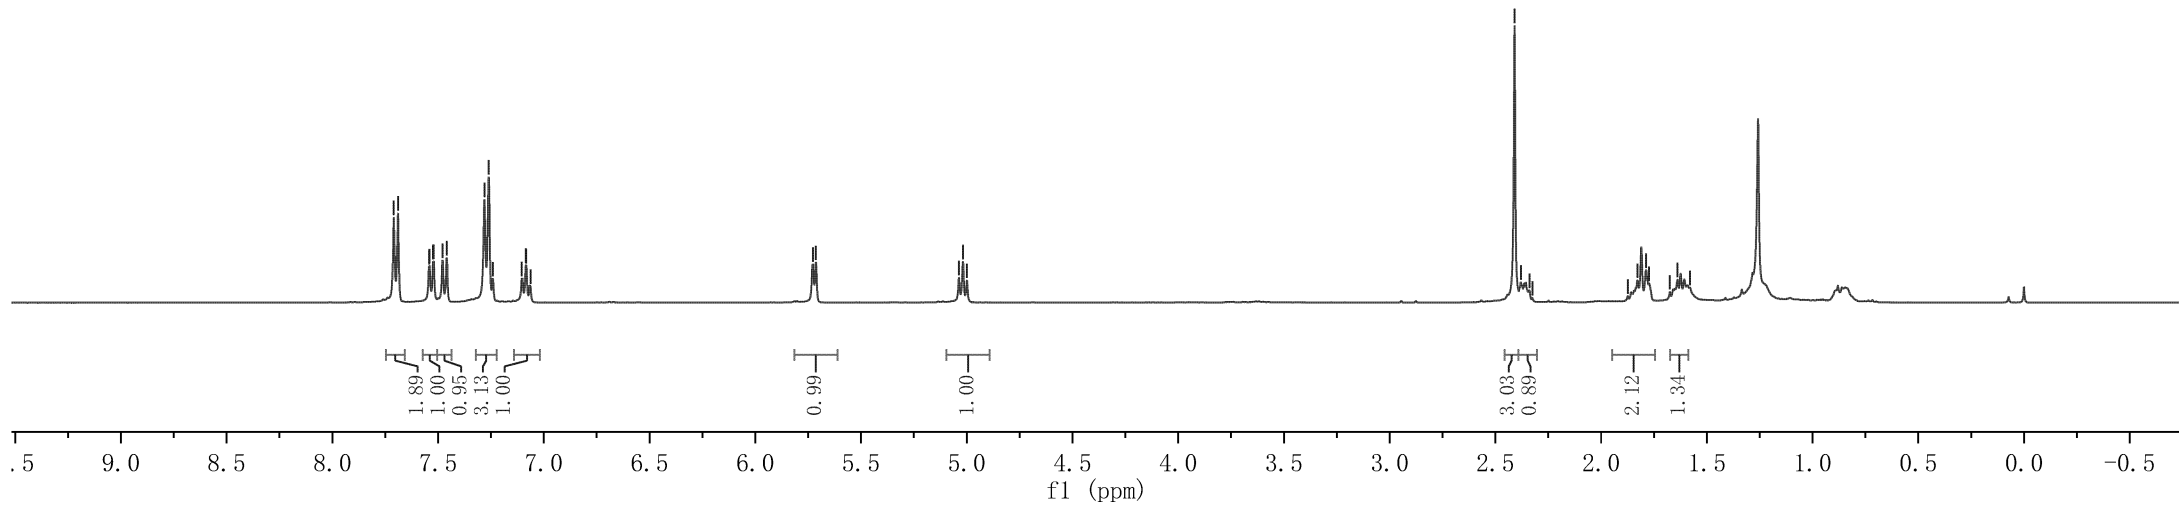

|   | Parameter              | Value               |
|---|------------------------|---------------------|
| 1 | Title                  | ttd-1-120-c13       |
| 2 | Origin                 | Bruker BioSpin GmbH |
| 3 | Solvent                | CDCl3               |
| 4 | Temperature            | 300.1               |
| 5 | Number of Scans        | 79                  |
| 6 | Acquisition Time       | 1.3631              |
| 7 | Acquisition Date       | 2015-09-29T08:41:02 |
| 8 | Spectrometer Frequency | 100.61              |
| 9 | Spectral Width         | 24038.5             |

144.23  
140.53  
134.72  
132.40  
129.78  
128.76  
128.23  
127.93  
127.80  
122.02

78.04  
77.32  
77.00  
76.68

64.44

33.23  
32.00

21.50

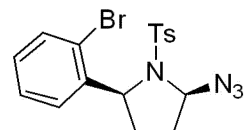

**2k**

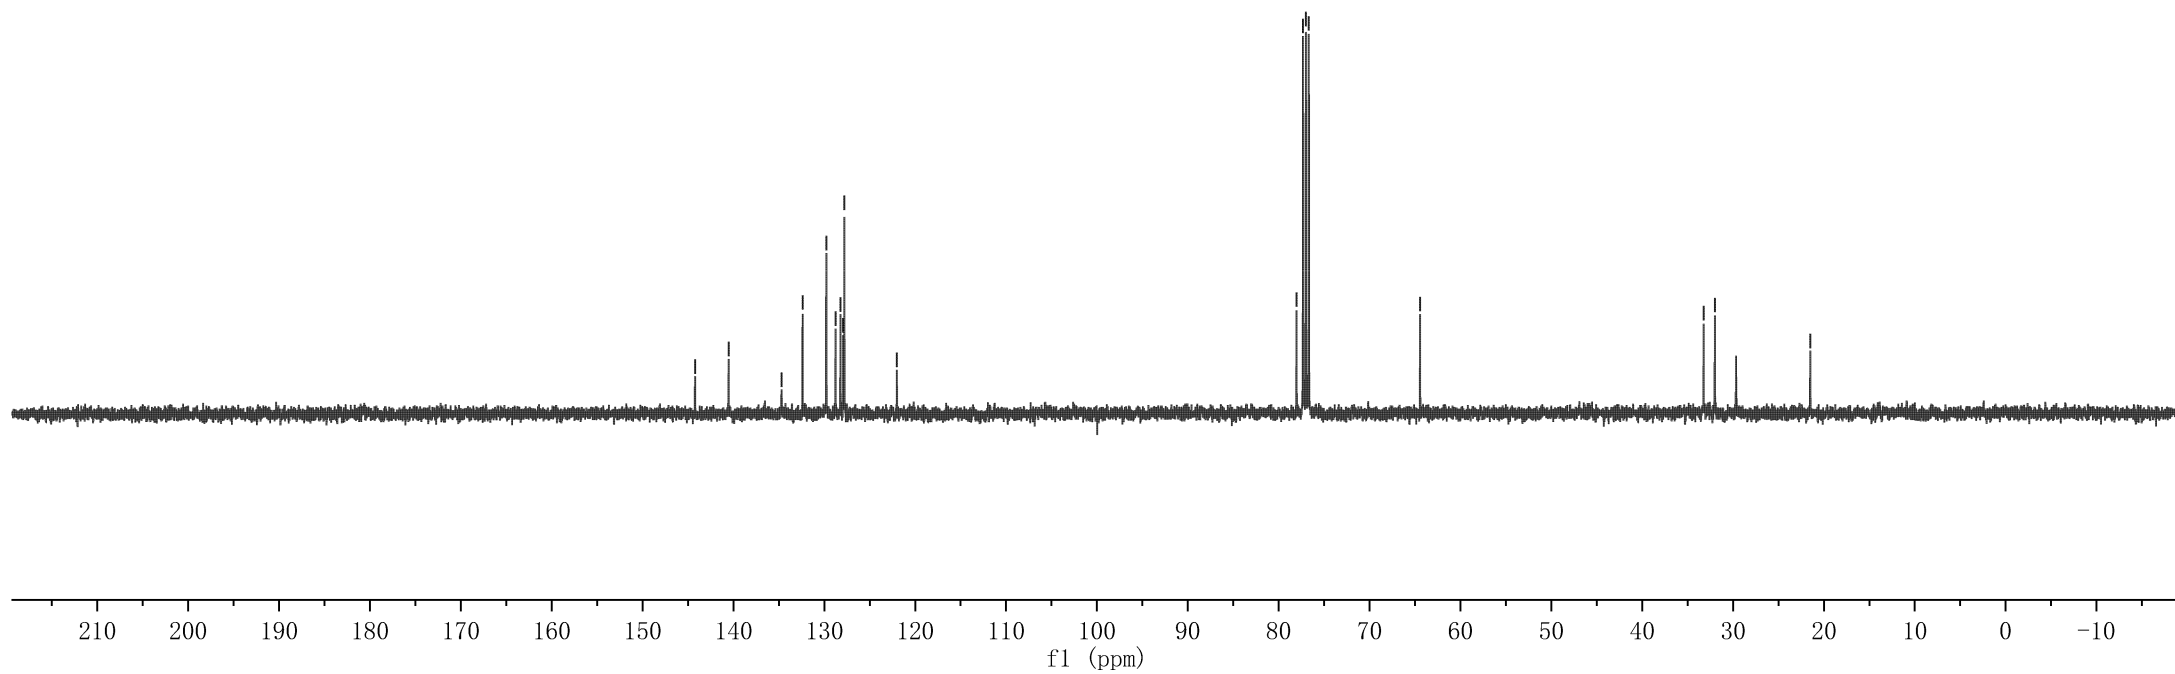

|   | Parameter              | Value               |
|---|------------------------|---------------------|
| 1 | Title                  | ttd-1-138-2         |
| 2 | Origin                 | Bruker BioSpin GmbH |
| 3 | Solvent                | CDCl3               |
| 4 | Temperature            | 296.4               |
| 5 | Number of Scans        | 10                  |
| 6 | Acquisition Time       | 3.9846              |
| 7 | Acquisition Date       | 2015-10-13T08:07:05 |
| 8 | Spectrometer Frequency | 400.13              |
| 9 | Spectral Width         | 8223.7              |

5.886  
5.877  
5.871  
5.863  
5.514  
5.496  
5.477

2.444  
2.427  
2.396  
2.365  
2.339  
2.091  
2.072  
2.019  
2.000  
1.952  
1.920  
1.882  
1.844

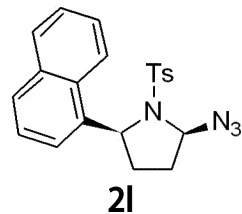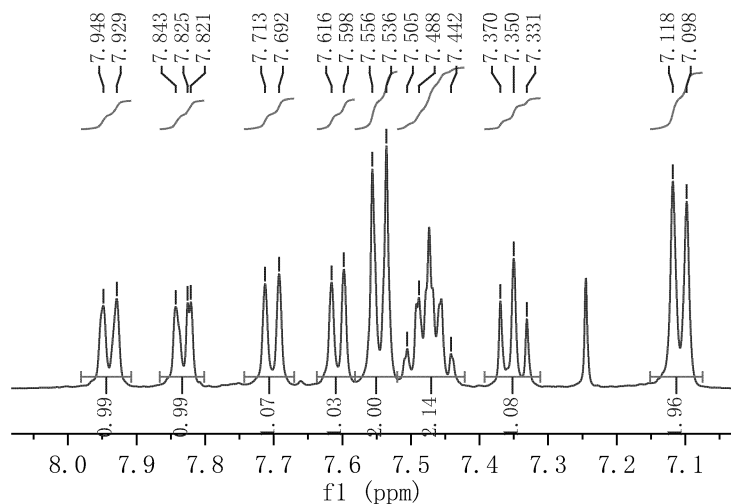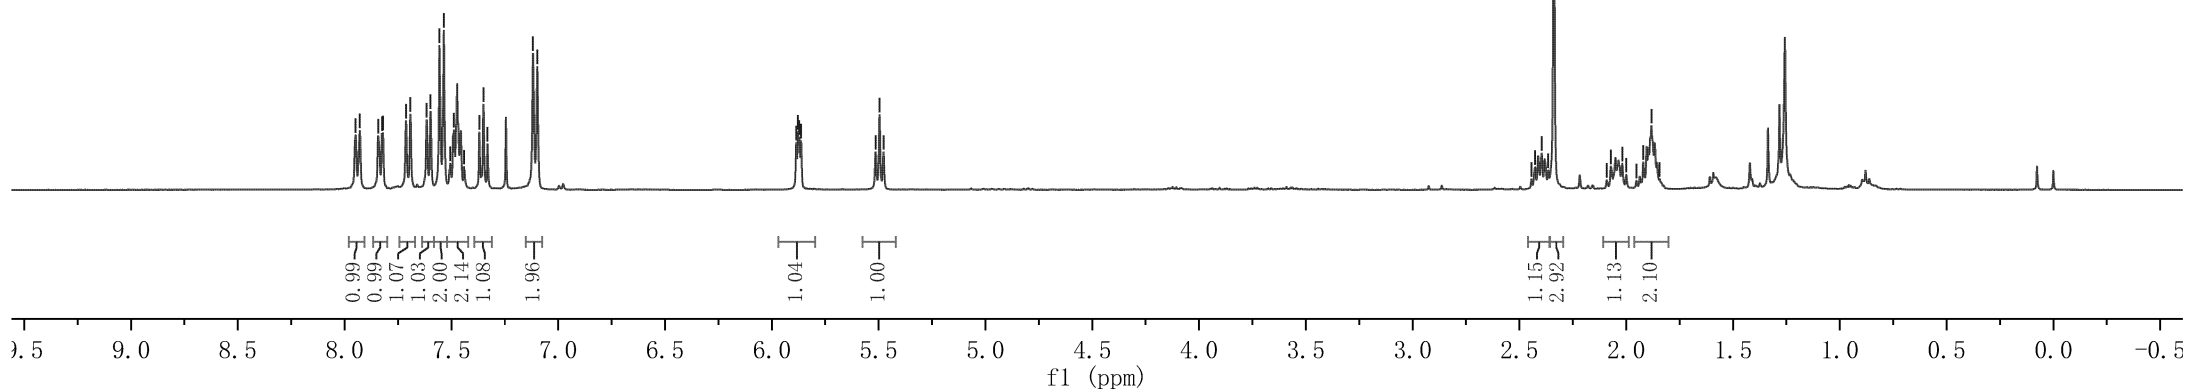

|   | Parameter              | Value               |
|---|------------------------|---------------------|
| 1 | Title                  | ttd-1-138-2-c13     |
| 2 | Origin                 | Bruker BioSpin GmbH |
| 3 | Solvent                | CDC13               |
| 4 | Temperature            | 296.3               |
| 5 | Number of Scans        | 25                  |
| 6 | Acquisition Time       | 1.3631              |
| 7 | Acquisition Date       | 2015-10-13T08:10:11 |
| 8 | Spectrometer Frequency | 100.61              |
| 9 | Spectral Width         | 24038.5             |

143.88  
136.26  
135.30  
133.63  
130.20  
129.44  
128.94  
127.79  
127.62  
126.05  
125.48  
125.39  
124.36  
122.28

77.87  
77.32  
77.00  
76.68

62.02

33.85  
32.08

21.42

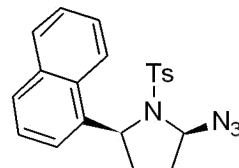

**2l**

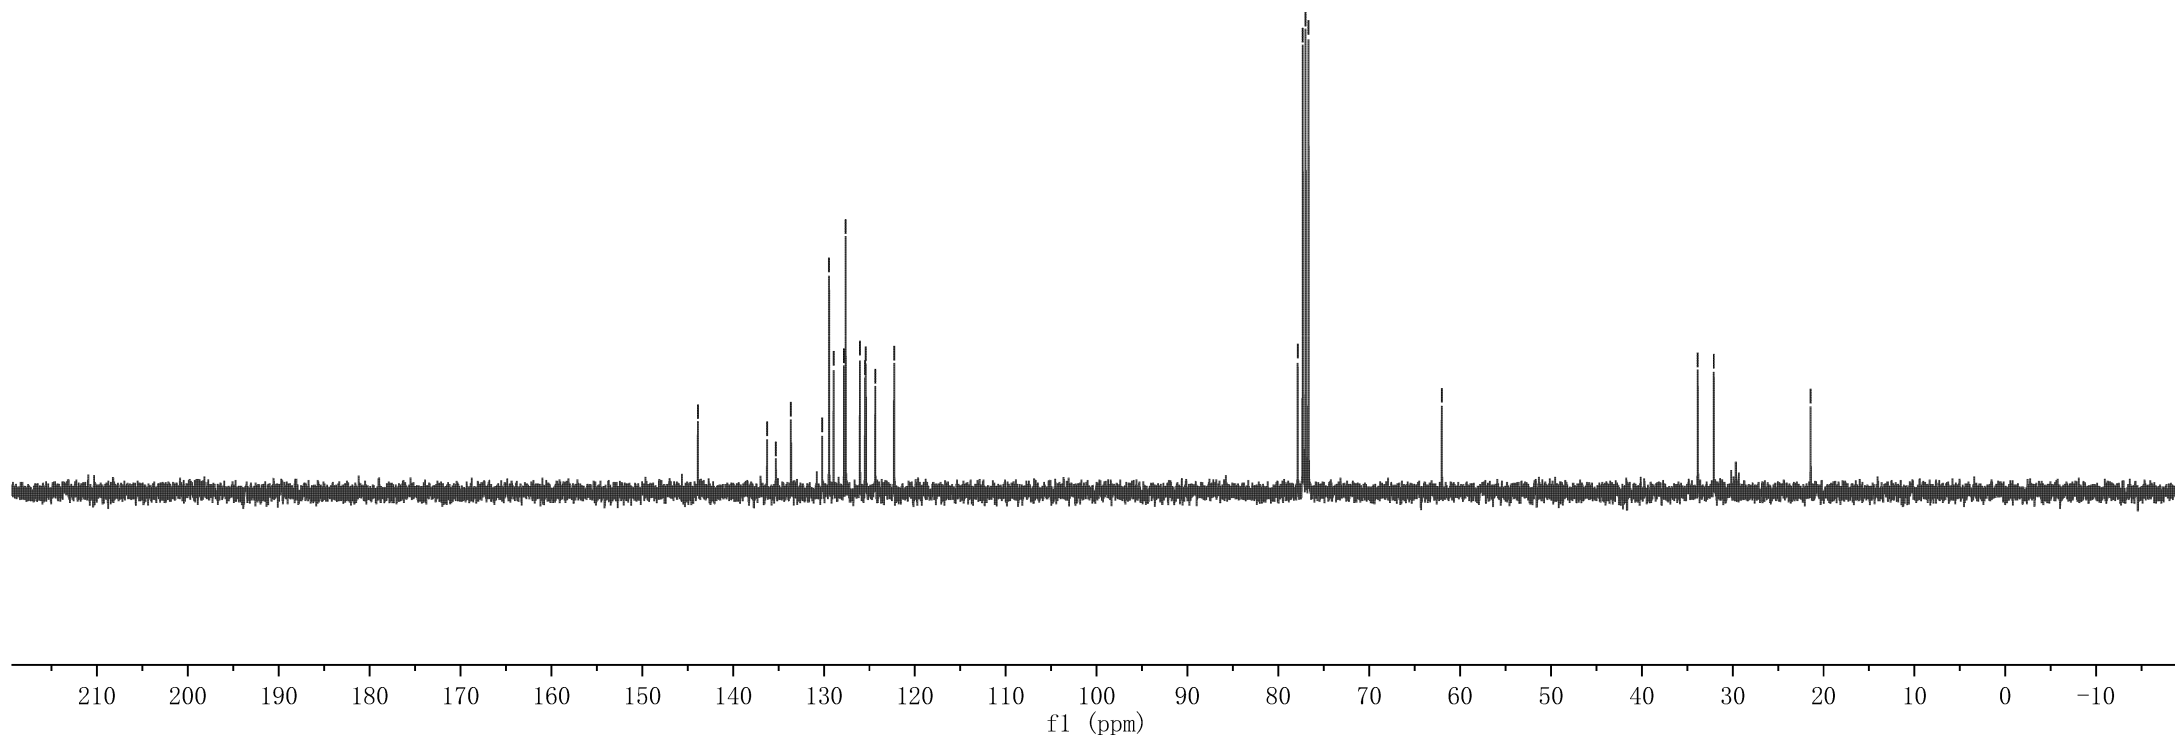

|   | Parameter              | Value               |
|---|------------------------|---------------------|
| 1 | Title                  | ttd-2-81-500-h      |
| 2 | Origin                 | Bruker BioSpin GmbH |
| 3 | Solvent                | CDC13               |
| 4 | Temperature            | 295.0               |
| 5 | Number of Scans        | 16                  |
| 6 | Acquisition Time       | 3.2768              |
| 7 | Acquisition Date       | 2016-02-22T16:20:00 |
| 8 | Spectrometer Frequency | 500.17              |
| 9 | Spectral Width         | 10000.0             |

7.729  
7.713

7.310  
7.294

5.832  
5.798  
5.784  
5.749

5.103  
5.077  
5.066  
5.057

3.649  
3.630  
3.581  
3.532

2.633  
2.608  
2.594  
2.583  
2.426  
2.309  
2.280  
2.264  
2.248

1.857  
1.812  
1.566  
1.522  
1.484  
1.430  
1.333  
1.297  
0.969  
0.891  
0.877

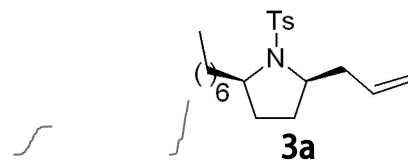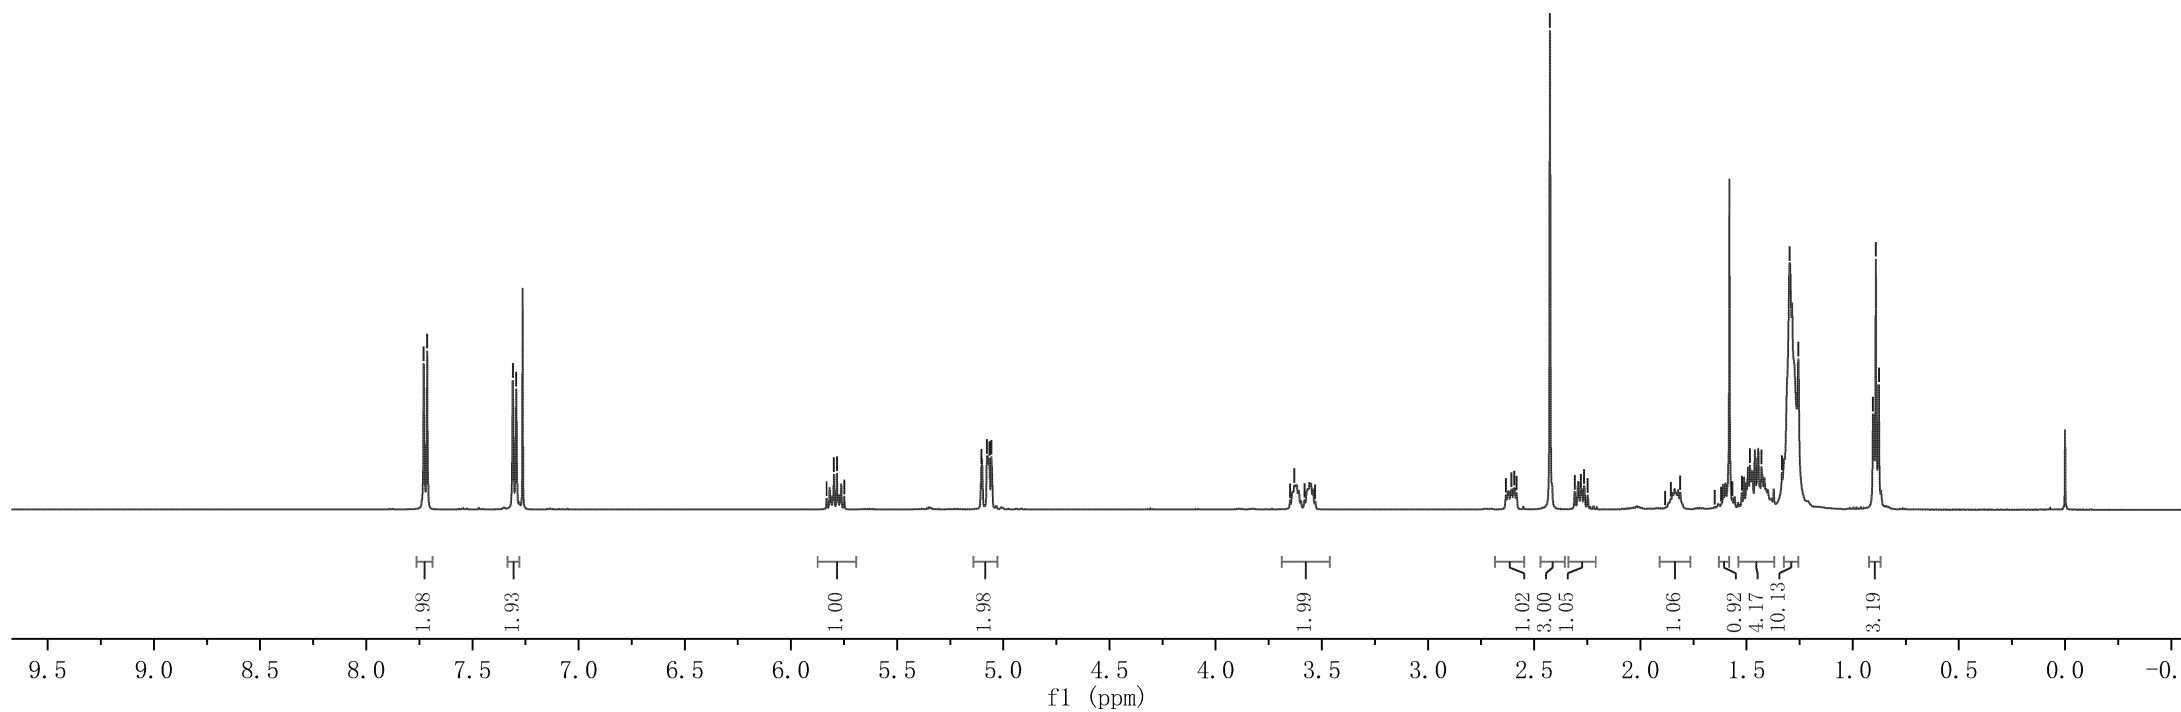

|   | Parameter              | Value               |
|---|------------------------|---------------------|
| 1 | Title                  | ttd-2-81-500-c      |
| 2 | Origin                 | Bruker BioSpin GmbH |
| 3 | Solvent                | CDC13               |
| 4 | Temperature            | 295.0               |
| 5 | Number of Scans        | 512                 |
| 6 | Acquisition Time       | 1.1010              |
| 7 | Acquisition Date       | 2016-02-22T16:48:00 |
| 8 | Spectrometer Frequency | 125.77              |
| 9 | Spectral Width         | 29761.9             |

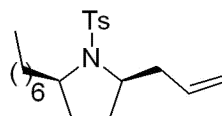

**3a**

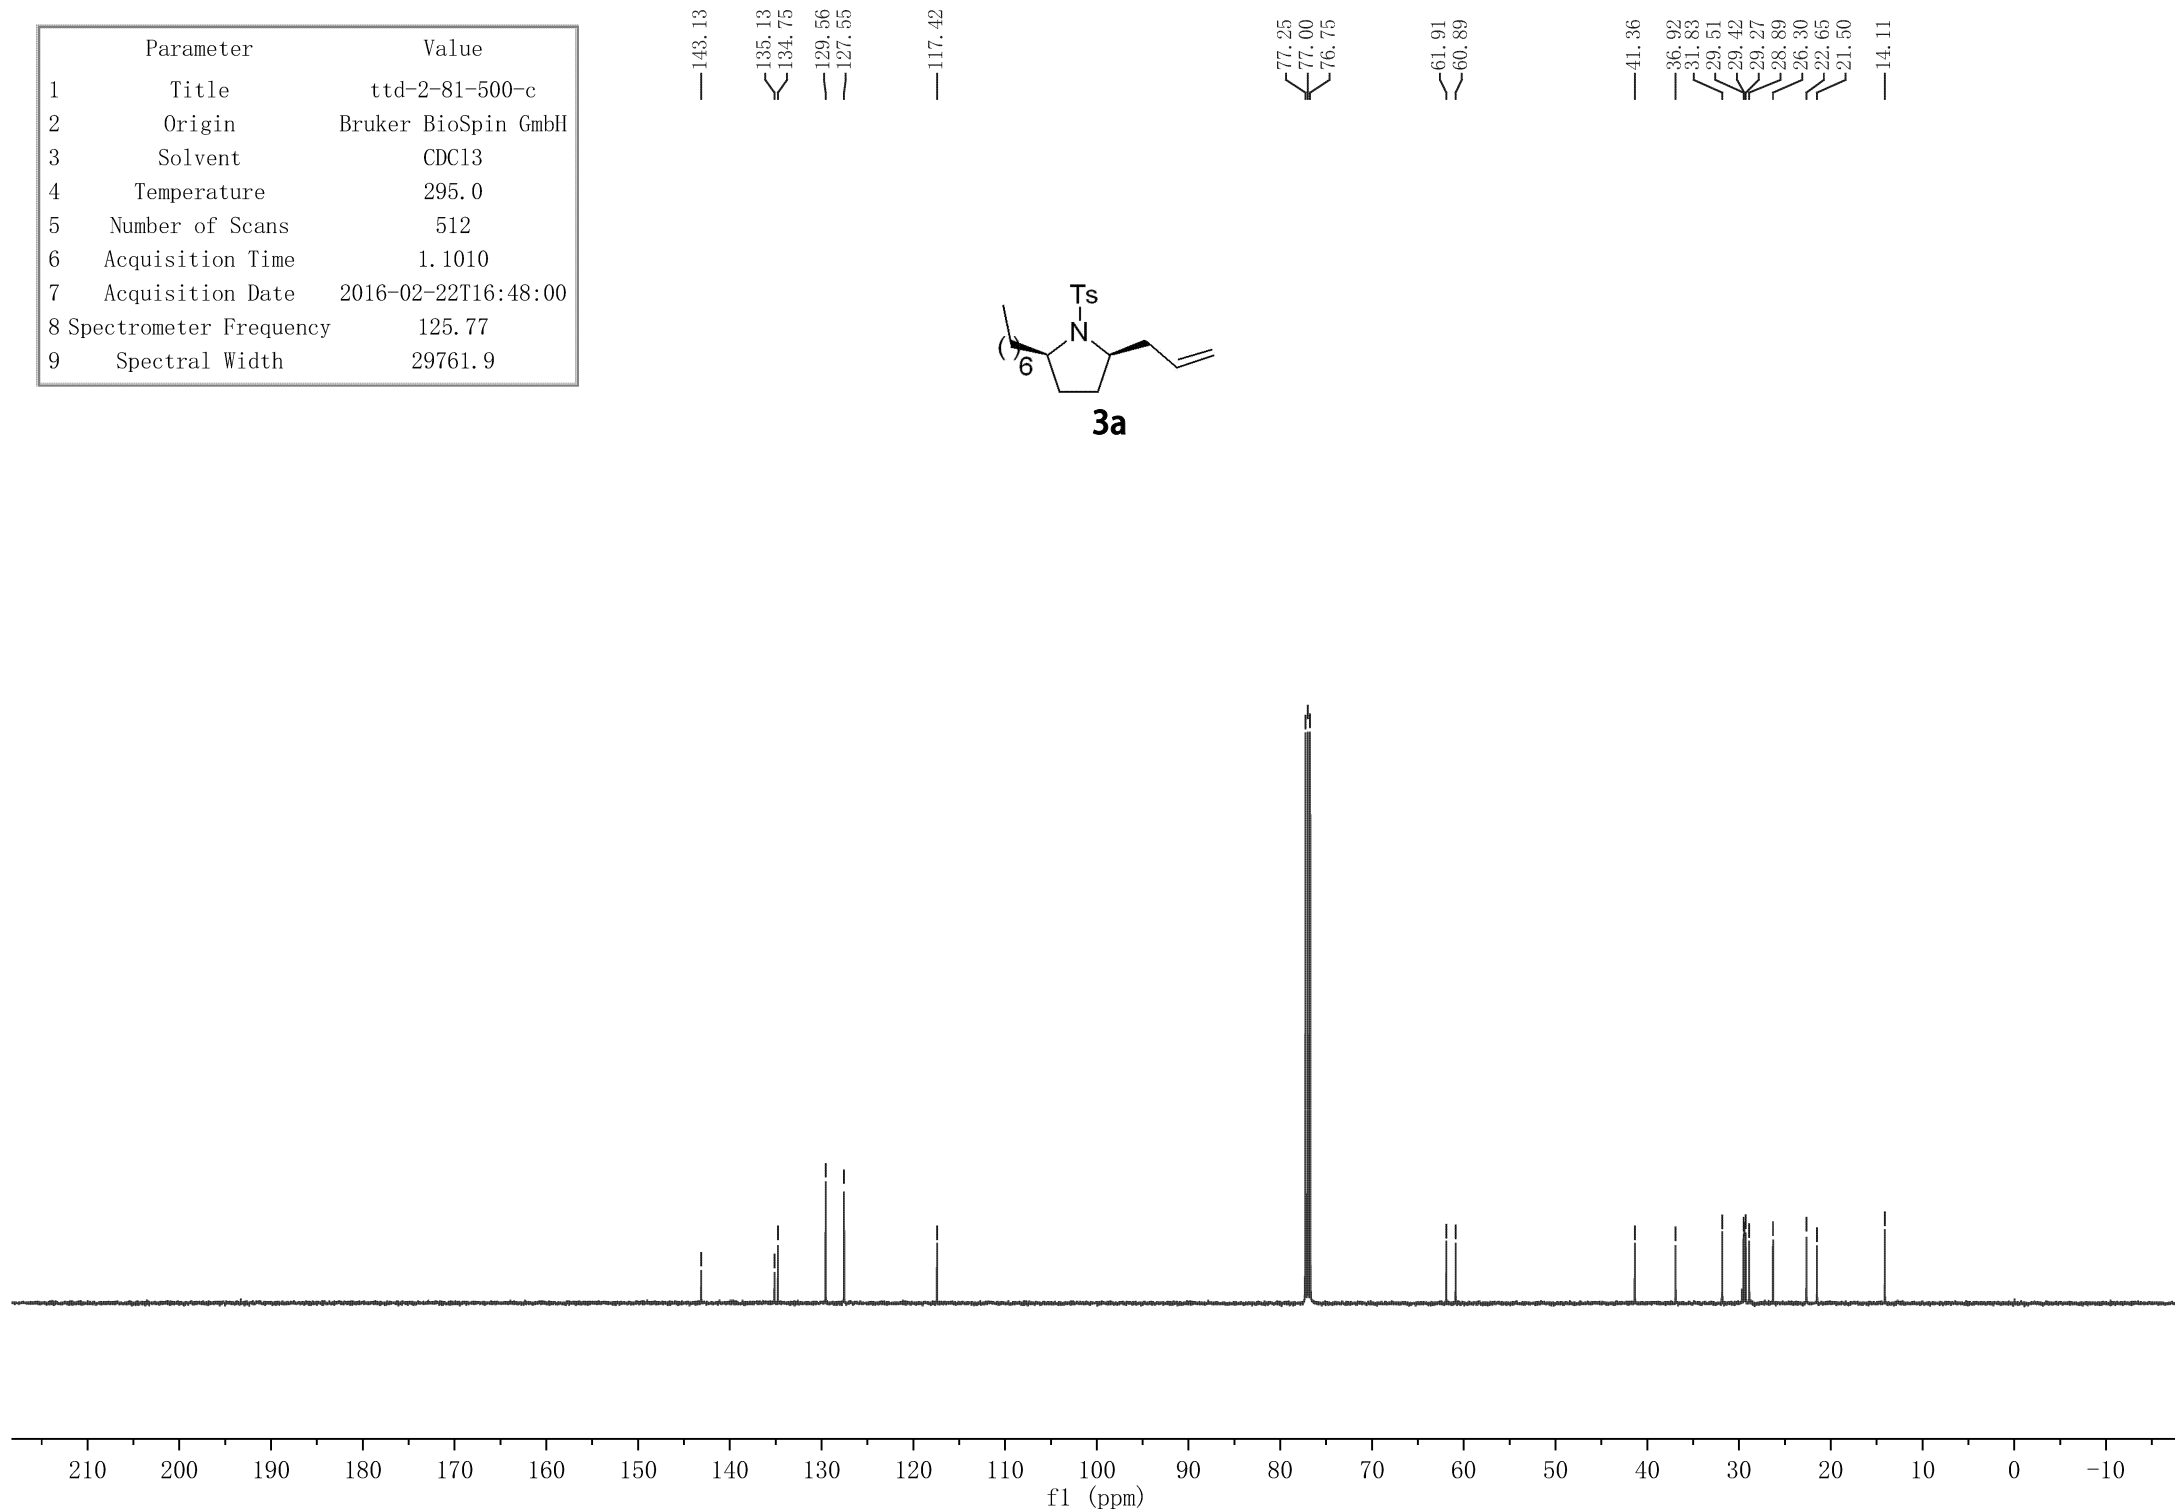

| Parameter                | Value               |
|--------------------------|---------------------|
| 1 Title                  | ttd-2-121-500-h     |
| 2 Origin                 | Bruker BioSpin GmbH |
| 3 Solvent                | CDC13               |
| 4 Temperature            | 295.0               |
| 5 Number of Scans        | 16                  |
| 6 Acquisition Time       | 3.2768              |
| 7 Acquisition Date       | 2016-03-12T16:14:00 |
| 8 Spectrometer Frequency | 500.17              |
| 9 Spectral Width         | 10000.0             |

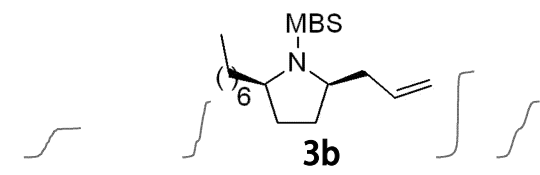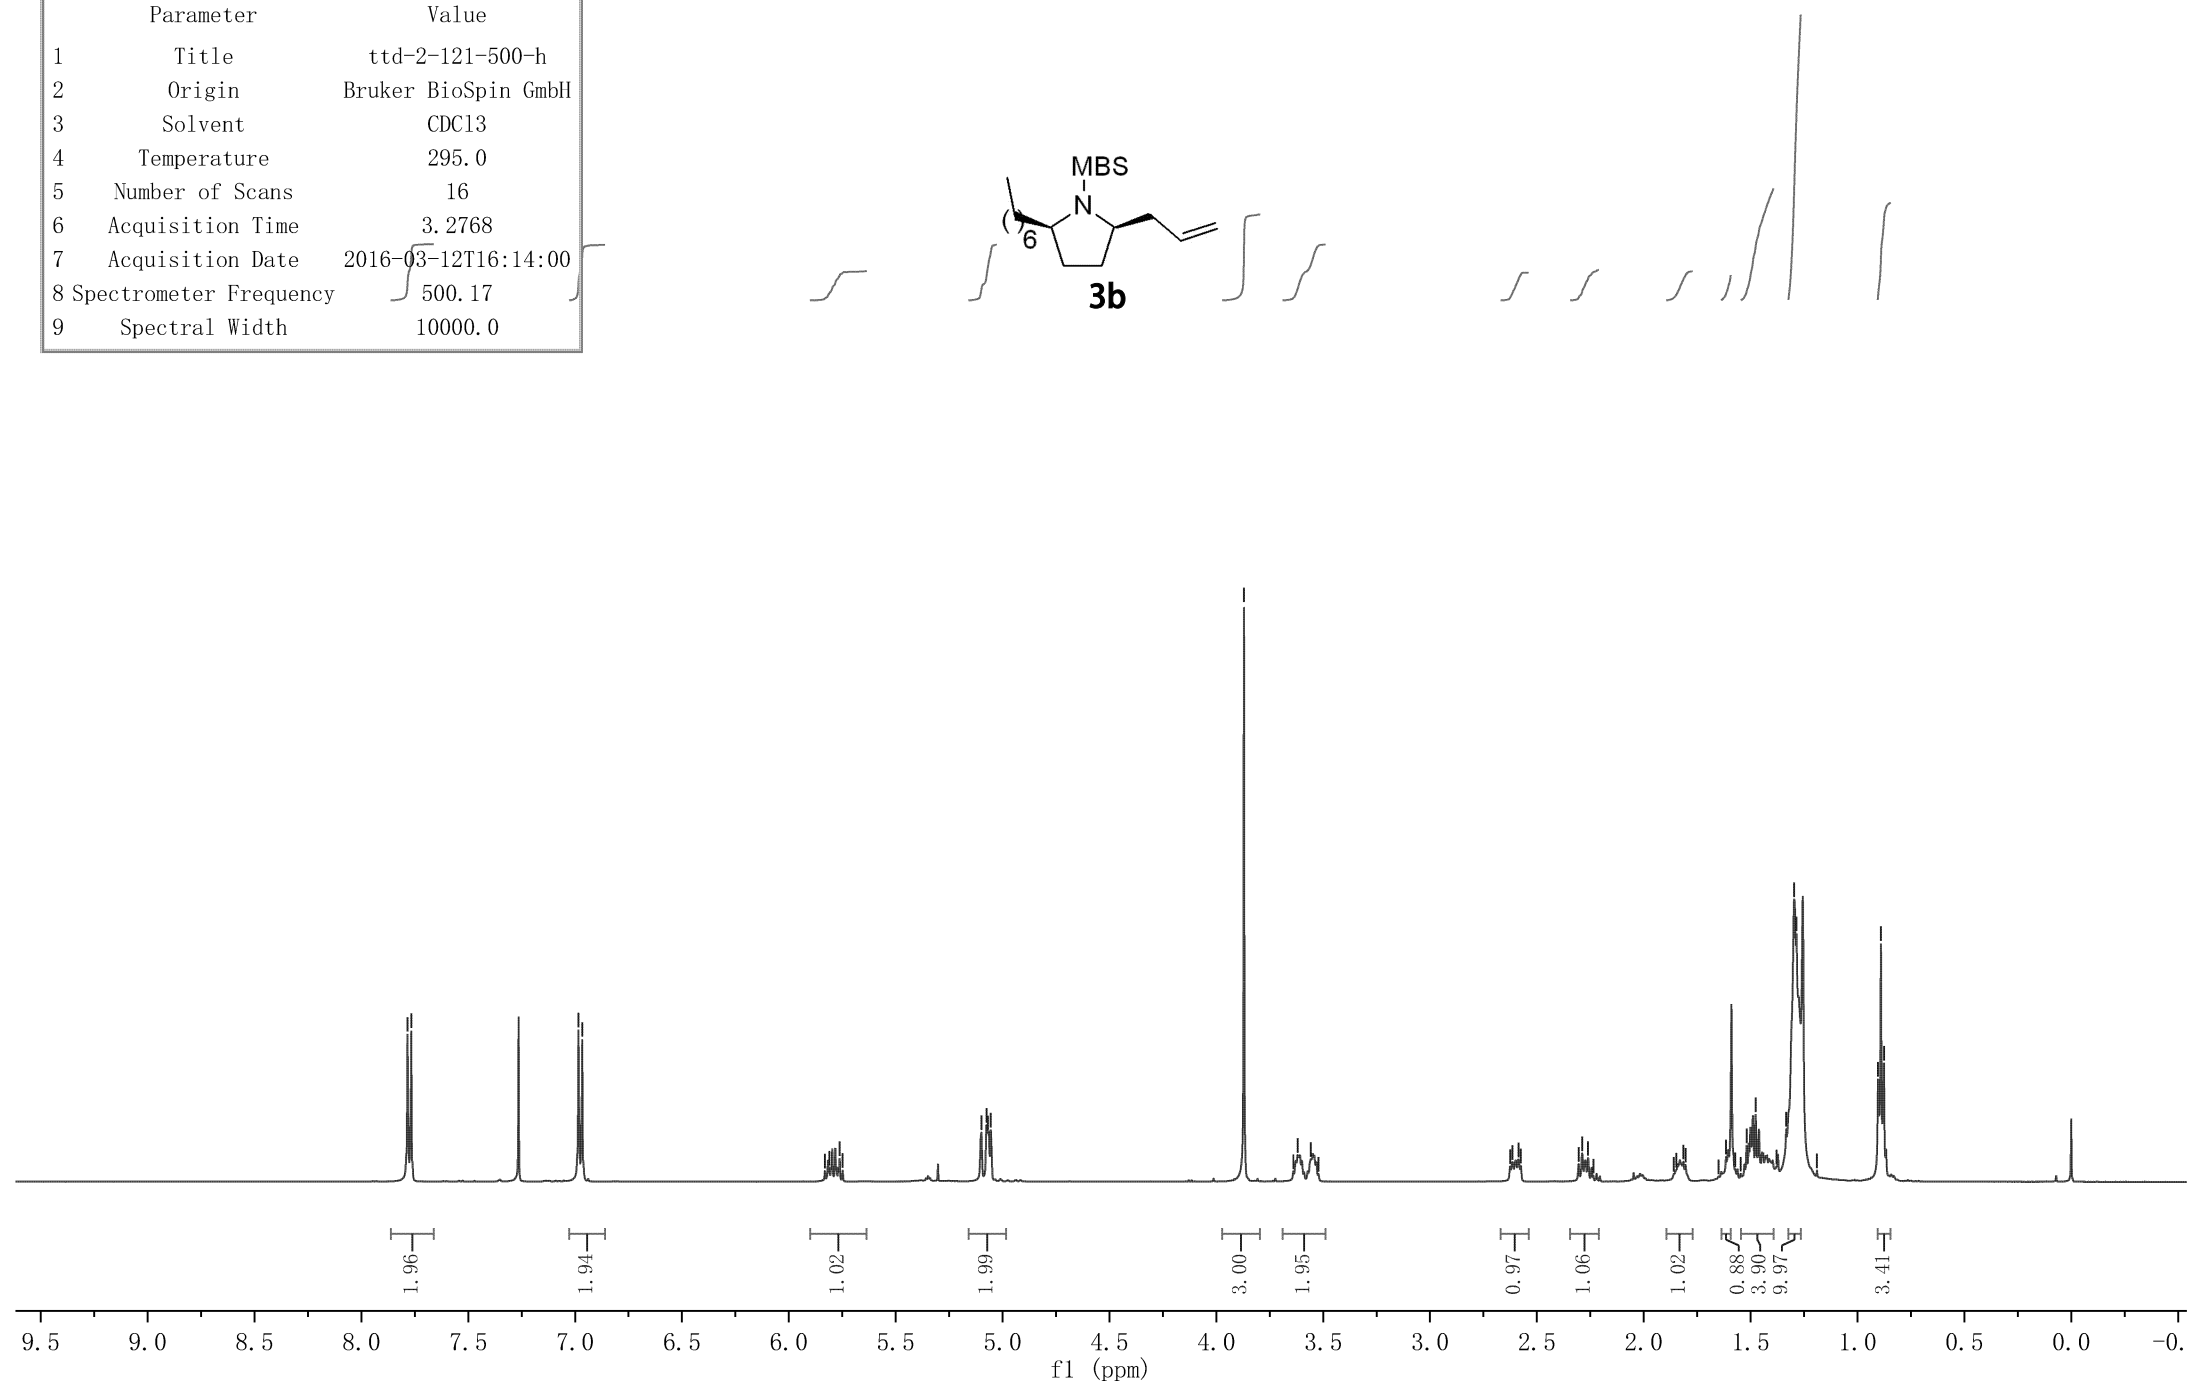

|   | Parameter              | Value               |
|---|------------------------|---------------------|
| 1 | Title                  | ttd-2-121-500-c     |
| 2 | Origin                 | Bruker BioSpin GmbH |
| 3 | Solvent                | CDC13               |
| 4 | Temperature            | 295.0               |
| 5 | Number of Scans        | 512                 |
| 6 | Acquisition Time       | 1.1010              |
| 7 | Acquisition Date       | 2016-03-12T16:43:00 |
| 8 | Spectrometer Frequency | 125.77              |
| 9 | Spectral Width         | 29761.9             |

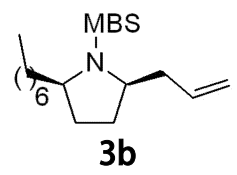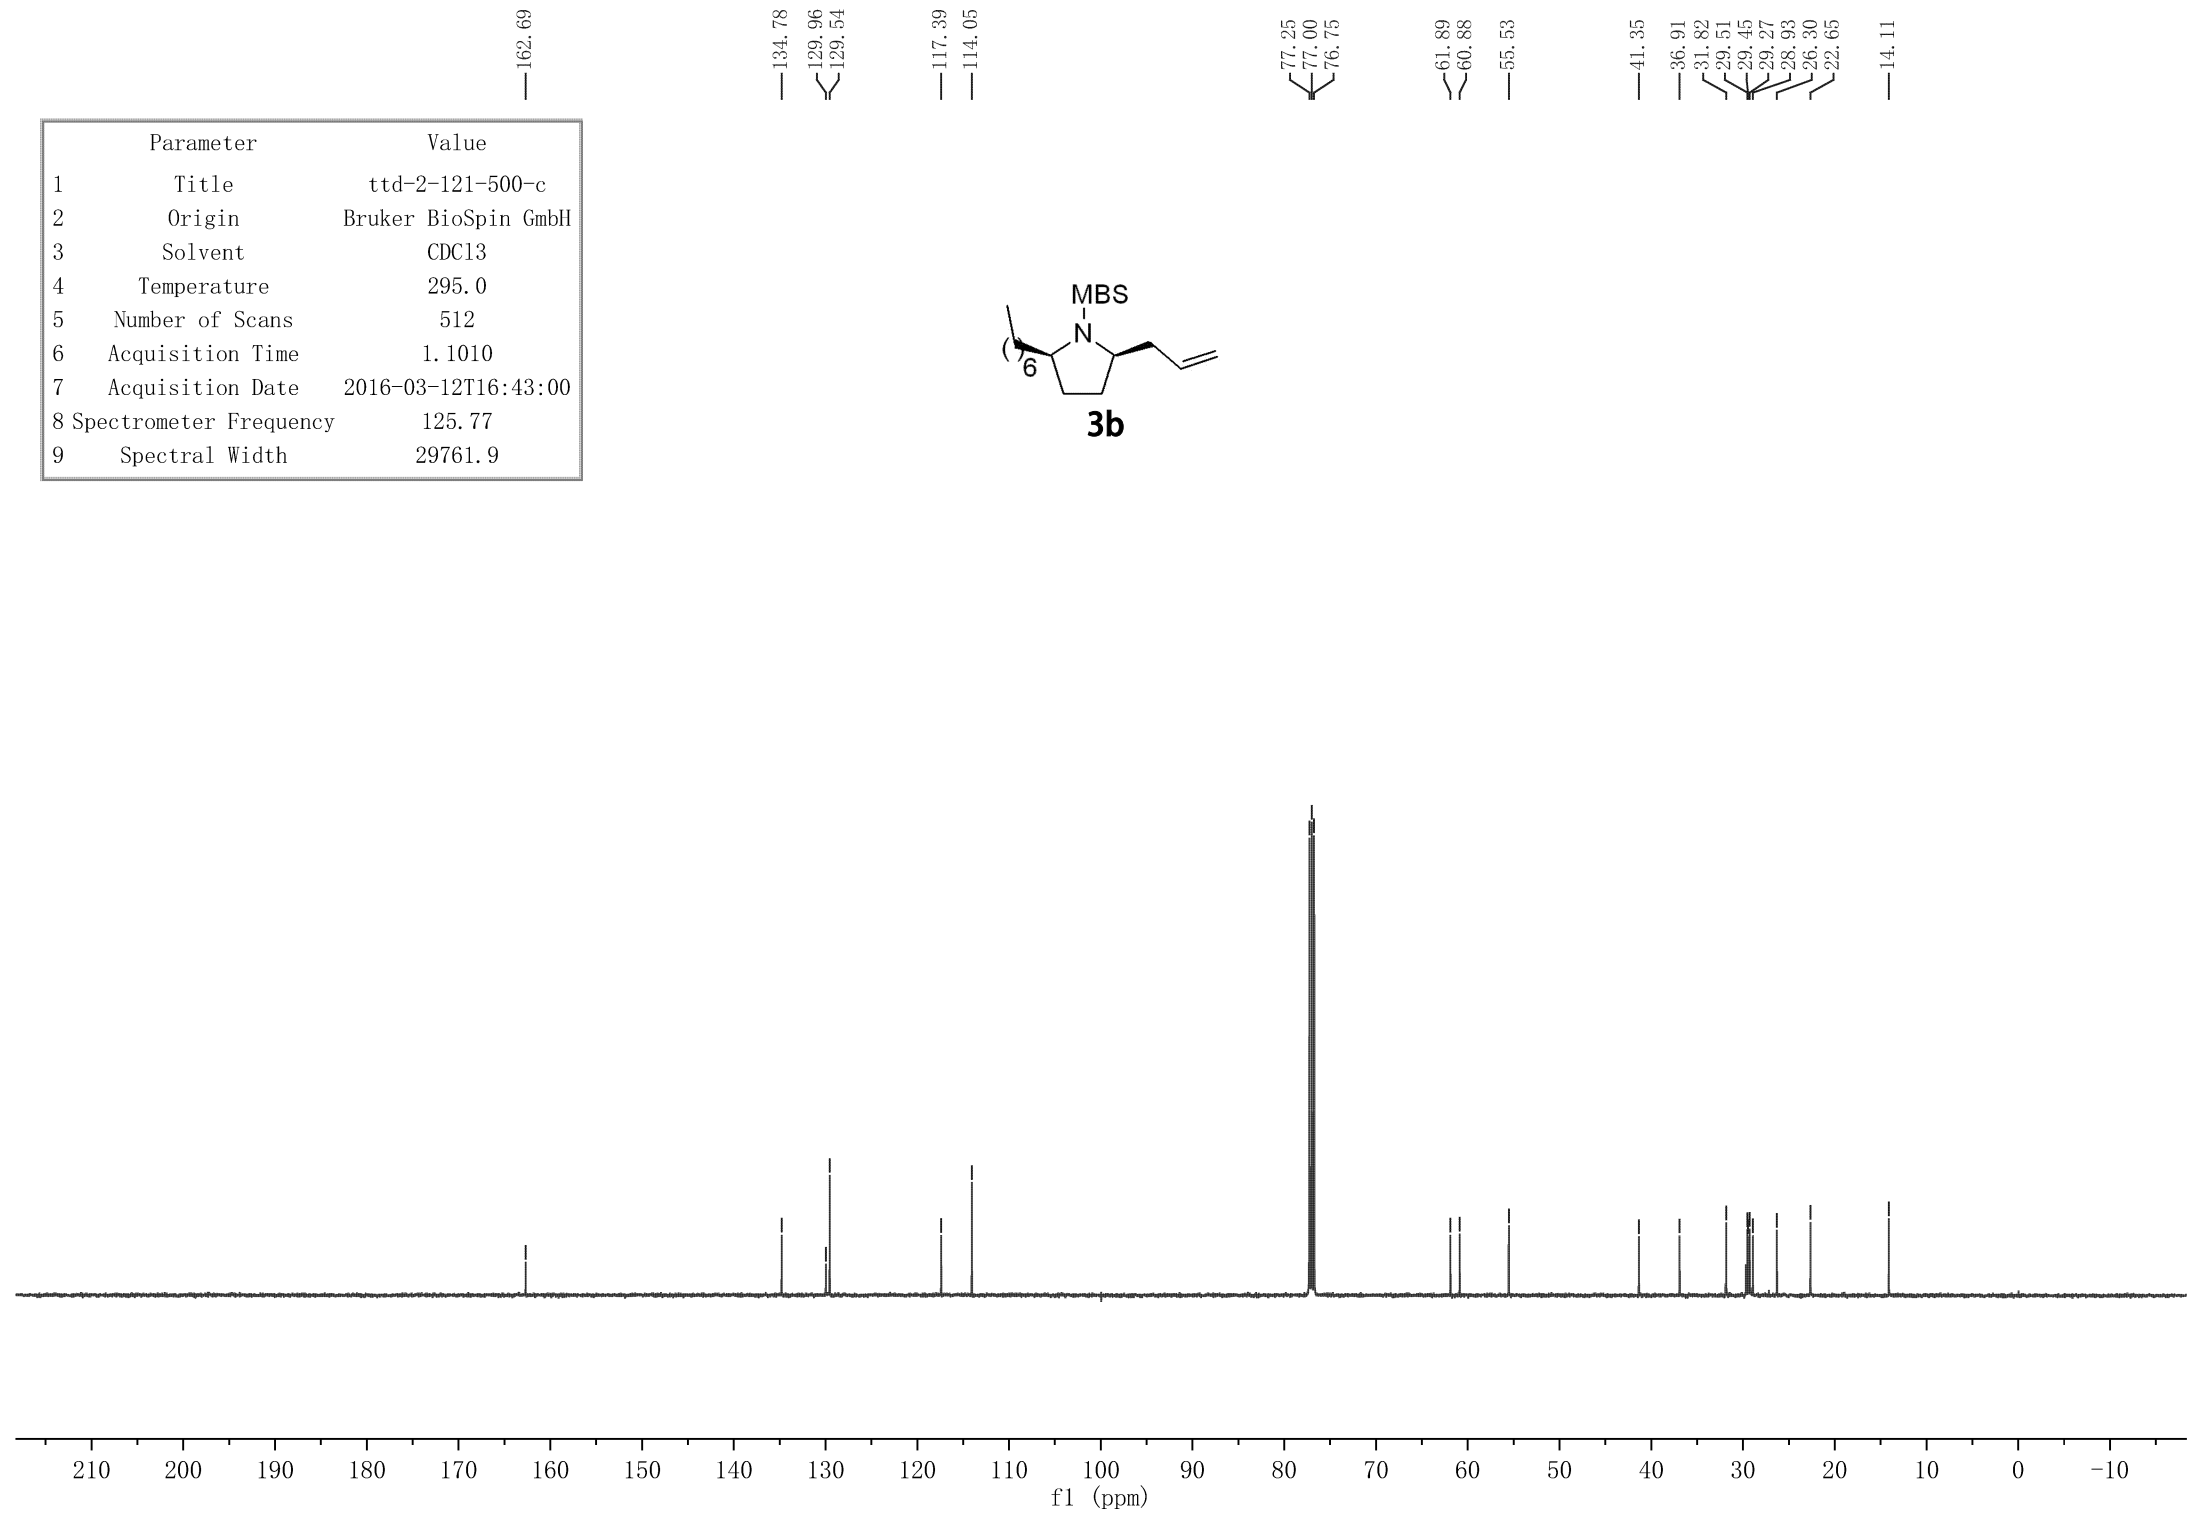

| Parameter                | Value               |
|--------------------------|---------------------|
| 1 Title                  | ttd-2-76-500-h      |
| 2 Origin                 | Bruker BioSpin GmbH |
| 3 Solvent                | CDC13               |
| 4 Temperature            | 295.0               |
| 5 Number of Scans        | 16                  |
| 6 Acquisition Time       | 3.2768              |
| 7 Acquisition Date       | 2016-02-19T20:07:00 |
| 8 Spectrometer Frequency | 500.17              |
| 9 Spectral Width         | 10000.0             |

7.638  
7.622  
7.318  
7.303  
7.288  
7.258  
7.229  
7.215  
7.183

5.849  
5.835  
5.786  
5.766

5.147  
5.111  
5.087  
5.068

3.711  
3.659  
3.584  
3.545

2.753  
2.715  
2.695  
2.668  
2.640  
2.630  
2.602  
2.414  
2.342  
2.311  
2.281  
2.248  
2.221  
1.787  
1.733  
1.714  
1.640  
1.621  
1.488  
1.448

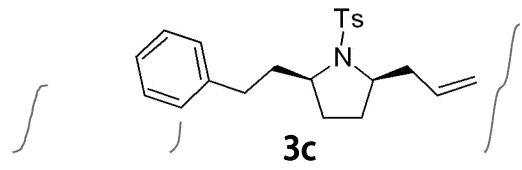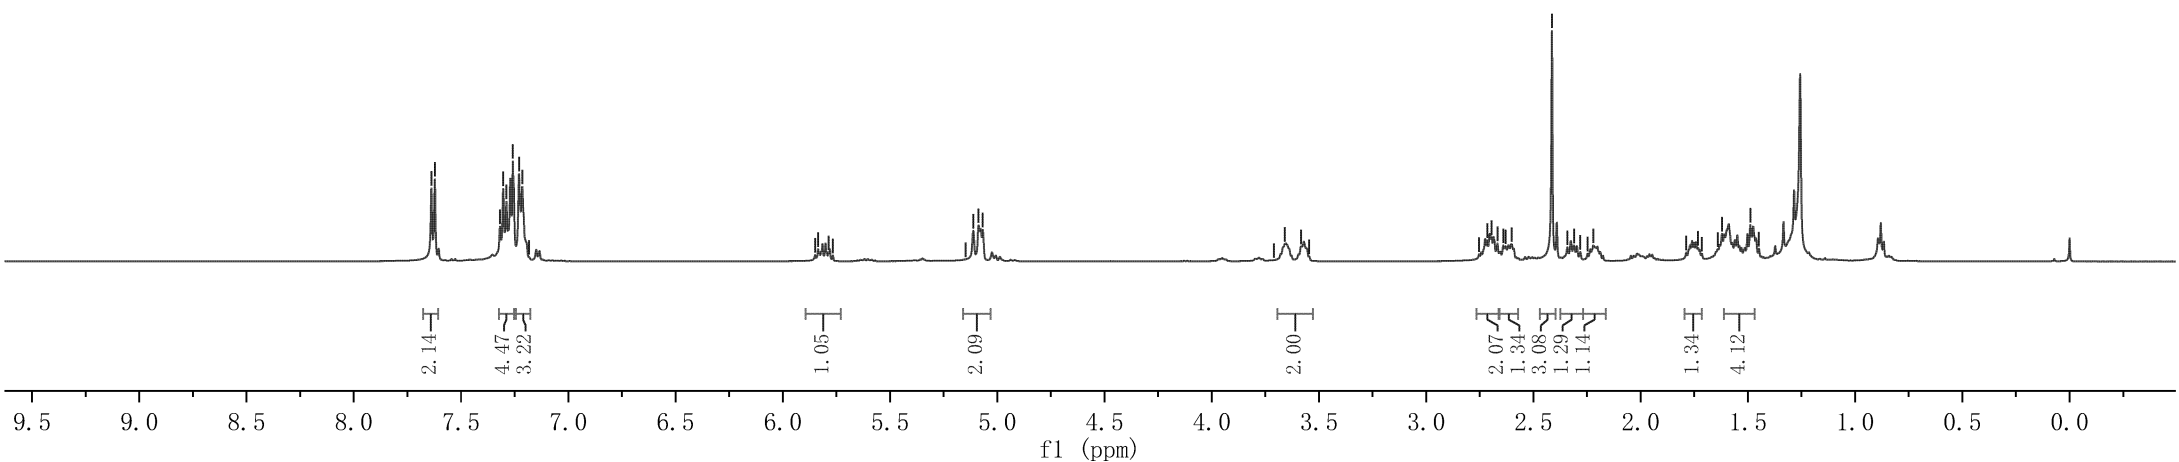

|   | Parameter              | Value               |
|---|------------------------|---------------------|
| 1 | Title                  | ttd-2-76-500-c      |
| 2 | Origin                 | Bruker BioSpin GmbH |
| 3 | Solvent                | CDC13               |
| 4 | Temperature            | 295.0               |
| 5 | Number of Scans        | 256                 |
| 6 | Acquisition Time       | 1.1010              |
| 7 | Acquisition Date       | 2016-02-19T20:22:00 |
| 8 | Spectrometer Frequency | 125.77              |
| 9 | Spectral Width         | 29761.9             |

143.19  
141.64  
134.78  
134.61  
129.55  
128.42  
128.36  
127.55  
125.82  
117.58

77.25  
77.00  
76.75

61.17  
61.05

41.36  
38.22

32.52  
29.59  
28.84

21.49

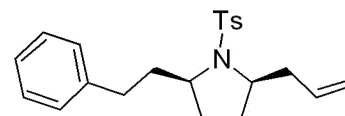

**3c**

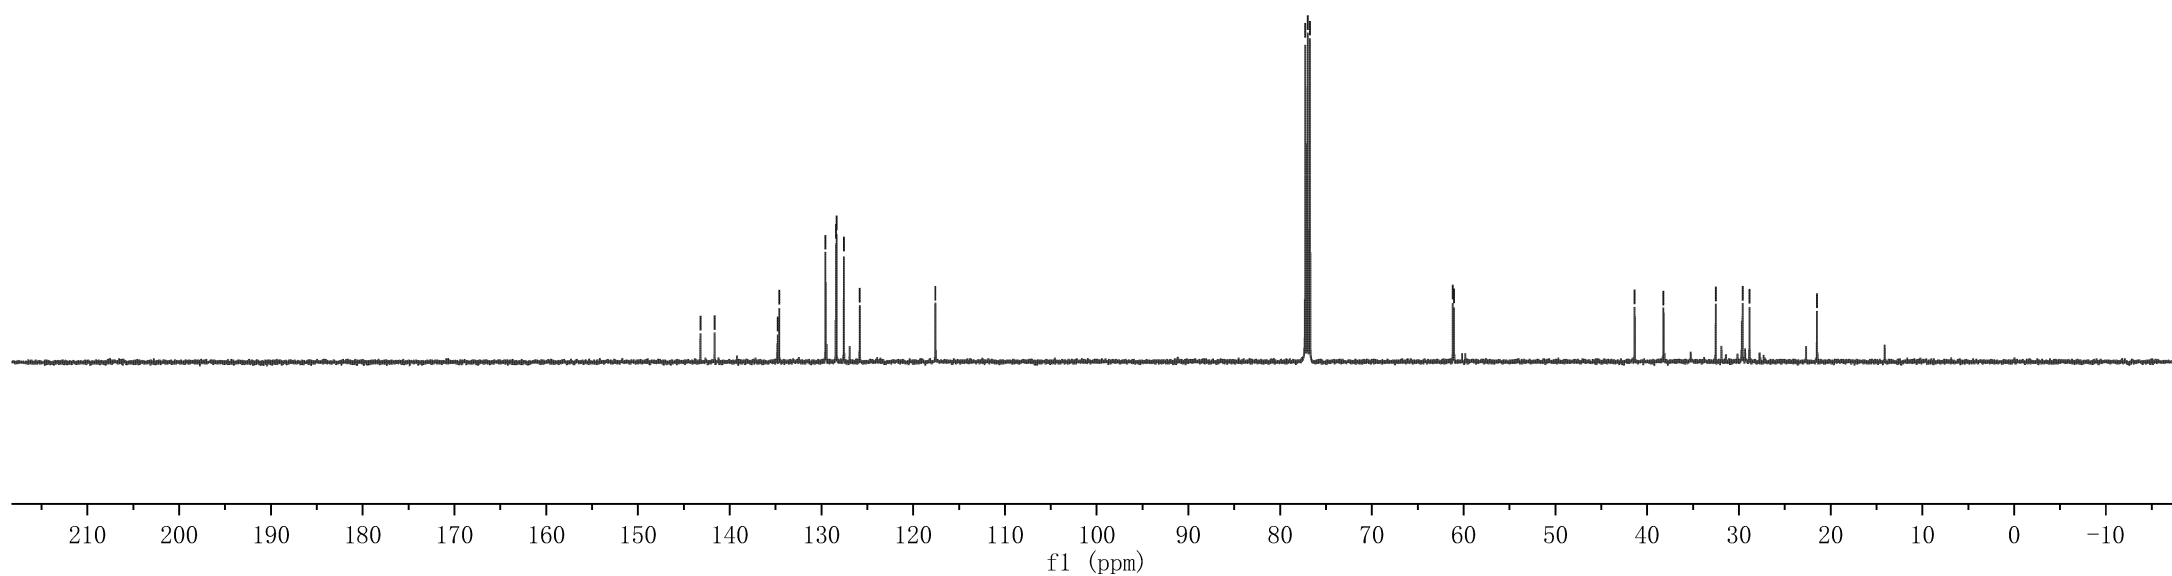

|   | Parameter              | Value               |
|---|------------------------|---------------------|
| 1 | Title                  | ttd-2-79-500-h      |
| 2 | Origin                 | Bruker BioSpin GmbH |
| 3 | Solvent                | CDC13               |
| 4 | Temperature            | 295.1               |
| 5 | Number of Scans        | 16                  |
| 6 | Acquisition Time       | 3.2768              |
| 7 | Acquisition Date       | 2016-02-20T11:18:00 |
| 8 | Spectrometer Frequency | 500.17              |
| 9 | Spectral Width         | 10000.0             |

7.748  
7.732

7.282  
7.265

5.732  
5.712  
5.665  
5.649

5.065  
5.045  
5.030

3.955  
3.937  
3.923  
3.785  
3.780  
3.767  
3.761

2.842  
2.823  
2.822  
2.790

2.413

2.203

2.167

1.991

1.942

1.732

1.680

1.606

1.576

1.496

1.472

1.236

1.216

1.178

1.089

1.065

0.976

0.929

0.880

0.847

0.798

0.726

0.673

0.655

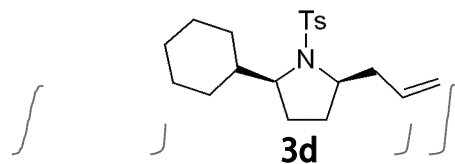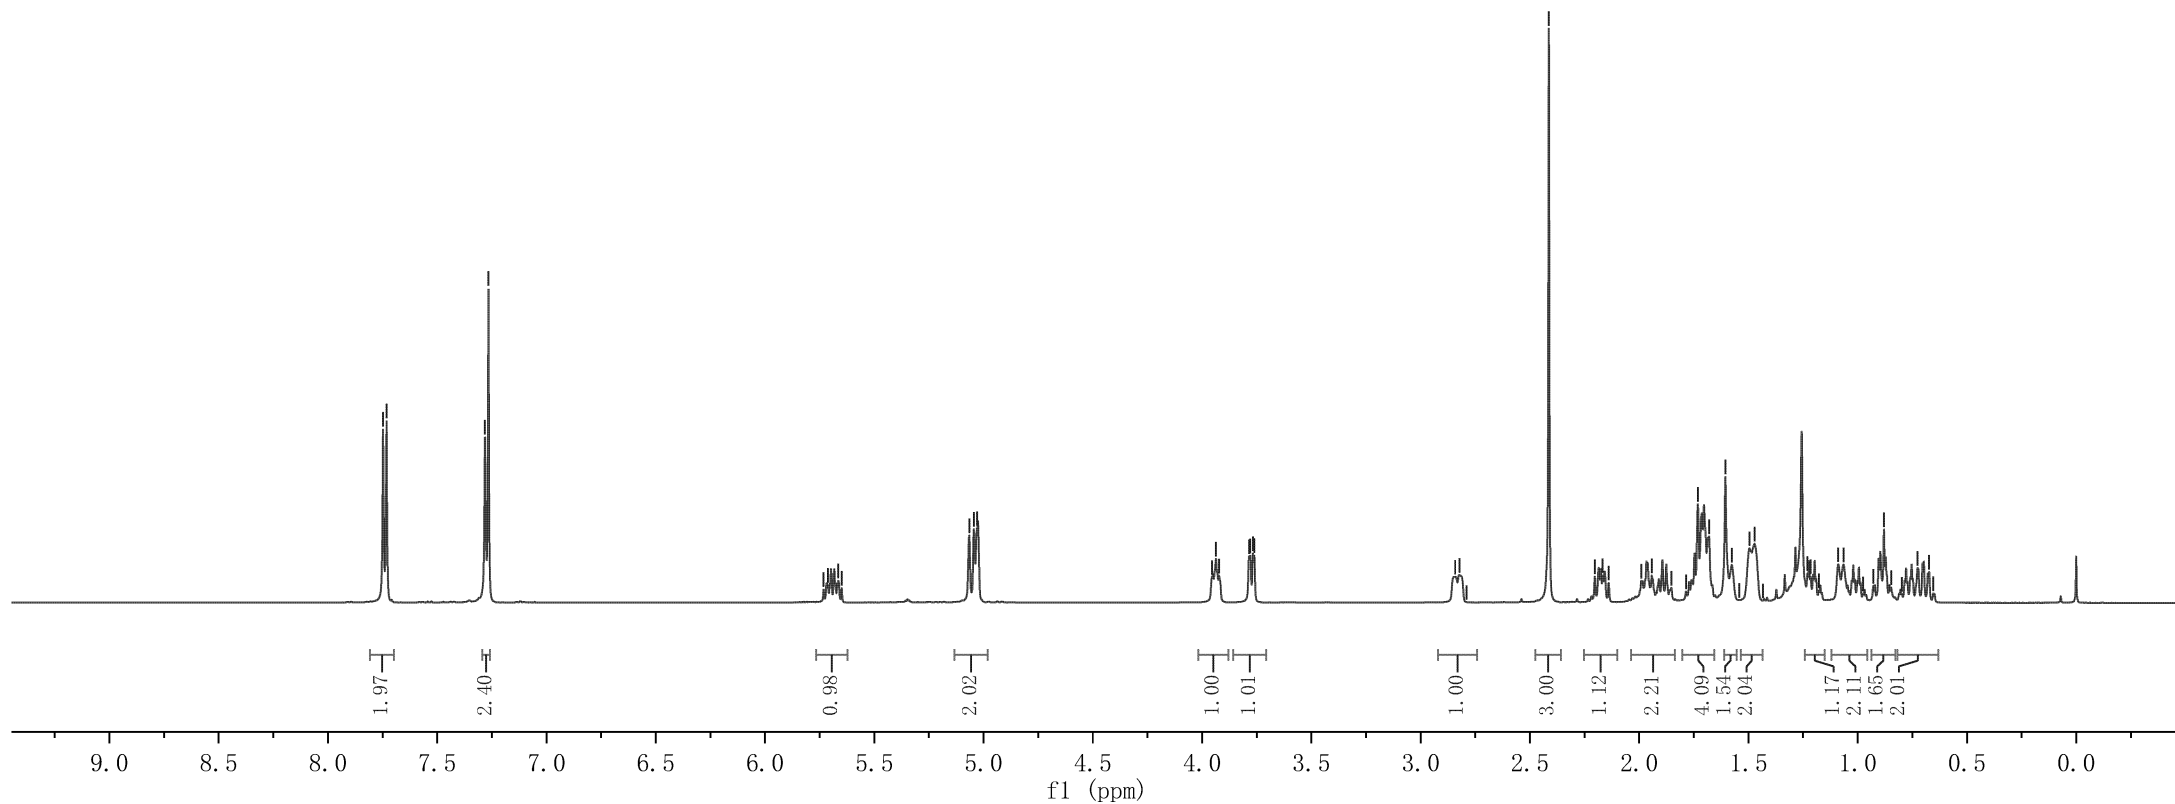

|   | Parameter              | Value               |
|---|------------------------|---------------------|
| 1 | Title                  | ttd-2-79-500-c      |
| 2 | Origin                 | Bruker BioSpin GmbH |
| 3 | Solvent                | CDCl3               |
| 4 | Temperature            | 295.0               |
| 5 | Number of Scans        | 512                 |
| 6 | Acquisition Time       | 1.1010              |
| 7 | Acquisition Date       | 2016-02-20T11:46:00 |
| 8 | Spectrometer Frequency | 125.77              |
| 9 | Spectral Width         | 29761.9             |

<sup>13</sup>C NMR chemical shifts (ppm):  
 142.54, 139.72, 135.12, 129.31, 126.79, 117.37, 77.25, 77.00, 76.75, 64.83, 61.14, 39.98, 38.97, 30.55, 28.86, 26.50, 26.48, 26.32, 25.78, 24.34, 21.44

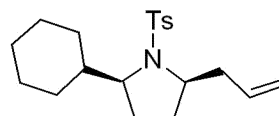

**3d**

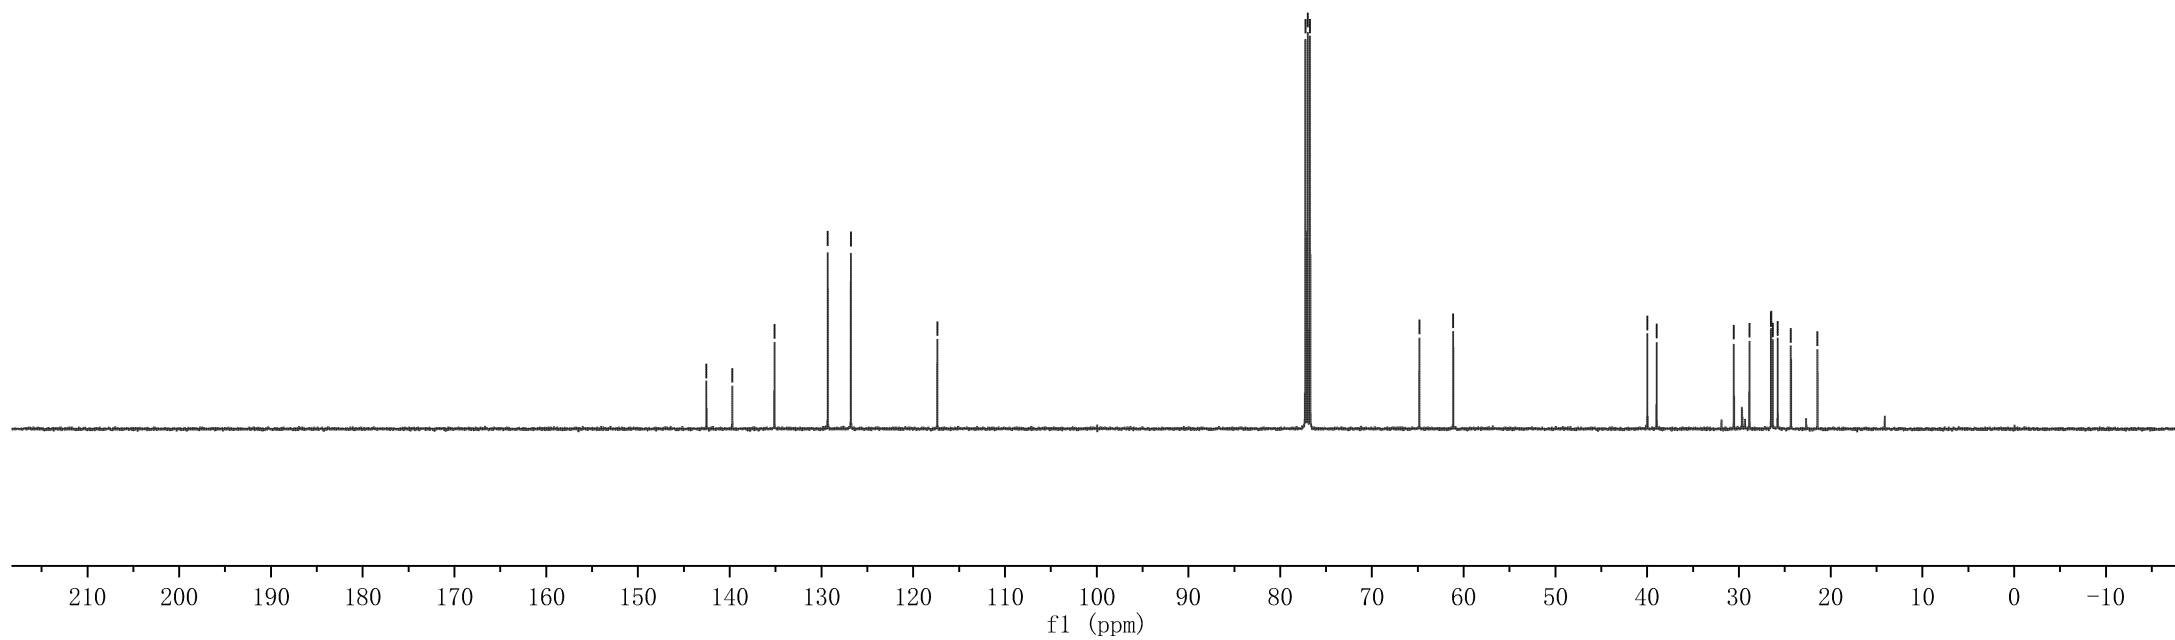

|   | Parameter              | Value               |
|---|------------------------|---------------------|
| 1 | Title                  | ttd-2-82-500-h      |
| 2 | Origin                 | Bruker BioSpin GmbH |
| 3 | Solvent                | CDCl3               |
| 4 | Temperature            | 295.0               |
| 5 | Number of Scans        | 16                  |
| 6 | Acquisition Time       | 3.2768              |
| 7 | Acquisition Date       | 2016-02-22T20:51:00 |
| 8 | Spectrometer Frequency | 500.17              |
| 9 | Spectral Width         | 10000.0             |

7.346  
7.330  
7.147  
7.119  
7.100  
7.083  
7.045  
7.029  
6.992  
6.979  
6.976

5.797  
5.768  
5.742  
5.714

5.115  
5.089  
5.079  
5.070  
4.984  
4.968

4.188  
4.182  
4.147

2.898  
2.871  
2.861

2.400  
2.376  
2.330  
2.309  
2.291  
2.274  
2.269  
1.835  
1.809  
1.707  
1.692  
1.668

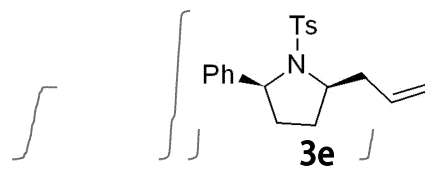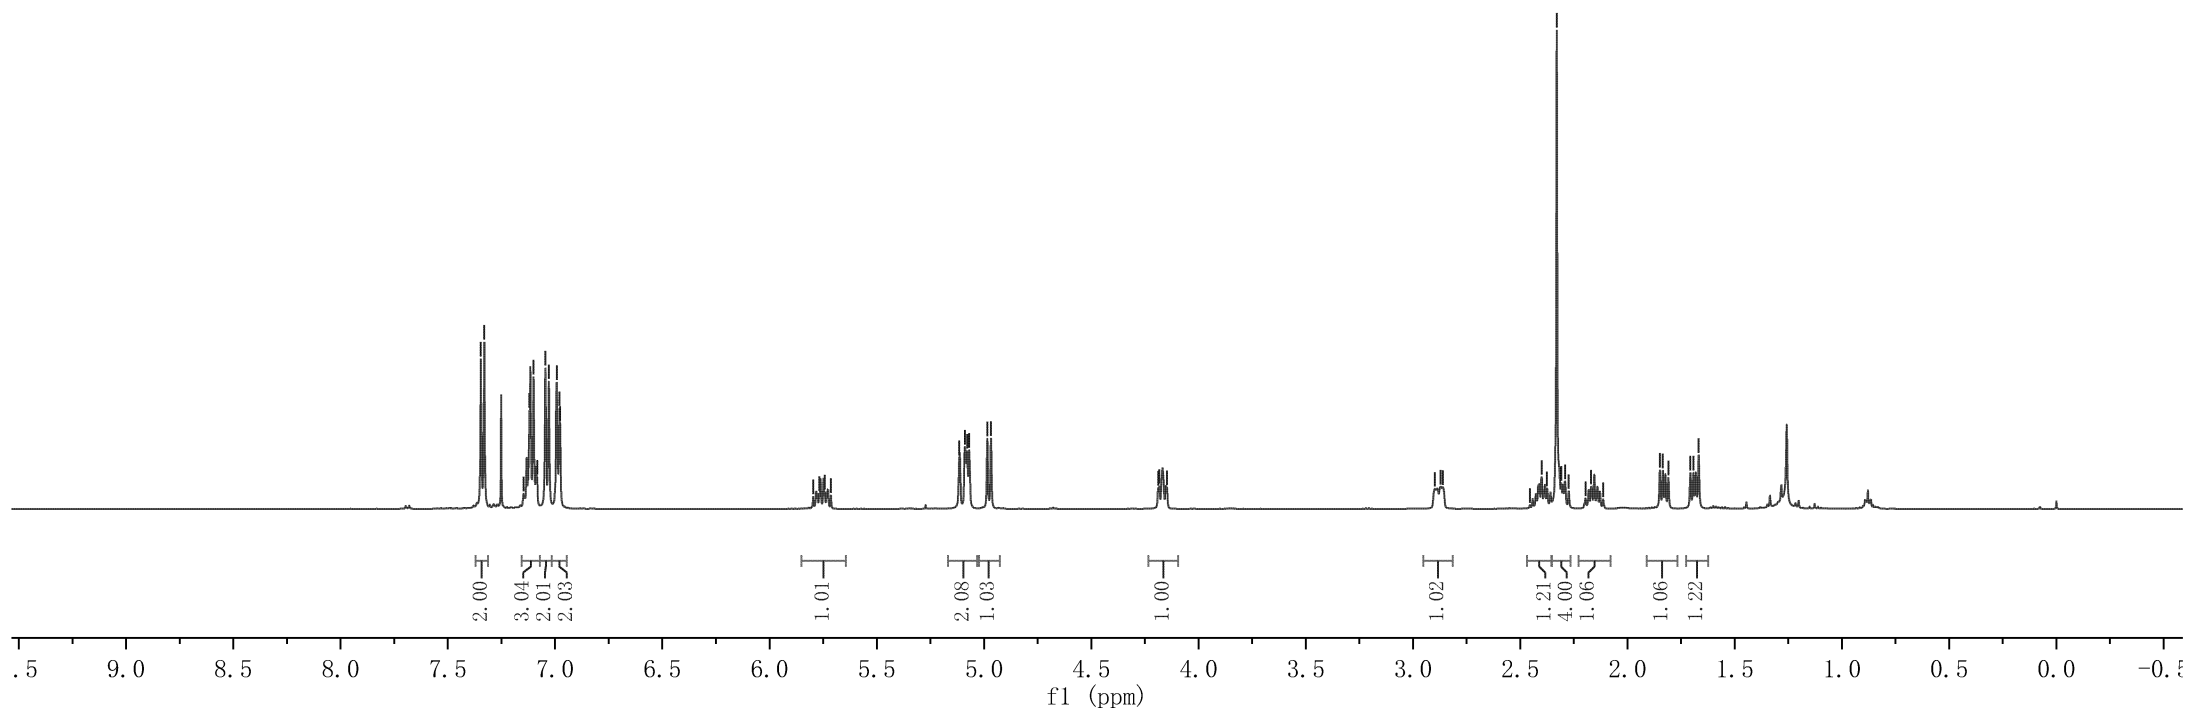

|   | Parameter              | Value               |
|---|------------------------|---------------------|
| 1 | Title                  | ttd-2-82-500-c      |
| 2 | Origin                 | Bruker BioSpin GmbH |
| 3 | Solvent                | CDC13               |
| 4 | Temperature            | 295.0               |
| 5 | Number of Scans        | 512                 |
| 6 | Acquisition Time       | 1.1010              |
| 7 | Acquisition Date       | 2016-02-22T21:19:00 |
| 8 | Spectrometer Frequency | 125.77              |
| 9 | Spectral Width         | 29761.9             |

142.31  
142.23  
138.61  
134.76  
128.90  
127.95  
126.82  
126.75  
126.50  
117.66

77.25  
77.00  
76.75

64.04  
60.74

39.14

33.00

27.52

21.31

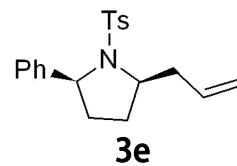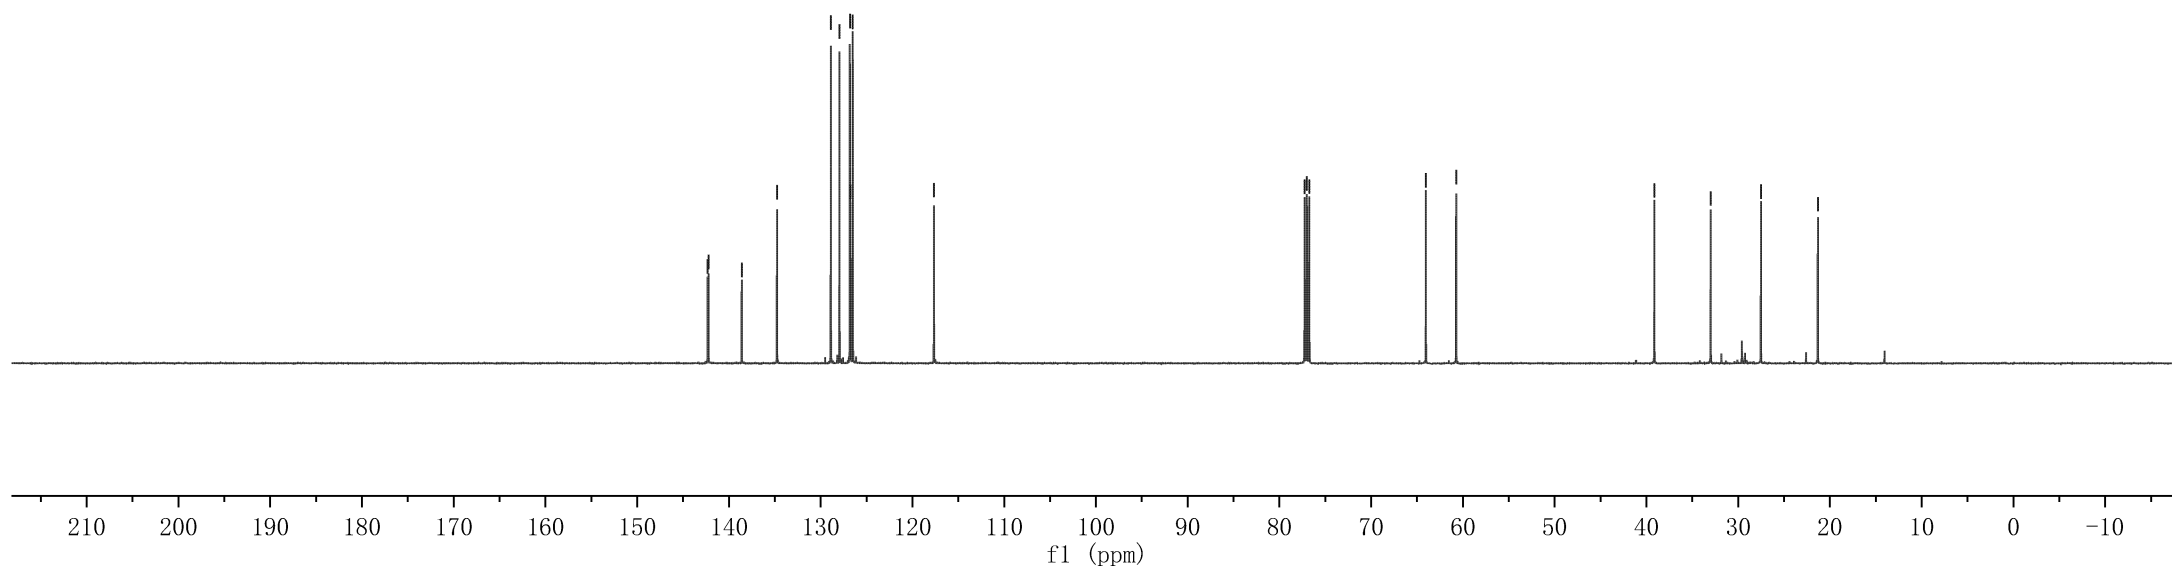

7.352  
7.336  
7.046  
7.030  
6.919  
6.903  
6.887  
6.871

5.790  
5.756  
5.722  
5.708

5.107  
5.084  
5.073  
5.065  
4.938  
4.921

4.178  
4.163  
4.143

2.882  
2.873  
2.856  
2.847

2.397  
2.341  
2.321  
2.301  
2.273  
2.259  
2.242  
1.828  
1.802  
1.698  
1.684  
1.659

| Parameter                | Value               |
|--------------------------|---------------------|
| 1 Title                  | ttd-2-73-500-h      |
| 2 Origin                 | Bruker BioSpin GmbH |
| 3 Solvent                | CDC13               |
| 4 Temperature            | 295.0               |
| 5 Number of Scans        | 16                  |
| 6 Acquisition Time       | 3.2768              |
| 7 Acquisition Date       | 2016-02-17T22:15:00 |
| 8 Spectrometer Frequency | 500.17              |
| 9 Spectral Width         | 10000.0             |

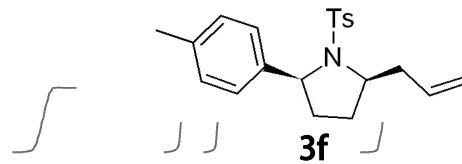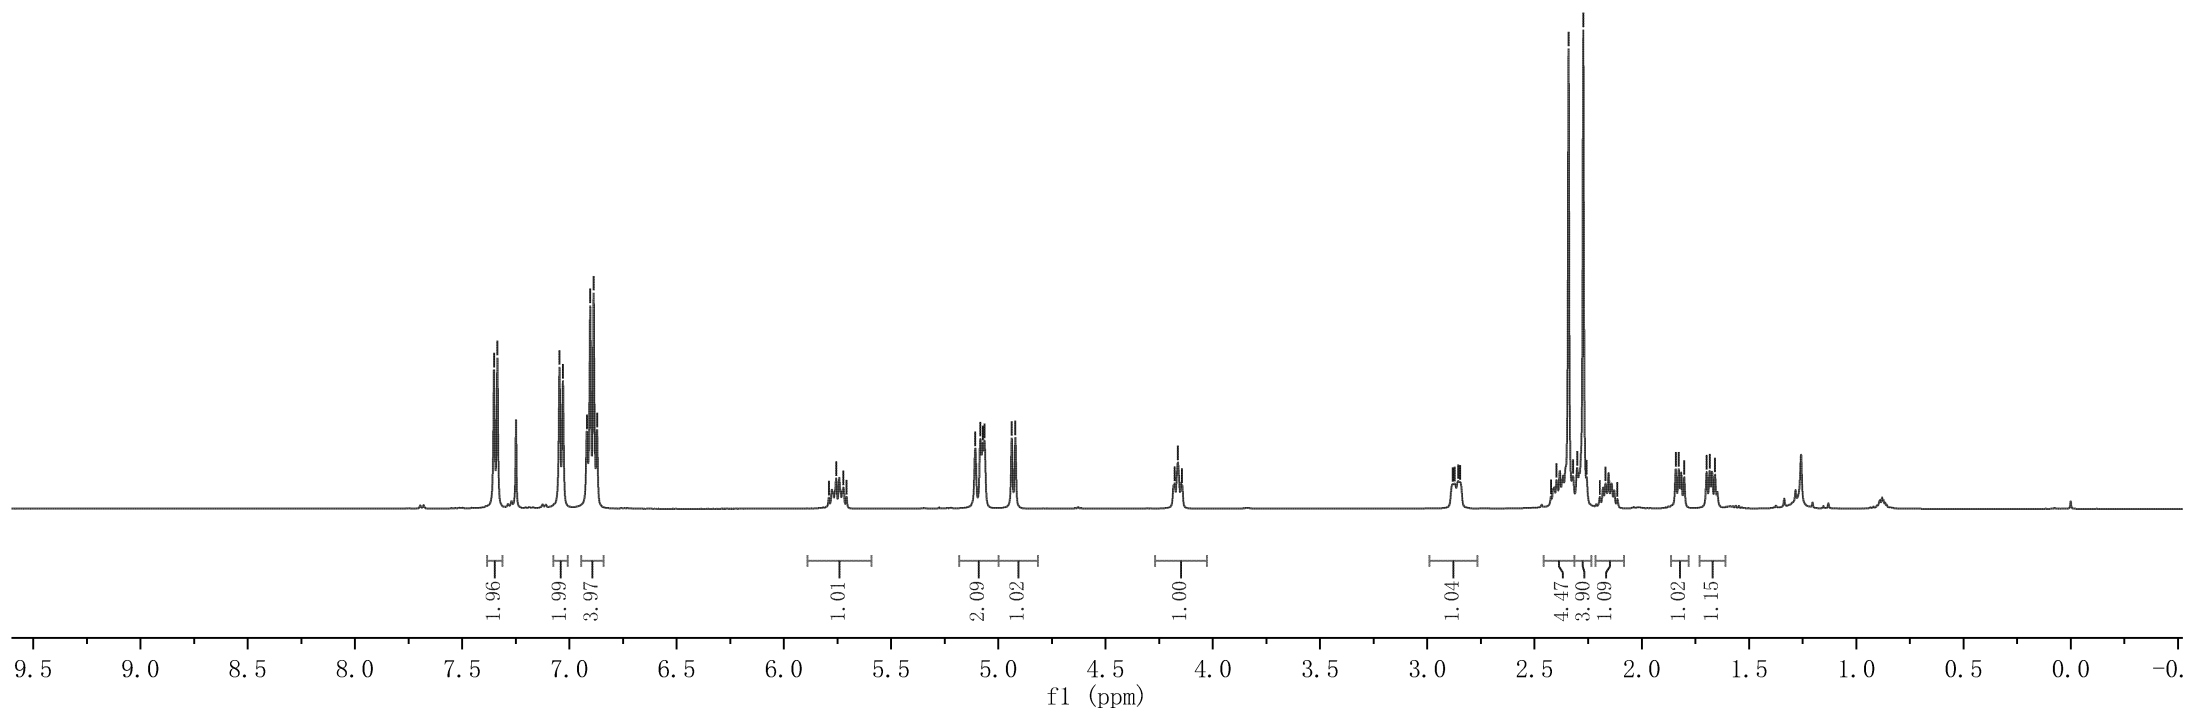



| Parameter                | Value               |
|--------------------------|---------------------|
| 1 Title                  | ttd-2-84-1-500-h    |
| 2 Origin                 | Bruker BioSpin GmbH |
| 3 Solvent                | CDC13               |
| 4 Temperature            | 295.0               |
| 5 Number of Scans        | 16                  |
| 6 Acquisition Time       | 3.2768              |
| 7 Acquisition Date       | 2016-02-23T16:52:00 |
| 8 Spectrometer Frequency | 500.17              |
| 9 Spectral Width         | 10000.0             |

7.688  
7.672

7.292  
7.275  
7.260

6.855  
6.838

5.848  
5.814  
5.786  
5.765

5.124  
5.090  
5.084  
5.063

4.643  
4.629  
4.615

3.878  
3.858  
3.836  
3.798

2.845  
2.821  
2.806

2.796  
2.424

2.369  
2.342  
2.325

2.307  
1.896  
1.861  
1.834

1.822  
1.625  
1.612  
1.598  
1.582

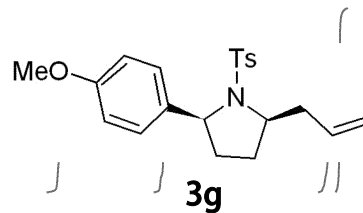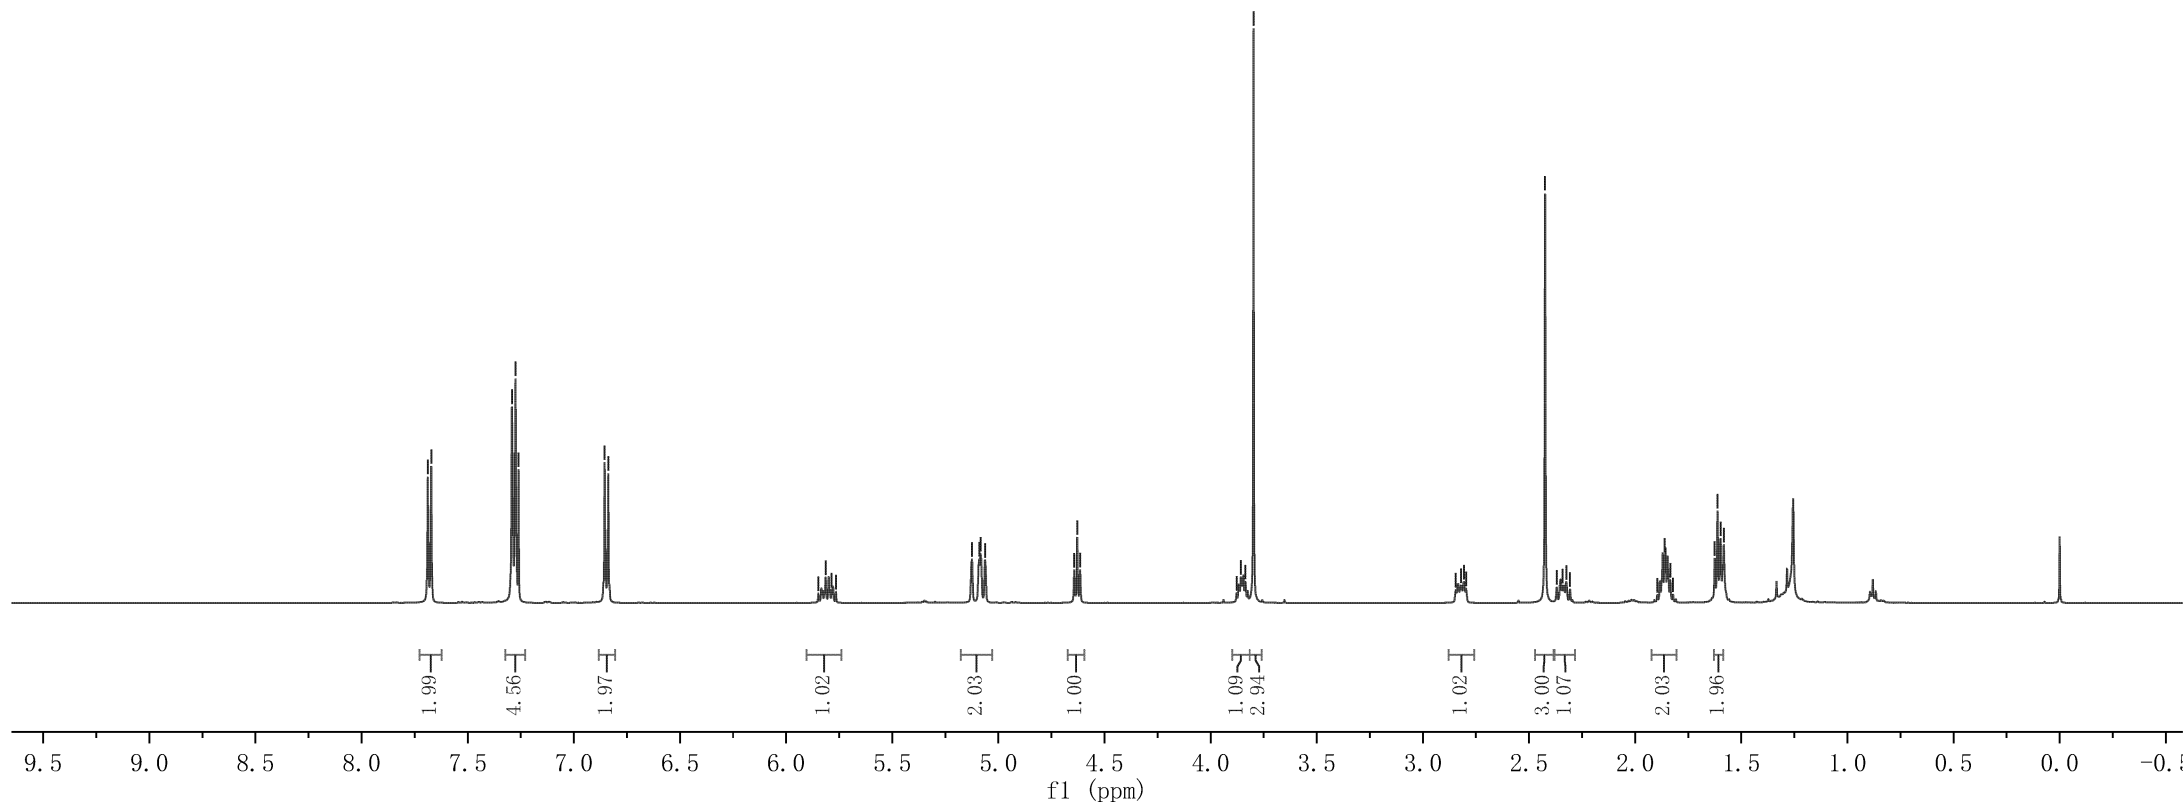

|   | Parameter              | Value               |
|---|------------------------|---------------------|
| 1 | Title                  | ttd-2-84-1-500-c    |
| 2 | Origin                 | Bruker BioSpin GmbH |
| 3 | Solvent                | CDC13               |
| 4 | Temperature            | 295.0               |
| 5 | Number of Scans        | 512                 |
| 6 | Acquisition Time       | 1.1010              |
| 7 | Acquisition Date       | 2016-02-23T17:20:00 |
| 8 | Spectrometer Frequency | 125.77              |
| 9 | Spectral Width         | 29761.9             |

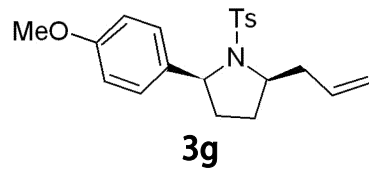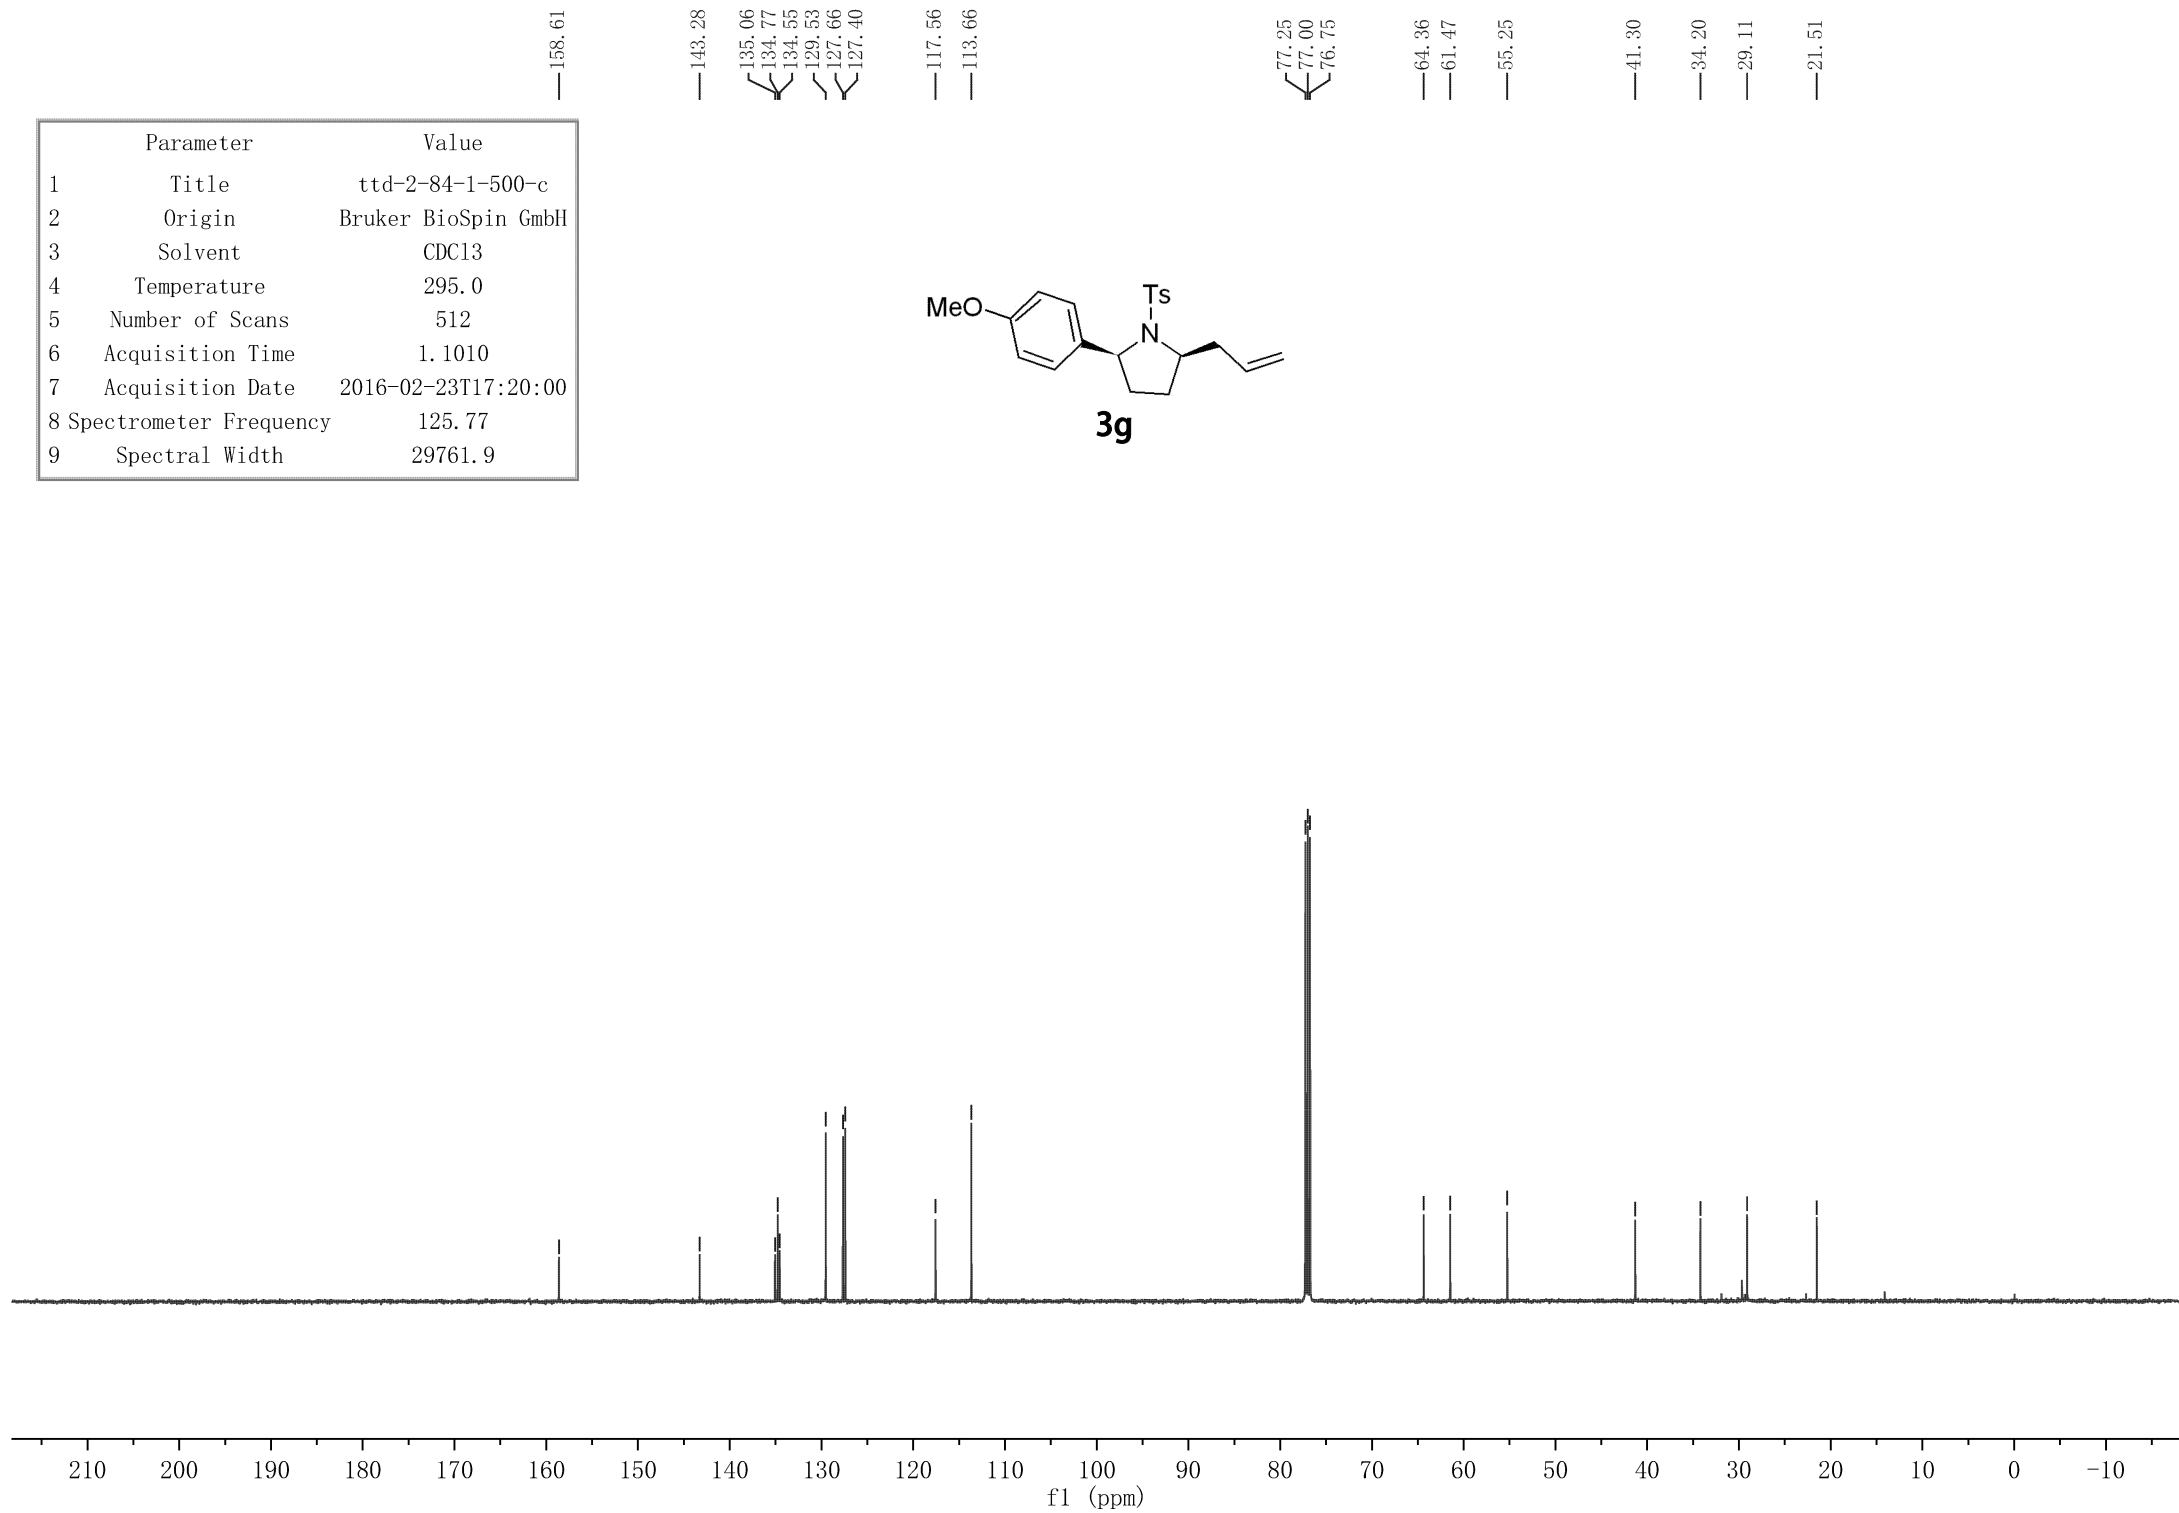

|   | Parameter              | Value               |
|---|------------------------|---------------------|
| 1 | Title                  | ttd-2-71-500-h      |
| 2 | Origin                 | Bruker BioSpin GmbH |
| 3 | Solvent                | CDC13               |
| 4 | Temperature            | 295.0               |
| 5 | Number of Scans        | 16                  |
| 6 | Acquisition Time       | 3.2768              |
| 7 | Acquisition Date       | 2016-02-17T15:44:00 |
| 8 | Spectrometer Frequency | 500.17              |
| 9 | Spectral Width         | 10000.0             |

7.355  
7.339  
7.078  
7.063  
6.970  
6.956  
6.944  
6.800  
6.784  
6.768

5.792  
5.778  
5.724  
5.709

5.118  
5.095  
5.078  
4.959  
4.942

4.193  
4.177  
4.161

2.948  
2.879  
2.861

2.448  
2.407  
2.348  
2.268  
2.166  
2.139  
2.111  
2.067  
1.842  
1.827  
1.685  
1.670  
1.646

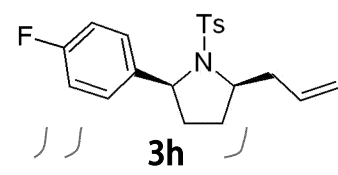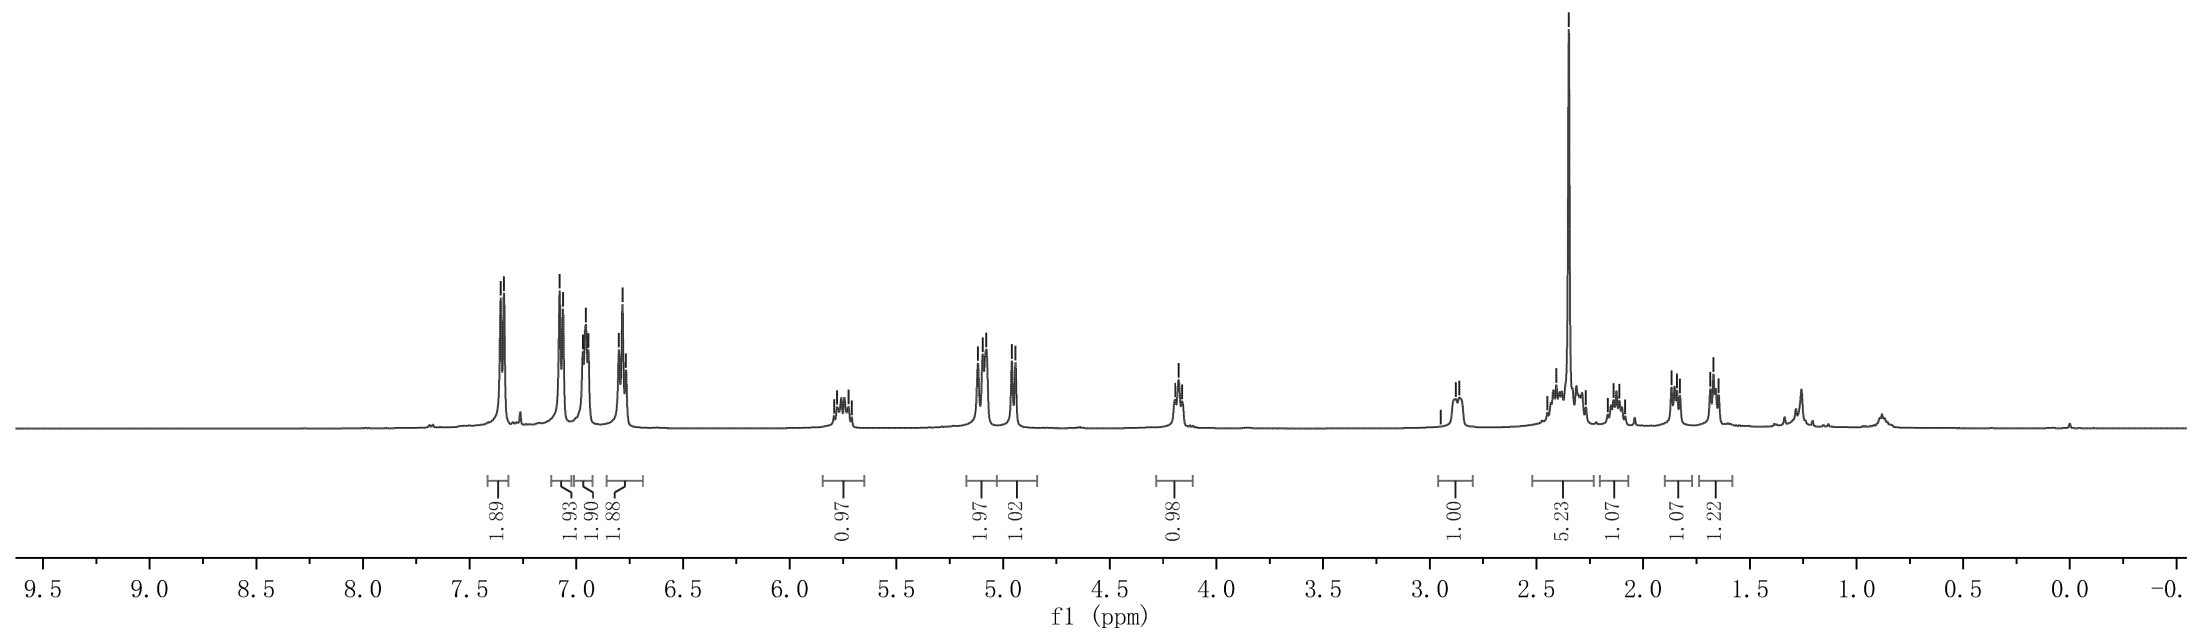

|   | Parameter              | Value               |
|---|------------------------|---------------------|
| 1 | Title                  | ttd-2-71-500-c      |
| 2 | Origin                 | Bruker BioSpin GmbH |
| 3 | Solvent                | CDC13               |
| 4 | Temperature            | 295.0               |
| 5 | Number of Scans        | 528                 |
| 6 | Acquisition Time       | 1.1010              |
| 7 | Acquisition Date       | 2016-02-17T16:13:00 |
| 8 | Spectrometer Frequency | 125.77              |
| 9 | Spectral Width         | 29761.9             |

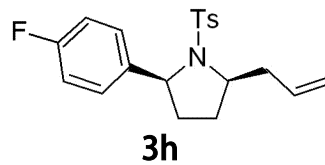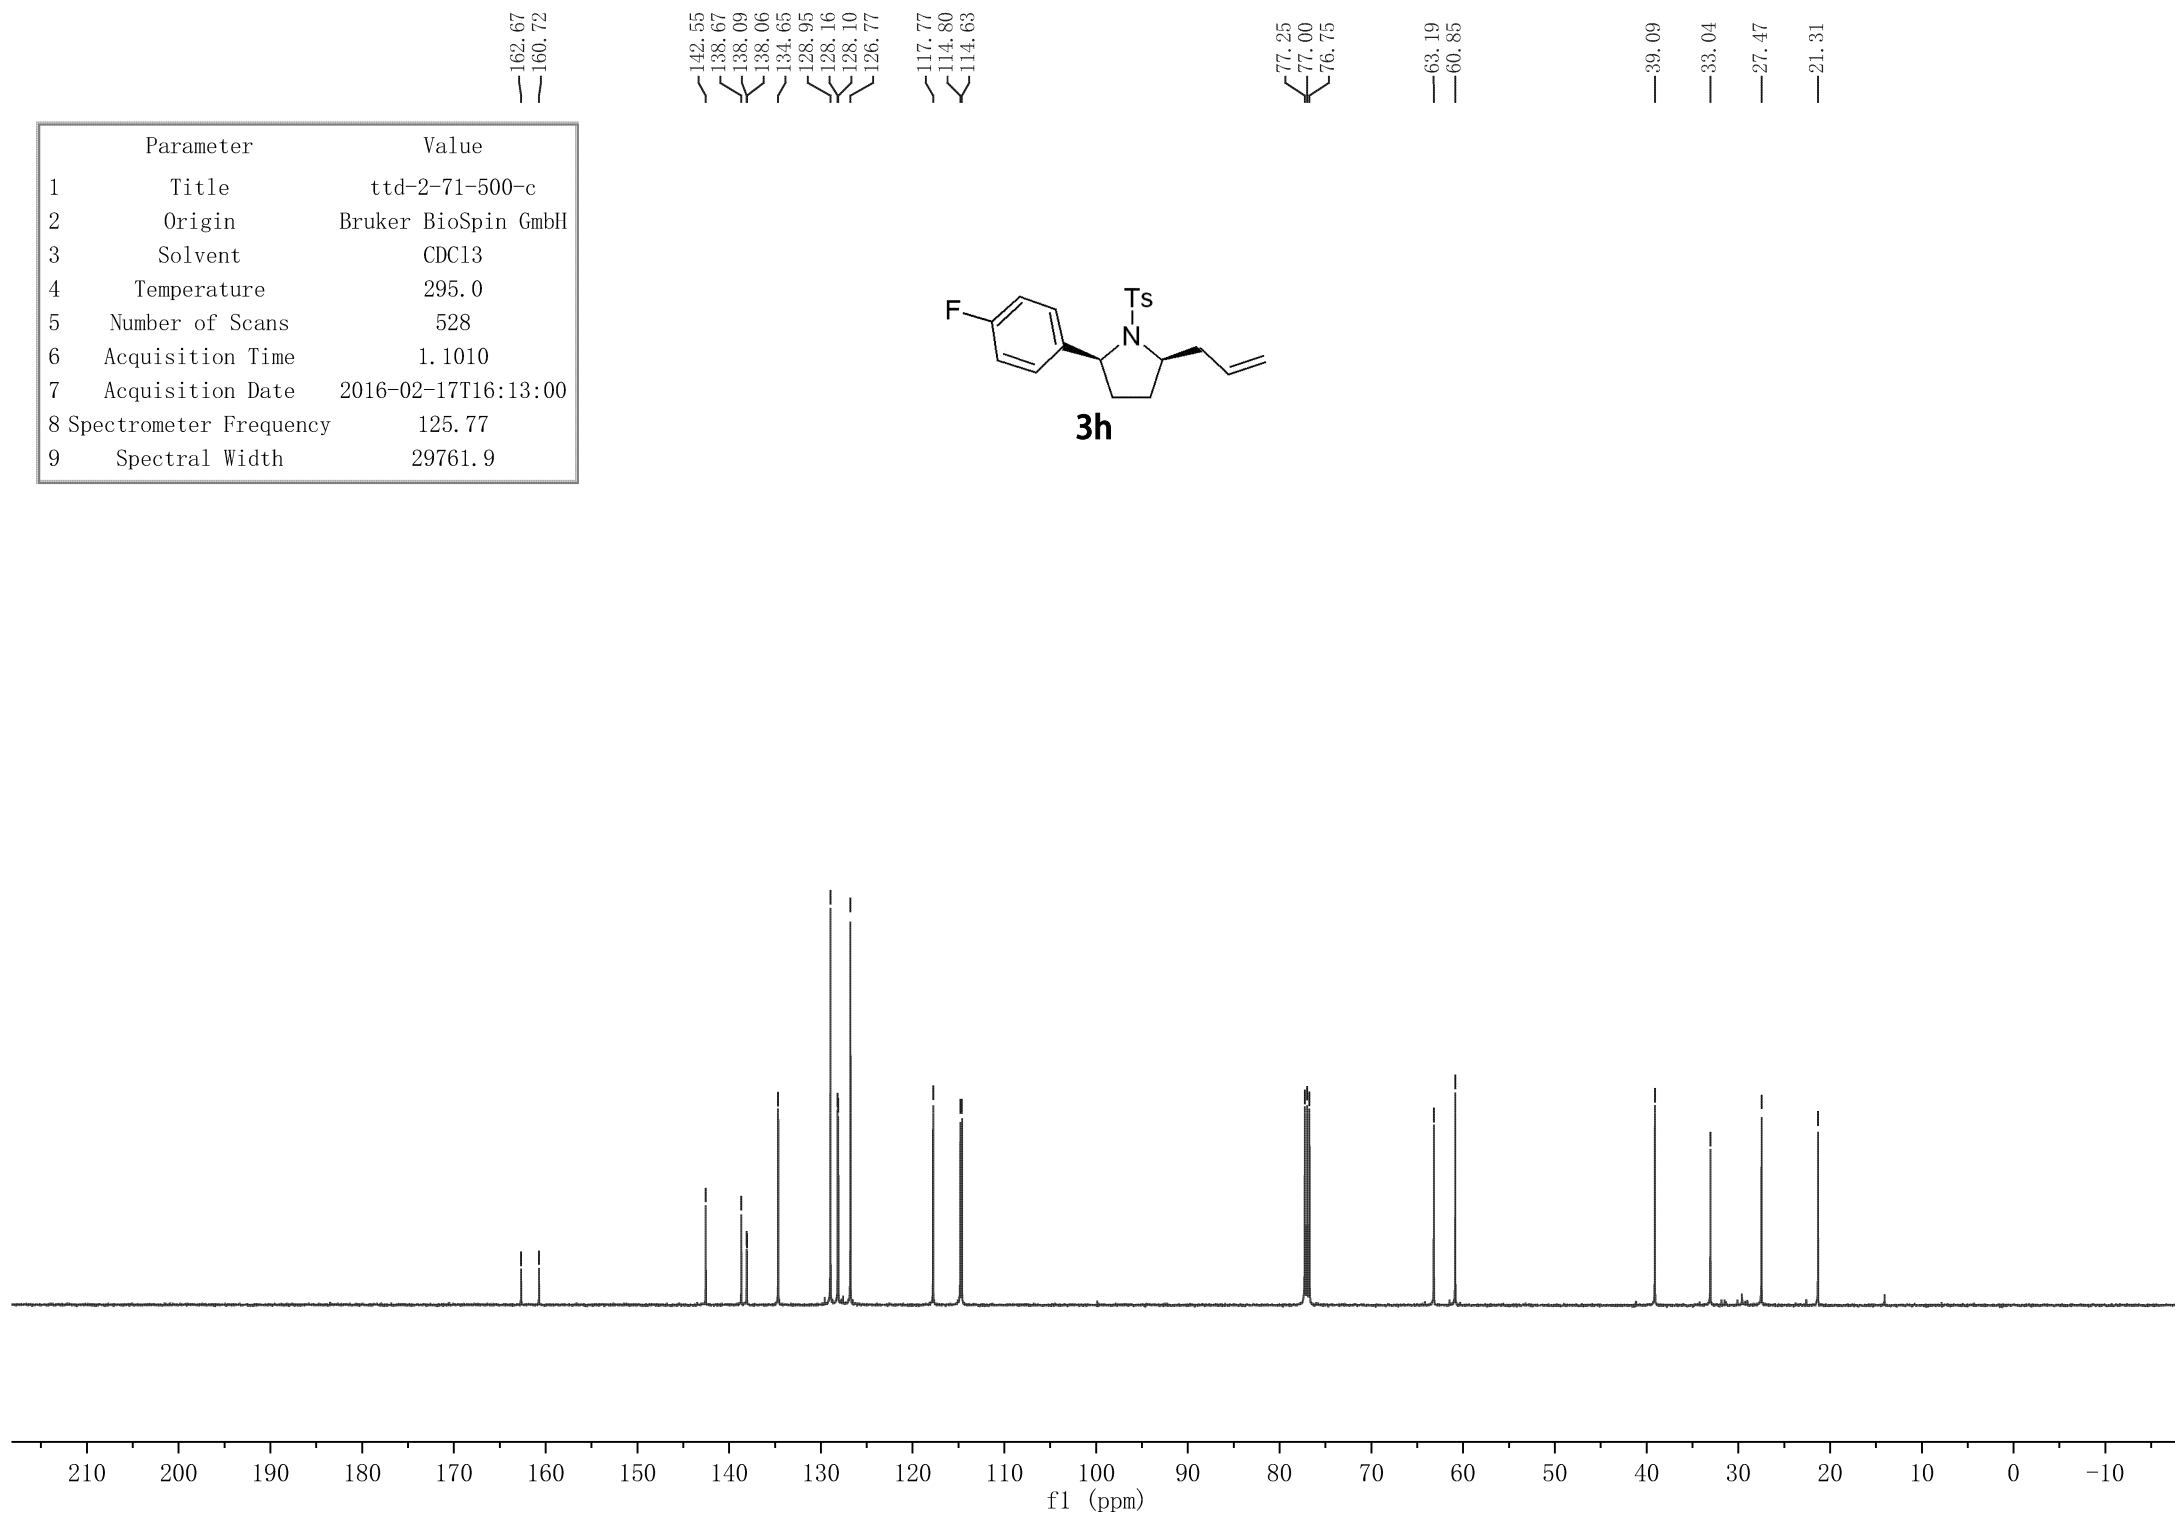

| Parameter                | Value               |
|--------------------------|---------------------|
| 1 Title                  | ttd-2-75-500-h      |
| 2 Origin                 | Bruker BioSpin GmbH |
| 3 Solvent                | CDC13               |
| 4 Temperature            | 295.0               |
| 5 Number of Scans        | 16                  |
| 6 Acquisition Time       | 3.2768              |
| 7 Acquisition Date       | 2016-02-18T21:17:00 |
| 8 Spectrometer Frequency | 500.17              |
| 9 Spectral Width         | 10000.0             |

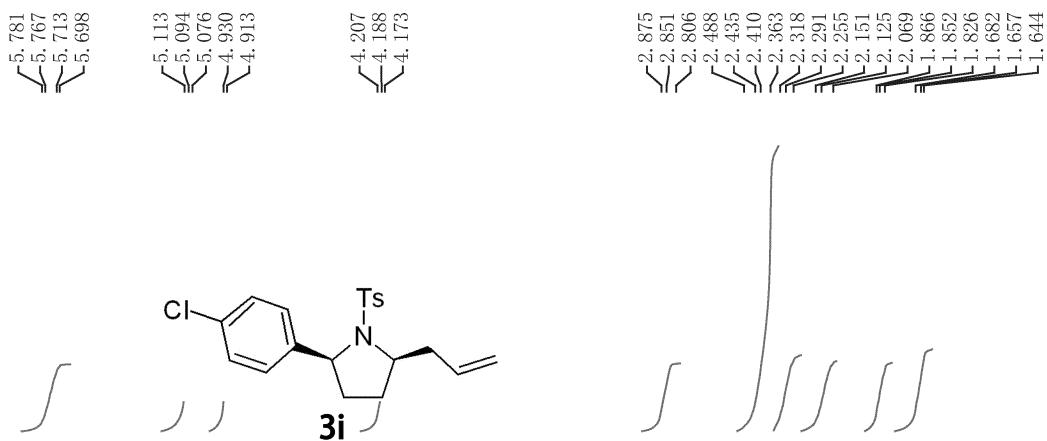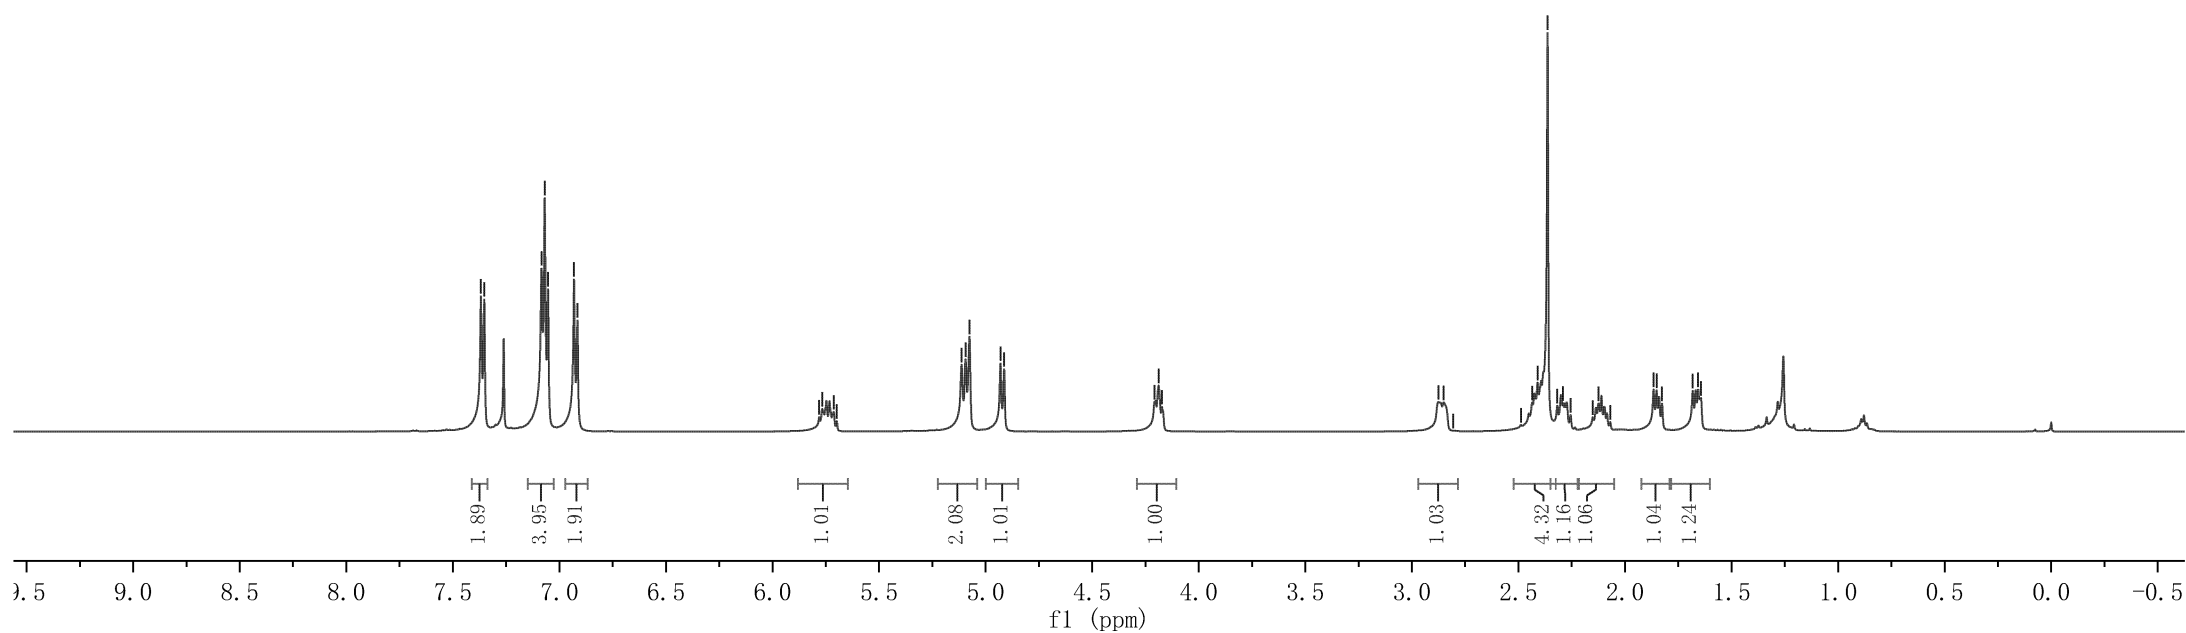

|   | Parameter              | Value               |
|---|------------------------|---------------------|
| 1 | Title                  | ttd-2-75-500-c      |
| 2 | Origin                 | Bruker BioSpin GmbH |
| 3 | Solvent                | CDCl3               |
| 4 | Temperature            | 295.0               |
| 5 | Number of Scans        | 512                 |
| 6 | Acquisition Time       | 1.1010              |
| 7 | Acquisition Date       | 2016-02-18T21:46:00 |
| 8 | Spectrometer Frequency | 125.77              |
| 9 | Spectral Width         | 29761.9             |

142.70  
140.87  
138.61  
134.60  
132.60  
129.01  
128.05  
127.91  
126.80  
— 117.82

77.25  
77.00  
76.75

63.19  
— 60.96

— 39.05

— 32.99

— 27.44

— 21.35

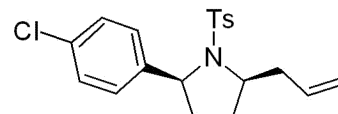

**3i**

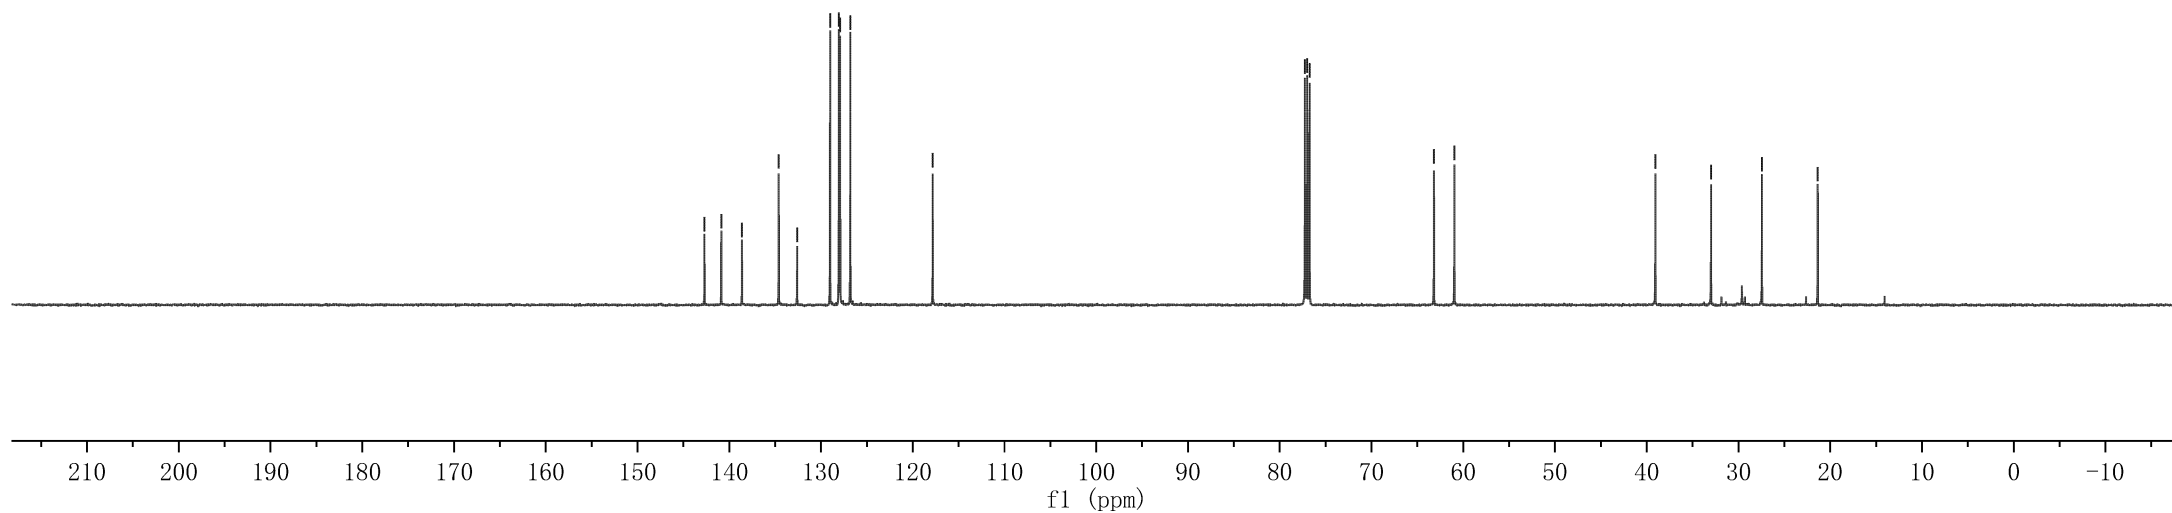

7.363  
7.347  
7.213  
7.197  
7.081  
7.065  
6.870  
6.854

5.778  
5.744  
5.724  
5.695

5.110  
5.092  
5.073  
4.908  
4.890

4.208  
4.203  
4.189  
4.174  
4.169

2.869  
2.860  
2.843  
2.449  
2.407  
2.396  
2.365  
2.317  
2.299  
2.254  
2.146  
2.119  
2.064  
1.862  
1.848  
1.678  
1.664  
1.639

| Parameter                | Value               |
|--------------------------|---------------------|
| 1 Title                  | ttd-2-80-500-h      |
| 2 Origin                 | Bruker BioSpin GmbH |
| 3 Solvent                | CDC13               |
| 4 Temperature            | 295.0               |
| 5 Number of Scans        | 16                  |
| 6 Acquisition Time       | 3.2768              |
| 7 Acquisition Date       | 2016-02-20T16:31:00 |
| 8 Spectrometer Frequency | 500.17              |
| 9 Spectral Width         | 10000.0             |

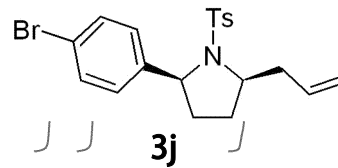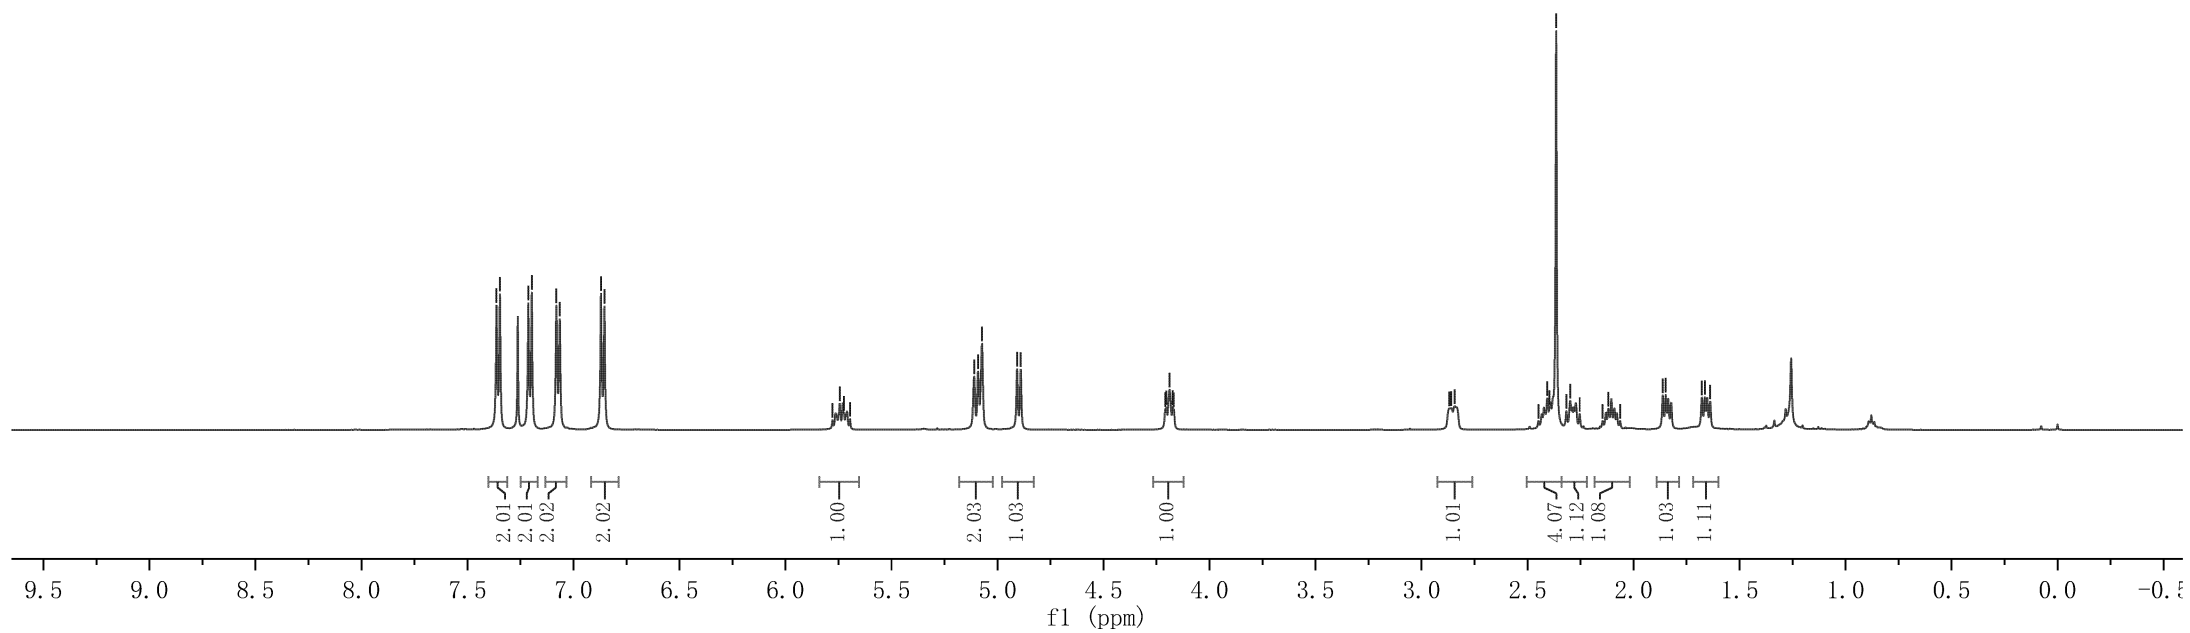

|   | Parameter              | Value               |
|---|------------------------|---------------------|
| 1 | Title                  | ttd-2-80-500-c      |
| 2 | Origin                 | Bruker BioSpin GmbH |
| 3 | Solvent                | CDC13               |
| 4 | Temperature            | 295.0               |
| 5 | Number of Scans        | 512                 |
| 6 | Acquisition Time       | 1.1010              |
| 7 | Acquisition Date       | 2016-02-20T16:59:00 |
| 8 | Spectrometer Frequency | 125.77              |
| 9 | Spectral Width         | 29761.9             |

142.69  
141.33  
138.56  
134.55  
130.96  
128.99  
128.25  
126.75  
120.65  
117.80

77.25  
77.00  
76.75

63.17  
60.97

39.03

32.90

27.41

21.35

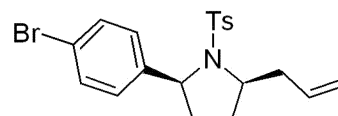

**3j**

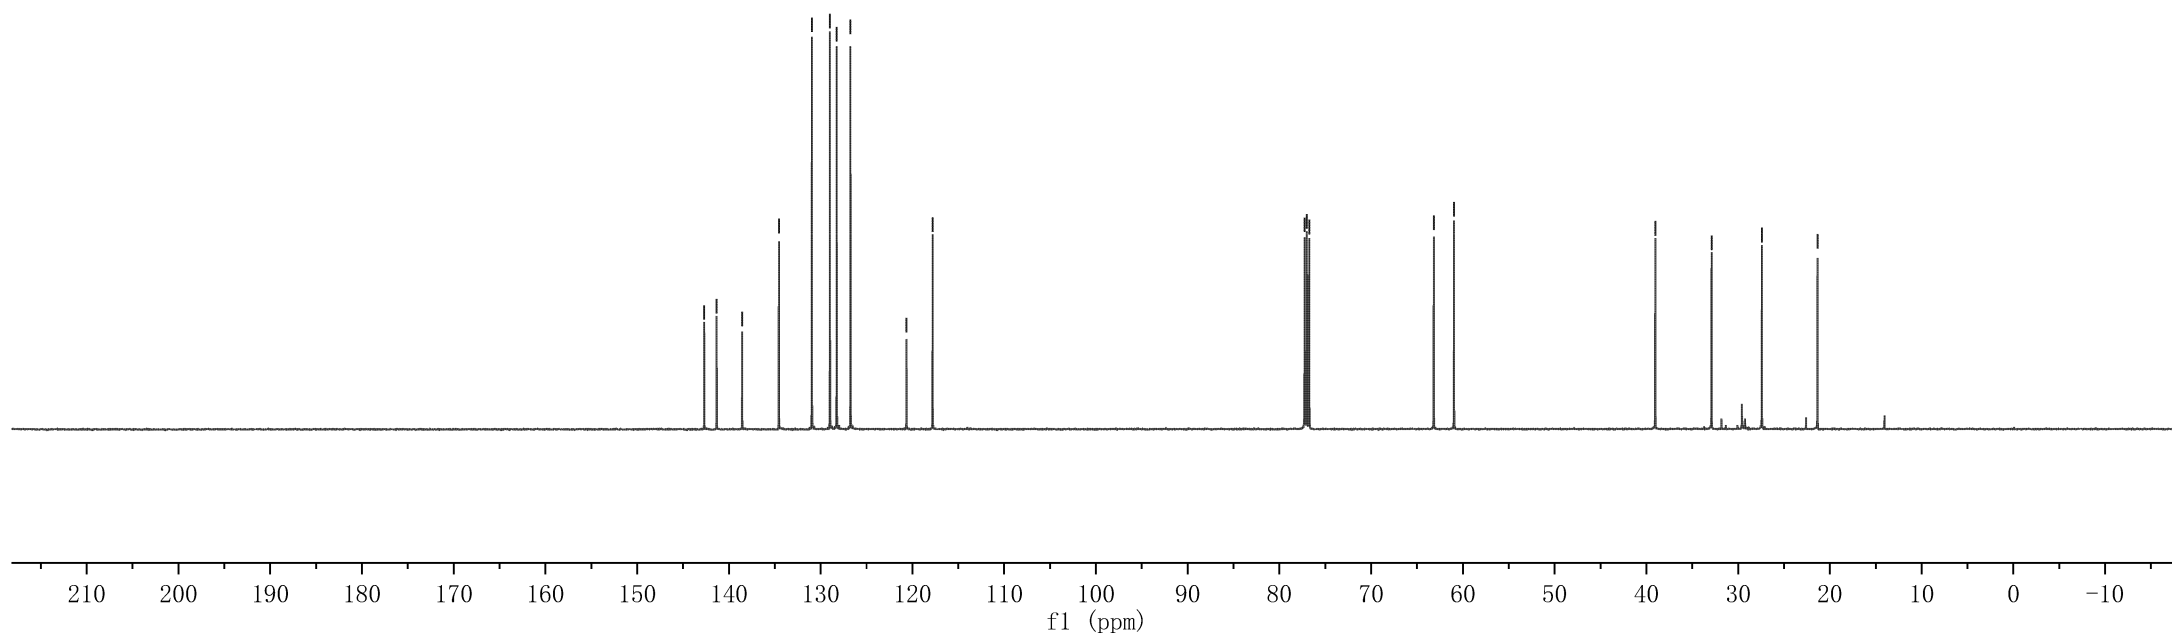

|   | Parameter              | Value               |
|---|------------------------|---------------------|
| 1 | Title                  | ttd-2-95-2328-500-h |
| 2 | Origin                 | Bruker BioSpin GmbH |
| 3 | Solvent                | CDC13               |
| 4 | Temperature            | 295.0               |
| 5 | Number of Scans        | 16                  |
| 6 | Acquisition Time       | 3.2768              |
| 7 | Acquisition Date       | 2016-02-29T17:30:00 |
| 8 | Spectrometer Frequency | 500.17              |
| 9 | Spectral Width         | 10000.0             |

7.647  
7.630  
7.485  
7.469  
7.206  
7.190  
7.177  
7.161  
7.141  
7.112  
7.059  
7.055  
7.029  
7.025

5.682  
5.661  
5.614  
5.599  
5.316  
5.299  
5.064  
5.045  
5.027

4.351  
4.330  
4.310

2.848  
2.846  
2.819  
2.428  
2.382  
2.320  
2.155  
2.128  
2.110  
2.092  
2.044  
1.979  
1.952  
1.786  
1.773  
1.747  
1.715  
1.690  
1.677

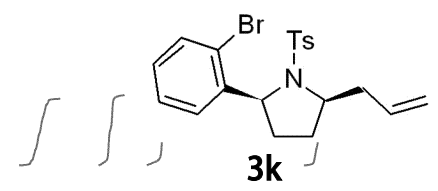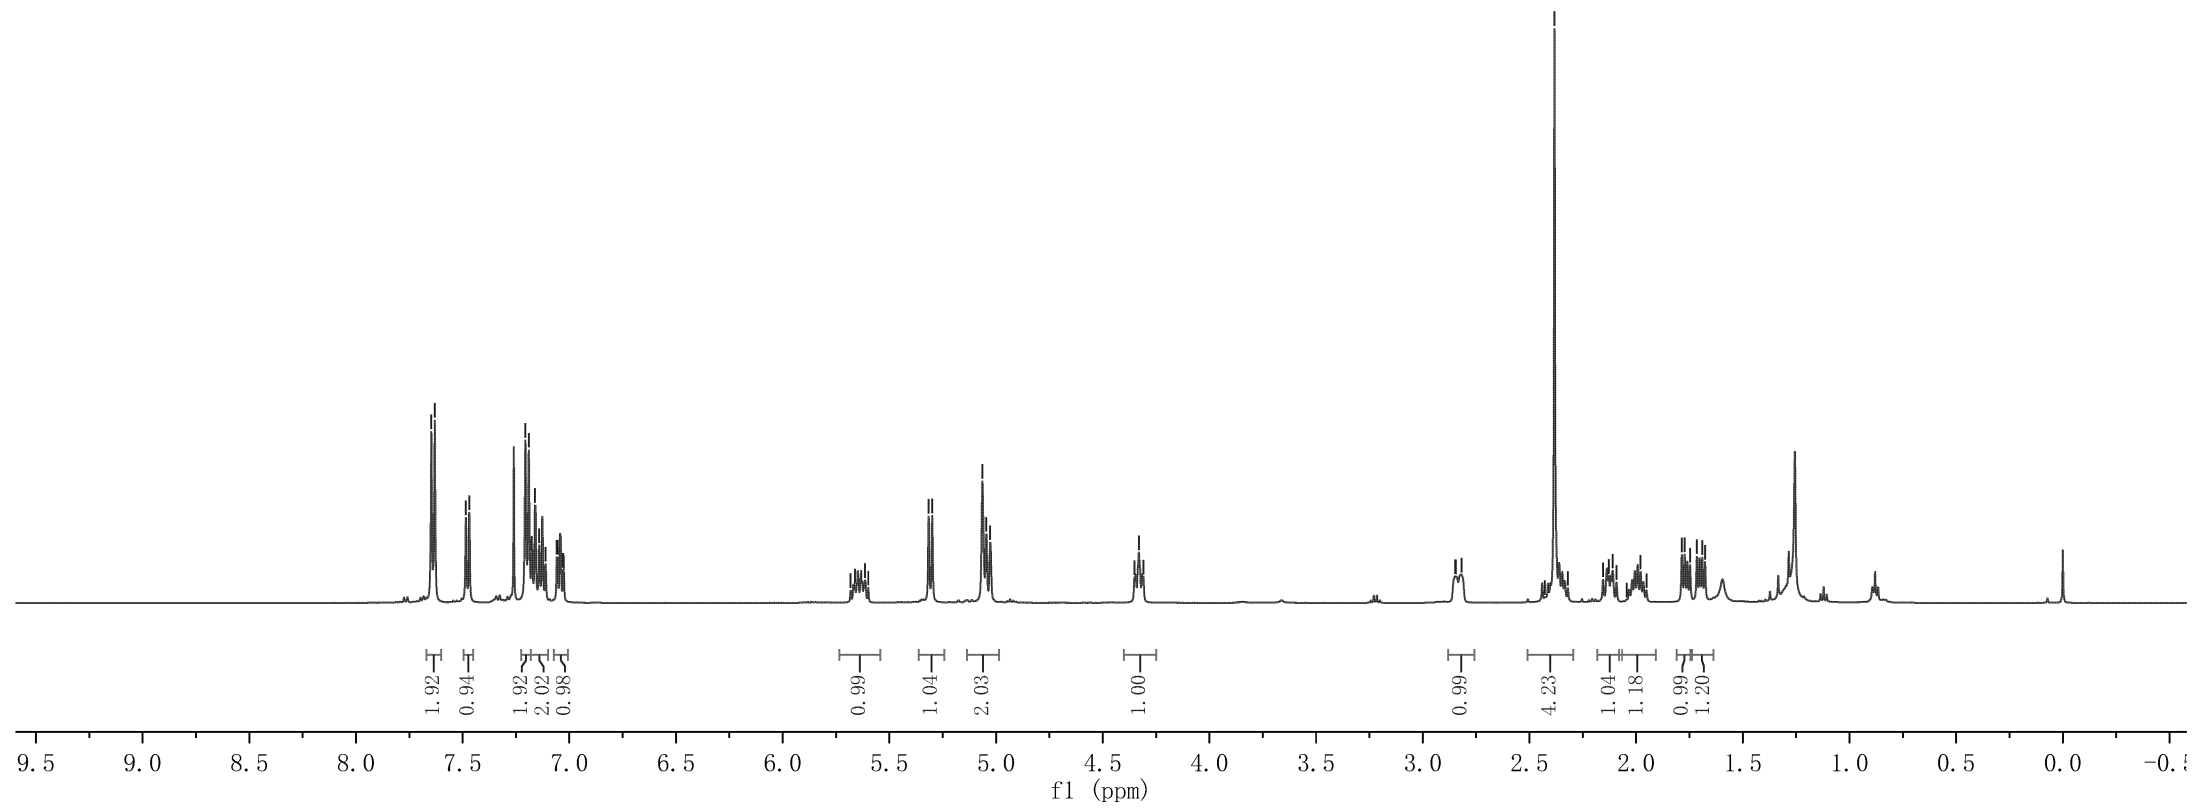

|   | Parameter              | Value               |
|---|------------------------|---------------------|
| 1 | Title                  | ttd-2-95-2328-500-c |
| 2 | Origin                 | Bruker BioSpin GmbH |
| 3 | Solvent                | CDC13               |
| 4 | Temperature            | 295.0               |
| 5 | Number of Scans        | 325                 |
| 6 | Acquisition Time       | 1.1010              |
| 7 | Acquisition Date       | 2016-02-29T17:48:00 |
| 8 | Spectrometer Frequency | 125.77              |
| 9 | Spectral Width         | 29761.9             |

142.95  
141.62  
138.63  
134.53  
132.61  
129.36  
128.23  
128.02  
127.11  
126.85  
121.45  
117.89

77.25  
77.00  
76.75

63.19  
61.36

37.93

31.82

26.10

21.44

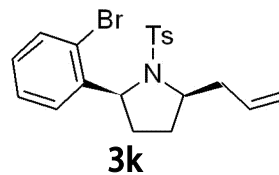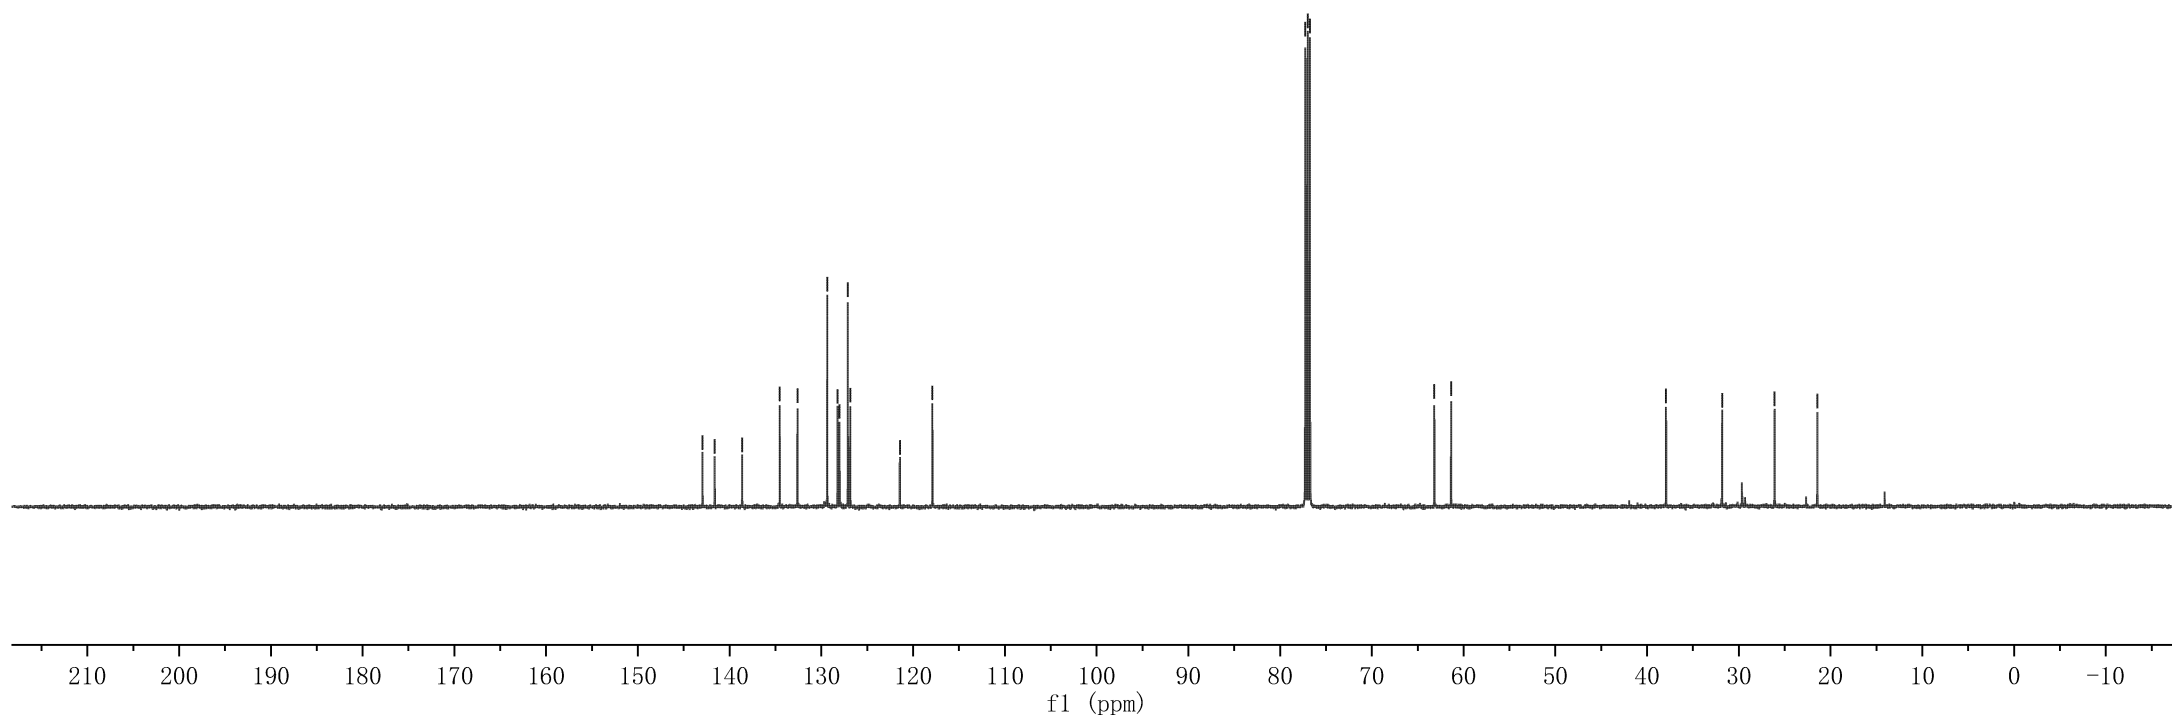

|   | Parameter              | Value               |
|---|------------------------|---------------------|
| 1 | Title                  | ttd-2-74-500-h      |
| 2 | Origin                 | Bruker BioSpin GmbH |
| 3 | Solvent                | CDCl3               |
| 4 | Temperature            | 294.9               |
| 5 | Number of Scans        | 16                  |
| 6 | Acquisition Time       | 3.2768              |
| 7 | Acquisition Date       | 2016-02-18T14:07:00 |
| 8 | Spectrometer Frequency | 500.17              |
| 9 | Spectral Width         | 10000.0             |

7.982  
7.966  
7.833  
7.817  
7.670  
7.654  
7.541  
7.525  
7.502  
7.459  
7.445  
7.243  
7.220  
7.182  
7.168  
7.095  
7.079

5.829  
5.813  
5.763  
5.714  
5.695  
5.681

5.104  
5.090  
5.070

4.357  
4.342  
4.327

2.990  
2.949  
2.931  
2.525  
2.510  
2.423  
2.338  
2.299  
2.263  
2.237  
2.109  
2.094  
2.028  
1.830  
1.805  
1.758

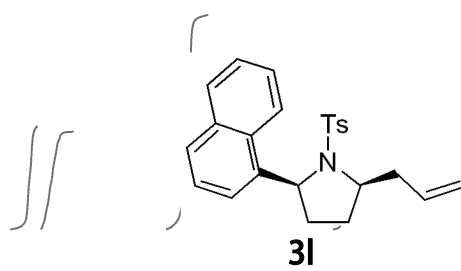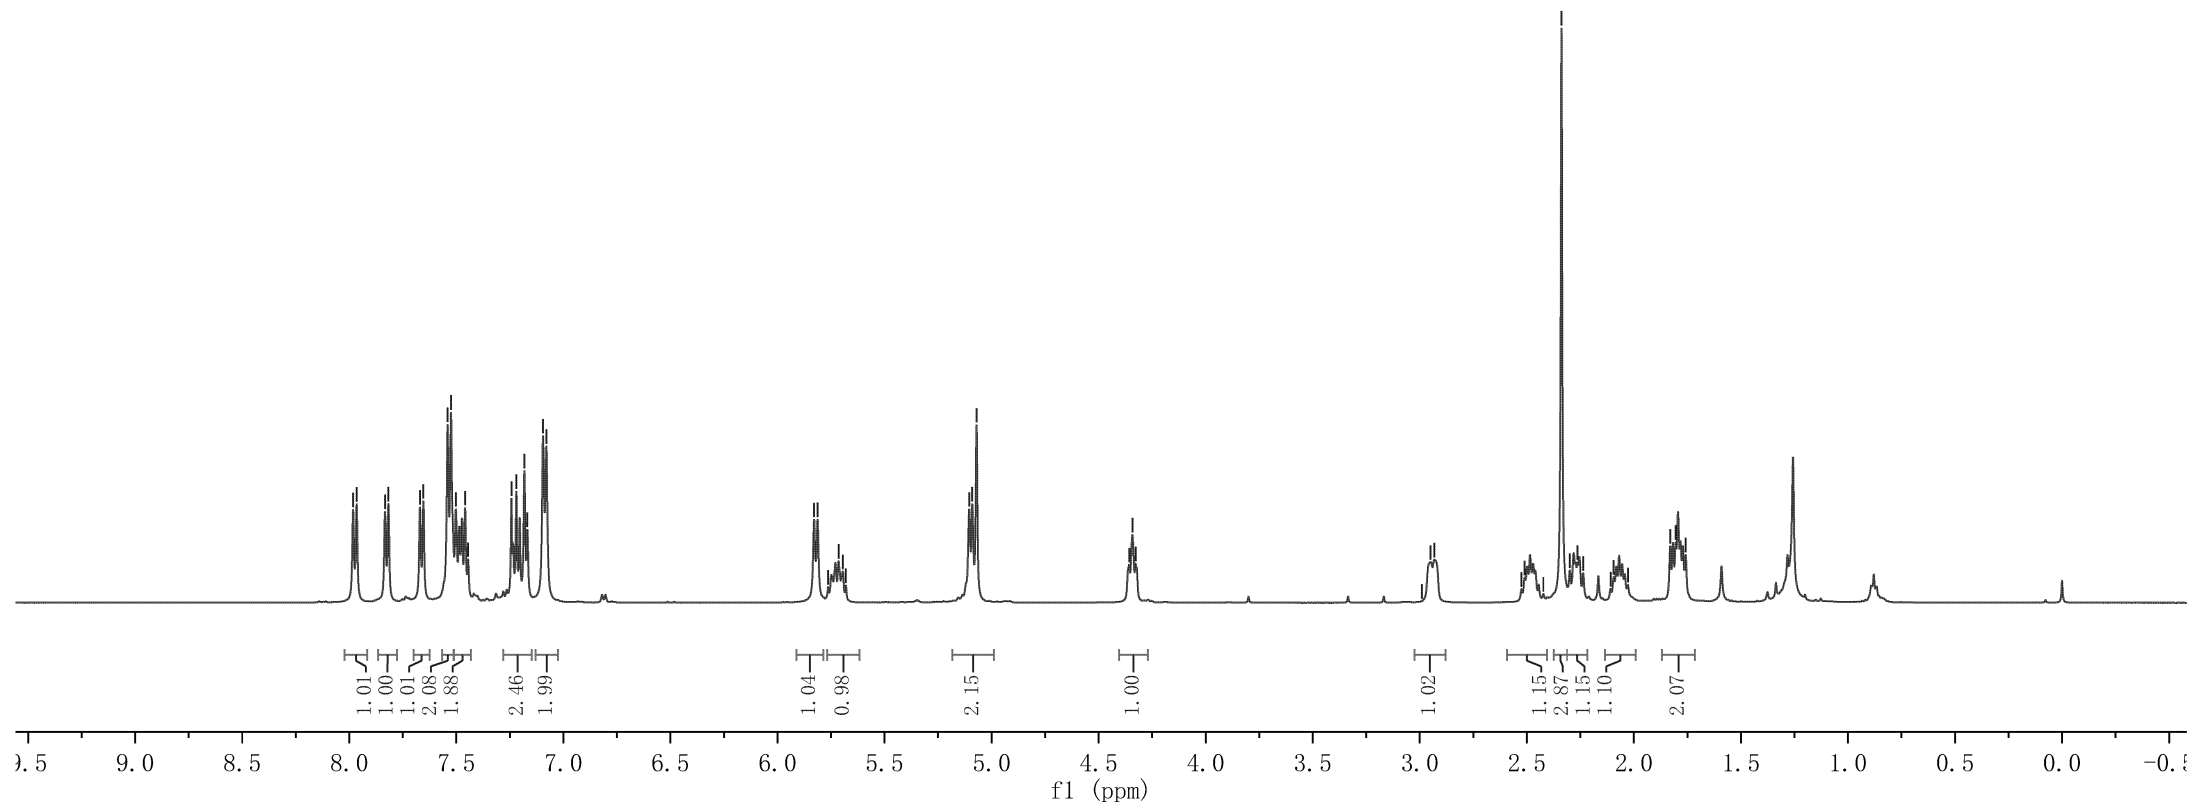

|   | Parameter              | Value               |
|---|------------------------|---------------------|
| 1 | Title                  | ttd-2-74-500-c      |
| 2 | Origin                 | Bruker BioSpin GmbH |
| 3 | Solvent                | CDC13               |
| 4 | Temperature            | 295.0               |
| 5 | Number of Scans        | 512                 |
| 6 | Acquisition Time       | 1.1010              |
| 7 | Acquisition Date       | 2016-02-18T14:35:00 |
| 8 | Spectrometer Frequency | 125.77              |
| 9 | Spectral Width         | 29761.9             |

142.69  
138.82  
137.30  
134.76  
133.71  
129.84  
129.11  
128.86  
127.30  
127.05  
125.96  
125.30  
124.77  
124.00  
122.62  
117.78

77.25  
77.00  
76.75

60.95  
60.93

38.38

32.01

27.14

21.37

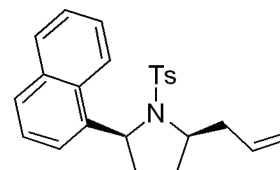

**3l**

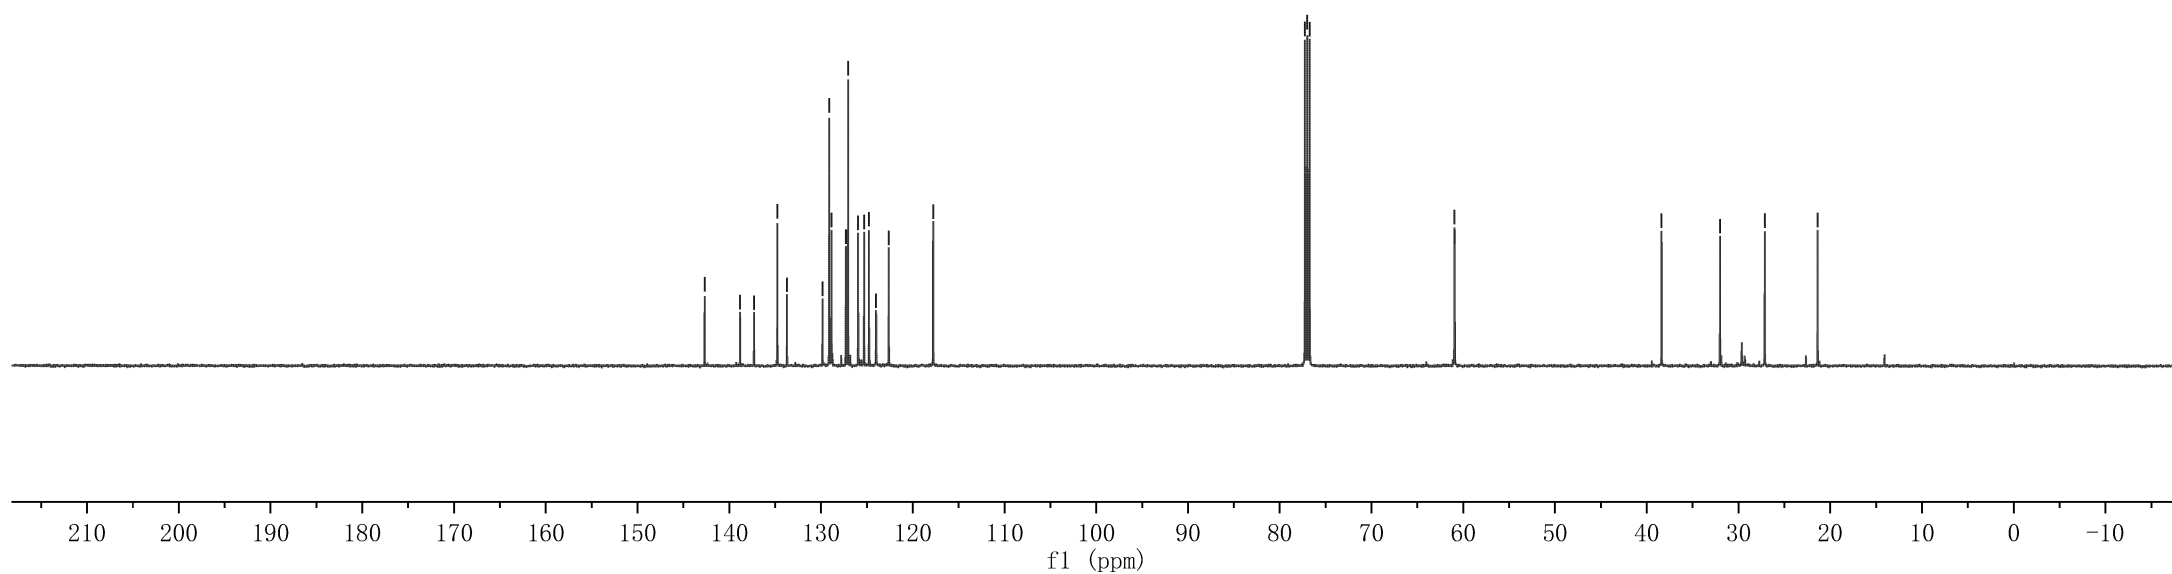

| Parameter                | Value               |
|--------------------------|---------------------|
| 1 Title                  | LTY-1-38-P1         |
| 2 Origin                 | Bruker BioSpin GmbH |
| 3 Solvent                | CDC13               |
| 4 Temperature            | 297.6               |
| 5 Number of Scans        | 8                   |
| 6 Acquisition Time       | 3.1719              |
| 7 Acquisition Date       | 2019-03-02T04:18:09 |
| 8 Spectrometer Frequency | 500.17              |
| 9 Spectral Width         | 10330.6             |

8.447  
8.431  
7.742  
7.726  
7.464  
7.449  
7.412  
7.348  
7.334  
7.319  
7.304  
7.288  
7.258  
7.243  
7.229

5.001  
4.991  
4.987  
4.977

3.759  
3.747  
3.742  
3.731

2.611  
2.423  
2.129  
1.987  
1.952  
1.891  
1.750  
1.724  
1.685  
1.594  
1.569  
1.528  
1.423  
1.378  
0.907  
0.894  
0.879

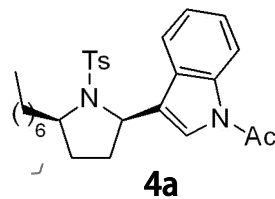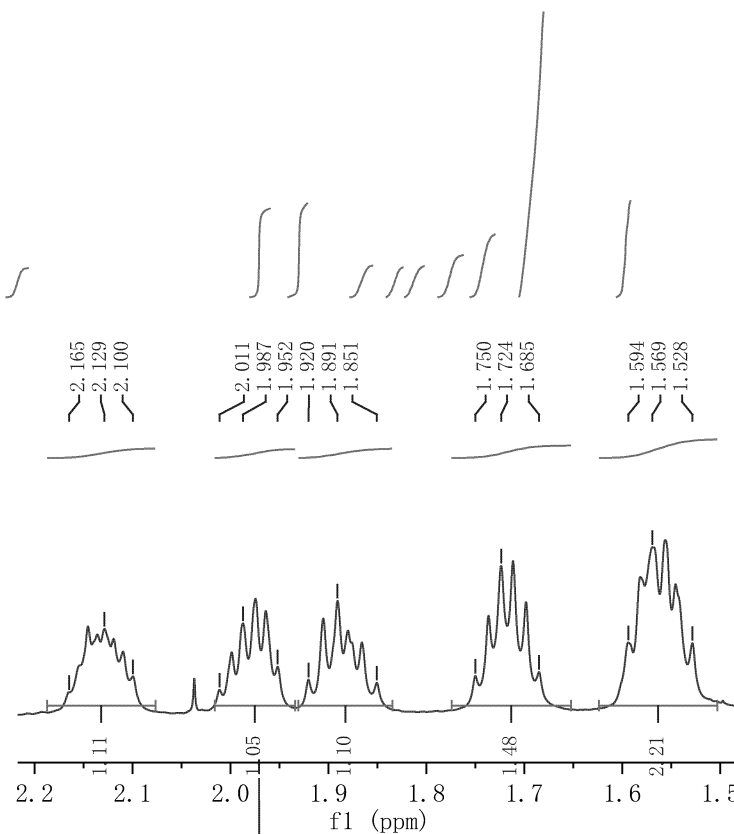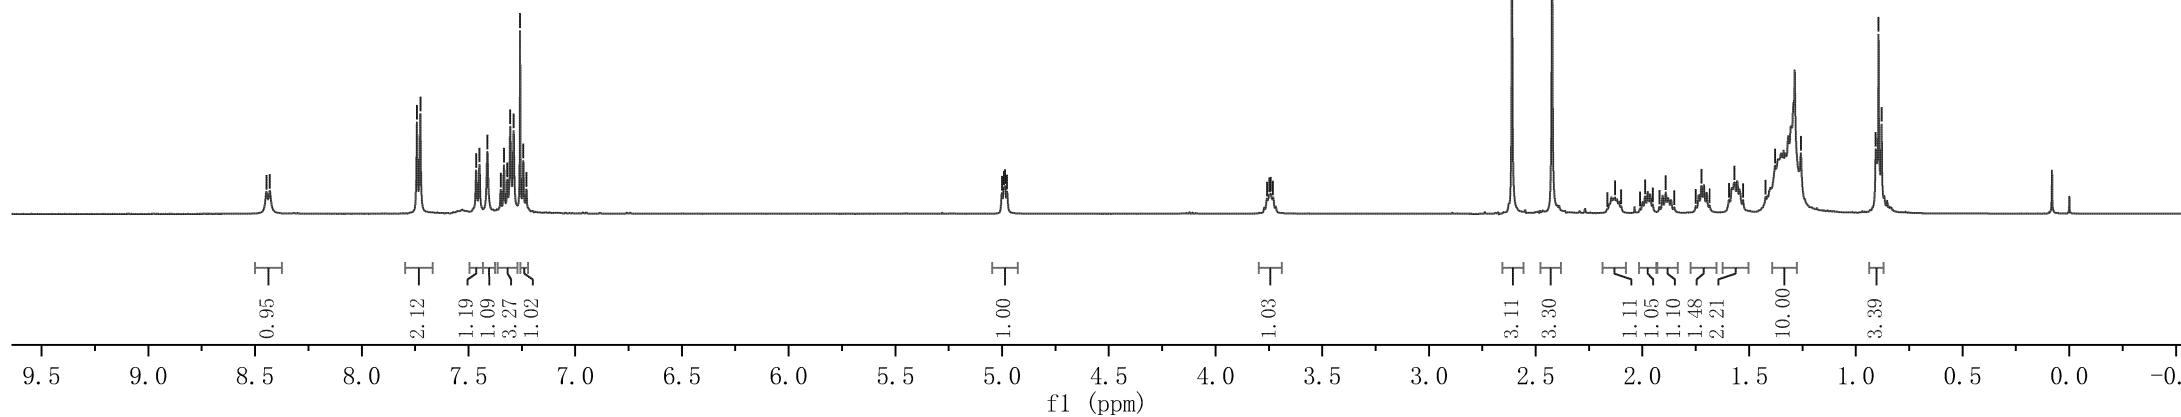

|   | Parameter              | Value               |
|---|------------------------|---------------------|
| 1 | Title                  | LTY-1-38-P1-C       |
| 2 | Origin                 | Bruker BioSpin GmbH |
| 3 | Solvent                | CDCl3               |
| 4 | Temperature            | 298.2               |
| 5 | Number of Scans        | 28                  |
| 6 | Acquisition Time       | 1.1010              |
| 7 | Acquisition Date       | 2019-03-02T04:20:55 |
| 8 | Spectrometer Frequency | 125.77              |
| 9 | Spectral Width         | 29761.9             |

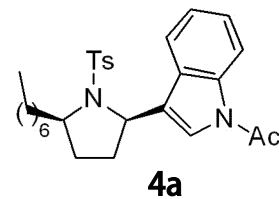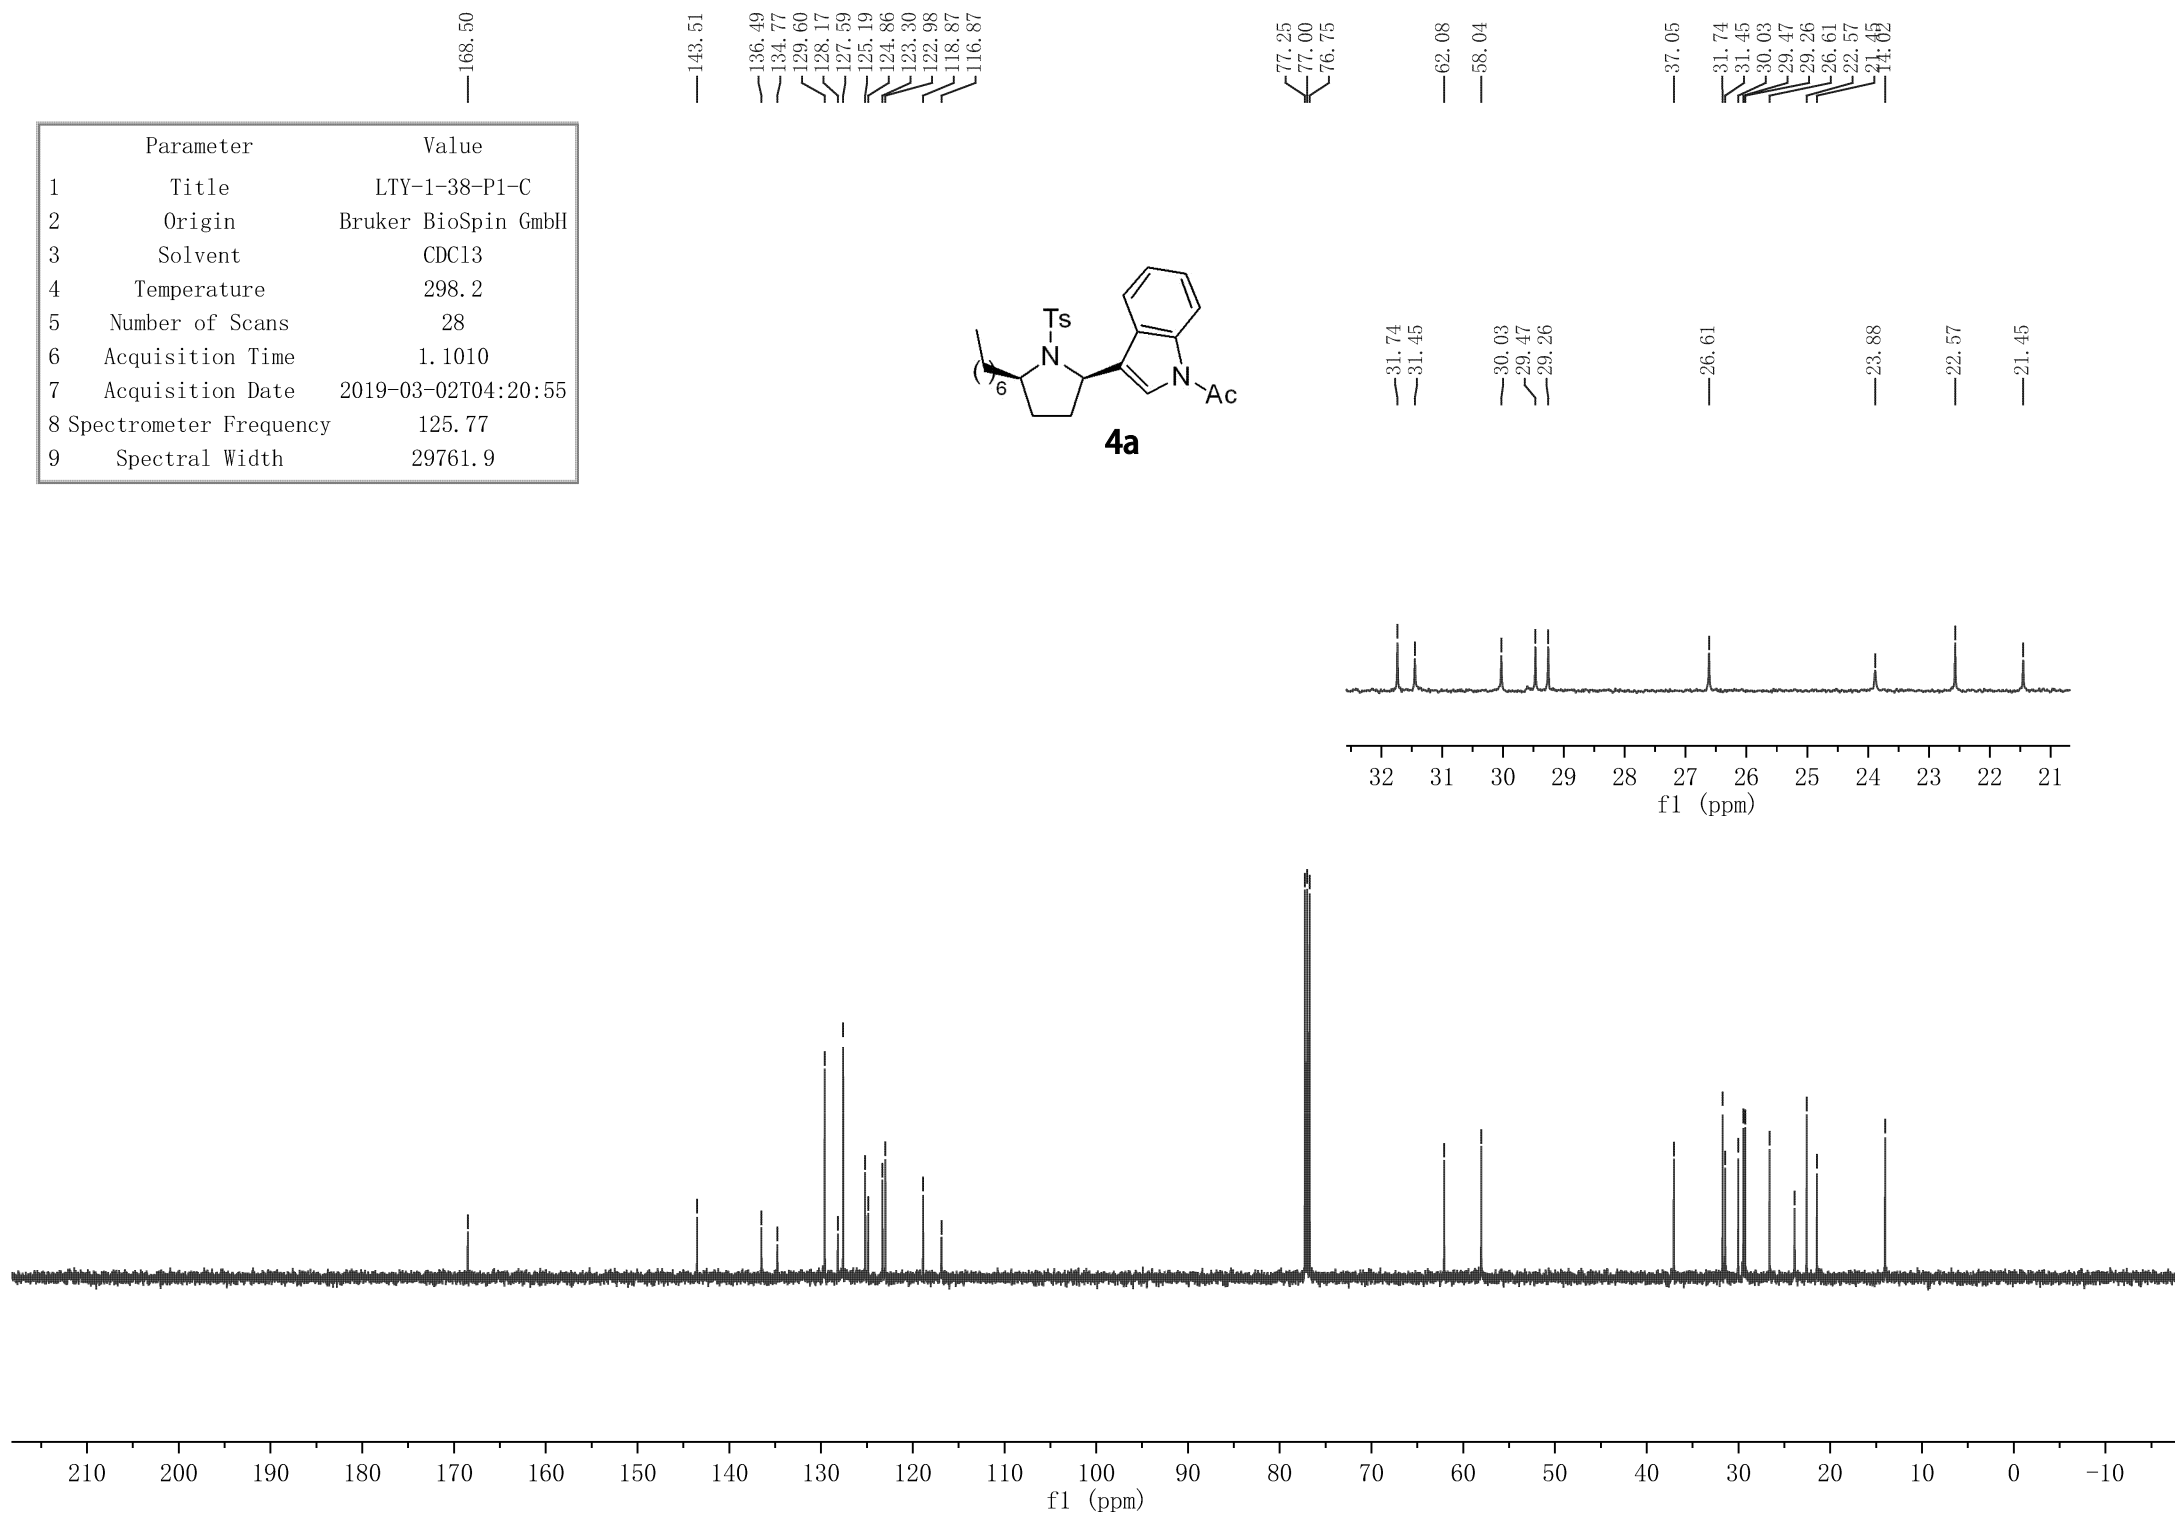

| Parameter                | Value               |
|--------------------------|---------------------|
| 1 Title                  | LTY-1-65a2          |
| 2 Origin                 | Bruker BioSpin GmbH |
| 3 Solvent                | CDC13               |
| 4 Temperature            | 295.4               |
| 5 Number of Scans        | 8                   |
| 6 Acquisition Time       | 3.9846              |
| 7 Acquisition Date       | 2019-03-18T13:36:13 |
| 8 Spectrometer Frequency | 400.13              |
| 9 Spectral Width         | 8223.7              |

8.309  
8.288  
7.747  
7.727  
7.359  
7.316  
7.296  
7.211  
7.166  
7.144  
7.142

4.979  
4.967  
4.962  
4.950

3.776  
3.760  
3.748  
3.738  
3.725  
3.709

2.592  
2.432  
2.147  
1.969  
1.941  
1.924  
1.887  
1.842  
1.735  
1.686  
1.591  
1.552  
1.518  
1.372  
1.318  
0.916  
0.894  
0.876

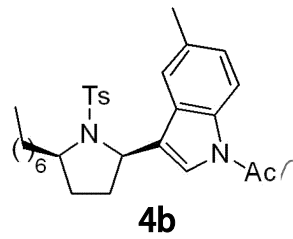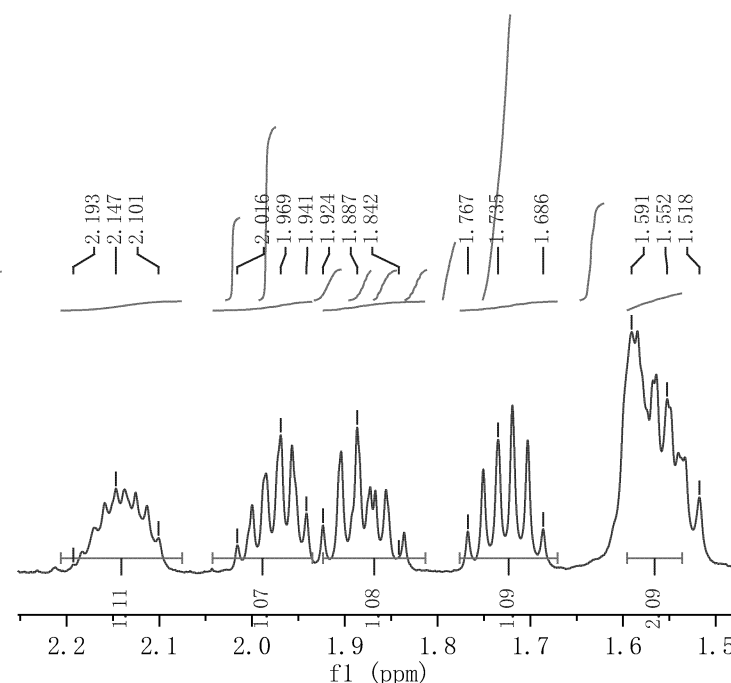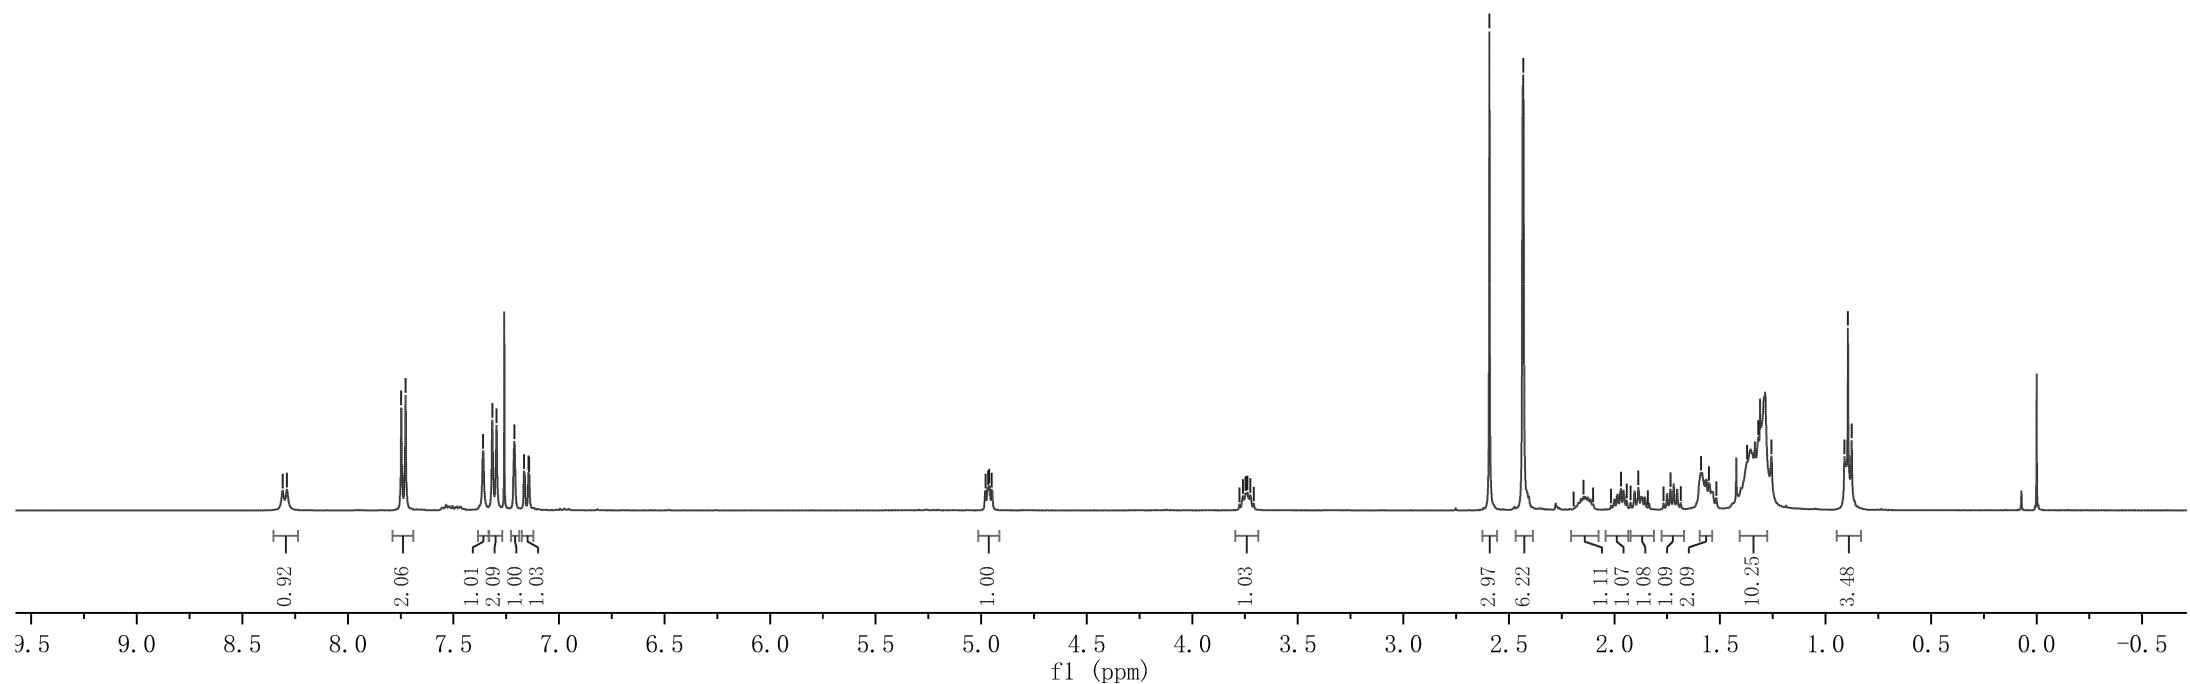

|   | Parameter              | Value               |
|---|------------------------|---------------------|
| 1 | Title                  | LTY-1-65a-C         |
| 2 | Origin                 | Bruker BioSpin GmbH |
| 3 | Solvent                | CDC13               |
| 4 | Temperature            | 298.0               |
| 5 | Number of Scans        | 58                  |
| 6 | Acquisition Time       | 1.1010              |
| 7 | Acquisition Date       | 2019-03-17T04:32:11 |
| 8 | Spectrometer Frequency | 125.77              |
| 9 | Spectral Width         | 29761.9             |

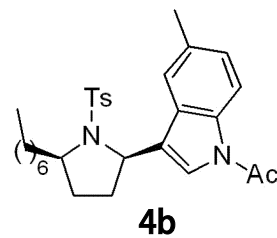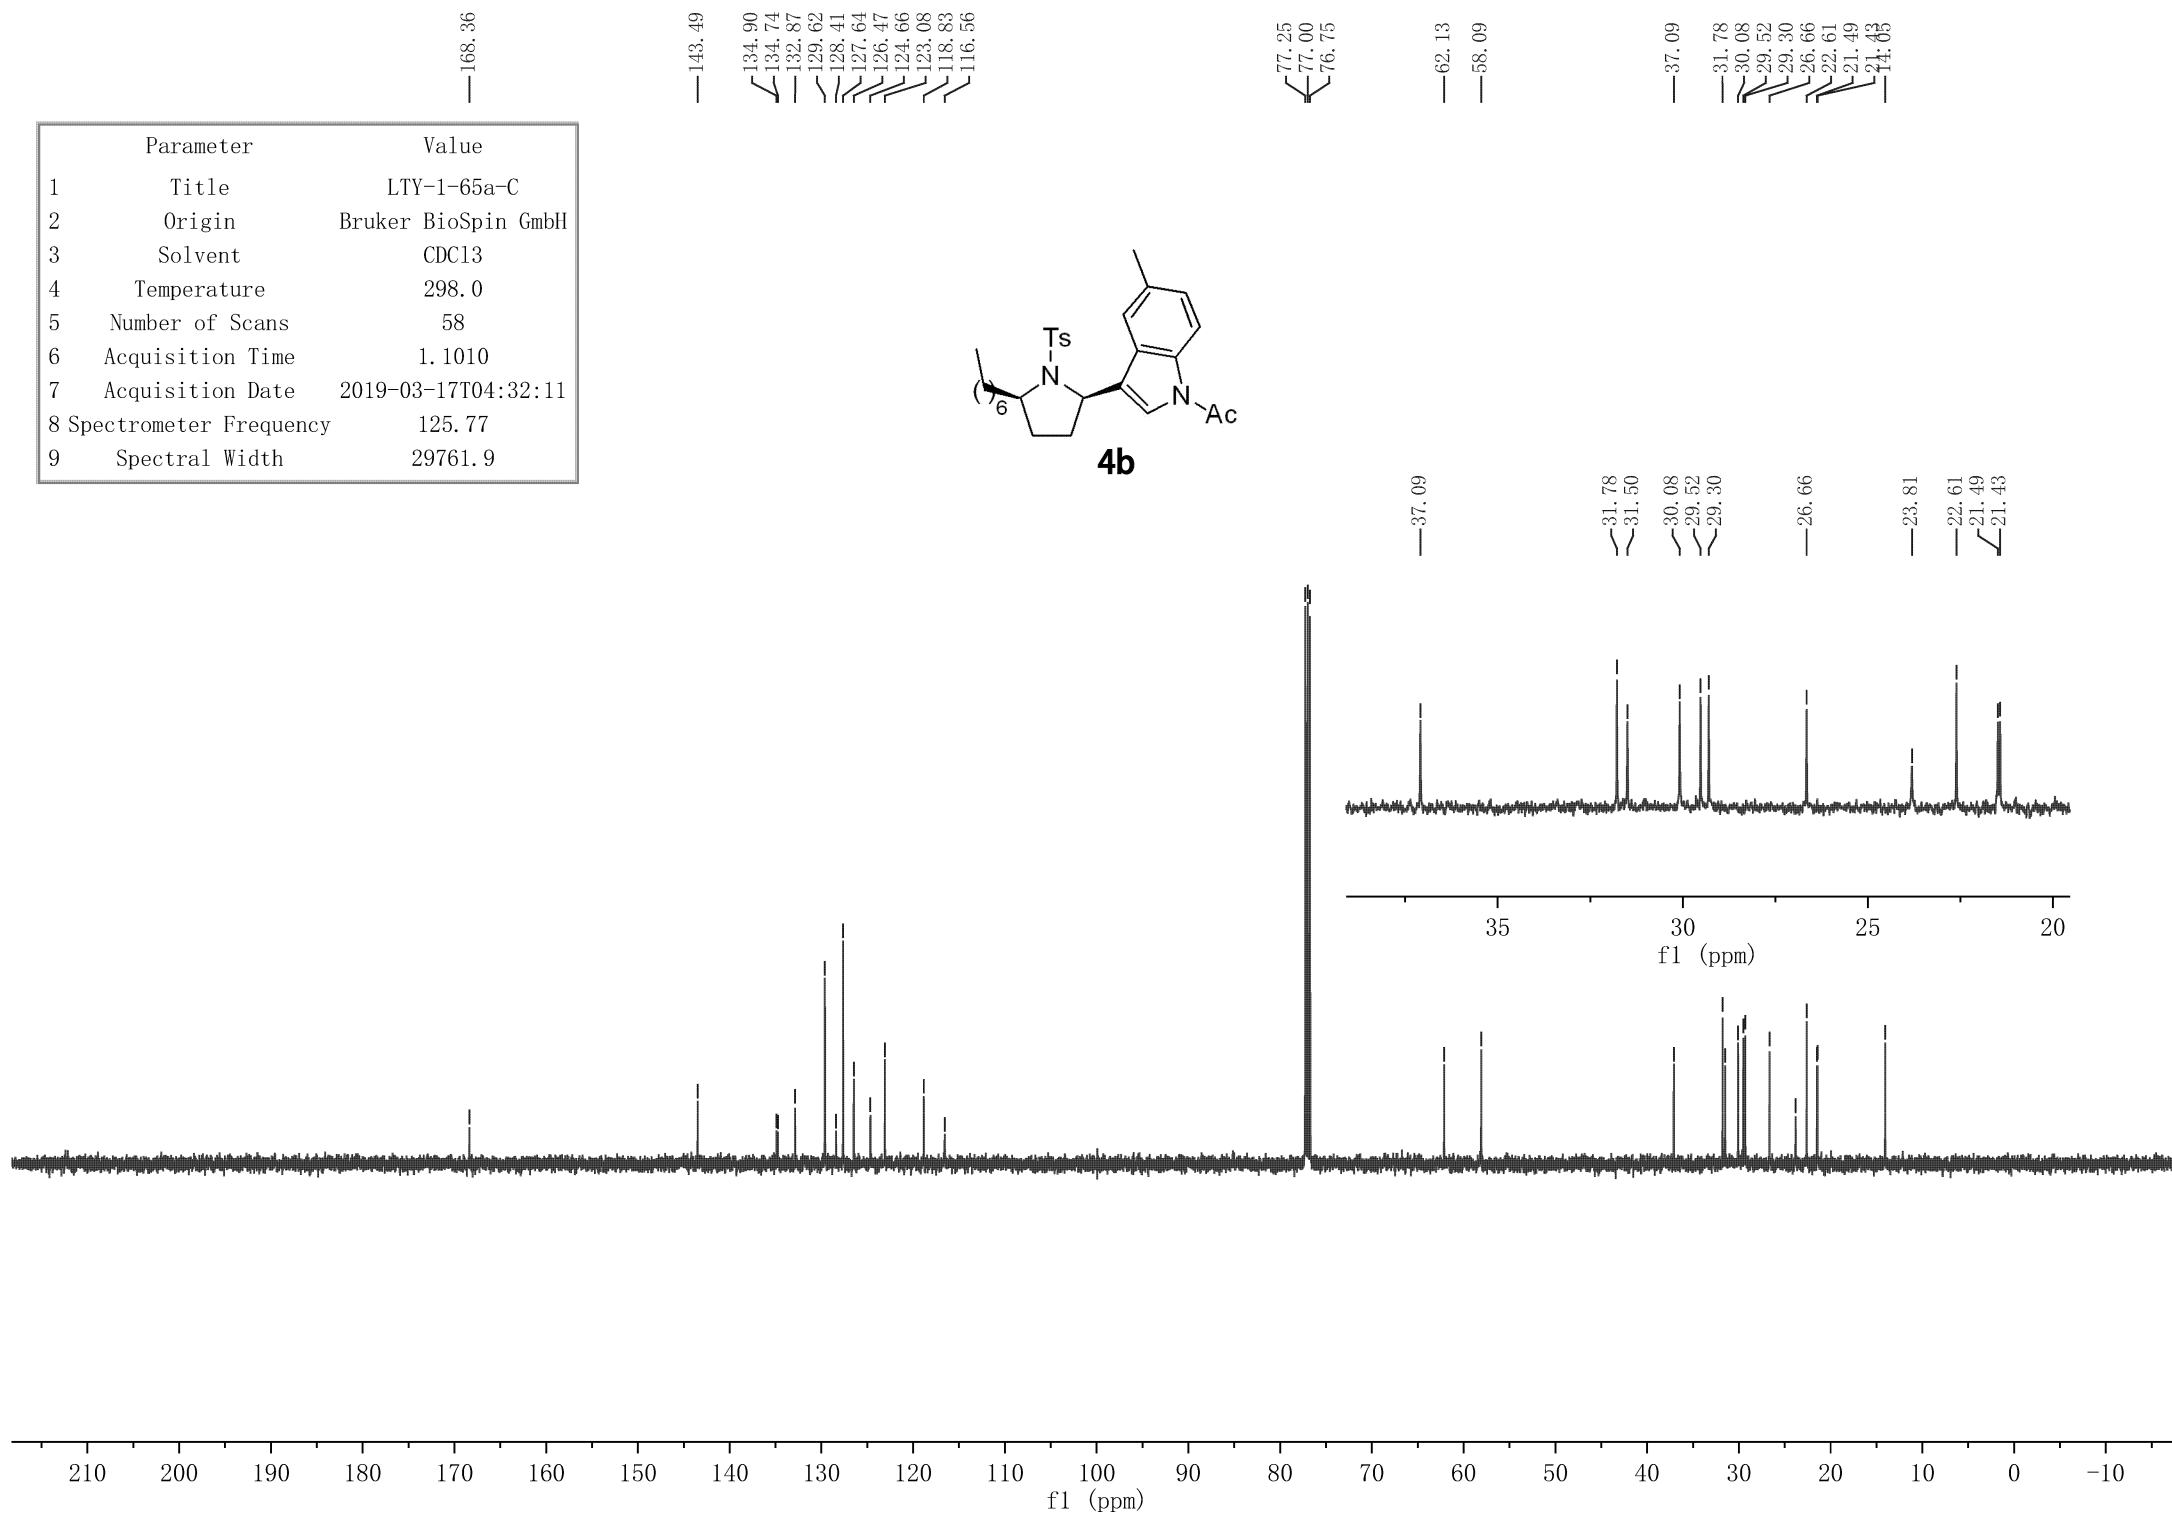

|   | Parameter              | Value               |
|---|------------------------|---------------------|
| 1 | Title                  | LTY-1-78            |
| 2 | Origin                 | Bruker BioSpin GmbH |
| 3 | Solvent                | CDC13               |
| 4 | Temperature            | 297.3               |
| 5 | Number of Scans        | 7                   |
| 6 | Acquisition Time       | 3.1719              |
| 7 | Acquisition Date       | 2019-03-26T00:43:05 |
| 8 | Spectrometer Frequency | 500.17              |
| 9 | Spectral Width         | 10330.6             |

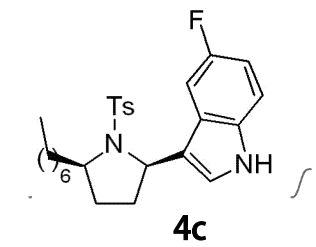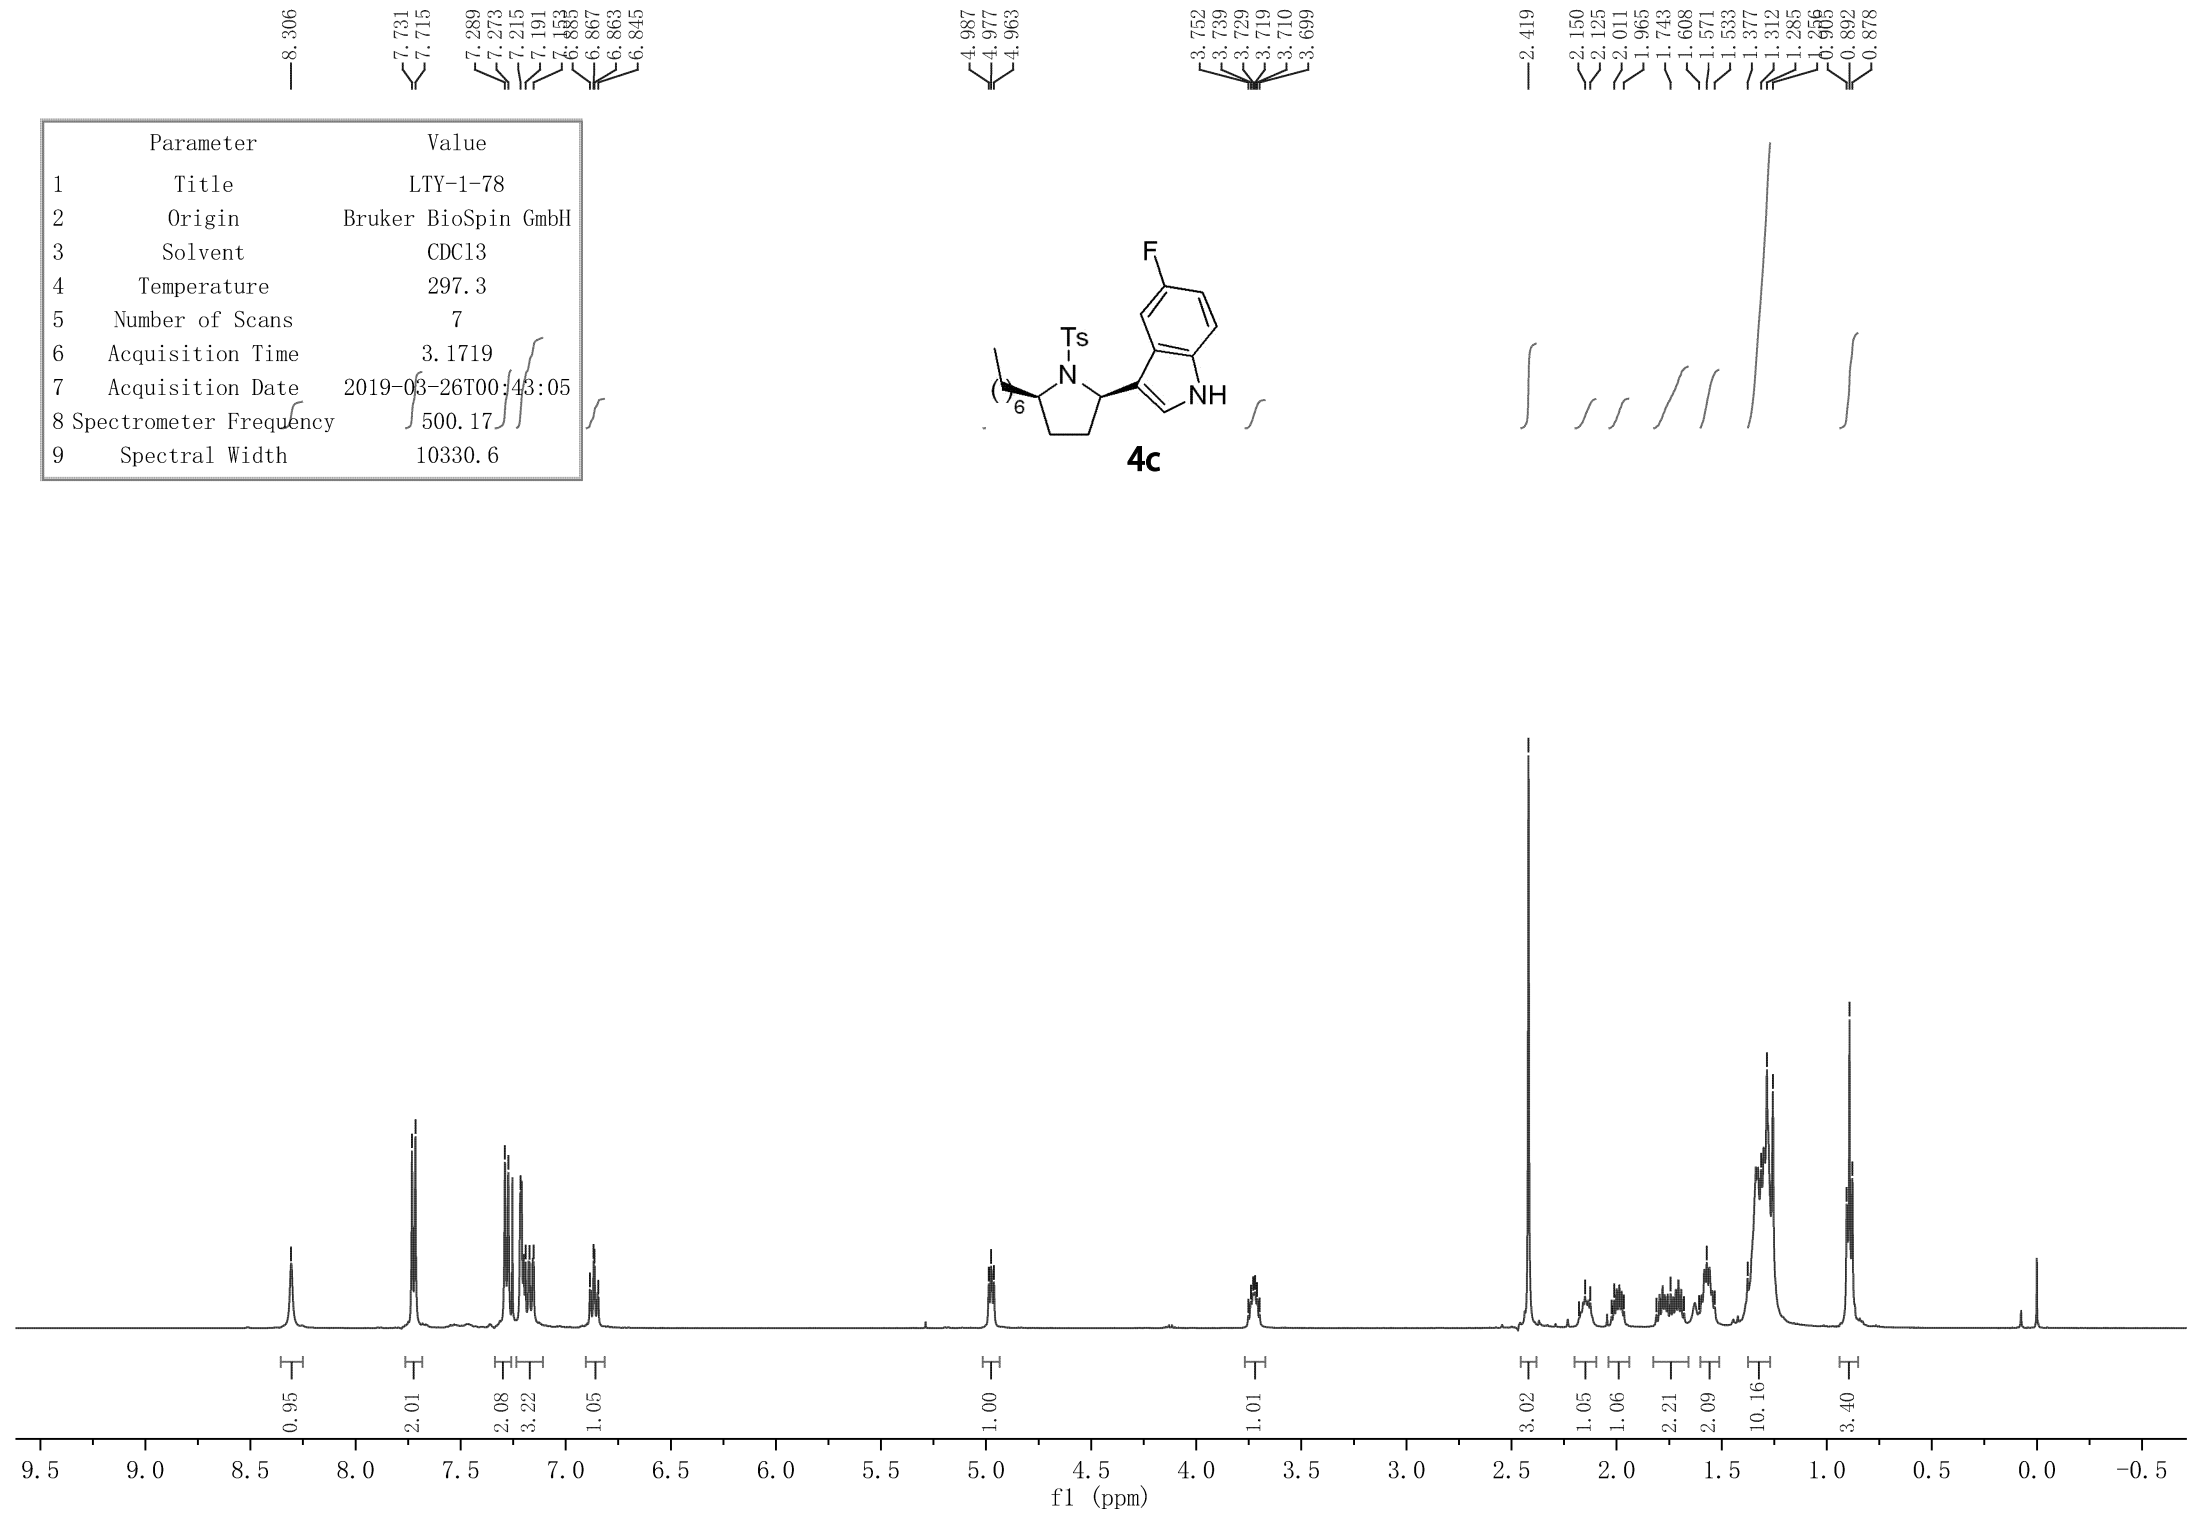

|   | Parameter              | Value               |
|---|------------------------|---------------------|
| 1 | Title                  | LTY-1-78-C          |
| 2 | Origin                 | Bruker BioSpin GmbH |
| 3 | Solvent                | CDC13               |
| 4 | Temperature            | 298.0               |
| 5 | Number of Scans        | 77                  |
| 6 | Acquisition Time       | 1.1010              |
| 7 | Acquisition Date       | 2019-03-26T00:45:44 |
| 8 | Spectrometer Frequency | 125.77              |
| 9 | Spectral Width         | 29761.9             |

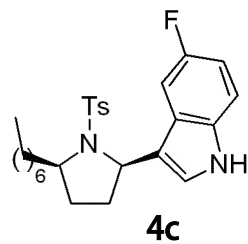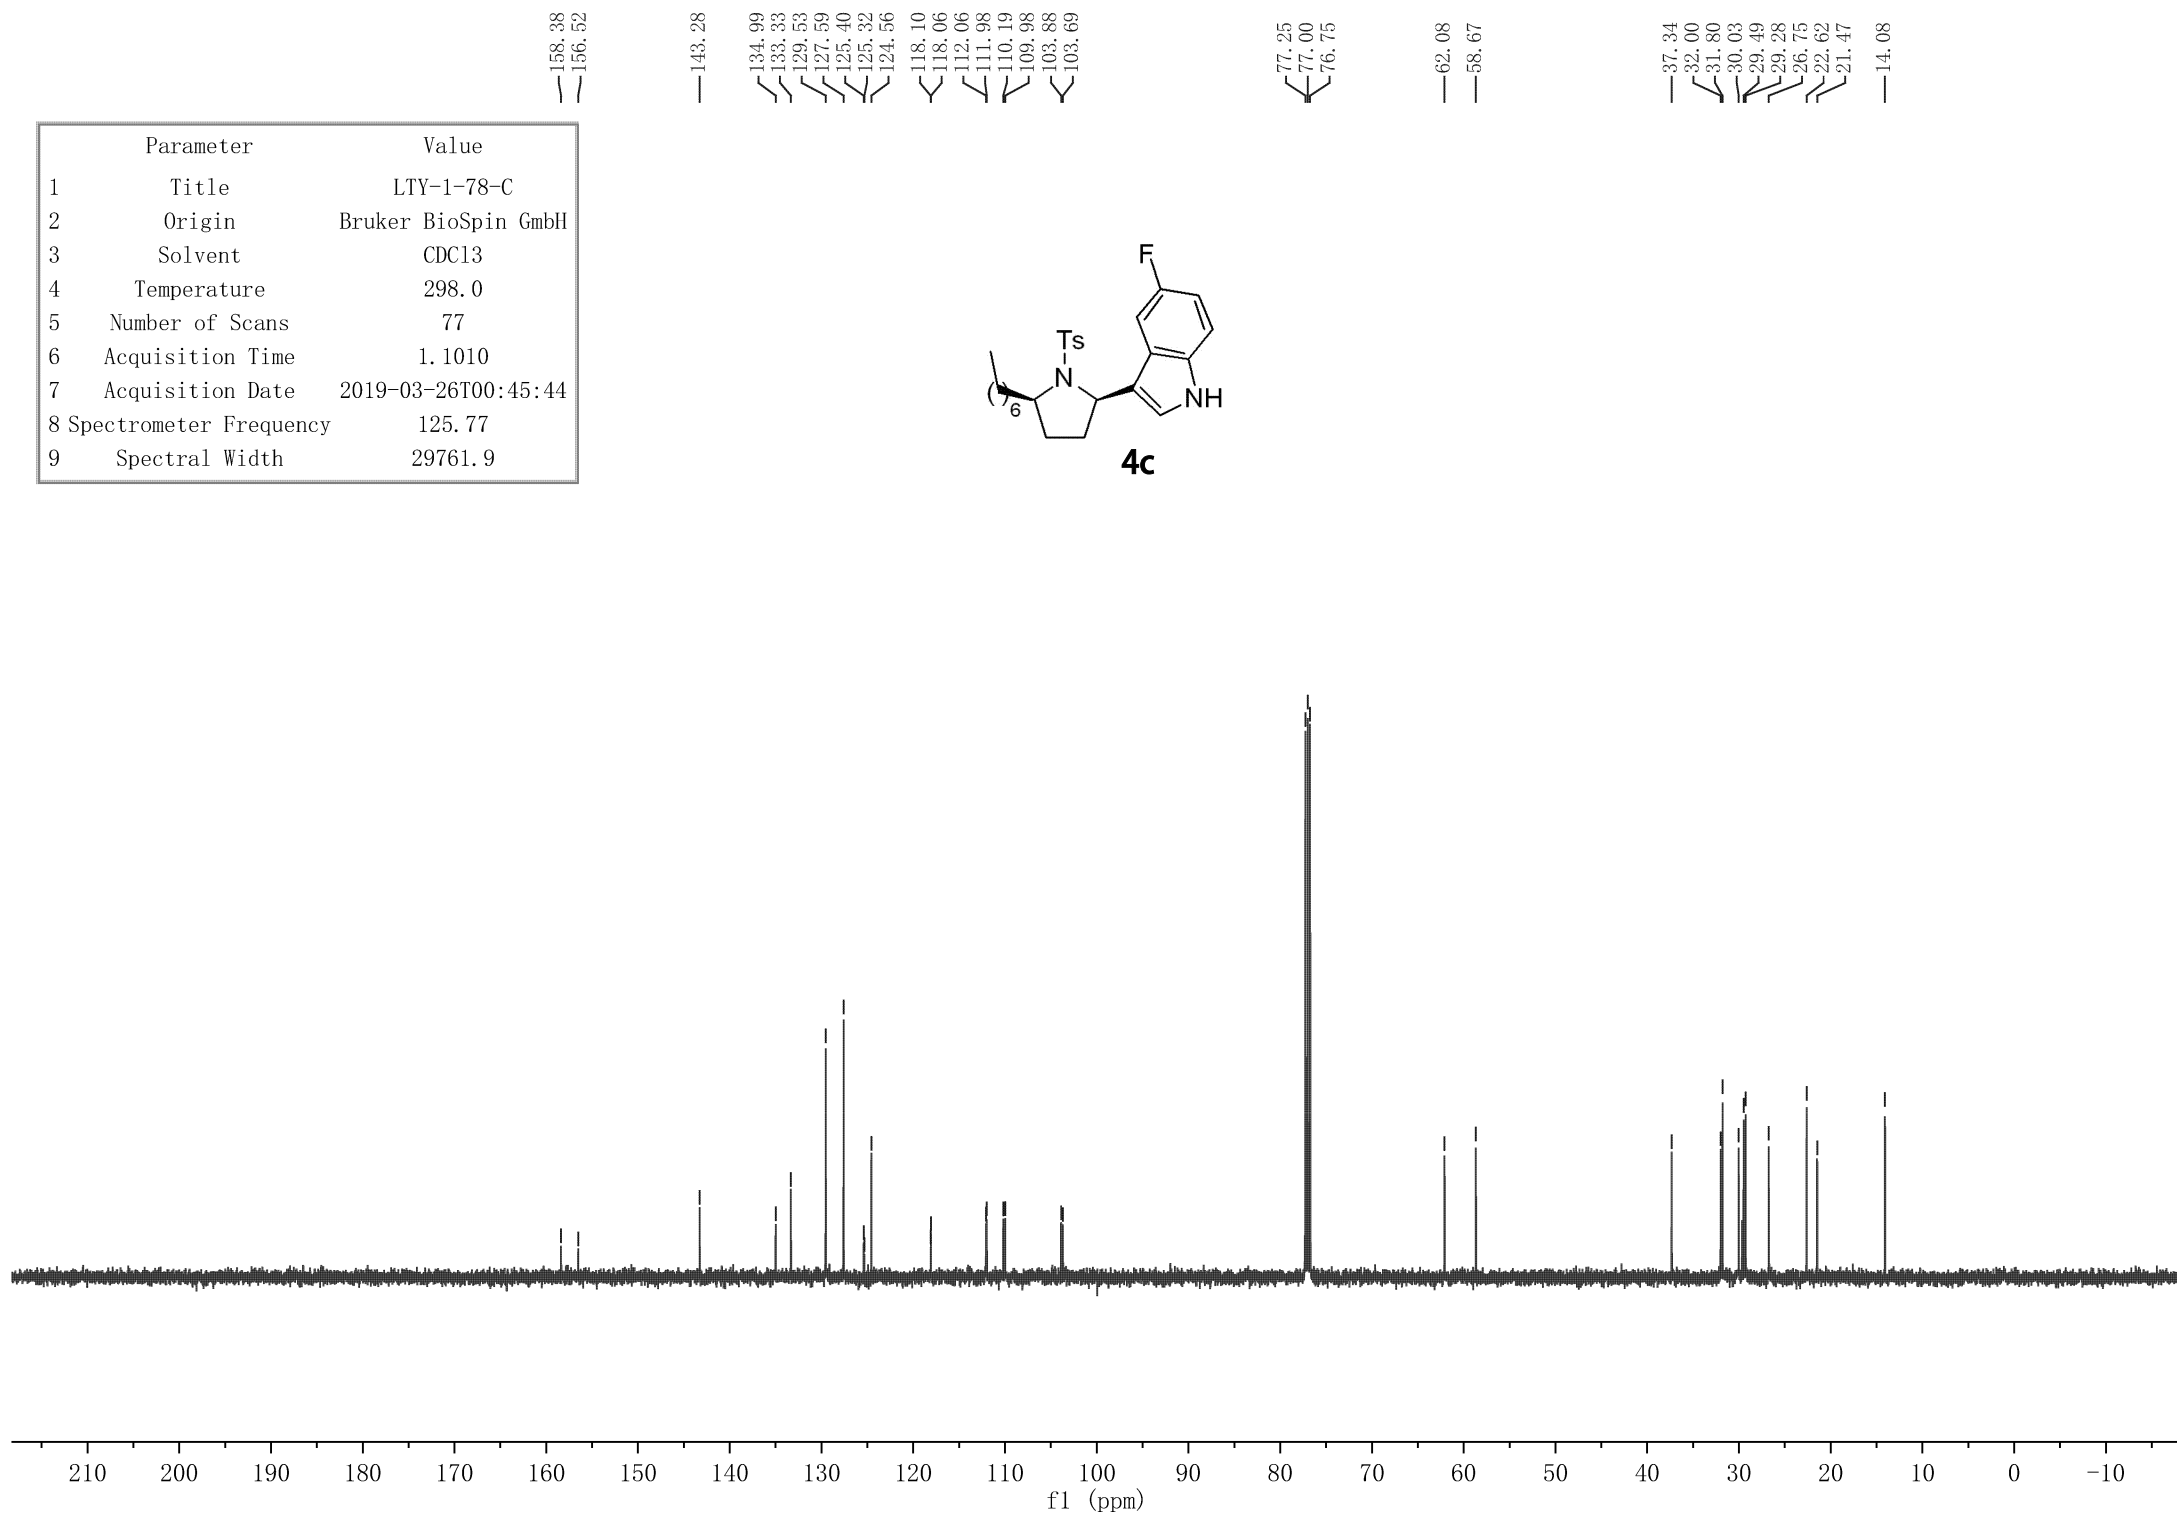

| Parameter                | Value               |
|--------------------------|---------------------|
| 1 Title                  | LTY-1-74-P1         |
| 2 Origin                 | Bruker BioSpin GmbH |
| 3 Solvent                | CDC13               |
| 4 Temperature            | 298.5               |
| 5 Number of Scans        | 12                  |
| 6 Acquisition Time       | 3.1719              |
| 7 Acquisition Date       | 2019-03-21T04:31:26 |
| 8 Spectrometer Frequency | 500.17              |
| 9 Spectral Width         | 10330.6             |

8.824  
7.850  
7.757  
7.741  
7.349  
7.333  
7.312  
7.302  
7.275

5.014  
5.003  
4.999  
4.989  
3.745  
3.733  
3.721  
3.715  
3.702  
3.691

2.455  
2.155  
2.135  
1.948  
1.924  
1.859  
1.820  
1.687  
1.673  
1.566  
1.554  
1.400  
1.338  
1.283  
0.907  
0.894  
0.880

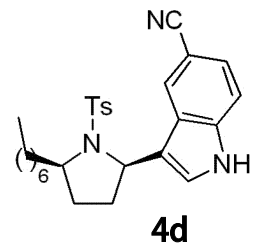

2.189  
2.155  
2.135  
1.985  
1.948  
1.924  
1.888  
1.859  
1.820  
1.739  
1.687  
1.673  
1.618  
1.566  
1.554

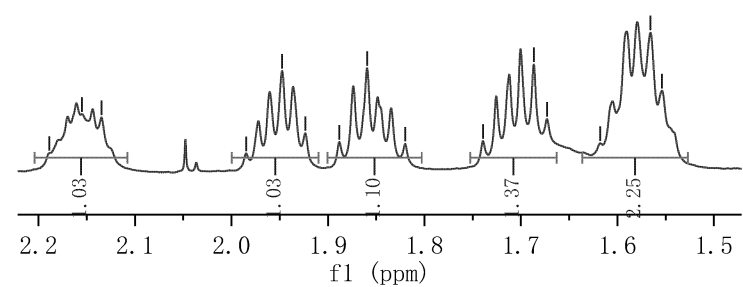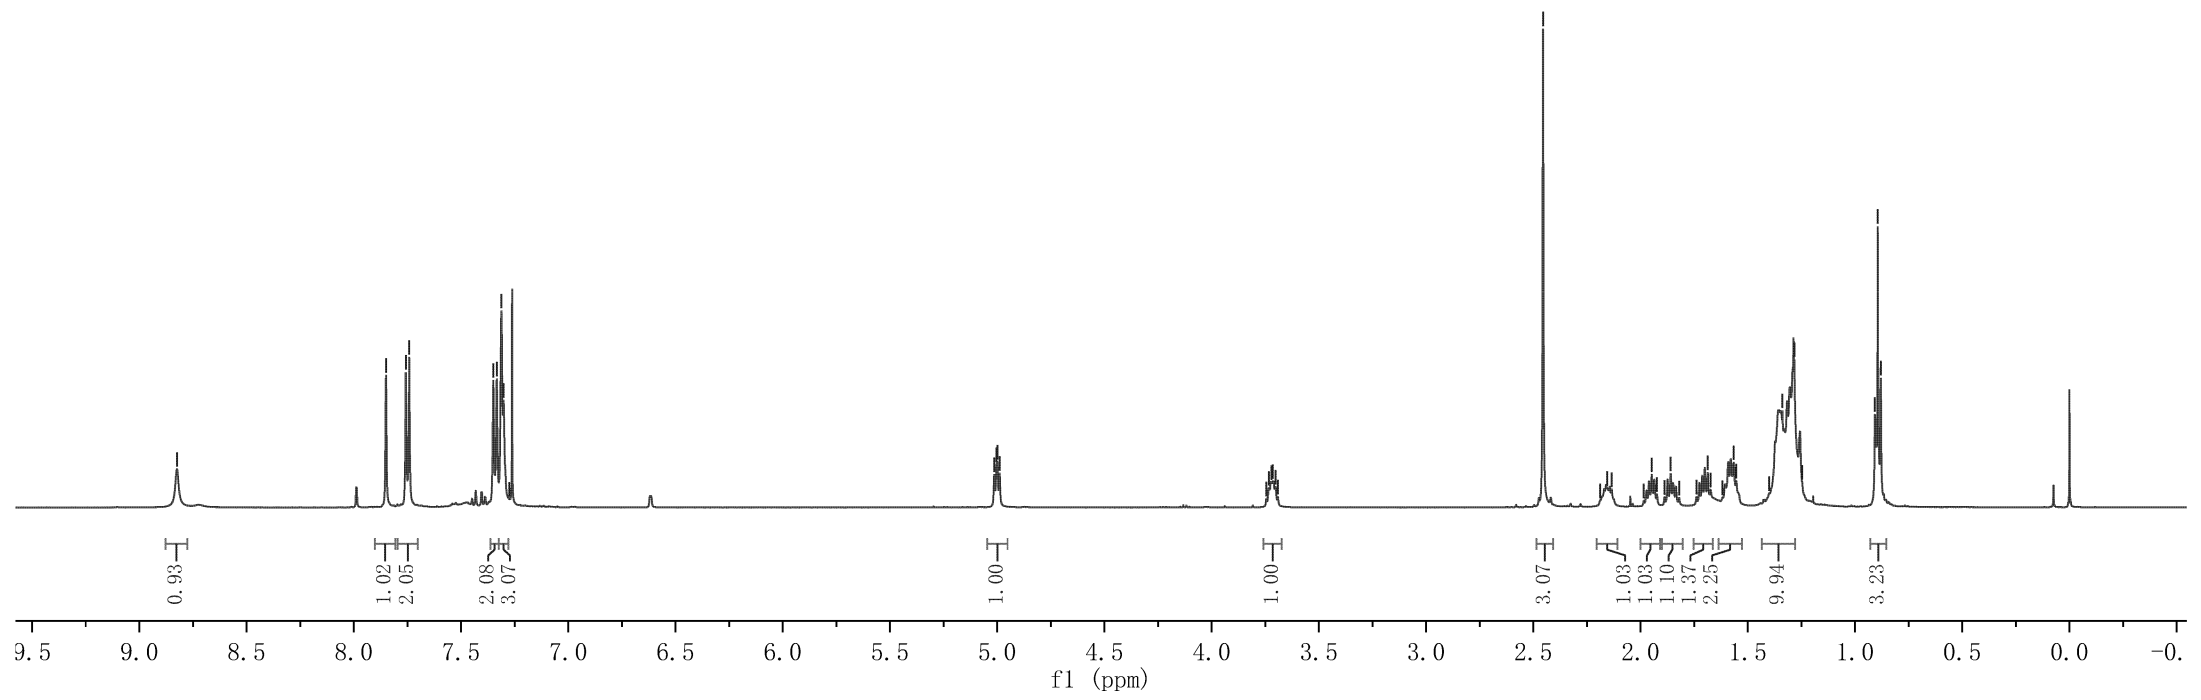

|   | Parameter              | Value               |
|---|------------------------|---------------------|
| 1 | Title                  | LTY-1-74-P1-C       |
| 2 | Origin                 | Bruker BioSpin GmbH |
| 3 | Solvent                | CDCl3               |
| 4 | Temperature            | 299.0               |
| 5 | Number of Scans        | 79                  |
| 6 | Acquisition Time       | 1.1010              |
| 7 | Acquisition Date       | 2019-03-21T04:34:24 |
| 8 | Spectrometer Frequency | 125.77              |
| 9 | Spectral Width         | 29761.9             |

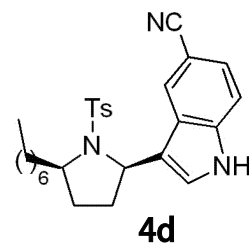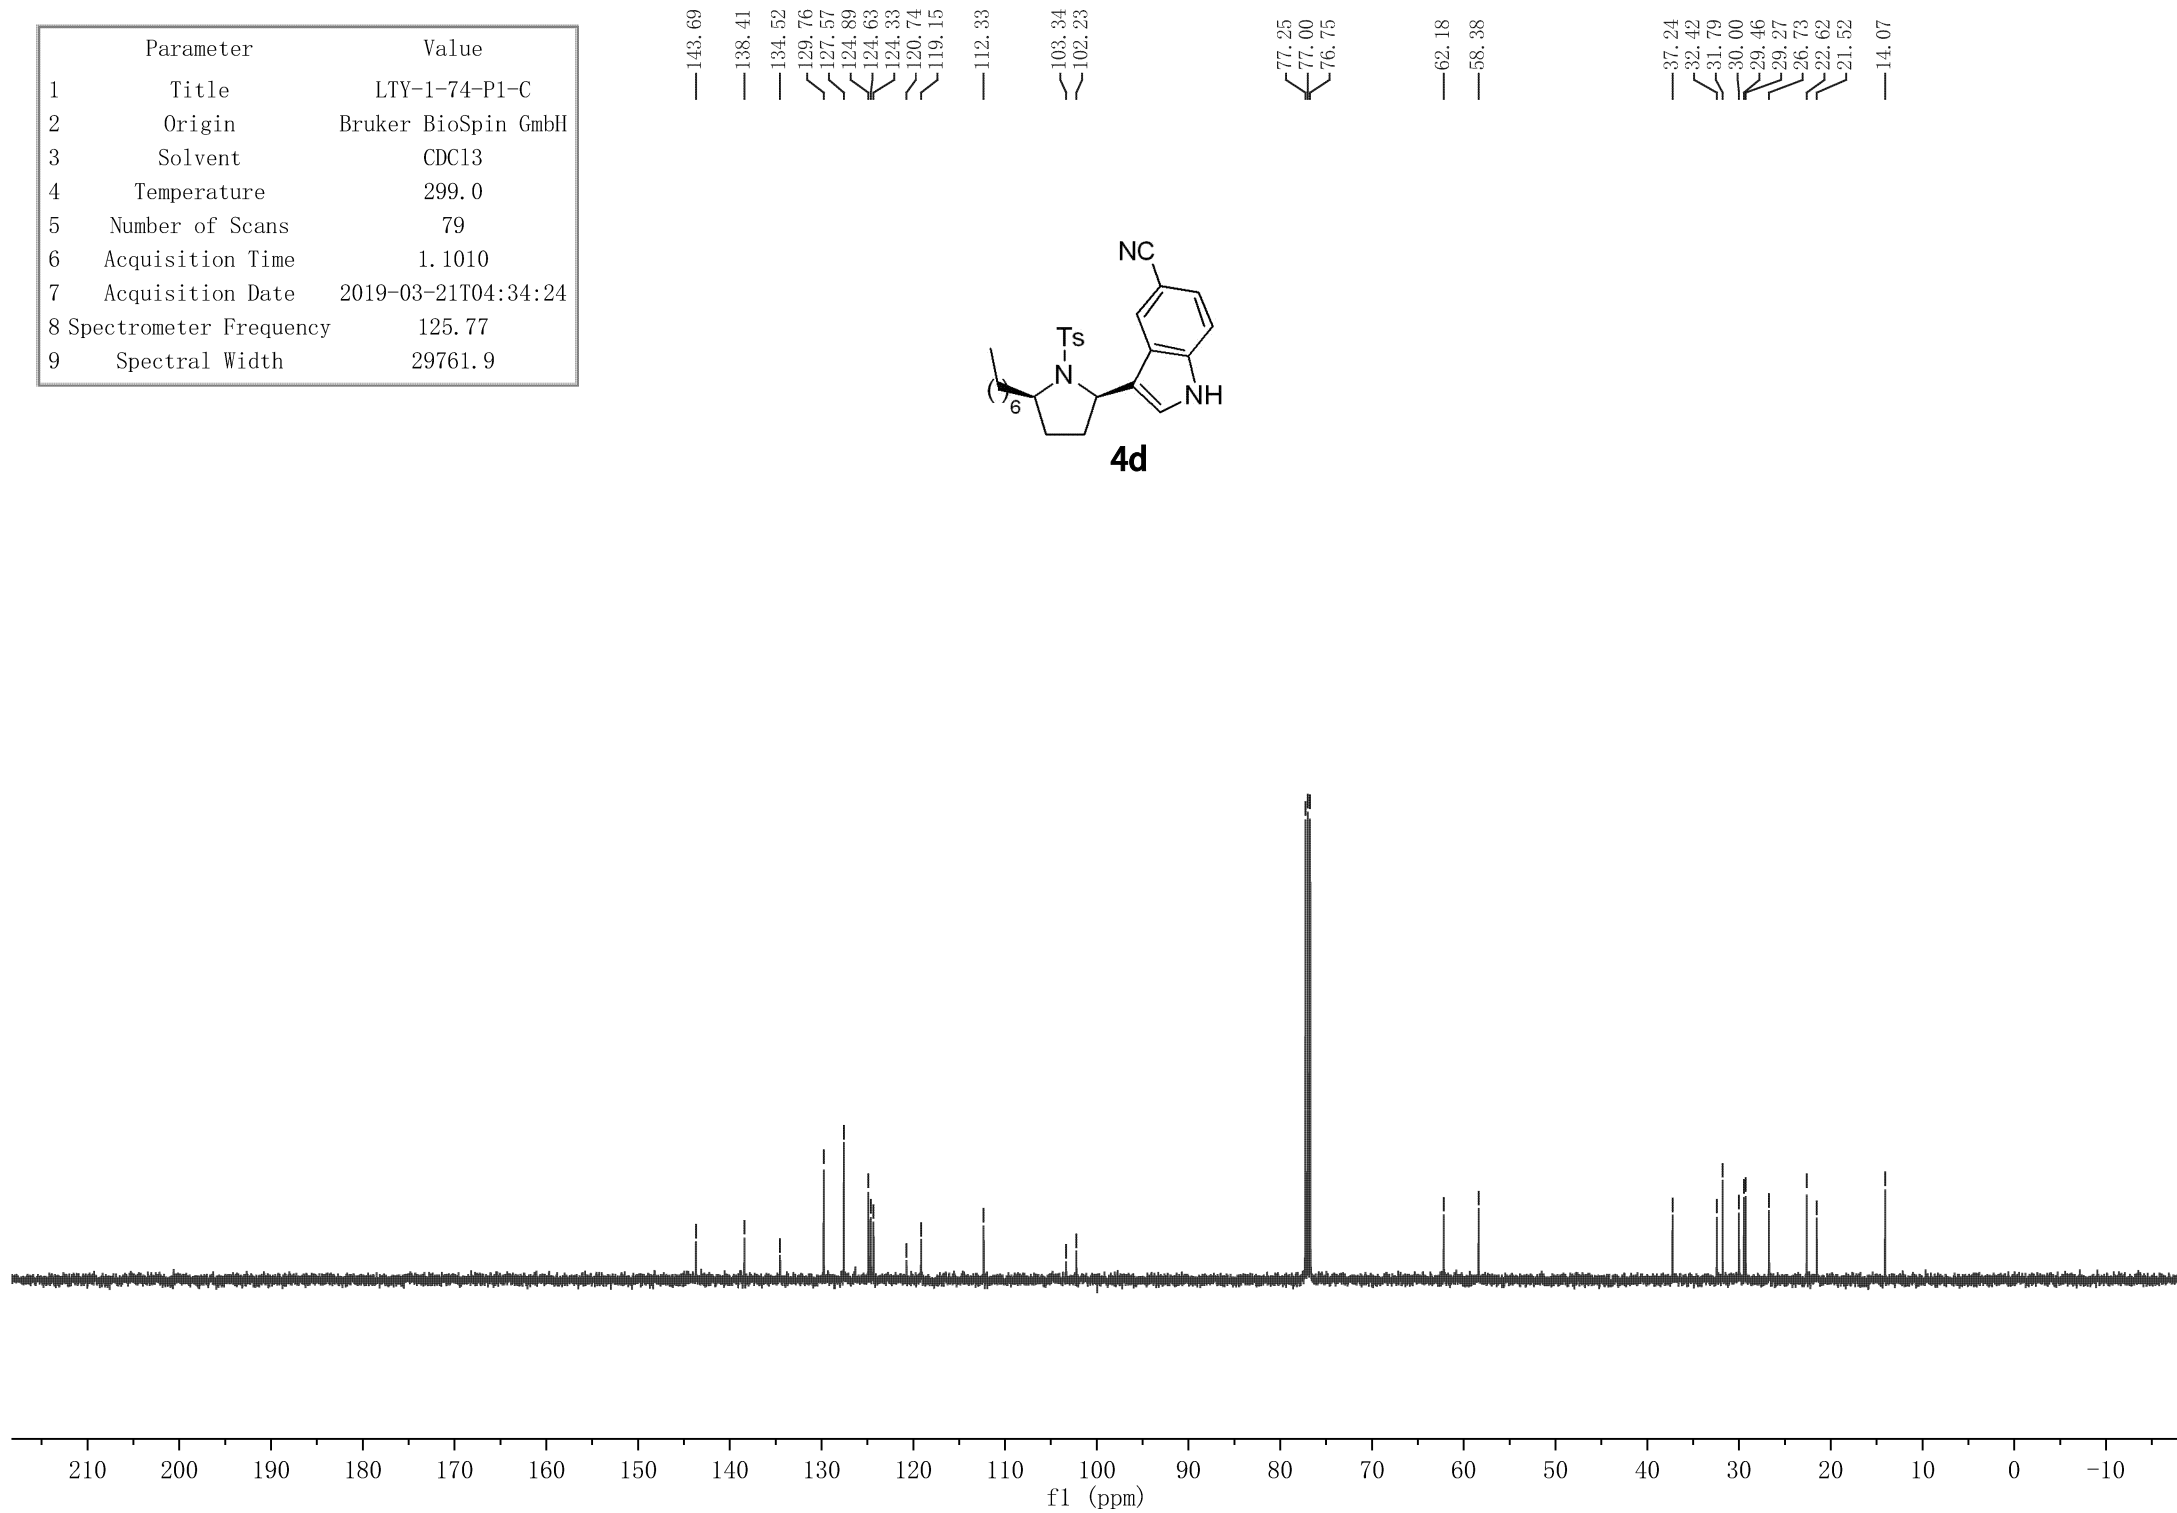

|   | Parameter              | Value               |
|---|------------------------|---------------------|
| 1 | Title                  | LTY-1-79            |
| 2 | Origin                 | Bruker BioSpin GmbH |
| 3 | Solvent                | CDC13               |
| 4 | Temperature            | 298.0               |
| 5 | Number of Scans        | 8                   |
| 6 | Acquisition Time       | 3.1719              |
| 7 | Acquisition Date       | 2019-03-23T04:37:49 |
| 8 | Spectrometer Frequency | 500.17              |
| 9 | Spectral Width         | 10330.6             |

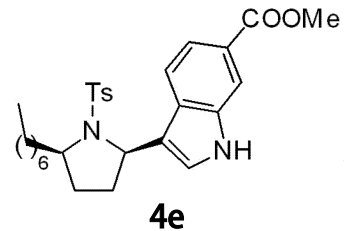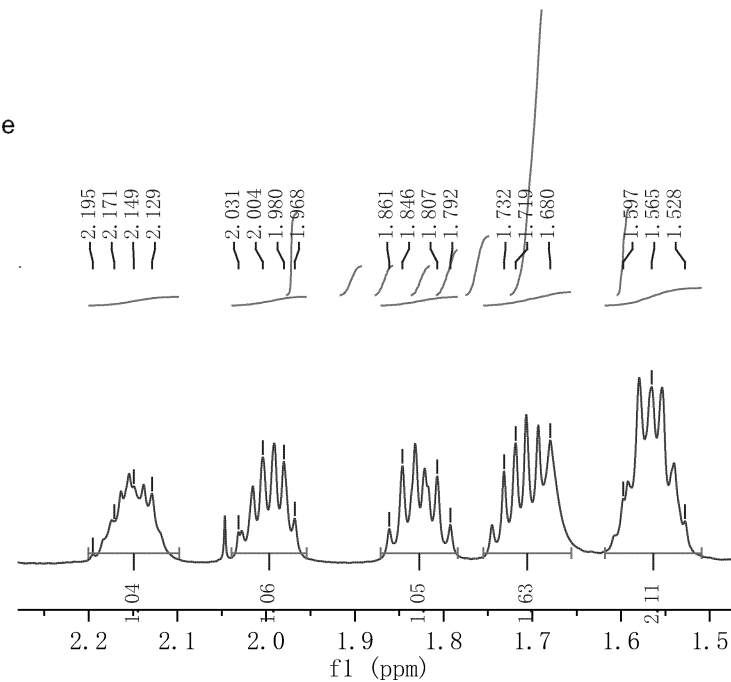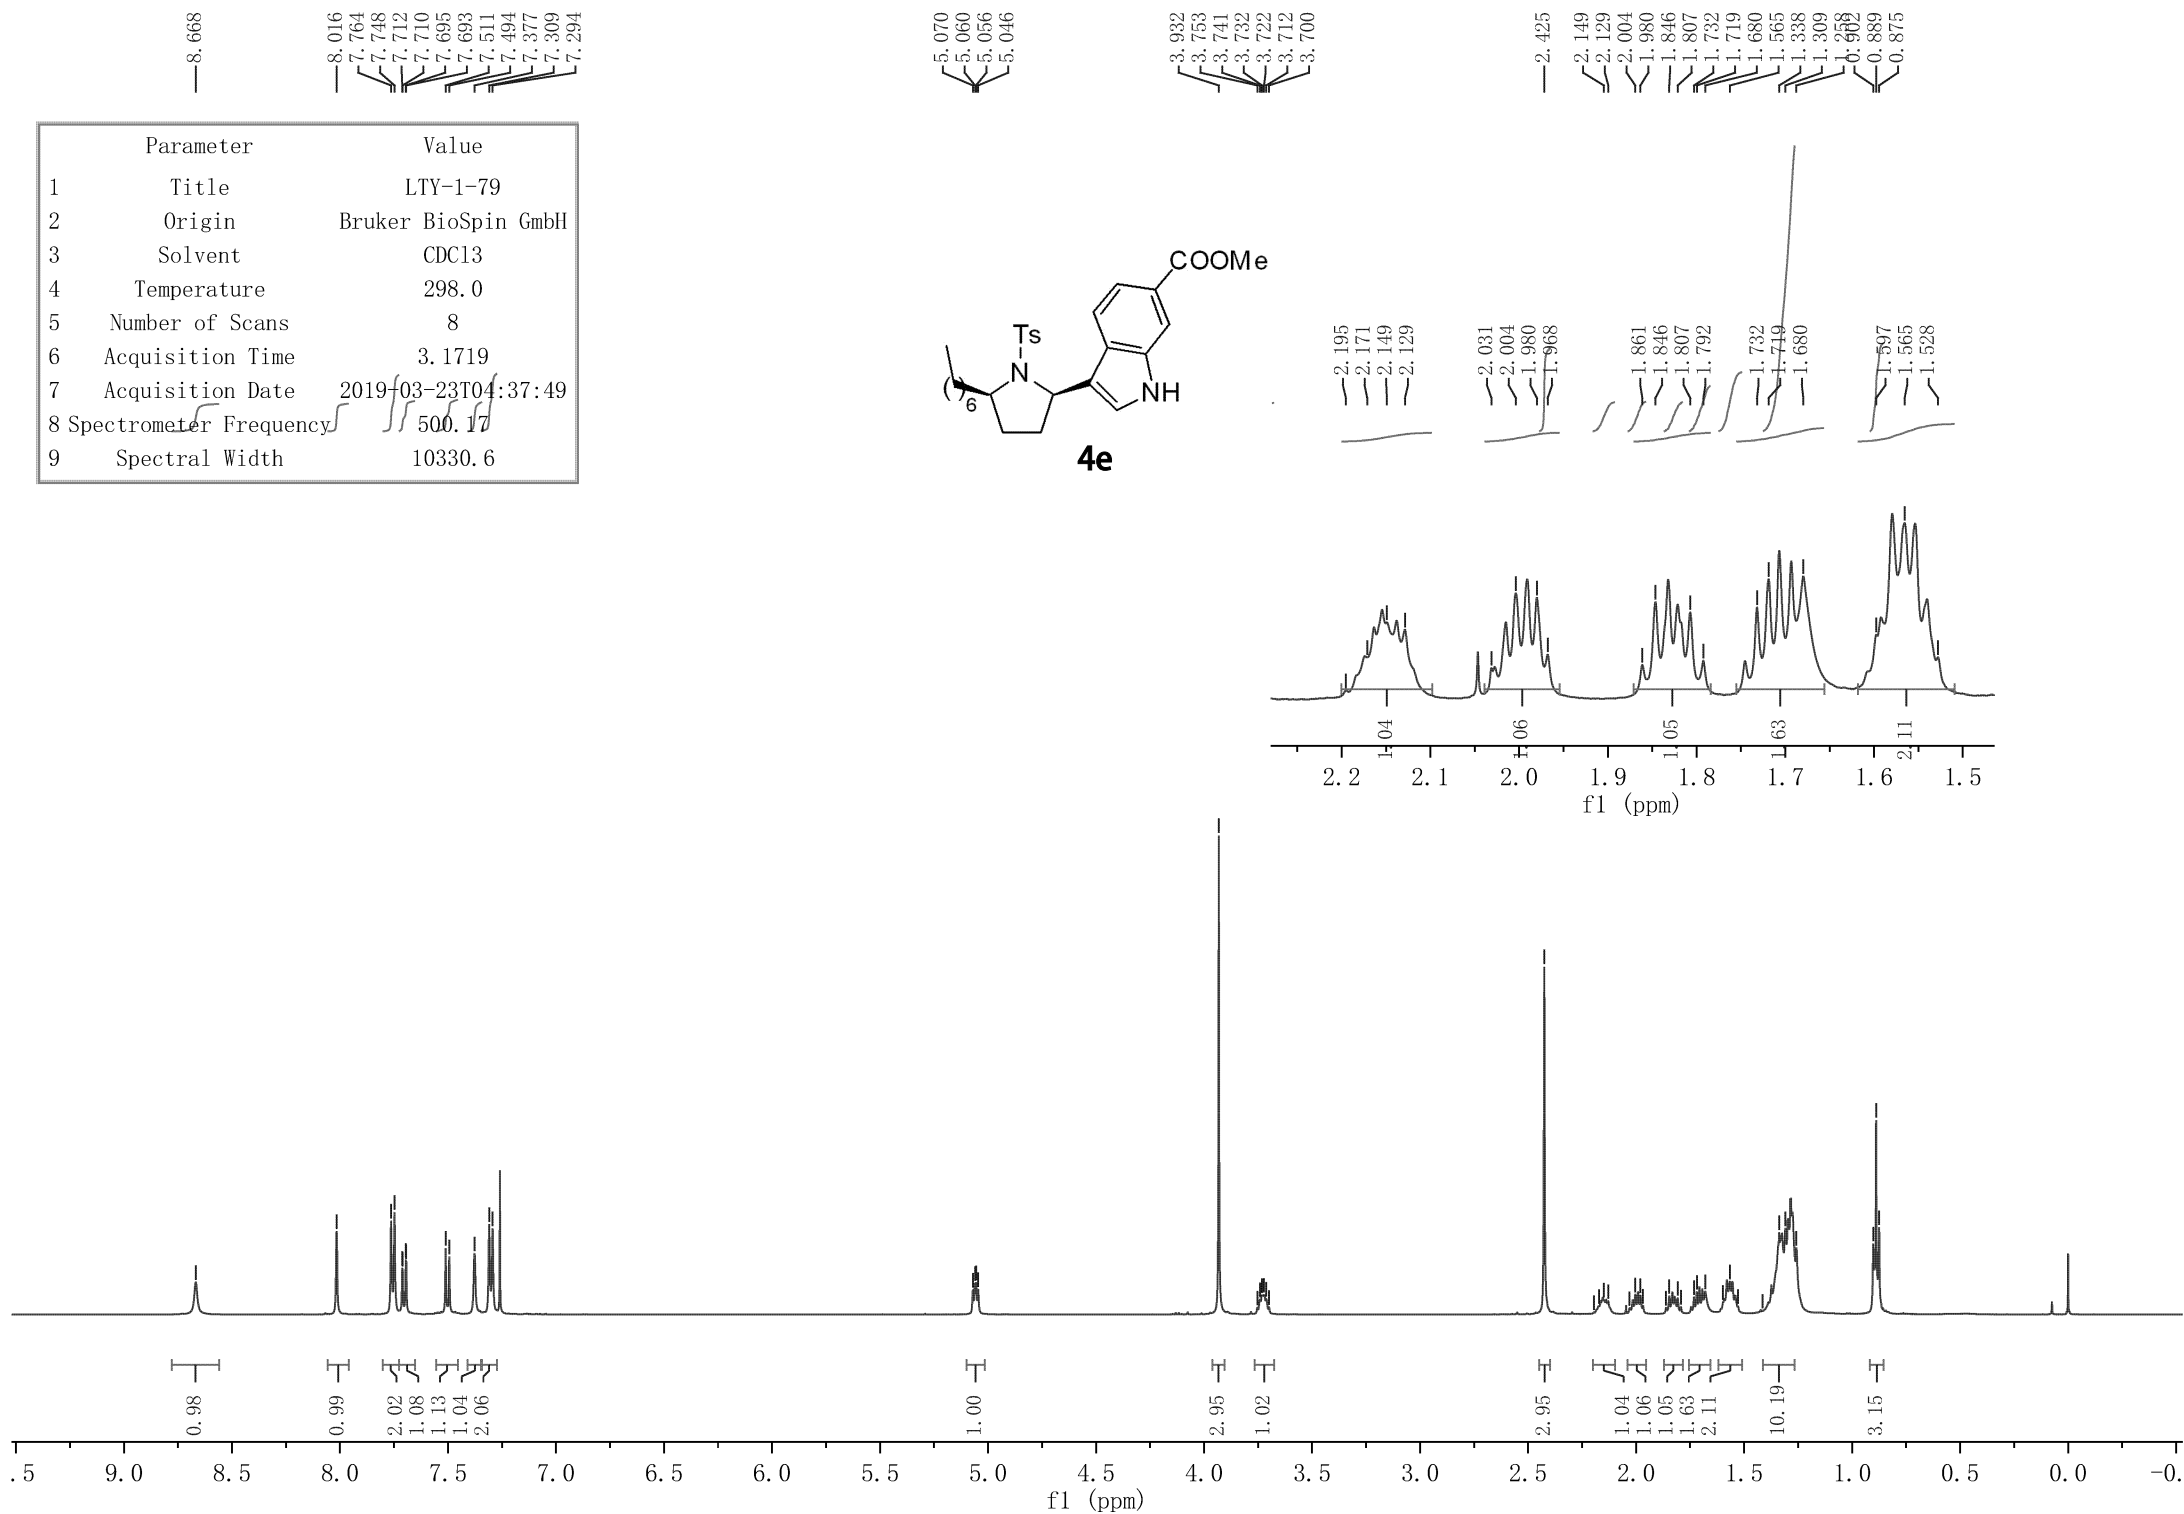

|   | Parameter              | Value               |
|---|------------------------|---------------------|
| 1 | Title                  | LTY-1-79-C          |
| 2 | Origin                 | Bruker BioSpin GmbH |
| 3 | Solvent                | CDC13               |
| 4 | Temperature            | 298.7               |
| 5 | Number of Scans        | 63                  |
| 6 | Acquisition Time       | 1.1010              |
| 7 | Acquisition Date       | 2019-03-23T04:40:55 |
| 8 | Spectrometer Frequency | 125.77              |
| 9 | Spectral Width         | 29761.9             |

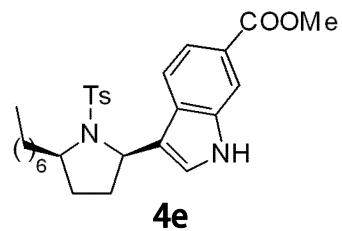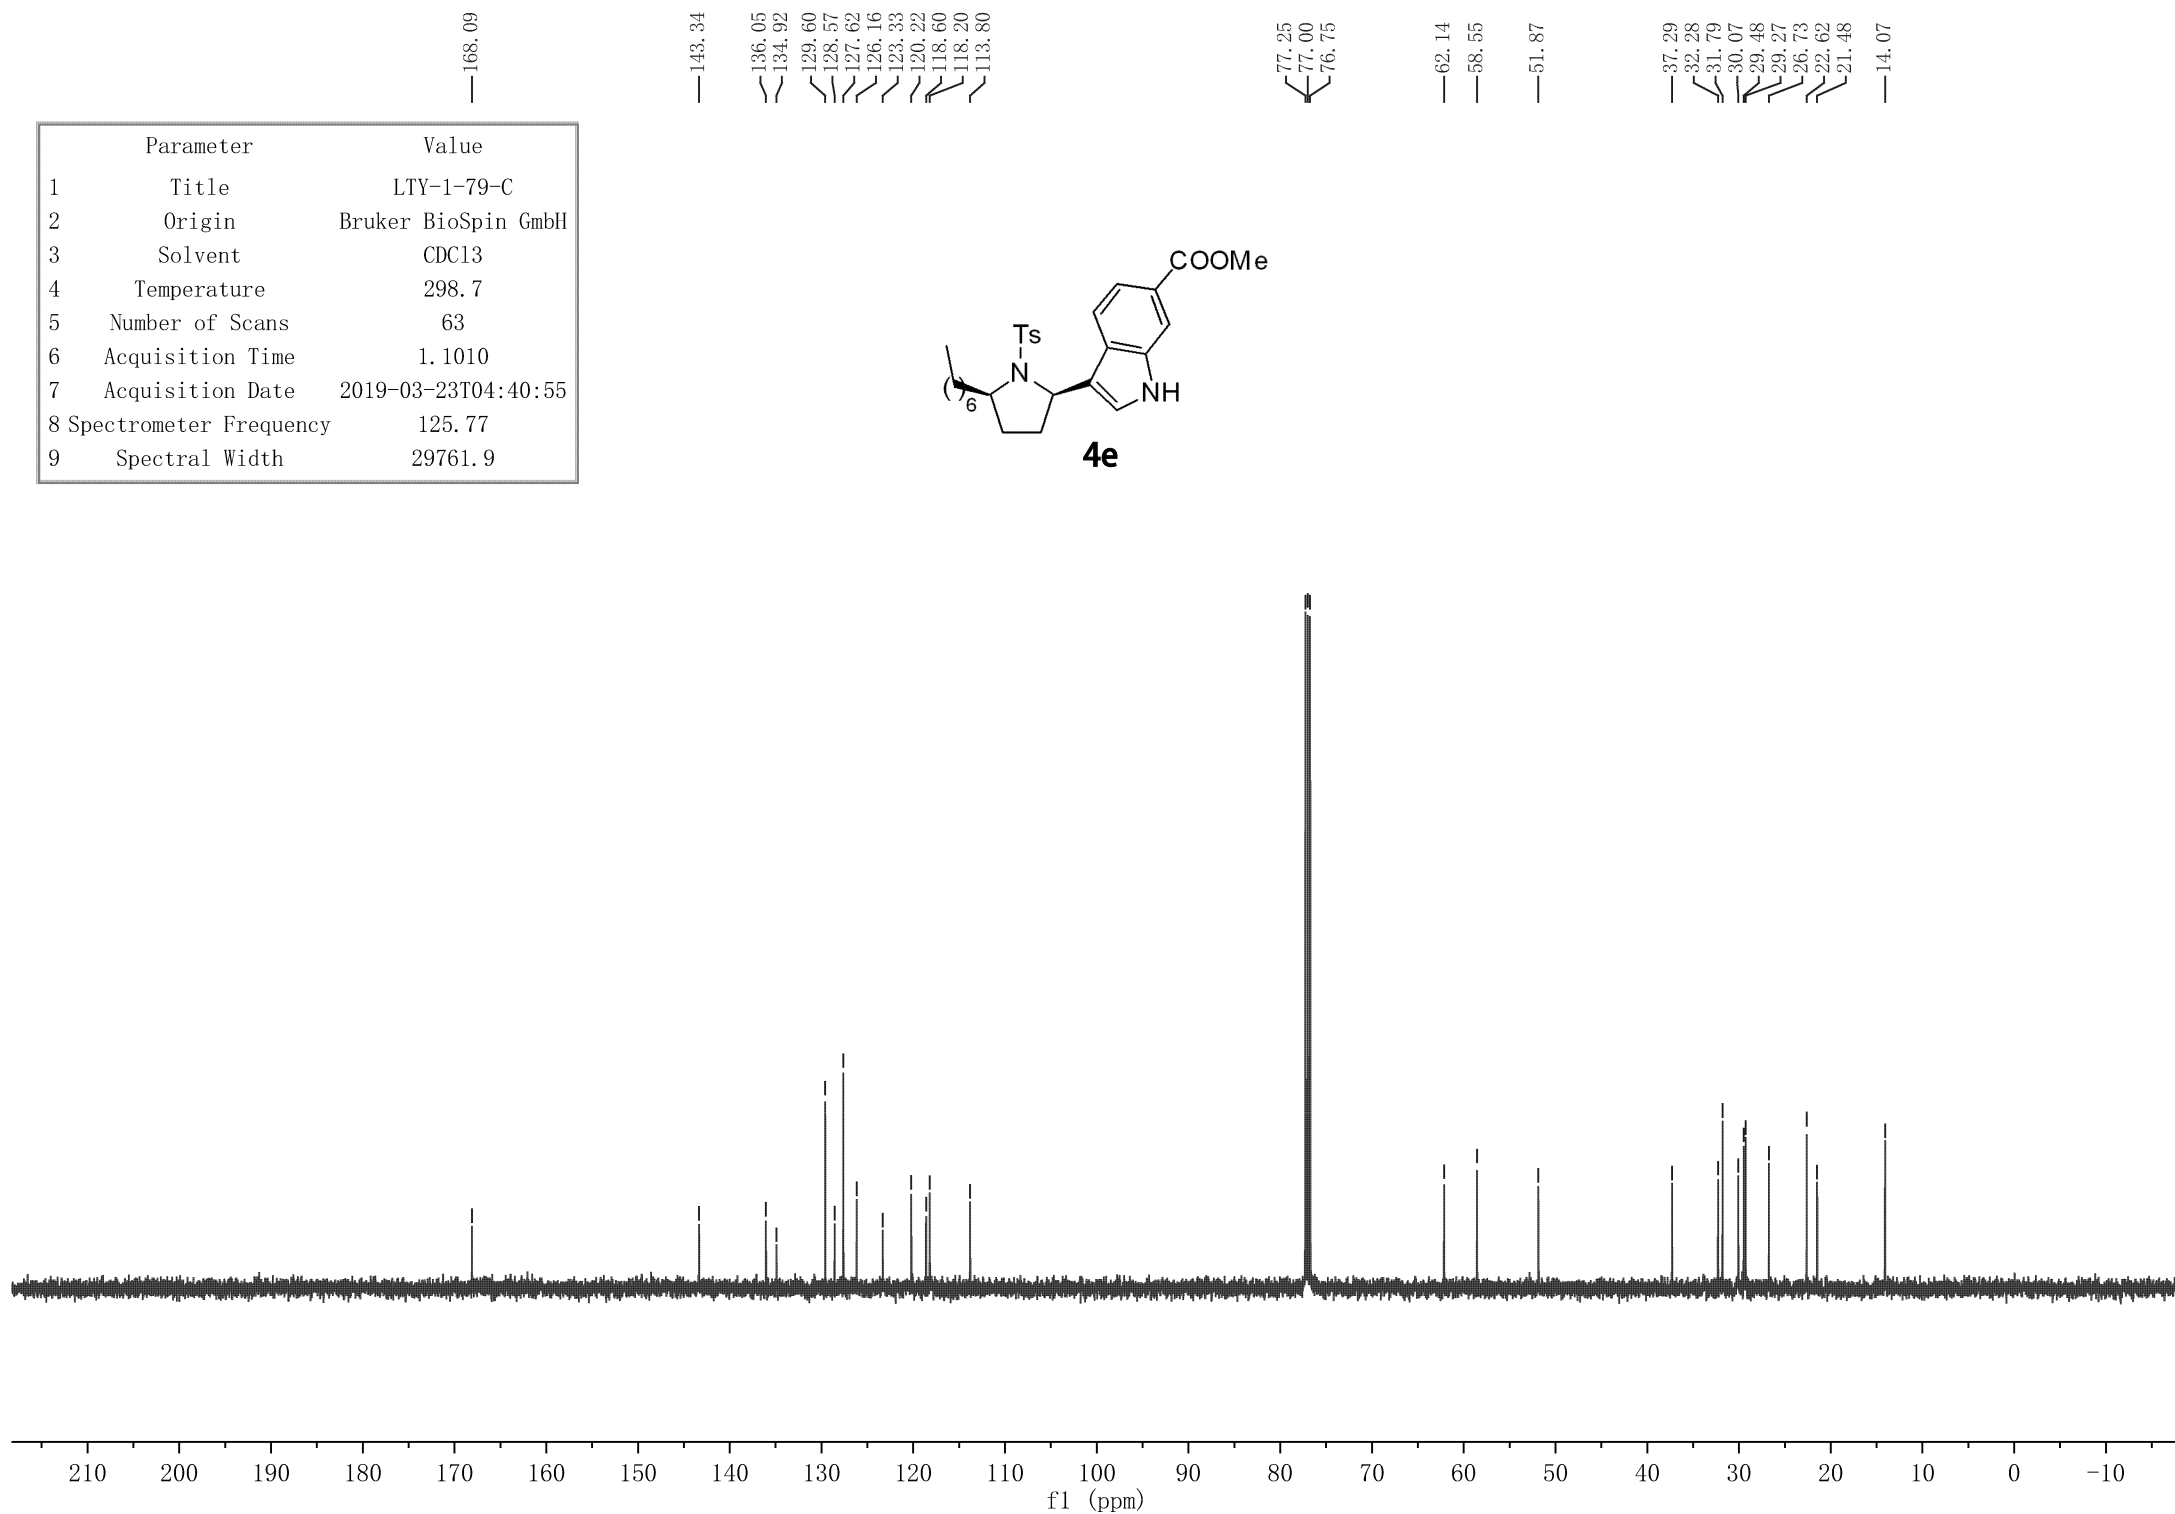

|   | Parameter              | Value               |
|---|------------------------|---------------------|
| 1 | Title                  | LTY-1-66            |
| 2 | Origin                 | Bruker BioSpin GmbH |
| 3 | Solvent                | CDC13               |
| 4 | Temperature            | 295.4               |
| 5 | Number of Scans        | 10                  |
| 6 | Acquisition Time       | 3.9846              |
| 7 | Acquisition Date       | 2019-03-18T13:39:20 |
| 8 | Spectrometer Frequency | 400.13              |
| 9 | Spectral Width         | 8223.7              |

7.693  
7.673  
7.303  
7.289  
7.269  
7.260

6.292  
6.284  
6.280  
6.274  
6.267

4.846  
4.836  
4.829  
4.818

3.742  
3.729  
3.716  
3.706  
3.693  
3.678

2.417  
2.062  
2.037  
1.994  
1.944  
1.769  
1.730  
1.525  
1.491  
1.444  
1.335  
1.285  
1.277  
0.959  
0.902  
0.885  
0.868

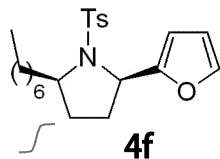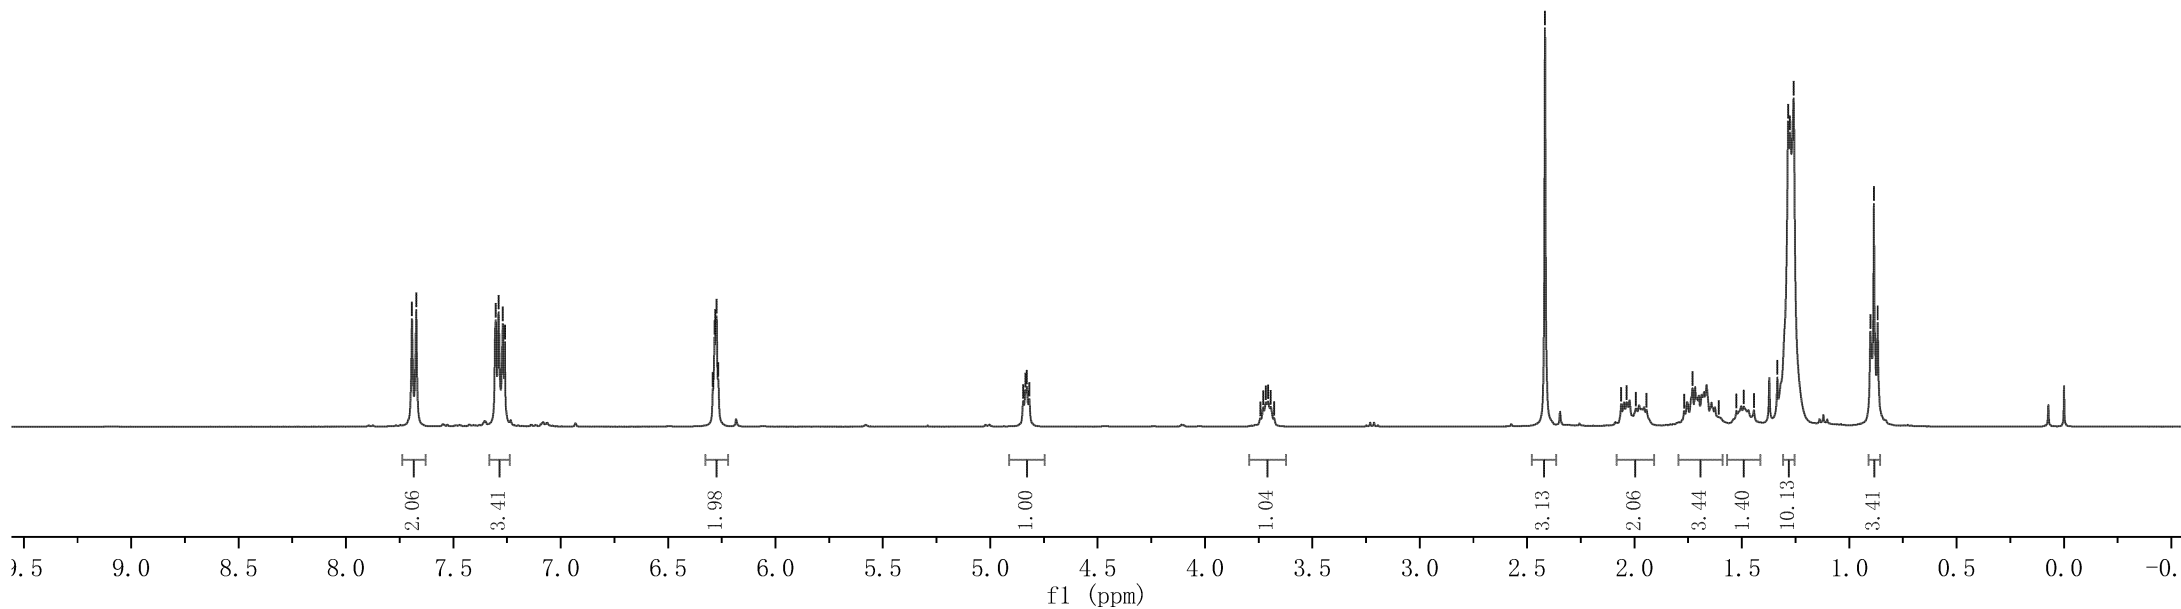

|   | Parameter              | Value               |
|---|------------------------|---------------------|
| 1 | Title                  | LTY-1-66-C          |
| 2 | Origin                 | Bruker BioSpin GmbH |
| 3 | Solvent                | CDCl3               |
| 4 | Temperature            | 295.4               |
| 5 | Number of Scans        | 35                  |
| 6 | Acquisition Time       | 1.3631              |
| 7 | Acquisition Date       | 2019-03-18T13:41:37 |
| 8 | Spectrometer Frequency | 100.61              |
| 9 | Spectral Width         | 24038.5             |

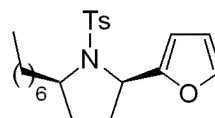

**4f**

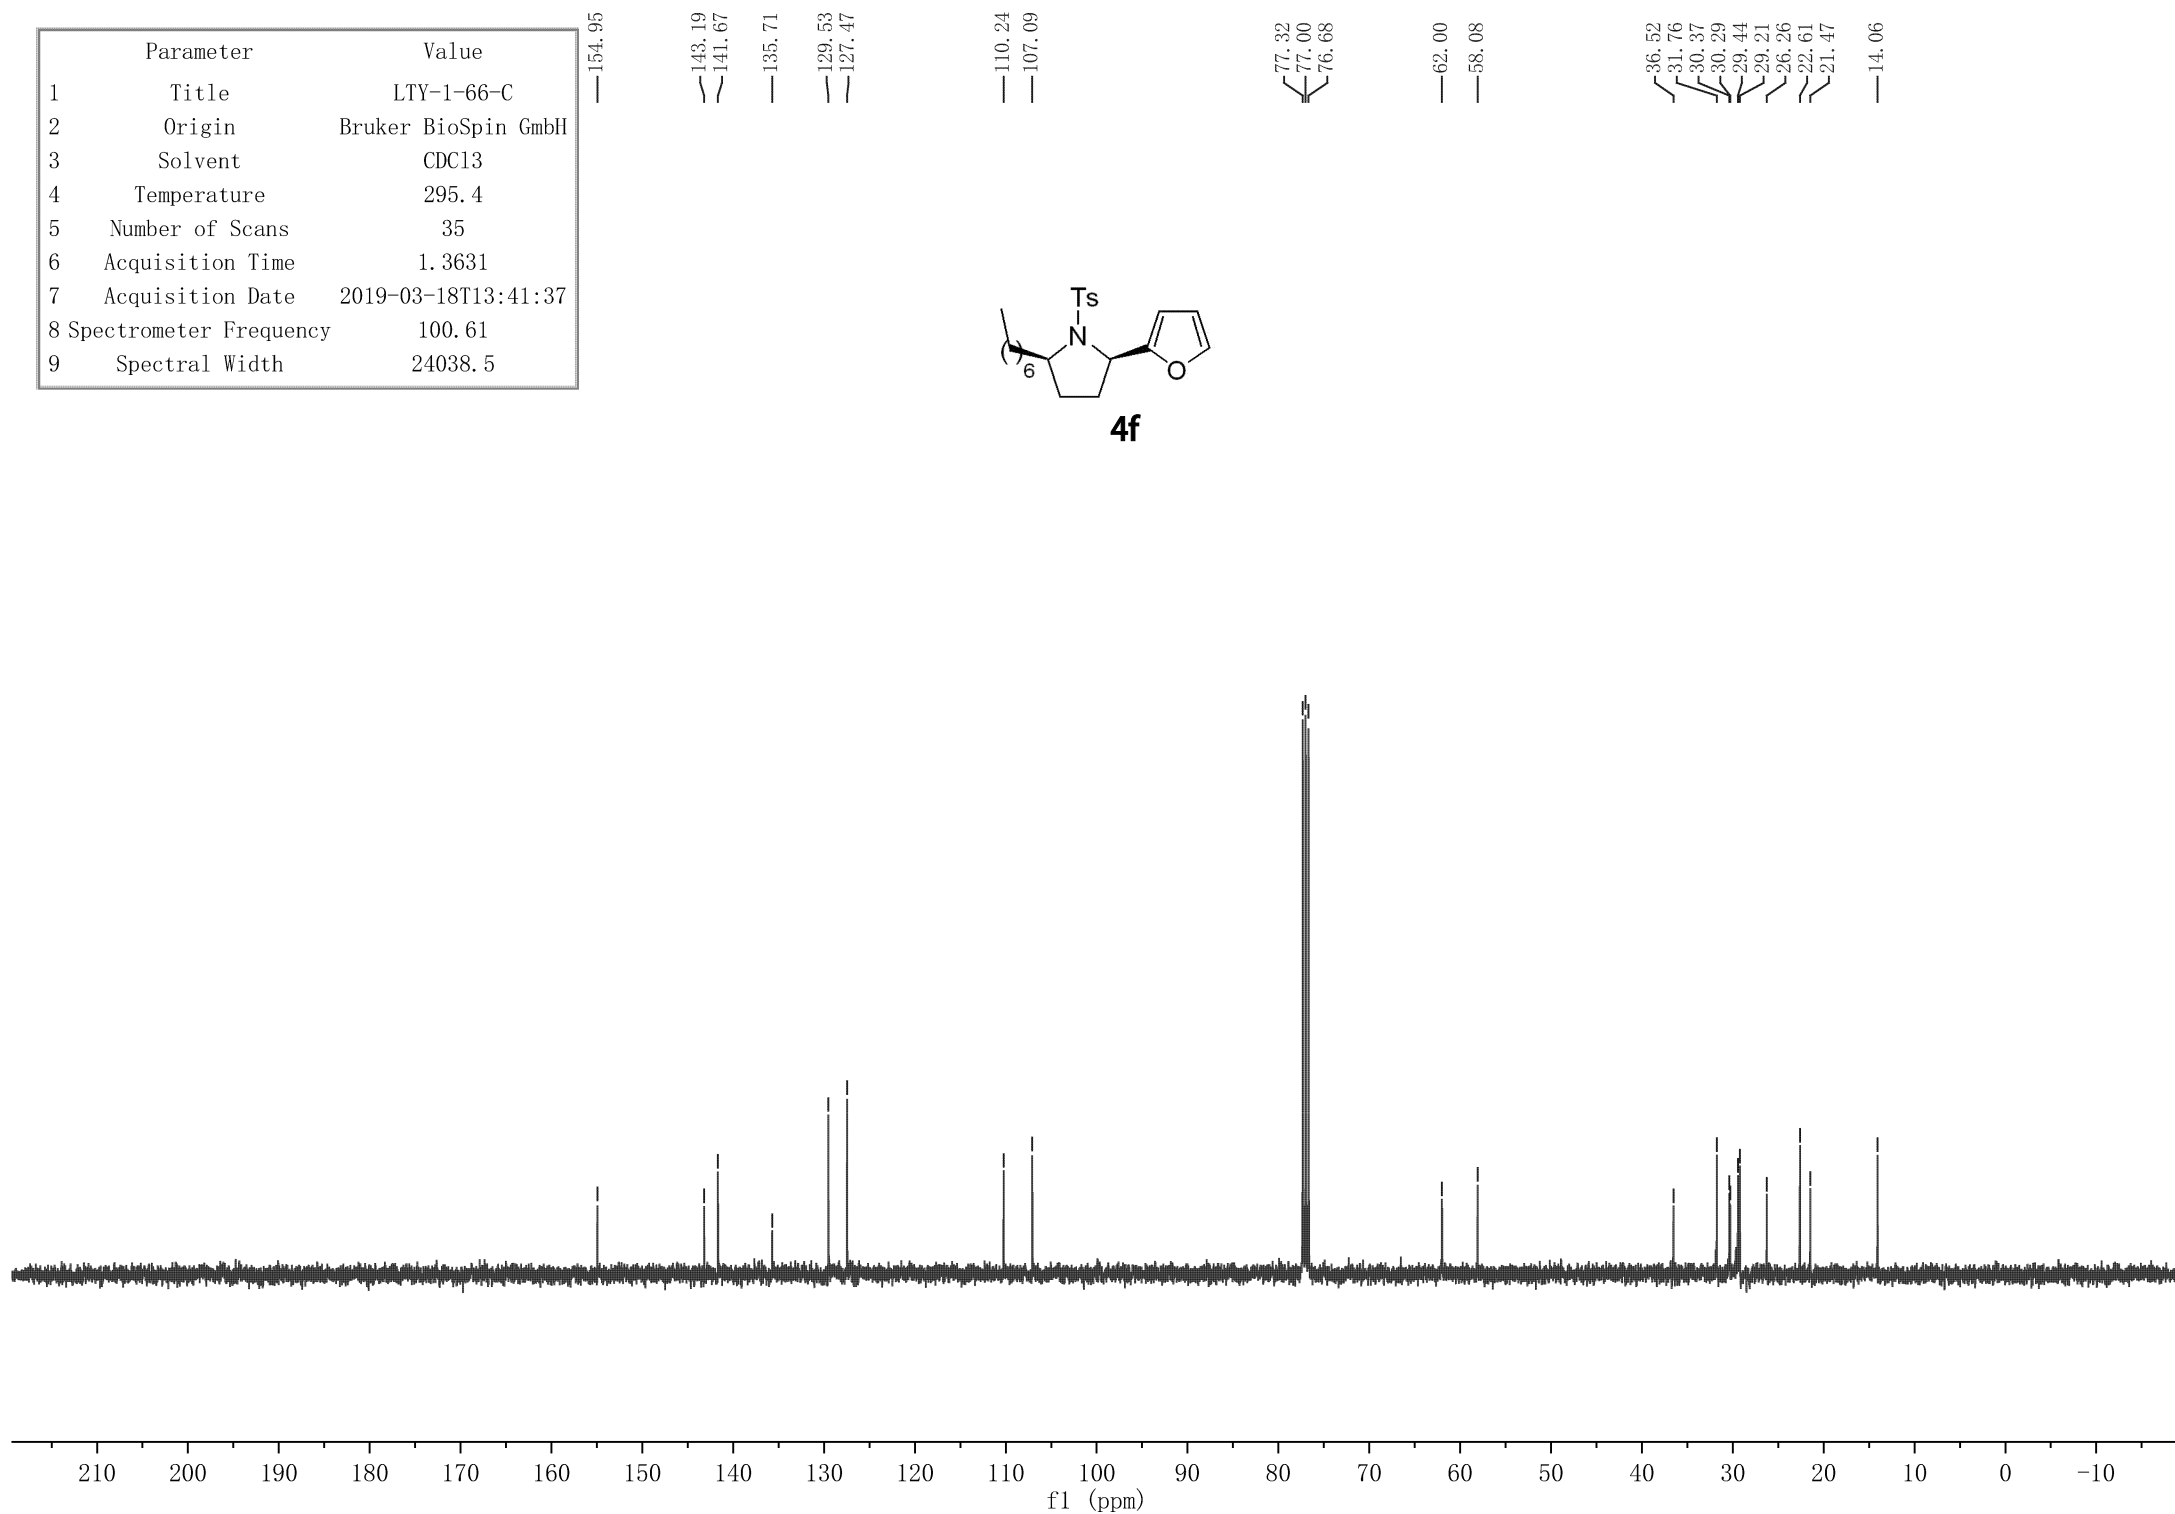

Supplement: c9cc05295j1.pdf [file c9cc05295j1.pdf]
